# Supplementary material for: The Proteome of Tetrasphaera elongata is adapted to Changing Conditions in Wastewater Treatment Plants
Source: Proteomes. 2019 Apr 25;7(2):16. doi: 10.3390/proteomes7020016 (PMC6630437; doi:10.3390/proteomes7020016)
Supplement: Supplementary file 1 [file proteomes-07-00016-s001.xlsx]

## Sheet: Information
Supplementary Information
The proteome of Tetrasphaera elongata is preadapted to changing environmental conditions in wastewater treatment plants
Florian-Alexander Herbst1, Morten Simonsen Dueholm1, Reinhard Wimmer1, Per Halkjær Nielsen1*
1Center for Microbial Communities, Department of Chemistry and Bioscience, Aalborg University, Aalborg, Denmark
T. elongata Quantitation results contains quantified proteins of T. elongata after imputation and multiple testing corrected t-test p-values
E. coli Quantitation results contains quantified proteins of E. coli after imputation and multiple testing corrected t-test p-values
T. elongata RAW_Proteins contains the raw protein output from MaxQuant analysis of T. elongata
E. coli RAW_Proteins contains the raw protein output from MaxQuant analysis of E. coli

## Sheet: T. elongata Quantitation_Result
Significant	-log p	Difference (log2 anoxic/oxic)	Majority protein IDs	3H_1	3H_2	3H_3	3H_4	Ox_1	Ox_2	Ox_3	Ox_4		Score	Intensity	MS/MS Count		Fasta headers
+	2.41684	2.51485	N0E219	27.1963	26.2713	27.1557	26.674	23.5618	24.7439	23.4012	25.531		23.023	667560000	21		tr|N0E219|N0E219_9MICO Formate dehydrogenase, alpha subunit OS=Tetrasphaera elongata Lp2 GN=BN10_720016 PE=4 SV=1
+	3.45123	2.36768	N0DZ94	25.9517	25.6466	25.5765	25.8792	24.232	23.3082	22.7048	23.3383		39.301	306360000	13		tr|N0DZ94|N0DZ94_9MICO Uncharacterized ABC transporter ATP-binding protein ylmA OS=Tetrasphaera elongata Lp2 GN=ylmA PE=4 SV=1
+	3.24504	2.16055	N0E4Q3	25.8211	26.0239	25.5475	25.4964	23.7216	23.9504	23.9061	22.6686		34.556	438800000	12		tr|N0E4Q3|N0E4Q3_9MICO Phosphoglycolate phosphatase OS=Tetrasphaera elongata Lp2 GN=BN10_690025 PE=4 SV=1
+	2.29556	1.53452	N0E2T2	25.7996	25.5898	26.1199	25.8754	23.3609	24.8612	24.2951	24.7295		44.88	323690000	11		tr|N0E2T2|N0E2T2_9MICO Uncharacterized protein OS=Tetrasphaera elongata Lp2 GN=BN10_820018 PE=4 SV=1
+	2.12968	1.43343	N0DY40	26.0302	26.0316	25.6537	25.5601	23.7811	25.3599	24.231	24.1697		6.6103	347450000	9		tr|N0DY40|N0DY40_9MICO 7,8-diaminopelargonic acid synthase,PLP-dependent OS=Tetrasphaera elongata Lp2 GN=bioA PE=3 SV=1
+	1.82528	1.38766	N0E2Y3	24.7529	25.0661	24.901	24.142	22.9274	23.577	24.212	22.595		15.306	148770000	7		tr|N0E2Y3|N0E2Y3_9MICO Transcriptional regulator WhiB OS=Tetrasphaera elongata Lp2 GN=whiB PE=3 SV=1
+	1.96912	1.38619	N0E5V7	25.2393	24.8642	25.3514	25.2553	23.1013	23.2224	24.3856	24.4561		21.227	208130000	13		tr|N0E5V7|N0E5V7_9MICO Putative acyl-CoA synthetase OS=Tetrasphaera elongata Lp2 GN=BN10_640029 PE=4 SV=1
+	5.7174	1.25392	N0E4B1	30.9718	30.7871	30.9128	30.7083	29.5089	29.6817	29.5672	29.6065		323.31	10642000000	248		tr|N0E4B1|N0E4B1_9MICO Aspartate ammonia-lyase OS=Tetrasphaera elongata Lp2 GN=aspA PE=3 SV=1
+	2.02043	1.23594	N0E2A8	26.4098	25.7148	25.8439	26.041	24.9041	24.4128	25.5313	24.2176		21.5	367300000	10		tr|N0E2A8|N0E2A8_9MICO Putative ABC transporter OS=Tetrasphaera elongata Lp2 GN=BN10_390002 PE=3 SV=1
+	3.02885	1.07946	N0DZW1	29.2433	29.1839	29.2961	29.2242	28.481	27.656	28.2989	28.1938		323.31	3750000000	132		tr|N0DZW1|N0DZW1_9MICO NAD-specific glutamate dehydrogenase OS=Tetrasphaera elongata Lp2 GN=gdhB PE=4 SV=1
+	3.18842	1.00888	N0DYX5	26.8763	26.7786	27.2398	26.7046	25.8641	26.0695	26.0137	25.6165		29.627	778340000	18		tr|N0DYX5|N0DYX5_9MICO Lipoyl synthase OS=Tetrasphaera elongata Lp2 GN=lipA PE=3 SV=1
+	2.19341	0.946607	N0E5J6	27.7079	27.3347	27.5699	27.4556	27.0136	26.0371	26.8163	26.4148		55.37	1158400000	33		tr|N0E5J6|N0E5J6_9MICO Cystathionine gamma-synthase OS=Tetrasphaera elongata Lp2 GN=BN10_900026 PE=3 SV=1
+	1.98049	0.908861	N0DZ17	26.8064	26.3771	27.0483	26.9238	25.9283	25.6084	26.4274	25.556		75.403	719830000	36		tr|N0DZ17|N0DZ17_9MICO Uncharacterized protein OS=Tetrasphaera elongata Lp2 GN=BN10_300058 PE=3 SV=1
+	3.53618	0.899659	N0E2E5	32.8055	32.4369	32.6036	32.6992	31.7918	31.7112	31.94	31.5036		323.31	38796000000	367		tr|N0E2E5|N0E2E5_9MICO 30S ribosomal protein S11 OS=Tetrasphaera elongata Lp2 GN=rpsK PE=3 SV=1
+	2.70108	0.897628	N0E2E2	27.9705	27.6947	27.8494	27.6871	26.5038	26.9934	27.2637	26.8502		97.786	1428000000	64		tr|N0E2E2|N0E2E2_9MICO Nicotine dehydrogenase chain C OS=Tetrasphaera elongata Lp2 GN=BN10_460052 PE=4 SV=1
+	1.90498	0.890186	N0E5T0	28.8394	28.9691	29.3158	28.368	28.4153	27.7427	28.0297	27.7439		45.145	3134100000	42		tr|N0E5T0|N0E5T0_9MICO Uncharacterized protein OS=Tetrasphaera elongata Lp2 GN=BN10_990006 PE=4 SV=1
+	5.83396	0.878862	N0E4E9	33.5337	33.62	33.4432	33.6277	32.7044	32.6991	32.6266	32.679		323.31	72269000000	920		tr|N0E4E9|N0E4E9_9MICO Phosphoenolpyruvate carboxykinase [GTP] OS=Tetrasphaera elongata Lp2 GN=pckG PE=3 SV=1
+	4.43371	0.863062	N0E3D7	28.1391	28.2098	28.208	28.1655	27.4865	27.1768	27.1939	27.413		70.025	1889100000	64		tr|N0E3D7|N0E3D7_9MICO Uncharacterized protein OS=Tetrasphaera elongata Lp2 GN=BN10_920037 PE=4 SV=1
+	1.98675	0.862038	N0E198	26.0079	25.6472	26.4093	25.9204	25.3966	24.768	25.461	24.9111		46.057	378410000	35		tr|N0E198|N0E198_9MICO UPF0182 protein BN10_190001 OS=Tetrasphaera elongata Lp2 GN=BN10_190001 PE=3 SV=1
+	3.32345	0.805528	N0DYH5	29.508	29.1822	29.5061	29.3582	28.8126	28.4521	28.4352	28.6325		323.31	4314500000	142		tr|N0DYH5|N0DYH5_9MICO Ribose ABC transporter (ATP-binding protein) OS=Tetrasphaera elongata Lp2 GN=rbsA PE=3 SV=1
+	2.31775	0.778687	N0DXS6	26.1328	25.5927	26.2541	25.8341	25.4531	25.1384	24.986	25.1214		55.835	383990000	16		tr|N0DXS6|N0DXS6_9MICO Glycosyl transferase family 2 OS=Tetrasphaera elongata Lp2 GN=BN10_1120008 PE=4 SV=1
+	2.52547	0.745439	N0DZS0	27.2289	26.9184	27.4824	27.2021	26.1984	26.5116	26.7	26.44		95.257	1080200000	43		tr|N0DZS0|N0DZS0_9MICO N-acetylglucosamine-6-phosphate deacetylase OS=Tetrasphaera elongata Lp2 GN=BN10_50019 PE=4 SV=1
+	4.84886	0.732509	N0DYB9	30.3796	30.4084	30.6001	30.3597	29.7192	29.6614	29.7315	29.7057		323.31	8662400000	197		tr|N0DYB9|N0DYB9_9MICO Deoxyribose-phosphate aldolase OS=Tetrasphaera elongata Lp2 GN=deoC PE=3 SV=1
+	2.1704	0.708545	N0DZU0	26.9889	26.6175	26.9542	26.6954	26.4222	25.7543	26.2654	25.9798		46.353	743380000	38		tr|N0DZU0|N0DZU0_9MICO ABC transporter related protein OS=Tetrasphaera elongata Lp2 GN=BN10_520059 PE=4 SV=1
+	2.00522	0.698938	N0DXI0	26.9096	26.9783	27.6421	27.3966	26.5713	26.3245	26.6433	26.5918		29.236	959320000	22		tr|N0DXI0|N0DXI0_9MICO Cobalt transport protein CbiN OS=Tetrasphaera elongata Lp2 GN=cbiN PE=3 SV=1
+	2.18807	0.69689	N0E0Z1	32.4515	32.1015	32.5841	32.1284	31.7634	31.3503	31.8786	31.4856		323.31	32785000000	513		tr|N0E0Z1|N0E0Z1_9MICO Uncharacterized protein OS=Tetrasphaera elongata Lp2 GN=BN10_1640002 PE=4 SV=1
+	2.36648	0.696546	N0DYH1	29.1924	28.9098	29.2275	28.7789	28.507	28.0071	28.4479	28.3604		235.91	3392500000	100		tr|N0DYH1|N0DYH1_9MICO RNA polymerase sigma-E factor OS=Tetrasphaera elongata Lp2 GN=rpoE PE=4 SV=1
+	2.55544	0.695202	N0DY12	27.1508	26.8336	27.3063	26.9877	26.3011	26.2339	26.2928	26.6699		69.112	898170000	31		tr|N0DY12|N0DY12_9MICO Putative hydrolase OS=Tetrasphaera elongata Lp2 GN=BN10_1270010 PE=4 SV=1
+	1.89239	0.675819	N0E355	27.706	27.3822	27.7744	27.4883	27.0885	26.4533	27.2332	26.8726		62.775	1241900000	38		tr|N0E355|N0E355_9MICO Threonine dehydratase OS=Tetrasphaera elongata Lp2 GN=tdc PE=4 SV=1
+	3.4593	0.673944	N0E076	29.395	29.1863	29.4529	29.3033	28.8675	28.5352	28.5984	28.6407		323.31	4247200000	184		tr|N0E076|N0E076_9MICO Methylmalonyl-CoA mutase, large subunit, alpha subunit OS=Tetrasphaera elongata Lp2 GN=mutB PE=4 SV=1
+	2.15887	0.673098	N0E4G8	28.7568	28.4129	28.5946	28.4008	28.0114	27.437	28.0476	27.9767		42.173	2367100000	29		tr|N0E4G8|N0E4G8_9MICO Isoleucyl-tRNA synthetase OS=Tetrasphaera elongata Lp2 GN=BN10_670001 PE=4 SV=1
+	3.52762	0.634011	N0E2U5	31.6847	31.458	31.7392	31.5981	31.147	30.9552	30.9753	30.8664		323.31	20035000000	386		tr|N0E2U5|N0E2U5_9MICO 4-hydroxyphenylpyruvate dioxygenase OS=Tetrasphaera elongata Lp2 GN=hpd PE=3 SV=1
+	2.82814	0.620868	N0DZL1	27.8121	27.6308	27.8333	27.56	27.2625	27.1114	27.1426	26.8363		92.514	1413000000	38		tr|N0DZL1|N0DZL1_9MICO NADH-quinone oxidoreductase subunit D OS=Tetrasphaera elongata Lp2 GN=nuoD PE=3 SV=1
+	2.06404	0.609433	N0DY14	26.9629	27.0196	26.8358	26.7966	26.424	26.3706	26.5278	25.8548		72.355	790940000	38		tr|N0DY14|N0DY14_9MICO Putative Asparagine synthetase (Glutamine-hydrolyzing) 1 OS=Tetrasphaera elongata Lp2 GN=BN10_1320022 PE=4 SV=1
+	1.83988	0.607522	N0E4A9	28.3109	28.8973	28.4782	28.9009	28.2808	27.9737	28.0855	27.8172		84.693	2595500000	85		tr|N0E4A9|N0E4A9_9MICO Cytochrome caa3 oxidase (Subunit I) OS=Tetrasphaera elongata Lp2 GN=ctaD PE=3 SV=1
+	2.15622	0.606682	N0E5U4	29.3303	28.982	29.5195	29.1693	28.7849	28.4888	28.8404	28.4603		161.71	3782000000	113		tr|N0E5U4|N0E5U4_9MICO Trk system potassium uptake protein trkA OS=Tetrasphaera elongata Lp2 GN=trkA PE=4 SV=1
+	1.78719	0.60334	N0E1W7	26.5983	26.4421	26.5034	26.004	25.6223	25.5295	26.0787	25.9039		15.807	493520000	16		tr|N0E1W7|N0E1W7_9MICO Carboxylesterase Est2 OS=Tetrasphaera elongata Lp2 GN=lipN PE=4 SV=1
+	3.62583	0.602142	N0E2K3	31.8227	31.6232	31.8568	31.6932	31.3013	31.0447	31.1127	31.1286		323.31	22776000000	541		tr|N0E2K3|N0E2K3_9MICO Putative Methylmalonyl-CoA mutase OS=Tetrasphaera elongata Lp2 GN=BN10_460061 PE=4 SV=1
+	4.20259	0.600595	N0E072	32.7093	32.6803	32.6659	32.5775	32.1873	32.0966	31.9395	32.0073		323.31	41732000000	750		tr|N0E072|N0E072_9MICO L-lysine 2,3-aminomutase OS=Tetrasphaera elongata Lp2 GN=BN10_560041 PE=4 SV=1
+	3.46344	0.582479	N0DZD9	27.2325	27.2093	27.4597	27.1819	26.6874	26.5805	26.8154	26.6702		115	963690000	47		tr|N0DZD9|N0DZD9_9MICO DNA integrity scanning protein DisA OS=Tetrasphaera elongata Lp2 GN=disA PE=3 SV=1
+	2.23106	0.556425	N0E4P3	28.1723	27.7574	27.8858	27.7329	27.3191	27.1008	27.5204	27.3824		172.07	1499000000	50		tr|N0E4P3|N0E4P3_9MICO Chaperone protein DnaJ OS=Tetrasphaera elongata Lp2 GN=dnaJ PE=3 SV=1
+	4.06795	0.553397	N0E426	29.2504	29.1497	29.238	29.1331	28.7315	28.6028	28.5117	28.7116		223.77	3790800000	134		tr|N0E426|N0E426_9MICO Elongation factor G-like protein OS=Tetrasphaera elongata Lp2 GN=BN10_590072 PE=4 SV=1
+	3.38955	0.552111	N0DZG0	27.4318	27.2544	27.5849	27.393	26.7518	26.9242	26.9076	26.8721		114.61	1150000000	66		tr|N0DZG0|N0DZG0_9MICO Carbon monoxide dehydrogenase medium chain OS=Tetrasphaera elongata Lp2 GN=cutM PE=4 SV=1
+	1.76814	0.546901	N0E1F1	27.2728	26.8005	26.828	26.7889	26.5008	26.0179	26.4722	26.5117		97.759	801290000	37		tr|N0E1F1|N0E1F1_9MICO Phosphatase yfbT OS=Tetrasphaera elongata Lp2 GN=yfbT PE=4 SV=1
+	2.86057	0.544532	N0DXF3	32.7504	32.6866	32.8076	32.7276	32.0989	32.075	32.1432	32.4769		323.31	44704000000	509		tr|N0DXF3|N0DXF3_9MICO Triosephosphate isomerase OS=Tetrasphaera elongata Lp2 GN=tpiA PE=3 SV=1
+	1.9185	0.532733	N0E610	27.8187	27.4076	27.9293	27.7197	27.276	27.0181	27.4248	27.0256		109.94	1404300000	67		tr|N0E610|N0E610_9MICO Uncharacterized protein OS=Tetrasphaera elongata Lp2 GN=BN10_690028 PE=4 SV=1
+	2.12814	0.514613	N0E046	28.585	28.2933	28.7669	28.3496	28.1171	27.9719	27.794	28.0532		125.09	2323600000	72		tr|N0E046|N0E046_9MICO Tyrosine--tRNA ligase OS=Tetrasphaera elongata Lp2 GN=tyrS PE=3 SV=1
+	2.11146	0.500819	N0E5S2	30.2838	30.1221	30.0401	30.087	29.9222	29.3943	29.7054	29.5079		323.31	7433800000	277		tr|N0E5S2|N0E5S2_9MICO Carbamoyl-phosphate synthase large chain OS=Tetrasphaera elongata Lp2 GN=pyrAB PE=3 SV=1
+	1.79583	0.488829	N0E1W8	25.9354	26.0054	26.1637	26.2517	25.4632	25.8745	25.7484	25.3147		53.531	420890000	25		tr|N0E1W8|N0E1W8_9MICO ABC transporter, ATP-binding/permease protein OS=Tetrasphaera elongata Lp2 GN=BN10_720037 PE=3 SV=1
+	1.91904	0.485088	N0E3J0	29.1359	28.849	29.4101	29.0399	28.5132	28.5151	28.6553	28.811		181.58	3840000000	110		tr|N0E3J0|N0E3J0_9MICO ATP-dependent Clp protease proteolytic subunit OS=Tetrasphaera elongata Lp2 GN=clpP PE=3 SV=1
+	2.91703	0.4847	N0E4U7	27.9631	27.6307	27.8612	27.7106	27.2147	27.3663	27.2673	27.3786		115.18	1449800000	54		tr|N0E4U7|N0E4U7_9MICO Protein-tyrosine kinase OS=Tetrasphaera elongata Lp2 GN=BN10_720035 PE=4 SV=1
+	2.05161	0.481125	N0E1G9	31.514	31.2544	31.611	31.337	30.9602	30.6976	31.1696	30.9646		323.31	18204000000	359		tr|N0E1G9|N0E1G9_9MICO ATP synthase gamma chain OS=Tetrasphaera elongata Lp2 GN=atpG PE=3 SV=1
+	2.49329	0.479702	N0E3G9	30.9539	30.8831	30.9795	30.8469	30.4882	30.419	30.6514	30.186		323.31	13114000000	301		tr|N0E3G9|N0E3G9_9MICO Dihydroorotase OS=Tetrasphaera elongata Lp2 GN=pyrC PE=3 SV=1
+	1.7943	0.47889	N0E1S1	32.1048	31.8976	32.2023	32.0012	31.798	31.6684	31.6202	31.2038		323.31	27754000000	273		tr|N0E1S1|N0E1S1_9MICO 30S ribosomal protein S20 OS=Tetrasphaera elongata Lp2 GN=rpsT PE=3 SV=1
+	4.47412	0.473354	N0DZR6	30.6285	30.4667	30.5423	30.4428	30.0324	30.0462	30.0747	30.0335		323.31	10240000000	268		tr|N0DZR6|N0DZR6_9MICO Pyruvate dehydrogenase E1 component subunit alpha (Lipoamide) OS=Tetrasphaera elongata Lp2 GN=pdhA PE=4 SV=1
+	2.05288	0.468802	N0E682	29.0589	28.8981	29.2706	28.8585	28.7279	28.3436	28.5437	28.5958		213.3	3601500000	110		tr|N0E682|N0E682_9MICO Glucosamine--fructose-6-phosphate aminotransferase (Isomerizing) OS=Tetrasphaera elongata Lp2 GN=BN10_780026 PE=4 SV=1
+	4.16384	0.460378	N0E2U8	29.3677	29.2282	29.2863	29.2823	28.8289	28.9361	28.7617	28.7963		253.53	4120600000	131		tr|N0E2U8|N0E2U8_9MICO Pyruvate dehydrogenase,dihydrolipoyltransacetylase component E2 (Dihydrolipoyllysine-residue acetyltransferase component of pyruvate dehydrogenase complex) OS=Tetrasphaera elongata Lp2 GN=pdhC PE=3 SV=1
+	2.13449	0.456079	N0E102	34.0804	34.0495	34.2899	34.146	33.989	33.5979	33.5587	33.5961		323.31	121440000000	898		tr|N0E102|N0E102_9MICO Multiple sugar-binding periplasmic receptor ChvE OS=Tetrasphaera elongata Lp2 GN=chvE PE=4 SV=1
+	2.02	0.453278	N0E4Z1	33.6621	33.5429	33.7412	33.5808	33.0603	33.4713	33.2278	32.9546		323.31	81961000000	1023		tr|N0E4Z1|N0E4Z1_9MICO 30S ribosomal protein S3 OS=Tetrasphaera elongata Lp2 GN=rpsC PE=3 SV=1
+	2.11885	0.452096	N0DZH4	28.0203	27.8914	28.1355	27.9344	27.8058	27.3574	27.5963	27.4138		158.32	1781800000	72		tr|N0DZH4|N0DZH4_9MICO Putative aldehyde dehydrogenase dhaS OS=Tetrasphaera elongata Lp2 GN=BN10_1190008 PE=4 SV=1
+	2.1528	0.451957	N0E684	30.4437	30.0405	30.3595	30.0196	29.785	29.8374	29.7271	29.706		323.31	7460900000	224		tr|N0E684|N0E684_9MICO Uncharacterized protein OS=Tetrasphaera elongata Lp2 GN=BN10_800003 PE=4 SV=1
+	3.0327	0.443029	N0DXM1	32.7359	32.9266	32.8148	32.8005	32.2849	32.2609	32.515	32.4449		323.31	48271000000	400		tr|N0DXM1|N0DXM1_9MICO 50S ribosomal protein L20 OS=Tetrasphaera elongata Lp2 GN=rplT PE=3 SV=1
+	1.7778	0.439423	N0E3A2	29.5607	29.4401	29.5988	29.2857	29.0814	29.023	28.7364	29.2868		302.31	4929000000	140		tr|N0E3A2|N0E3A2_9MICO Lysophospholipase L2 OS=Tetrasphaera elongata Lp2 GN=BN10_540010 PE=4 SV=1
+	1.93728	0.423485	N0E0P9	27.5936	27.6085	27.7116	27.4201	27.2627	26.8693	27.3273	27.1806		124.33	1270300000	50		tr|N0E0P9|N0E0P9_9MICO Kynureninase OS=Tetrasphaera elongata Lp2 GN=kynU PE=3 SV=1
+	2.21436	0.41933	N0E1Q4	29.8092	29.706	29.7712	29.6499	29.2897	29.074	29.3626	29.5328		254.47	5524200000	113		tr|N0E1Q4|N0E1Q4_9MICO Uncharacterized protein OS=Tetrasphaera elongata Lp2 GN=BN10_300037 PE=4 SV=1
+	3.21297	0.418674	N0E2P2	29.2058	29.162	29.1359	29.253	28.8213	28.8962	28.7429	28.6216		265.75	3926600000	153		tr|N0E2P2|N0E2P2_9MICO Pyruvate dehydrogenase E1 component subunit beta OS=Tetrasphaera elongata Lp2 GN=pdhB PE=4 SV=1
+	2.24011	0.418058	N0E612	30.724	30.6337	30.9629	30.7045	30.4859	30.1763	30.4158	30.275		323.31	11959000000	344		tr|N0E612|N0E612_9MICO Inorganic pyrophosphatase OS=Tetrasphaera elongata Lp2 GN=ppa PE=3 SV=1
+	3.45456	0.417373	N0E336	33.1275	33.2266	33.3019	33.2345	32.6792	32.8742	32.866	32.8016		323.31	63597000000	941		tr|N0E336|N0E336_9MICO Adenosylhomocysteinase OS=Tetrasphaera elongata Lp2 GN=ahcY PE=3 SV=1
+	1.92545	0.416315	N0E1D2	33.6848	33.7314	33.9994	33.6668	33.2784	33.1491	33.5413	33.4484		323.31	93448000000	610		tr|N0E1D2|N0E1D2_9MICO Fructose-bisphosphate aldolase OS=Tetrasphaera elongata Lp2 GN=fba PE=4 SV=1
+	1.9875	0.395913	N0E2N8	29.5146	29.7604	29.4671	29.7312	29.4269	29.2027	29.2101	29.05		119.6	5256400000	67		tr|N0E2N8|N0E2N8_9MICO NADH-quinone oxidoreductase subunit B OS=Tetrasphaera elongata Lp2 GN=nuoB PE=3 SV=1
+	2.10697	0.394299	N0DYG9	32.9694	32.6313	33.0629	32.7465	32.4745	32.4856	32.463	32.4098		323.31	49180000000	639		tr|N0DYG9|N0DYG9_9MICO 30S ribosomal protein S2 OS=Tetrasphaera elongata Lp2 GN=rpsB PE=3 SV=1
+	2.16018	0.390982	N0DYZ5	26.978	26.9474	26.8894	27.1631	26.7918	26.4383	26.6561	26.5277		92.352	859700000	35		tr|N0DYZ5|N0DYZ5_9MICO RNA polymerase sigma factor SigA OS=Tetrasphaera elongata Lp2 GN=hrdB PE=3 SV=1
+	3.40949	0.390471	N0E1C1	32.1028	32.2577	32.1808	32.1992	31.9109	31.7675	31.6966	31.8036		323.31	29967000000	630		tr|N0E1C1|N0E1C1_9MICO Succinate dehydrogenase flavoprotein subunit SdhA OS=Tetrasphaera elongata Lp2 GN=sdhA PE=4 SV=1
+	1.88897	0.388027	N0DZY9	30.1253	29.6632	29.8297	29.837	29.5015	29.5623	29.3124	29.5269		163.02	5919700000	147		tr|N0DZY9|N0DZY9_9MICO Dimethyladenosine transferase (RRNA methylation) OS=Tetrasphaera elongata Lp2 GN=BN10_1280004 PE=4 SV=1
+	3.70273	0.368401	N0E127	34.3237	34.2639	34.3476	34.2017	33.9118	33.87	33.8735	34.008		323.31	130010000000	652		tr|N0E127|N0E127_9MICO Peptidyl-prolyl cis-trans isomerase OS=Tetrasphaera elongata Lp2 GN=ppiA PE=3 SV=1
+	1.97607	0.36658	N0E4L9	29.7888	29.5956	30.023	29.6796	29.411	29.3106	29.4968	29.4023		233.15	5925300000	131		tr|N0E4L9|N0E4L9_9MICO Dehydrogenase/reductase SDR family member 4 OS=Tetrasphaera elongata Lp2 GN=DHRS PE=4 SV=1
+	1.79335	0.36391	N0DZA8	29.3246	29.0132	29.4499	29.1291	28.9916	28.807	28.8961	28.7665		165.97	4183000000	89		tr|N0DZA8|N0DZA8_9MICO Bifunctional purine biosynthesis protein purH OS=Tetrasphaera elongata Lp2 GN=BN10_430008 PE=4 SV=1
+	3.5082	0.362251	N0E1A8	34.362	34.2068	34.3501	34.2671	33.9246	34.0089	33.9509	33.8526		323.31	137450000000	1732		tr|N0E1A8|N0E1A8_9MICO Pyruvate dehydrogenase E1 component OS=Tetrasphaera elongata Lp2 GN=aceE PE=4 SV=1
+	2.44238	0.361097	N0DXL5	31.3866	31.4017	31.1045	31.3429	30.9953	30.9575	30.8427	30.9957		323.31	16863000000	380		tr|N0DXL5|N0DXL5_9MICO Putative polyphosphate kinase 2 (Ppk2) OS=Tetrasphaera elongata Lp2 GN=BN10_120015 PE=4 SV=1
+	2.15322	0.358896	N0E248	30.6376	30.4115	30.5244	30.5954	30.2367	30.1029	30.028	30.3658		323.31	10306000000	179		tr|N0E248|N0E248_9MICO Putative O-methyltransferase MUL_4520 OS=Tetrasphaera elongata Lp2 GN=BN10_130003 PE=4 SV=1
+	2.25806	0.358073	N0DY77	27.3995	27.3966	27.4263	27.1121	27.0184	26.9515	27.0598	26.8724		165.73	1171000000	45		tr|N0DY77|N0DY77_9MICO Putative two-component regulatory system (Putative response regulator-phoR) OS=Tetrasphaera elongata Lp2 GN=BN10_1400001 PE=4 SV=1
+	1.76981	0.356141	N0E4F6	31.5579	31.2175	31.6797	31.4937	31.2183	31.1663	31.1441	30.9957		323.31	20101000000	364		tr|N0E4F6|N0E4F6_9MICO Uncharacterized protein OS=Tetrasphaera elongata Lp2 GN=BN10_650023 PE=4 SV=1
+	2.06501	0.350137	N0E033	29.8921	30.041	29.7858	29.9982	29.6909	29.4149	29.5054	29.7053		323.31	6532300000	219		tr|N0E033|N0E033_9MICO Methylmalonyl-CoA mutase small subunit (Beta subunit) OS=Tetrasphaera elongata Lp2 GN=mutA PE=4 SV=1
+	2.61515	0.347105	N0DXW5	29.9995	29.9537	30.1603	29.9285	29.7719	29.7052	29.5775	29.5989		323.31	6956100000	217		tr|N0DXW5|N0DXW5_9MICO Fumarate hydratase (Fumarase A), aerobic Class I OS=Tetrasphaera elongata Lp2 GN=fumA PE=4 SV=1
+	2.26667	0.340592	N0E2R6	26.9974	26.942	27.2341	27.153	26.6498	26.7	26.7647	26.8496		80.739	930010000	33		tr|N0E2R6|N0E2R6_9MICO Putative dehydrogenase (Putative aldehyde dehydrogenase) OS=Tetrasphaera elongata Lp2 GN=BN10_840022 PE=3 SV=1
+	2.13423	0.333824	N0E3Y8	33.1134	32.8505	33.1005	32.9005	32.5134	32.6817	32.7429	32.6916		323.31	56271000000	913		tr|N0E3Y8|N0E3Y8_9MICO Glycine dehydrogenase (decarboxylating) OS=Tetrasphaera elongata Lp2 GN=gcvP PE=3 SV=1
+	1.80532	0.330425	N0E5G1	30.143	30.0225	30.3063	29.9709	29.6261	29.945	29.7712	29.7786		270.47	7483200000	174		tr|N0E5G1|N0E5G1_9MICO Malonyl CoA-acyl carrier protein transacylase OS=Tetrasphaera elongata Lp2 GN=fabD PE=4 SV=1
+	2.51189	0.328681	N0DYH4	30.0975	29.9344	30.0812	29.863	29.7219	29.7199	29.662	29.5575		323.31	6849100000	187		tr|N0DYH4|N0DYH4_9MICO 4-hydroxy-3-methylbut-2-en-1-yl diphosphate synthase (flavodoxin) OS=Tetrasphaera elongata Lp2 GN=ispG PE=3 SV=1
+	2.01549	0.323503	N0DYX9	30.523	30.2789	30.5047	30.3801	29.928	30.2443	30.1064	30.1138		323.31	8955000000	247		tr|N0DYX9|N0DYX9_9MICO Putative dehydrogenase OS=Tetrasphaera elongata Lp2 GN=adhA PE=3 SV=1
+	2.37439	0.317995	N0E270	30.6614	30.5165	30.6277	30.4695	30.322	30.0882	30.3092	30.2837		323.31	10504000000	270		tr|N0E270|N0E270_9MICO GTP-binding protein TypA/BipA homolog OS=Tetrasphaera elongata Lp2 GN=typA PE=4 SV=1
+	1.91323	0.317405	N0DYK5	30.3772	30.5697	30.3724	30.5151	30.317	29.9519	30.1487	30.1473		323.31	9453600000	240		tr|N0DYK5|N0DYK5_9MICO Uncharacterized protein OS=Tetrasphaera elongata Lp2 GN=BN10_230021 PE=4 SV=1
+	1.87726	0.315633	N0E1Z7	27.4209	27.523	27.4694	27.608	27.2781	26.9455	27.2795	27.2557		182.95	1296200000	57		tr|N0E1Z7|N0E1Z7_9MICO UDP-N-acetylmuramoylalanine--D-glutamate ligase OS=Tetrasphaera elongata Lp2 GN=murD PE=3 SV=1
+	2.01318	0.311383	N0DYY7	27.9484	27.8606	27.7285	27.7005	27.6012	27.4028	27.6024	27.3861		83.648	1537900000	53		tr|N0DYY7|N0DYY7_9MICO Uncharacterized protein OS=Tetrasphaera elongata Lp2 GN=BN10_1060027 PE=4 SV=1
+	1.76571	0.309661	N0DYK4	27.2083	26.8285	27.0472	26.9924	26.6992	26.6787	26.8572	26.6026		94.782	843350000	45		tr|N0DYK4|N0DYK4_9MICO Putative transpeptidase OS=Tetrasphaera elongata Lp2 GN=BN10_1710007 PE=4 SV=1
+	2.49874	0.306424	N0E4F0	32.2248	32.0948	32.2887	32.2847	31.7968	32.0179	31.9444	31.9082		323.31	32525000000	659		tr|N0E4F0|N0E4F0_9MICO Putative carboxylase (CARBOXYLASE:PYRUVATE/ACETYL-COA/PROPIONYL-COA CARBOXYLASE) OS=Tetrasphaera elongata Lp2 GN=BN10_420010 PE=4 SV=1
+	2.97101	0.2811	N0DYX8	30.5085	30.4046	30.5499	30.4134	30.1188	30.2229	30.153	30.2573		257.85	9522000000	139		tr|N0DYX8|N0DYX8_9MICO Dihydrolipoyllysine-residue succinyltransferase component of 2-oxoglutarate dehydrogenase complex (SucB) OS=Tetrasphaera elongata Lp2 GN=BN10_300104 PE=3 SV=1
+	1.86233	0.274995	N0E0N1	30.6235	30.3436	30.5213	30.3532	30.2126	30.1094	30.2915	30.1282		323.31	9558100000	214		tr|N0E0N1|N0E0N1_9MICO Uncharacterized protein OS=Tetrasphaera elongata Lp2 GN=BN10_590050 PE=4 SV=1
+	2.32512	0.274143	N0E4Z9	36.1551	36.1501	36.0462	36.1444	35.973	35.8899	35.7009	35.8354		323.31	493670000000	2362		tr|N0E4Z9|N0E4Z9_9MICO Elongation factor Tu OS=Tetrasphaera elongata Lp2 GN=tufA PE=3 SV=1
+	2.13107	0.252245	N0E2F1	33.593	33.5489	33.5309	33.3496	33.2503	33.2995	33.1578	33.3058		323.31	80339000000	1541		tr|N0E2F1|N0E2F1_9MICO DNA-directed RNA polymerase subunit beta OS=Tetrasphaera elongata Lp2 GN=rpoC PE=3 SV=1
+	1.92415	0.246881	N0E0B7;N0E3N7	33.035	32.846	33.0325	32.8723	32.5581	32.7431	32.7568	32.7402		323.31	53118000000	560		tr|N0E0B7|N0E0B7_9MICO S-adenosylmethionine synthase OS=Tetrasphaera elongata Lp2 GN=metK PE=3 SV=1;tr|N0E3N7|N0E3N7_9MICO S-adenosylmethionine synthase OS=Tetrasphaera elongata Lp2 GN=metK PE=3 SV=1
+	2.21275	0.24608	N0E5X2	30.3588	30.2676	30.425	30.2803	30.103	29.9747	30.2016	30.068		275.41	9094000000	222		tr|N0E5X2|N0E5X2_9MICO Phosphoribosylaminoimidazole-succinocarboxamide synthase OS=Tetrasphaera elongata Lp2 GN=purC PE=3 SV=1
+	1.88035	0.24132	N0E4F7	28.5314	28.3023	28.4112	28.3185	28.2801	28.1186	28.072	28.1274		226	2346300000	85		tr|N0E4F7|N0E4F7_9MICO Phosphoribosylformylglycinamidine cyclo-ligase OS=Tetrasphaera elongata Lp2 GN=purM PE=3 SV=1
+	1.87556	0.24036	N0E302	30.2286	29.9913	30.1123	29.997	29.8427	29.8267	29.9477	29.7507		323.31	7569100000	195		tr|N0E302|N0E302_9MICO Tryptophan--tRNA ligase OS=Tetrasphaera elongata Lp2 GN=trpS PE=3 SV=1
+	1.77051	0.235888	N0DXZ5	28.9056	28.836	28.6645	28.7844	28.5889	28.6656	28.571	28.4214		48.817	3191000000	29		tr|N0DXZ5|N0DXZ5_9MICO DNA repair protein RecN OS=Tetrasphaera elongata Lp2 GN=recN PE=3 SV=1
+	1.91376	0.23135	N0E249	30.9271	30.7311	30.9333	30.7149	30.5836	30.5401	30.6655	30.5917		323.31	12426000000	286		tr|N0E249|N0E249_9MICO Pyridoxal kinase OS=Tetrasphaera elongata Lp2 GN=pdxY PE=4 SV=1
+	1.98118	0.227834	N0E6A4	30.0967	29.9964	30.0186	30.0793	29.9375	29.6895	29.8913	29.7614		207.51	7286000000	173		tr|N0E6A4|N0E6A4_9MICO Uncharacterized protein OS=Tetrasphaera elongata Lp2 GN=BN10_820035 PE=4 SV=1
+	2.27229	0.227589	N0E1H9	30.5509	30.4888	30.6027	30.4318	30.3688	30.2418	30.2099	30.3433		323.31	10256000000	257		tr|N0E1H9|N0E1H9_9MICO Quinolinate synthase A OS=Tetrasphaera elongata Lp2 GN=nadA PE=3 SV=1
+	2.25612	0.204774	N0DXY8	30.948	30.9303	30.9989	30.9401	30.7507	30.7443	30.6389	30.8642		323.31	13647000000	363		tr|N0DXY8|N0DXY8_9MICO NADH:ubiquinone oxidoreductase, chain F OS=Tetrasphaera elongata Lp2 GN=nuoF PE=4 SV=1
+	2.23532	0.188214	N0E1C6	30.8434	30.9449	30.8026	30.8205	30.707	30.7248	30.5856	30.6413		323.31	12816000000	436		tr|N0E1C6|N0E1C6_9MICO Phosphoribosylformylglycinamidine synthase OS=Tetrasphaera elongata Lp2 GN=purL PE=3 SV=1
+	1.83218	0.185335	N0DYH6	30.0938	29.99	30.1836	30.0084	29.8182	29.8395	29.9408	29.9359		239.69	7397500000	190		tr|N0DYH6|N0DYH6_9MICO Glucose-1-phosphate thymidylyltransferase OS=Tetrasphaera elongata Lp2 GN=spsI PE=3 SV=1
+	2.38743	0.178862	N0E3S1	33.1593	33.0849	33.2063	33.1555	33.0386	32.9764	32.9859	32.8897		323.31	61605000000	581		tr|N0E3S1|N0E3S1_9MICO ABC-type glucosylglycerol transport system substrate-binding protein OS=Tetrasphaera elongata Lp2 GN=BN10_990012 PE=4 SV=1
+	2.09929	0.172693	N0DY03	31.7181	31.6016	31.7132	31.7238	31.5789	31.5653	31.4419	31.4797		323.31	22525000000	401		tr|N0DY03|N0DY03_9MICO Valyl-tRNA synthetase OS=Tetrasphaera elongata Lp2 GN=BN10_1260001 PE=4 SV=1
+	2.53857	0.168192	N0DYI8	28.5215	28.4316	28.3922	28.4708	28.3097	28.3246	28.2288	28.2803		219.18	2524300000	108		tr|N0DYI8|N0DYI8_9MICO Uncharacterized protein OS=Tetrasphaera elongata Lp2 GN=BN10_20012 PE=4 SV=1
+	2.54558	0.166461	N0E285	33.1191	33.1019	33.049	33.0339	32.9562	32.8912	32.8397	32.9509		323.31	60140000000	1231		tr|N0E285|N0E285_9MICO DNA-directed RNA polymerase subunit beta OS=Tetrasphaera elongata Lp2 GN=rpoB PE=3 SV=1
+	1.76322	0.158047	N0E100	30.3434	30.269	30.3736	30.1702	30.0985	30.1075	30.1448	30.1732		323.31	8817300000	226		tr|N0E100|N0E100_9MICO Peptidase M20D, amidohydrolase OS=Tetrasphaera elongata Lp2 GN=BN10_1680002 PE=4 SV=1
+	2.33062	0.149883	N0DYW9	29.4434	29.3251	29.4419	29.4666	29.2363	29.2838	29.2923	29.2651		250.02	4929300000	158		tr|N0DYW9|N0DYW9_9MICO Histidinol dehydrogenase OS=Tetrasphaera elongata Lp2 GN=hisD PE=3 SV=1
+	1.83751	0.148228	N0DY20	30.1109	29.9851	30.1205	30.0833	29.946	30.0026	29.8973	29.8609		323.31	7905300000	196		tr|N0DY20|N0DY20_9MICO 2,3,4,5-tetrahydropyridine-2,6-dicarboxylate N-succinyltransferase OS=Tetrasphaera elongata Lp2 GN=dapD PE=3 SV=1
+	3.60361	0.14716	N0E393	31.1272	31.0902	31.0852	31.1571	30.9476	30.9655	30.967	30.9909		323.31	15575000000	470		tr|N0E393|N0E393_9MICO Valine--tRNA ligase OS=Tetrasphaera elongata Lp2 GN=valS PE=3 SV=1
+	3.00901	-0.12329	N0E1G2	30.9751	31.0467	31.0054	31.0473	31.1159	31.1561	31.1632	31.1325		323.31	15088000000	317		tr|N0E1G2|N0E1G2_9MICO Urocanate hydratase OS=Tetrasphaera elongata Lp2 GN=hutU PE=3 SV=1
+	2.08818	-0.13862	N0DXN5	28.5039	28.4281	28.5434	28.4255	28.5856	28.6326	28.5741	28.663		207.54	2732600000	75		tr|N0DXN5|N0DXN5_9MICO Uncharacterized LmbE-like protein OS=Tetrasphaera elongata Lp2 GN=BN10_1070022 PE=4 SV=1
+	2.14515	-0.165203	N0E544	33.941	33.9135	33.9368	33.9544	34.1277	34.2035	34.0237	34.0516		323.31	119020000000	1242		tr|N0E544|N0E544_9MICO Chaperone protein DnaK OS=Tetrasphaera elongata Lp2 GN=dnaK PE=2 SV=1
+	2.13467	-0.172911	N0DZV0	31.3354	31.3903	31.3159	31.3768	31.4948	31.6161	31.4339	31.5652		323.31	19462000000	265		tr|N0DZV0|N0DZV0_9MICO Bifunctional protein FolD OS=Tetrasphaera elongata Lp2 GN=folD PE=3 SV=1
+	2.56038	-0.194616	N0E2H7	30.2723	30.2087	30.1293	30.235	30.3509	30.4435	30.3733	30.4561		323.31	8981600000	269		tr|N0E2H7|N0E2H7_9MICO Putative aminopeptidase OS=Tetrasphaera elongata Lp2 GN=BN10_460031 PE=4 SV=1
+	2.06006	-0.202249	N0DYP1	32.5877	32.6996	32.539	32.6183	32.7593	32.9337	32.7675	32.7933		323.31	47163000000	868		tr|N0DYP1|N0DYP1_9MICO Aerobic cobaltochelatase subunit CobN OS=Tetrasphaera elongata Lp2 GN=cobN PE=4 SV=1
+	3.42987	-0.202576	N0E331	31.2646	31.3008	31.2737	31.2946	31.4544	31.5465	31.5142	31.4289		323.31	19250000000	481		tr|N0E331|N0E331_9MICO Pyruvate kinase OS=Tetrasphaera elongata Lp2 GN=pyk PE=3 SV=1
+	1.76814	-0.211483	N0E5U0	27.3777	27.6153	27.4578	27.5609	27.6747	27.8157	27.6464	27.7209		170.14	1510400000	78		tr|N0E5U0|N0E5U0_9MICO Uncharacterized protein OS=Tetrasphaera elongata Lp2 GN=BN10_970005 PE=4 SV=1
+	2.12254	-0.229357	N0E0A0	31.8853	31.8718	32.0305	31.865	32.1435	32.1772	32.2248	32.0246		323.31	29132000000	587		tr|N0E0A0|N0E0A0_9MICO Uncharacterized oxidoreductase MSMEG_1603 OS=Tetrasphaera elongata Lp2 GN=BN10_1320004 PE=3 SV=1
+	1.97511	-0.243817	N0E4L8	28.7411	28.7167	28.5923	28.7899	28.9068	29.0462	28.8305	29.0318		96.594	3299000000	105		tr|N0E4L8|N0E4L8_9MICO Putative dioxygenase OS=Tetrasphaera elongata Lp2 GN=BN10_680021 PE=4 SV=1
+	3.03921	-0.24439	N0E2Q9	25.9647	26.0332	26.0258	25.9637	26.1633	26.3332	26.2514	26.2172		37.62	507210000	16		tr|N0E2Q9|N0E2Q9_9MICO Putative sporulation transcription regulator WhiA OS=Tetrasphaera elongata Lp2 GN=whiA PE=3 SV=1
+	2.39116	-0.256354	N0DXP4	28.9689	29.1285	29.1288	29.1444	29.3541	29.239	29.4186	29.3844		188.5	4220000000	148		tr|N0DXP4|N0DXP4_9MICO Putative serine protease do-like OS=Tetrasphaera elongata Lp2 GN=BN10_1070042 PE=4 SV=1
+	2.00362	-0.257294	N0E4T2	29.0495	29.1613	28.8807	29.1024	29.3664	29.29	29.2167	29.3499		196.17	4318900000	164		tr|N0E4T2|N0E4T2_9MICO Glucose-6-phosphate 1-dehydrogenase OS=Tetrasphaera elongata Lp2 GN=zwf PE=3 SV=1
+	1.98226	-0.259627	N0E5N3	31.2703	31.3918	31.3498	31.4836	31.7721	31.6696	31.5305	31.5617		323.31	20000000000	380		tr|N0E5N3|N0E5N3_9MICO Putative 3-ketoacyl-CoA thiolase (Beta-ketothiolase) or Acetoacetyl-CoA thiolase OS=Tetrasphaera elongata Lp2 GN=BN10_920035 PE=3 SV=1
+	2.00304	-0.263965	N0E0M0	27.508	27.4309	27.442	27.4743	27.809	27.5216	27.7836	27.7969		108.15	1335500000	59		tr|N0E0M0|N0E0M0_9MICO Short chain dehydrogenase OS=Tetrasphaera elongata Lp2 GN=BN10_1460004 PE=4 SV=1
+	3.39935	-0.271198	N0E2M6	32.1204	32.2356	32.2633	32.2648	32.4694	32.5185	32.5248	32.4562		323.31	38621000000	643		tr|N0E2M6|N0E2M6_9MICO Ketol-acid reductoisomerase OS=Tetrasphaera elongata Lp2 GN=ilvC PE=3 SV=1
+	3.8059	-0.272265	N0E4W3	30.7222	30.7218	30.607	30.6803	30.9557	30.9048	30.9744	30.9854		323.31	12979000000	294		tr|N0E4W3|N0E4W3_9MICO Zn-ribbon protein-like protein OS=Tetrasphaera elongata Lp2 GN=BN10_730017 PE=4 SV=1
+	2.61079	-0.276184	N0E4Z2	28.6012	28.7123	28.556	28.654	28.9164	29.0226	28.874	28.8152		133.55	2930300000	108		tr|N0E4Z2|N0E4Z2_9MICO Non-canonical purine NTP pyrophosphatase OS=Tetrasphaera elongata Lp2 GN=BN10_520070 PE=3 SV=1
+	2.19098	-0.280987	N0E5A4	30.9356	31.0028	30.8262	30.9749	31.1994	31.3749	31.1064	31.1827		323.31	15416000000	301		tr|N0E5A4|N0E5A4_9MICO Fumarylacetoacetase OS=Tetrasphaera elongata Lp2 GN=FAH PE=4 SV=1
+	2.19164	-0.289698	N0E1Q7	29.1966	29.3616	29.4547	29.3221	29.5224	29.6753	29.7247	29.5713		278.36	5072400000	141		tr|N0E1Q7|N0E1Q7_9MICO 1,4-alpha-glucan branching enzyme OS=Tetrasphaera elongata Lp2 GN=BN10_120031 PE=4 SV=1
+	1.91375	-0.304073	N0E0Z0	31.9567	32.1436	31.8035	32.0767	32.3406	32.3726	32.3045	32.1791		323.31	32245000000	638		tr|N0E0Z0|N0E0Z0_9MICO Xaa-Pro aminopeptidase 1 OS=Tetrasphaera elongata Lp2 GN=pepPI PE=3 SV=1
+	2.54046	-0.307036	N0E5S0	31.3155	31.0266	31.2306	31.1492	31.5098	31.4904	31.4427	31.507		323.31	17871000000	276		tr|N0E5S0|N0E5S0_9MICO Trigger factor OS=Tetrasphaera elongata Lp2 GN=tig PE=3 SV=1
+	1.77758	-0.307908	N0E615	27.5283	27.7589	27.3876	27.58	27.7836	27.835	27.8395	28.0284		213.71	1481600000	56		tr|N0E615|N0E615_9MICO Prephenate dehydratase OS=Tetrasphaera elongata Lp2 GN=pheA PE=4 SV=1
+	2.6328	-0.308558	N0E0I7	30.9705	31.0607	31.1972	31.0764	31.4813	31.4029	31.2922	31.3626		323.31	18202000000	453		tr|N0E0I7|N0E0I7_9MICO Basic membrane lipoprotein OS=Tetrasphaera elongata Lp2 GN=BN10_10026 PE=4 SV=1
+	1.93836	-0.328773	N0E0G6	27.5033	27.843	27.6515	27.8186	28.0343	27.9369	28.0042	28.1562		111.63	1615400000	55		tr|N0E0G6|N0E0G6_9MICO Threonine 3-dehydrogenase OS=Tetrasphaera elongata Lp2 GN=tdh PE=3 SV=1
+	1.80465	-0.328999	N0E3E1	29.1898	29.0271	28.7398	28.9126	29.2455	29.3557	29.2552	29.3288		272.96	3793900000	111		tr|N0E3E1|N0E3E1_9MICO Peptide methionine sulfoxide reductase MsrA OS=Tetrasphaera elongata Lp2 GN=msrA PE=3 SV=1
+	2.86494	-0.333436	N0E166	28.4344	28.6463	28.4337	28.5789	28.8455	28.9166	28.7919	28.8731		114.24	2997700000	82		tr|N0E166|N0E166_9MICO Uncharacterized protein OS=Tetrasphaera elongata Lp2 GN=BN10_190002 PE=4 SV=1
+	2.15723	-0.333527	N0E1K0	28.6013	28.5416	28.8352	28.6824	28.9779	29.1493	28.8984	28.969		172.43	3423300000	88		tr|N0E1K0|N0E1K0_9MICO Putative thioredoxin OS=Tetrasphaera elongata Lp2 GN=BN10_1170005 PE=4 SV=1
+	1.90298	-0.338515	N0E252	27.1963	27.5567	27.3091	27.5603	27.6618	27.7605	27.7471	27.8072		128.52	1304700000	75		tr|N0E252|N0E252_9MICO Uncharacterized protein OS=Tetrasphaera elongata Lp2 GN=BN10_310013 PE=4 SV=1
+	1.93567	-0.339266	N0E1Z0	30.3829	30.4471	30.3474	30.5324	30.6319	31.0171	30.6983	30.7196		323.31	10546000000	230		tr|N0E1Z0|N0E1Z0_9MICO Polyphosphate glucokinase OS=Tetrasphaera elongata Lp2 GN=ppgK PE=4 SV=1
+	2.85888	-0.341207	N0DXU2	30.0774	30.2066	30.164	30.2603	30.5586	30.6148	30.3935	30.5064		323.31	8894900000	288		tr|N0DXU2|N0DXU2_9MICO 4-alpha-glucanotransferase OS=Tetrasphaera elongata Lp2 GN=malQ PE=3 SV=1
+	2.89954	-0.341402	N0E5C8	30.5724	30.5114	30.4919	30.5296	30.8875	31.0223	30.7779	30.7832		323.31	11612000000	174		tr|N0E5C8|N0E5C8_9MICO Transcription termination/antitermination protein NusG OS=Tetrasphaera elongata Lp2 GN=nusG PE=3 SV=1
+	2.14057	-0.342139	N0E5Q4	35.0528	35.2213	35.1574	35.3399	35.5845	35.648	35.3623	35.545		323.31	283900000000	582		tr|N0E5Q4|N0E5Q4_9MICO Cold-shock protein OS=Tetrasphaera elongata Lp2 GN=cspC PE=4 SV=1
+	1.7627	-0.345146	N0E4W0	30.1812	30.2135	30.1096	30.0554	30.2113	30.6899	30.5111	30.528		323.31	8865500000	227		tr|N0E4W0|N0E4W0_9MICO 3-methyl-2-oxobutanoate hydroxymethyltransferase OS=Tetrasphaera elongata Lp2 GN=panB PE=3 SV=1
+	1.93573	-0.349883	N0DZI1	28.6144	28.8468	28.6621	28.5856	29.2142	28.9022	29.0973	28.8947		174.05	3278600000	105		tr|N0DZI1|N0DZI1_9MICO Activator of Hsp90 ATPase 1 family protein OS=Tetrasphaera elongata Lp2 GN=BN10_470012 PE=4 SV=1
+	2.33365	-0.363705	N0E057	26.8137	26.8452	26.7035	26.7218	27.2373	27.2643	26.9351	27.1024		85.395	818900000	34		tr|N0E057|N0E057_9MICO UTP--glucose-1-phosphate uridylyltransferase OS=Tetrasphaera elongata Lp2 GN=BN10_130079 PE=4 SV=1
+	1.76748	-0.364786	N0DYY3	31.8749	31.9671	31.8391	31.9347	32.3189	32.5496	32.0623	32.1441		323.31	30620000000	408		tr|N0DYY3|N0DYY3_9MICO 50S ribosomal protein L27 OS=Tetrasphaera elongata Lp2 GN=rpmA PE=3 SV=1
+	1.8222	-0.367756	N0E3R2	27.863	27.9766	27.7414	28.1197	28.3346	28.4757	28.228	28.1333		96.331	1915400000	78		tr|N0E3R2|N0E3R2_9MICO Peptidyl-prolyl cis-trans isomerase OS=Tetrasphaera elongata Lp2 GN=BN10_560053 PE=4 SV=1
+	2.67207	-0.374872	N0DXC7	28.9409	29.0809	28.8891	29.0054	29.4542	29.2046	29.3095	29.4475		205.47	4179400000	127		tr|N0DXC7|N0DXC7_9MICO Precorrin-8X methylmutase OS=Tetrasphaera elongata Lp2 GN=cobH PE=4 SV=1
+	1.96775	-0.378121	N0E5D7	26.069	25.9226	26.3565	26.142	26.486	26.3667	26.5436	26.6062		86.381	567200000	31		tr|N0E5D7|N0E5D7_9MICO Uncharacterized protein OS=Tetrasphaera elongata Lp2 GN=BN10_580024 PE=4 SV=1
+	1.93897	-0.379767	N0E3K1	27.9053	27.776	27.7577	27.9984	28.3093	28.3766	27.9768	28.2936		63.782	1893000000	43		tr|N0E3K1|N0E3K1_9MICO Uncharacterized protein OS=Tetrasphaera elongata Lp2 GN=BN10_990018 PE=4 SV=1
+	1.886	-0.384882	N0E241	27.081	27.245	27.1147	27.2314	27.578	27.8281	27.4485	27.357		62.146	1128600000	42		tr|N0E241|N0E241_9MICO Octanoyltransferase OS=Tetrasphaera elongata Lp2 GN=lipB PE=3 SV=1
+	2.17594	-0.390381	N0DZ09	28.2171	28.1427	27.9653	27.973	28.3296	28.6722	28.4293	28.4284		185.02	2085800000	72		tr|N0DZ09|N0DZ09_9MICO UDP-N-acetylmuramoyl-L-alanyl-D-glutamate--2,6-diaminopimelate ligase OS=Tetrasphaera elongata Lp2 GN=murE PE=3 SV=1
+	2.22292	-0.394237	N0E4Z4	33.6367	33.5455	33.3714	33.6022	33.9388	34.1372	33.791	33.8657		323.31	89719000000	412		tr|N0E4Z4|N0E4Z4_9MICO 50S ribosomal protein L4 OS=Tetrasphaera elongata Lp2 GN=rplD PE=3 SV=1
+	2.69079	-0.397228	N0DXJ6	31.9241	32.1596	32.1451	32.1614	32.4855	32.623	32.3784	32.4921		323.31	35831000000	649		tr|N0DXJ6|N0DXJ6_9MICO Putative alpha-glucosidase OS=Tetrasphaera elongata Lp2 GN=BN10_1160001 PE=4 SV=1
+	2.04382	-0.401868	N0E2D4	33.1316	33.3048	32.858	33.2618	33.6016	33.5945	33.4777	33.49		323.31	74318000000	555		tr|N0E2D4|N0E2D4_9MICO 50S ribosomal protein L3 OS=Tetrasphaera elongata Lp2 GN=rplC PE=3 SV=1
+	1.98824	-0.405726	N0E0E3	26.8894	27.3679	27.3086	27.2305	27.6039	27.6024	27.5428	27.6701		91.36	1285500000	52		tr|N0E0E3|N0E0E3_9MICO Uncharacterized protein OS=Tetrasphaera elongata Lp2 GN=BN10_140008 PE=4 SV=1
+	2.21529	-0.414095	N0E584	31.2706	31.1834	31.0958	31.4072	31.6025	31.8736	31.5383	31.5991		306.47	20172000000	436		tr|N0E584|N0E584_9MICO Peptidyl-prolyl cis-trans isomerase OS=Tetrasphaera elongata Lp2 GN=fkbP PE=4 SV=1
+	1.7977	-0.420425	N0E2S5	26.5293	26.2728	26.3794	26.1701	26.8027	26.831	26.4684	26.9313		107.4	680100000	22		tr|N0E2S5|N0E2S5_9MICO Aminotransferase family protein OS=Tetrasphaera elongata Lp2 GN=BN10_140001 PE=3 SV=1
+	2.92239	-0.426727	N0E2A5	29.236	29.3284	29.042	29.2202	29.5244	29.6814	29.6051	29.7225		215.6	4762500000	100		tr|N0E2A5|N0E2A5_9MICO NADPH-dependent FMN reductase OS=Tetrasphaera elongata Lp2 GN=BN10_130053 PE=4 SV=1
+	2.22318	-0.429586	N0DYY4	27.98	28.0109	28.3449	27.8959	28.4177	28.4667	28.5647	28.5009		143.52	2089900000	74		tr|N0DYY4|N0DYY4_9MICO Uncharacterized LmbE-like protein OS=Tetrasphaera elongata Lp2 GN=BN10_1070016 PE=4 SV=1
+	2.17836	-0.438575	N0E4F1	28.9173	29.0455	28.9976	28.9541	29.4571	29.696	29.2743	29.2413		260.02	4241400000	154		tr|N0E4F1|N0E4F1_9MICO Alpha-methylacyl-CoA racemase OS=Tetrasphaera elongata Lp2 GN=Amacr PE=4 SV=1
+	2.43496	-0.453309	N0E3U9	26.348	26.6682	26.6337	26.5271	26.9028	26.871	27.06	27.1563		59.896	782750000	35		tr|N0E3U9|N0E3U9_9MICO FadB4 OS=Tetrasphaera elongata Lp2 GN=BN10_230007 PE=4 SV=1
+	1.89056	-0.457489	N0E4X0	27.7487	27.963	27.6074	27.755	28.3667	28.4542	28.0652	28.018		160.83	1790200000	69		tr|N0E4X0|N0E4X0_9MICO Uncharacterized protein OS=Tetrasphaera elongata Lp2 GN=BN10_520035 PE=4 SV=1
+	2.51723	-0.463416	N0DXN0	26.5407	26.7764	26.3973	26.369	26.9437	27.0619	26.9629	26.9685		26.861	767540000	21		tr|N0DXN0|N0DXN0_9MICO Uncharacterized protein OS=Tetrasphaera elongata Lp2 GN=BN10_1070012 PE=4 SV=1
+	2.00666	-0.463771	N0DYV5	26.3658	26.8348	26.8697	26.8454	27.2595	27.1434	27.1456	27.2224		99.851	870100000	27		tr|N0DYV5|N0DYV5_9MICO Carbohydrate kinase, PfkB family protein OS=Tetrasphaera elongata Lp2 GN=BN10_30017 PE=4 SV=1
+	2.77175	-0.465897	N0E6E8	30.8262	30.6456	30.6854	30.7705	31.3582	31.2983	31.0641	31.0705		323.31	13832000000	213		tr|N0E6E8|N0E6E8_9MICO Transcription elongation factor GreA OS=Tetrasphaera elongata Lp2 GN=greA PE=3 SV=1
+	3.1111	-0.466669	N0DXQ9	27.3761	27.5527	27.4594	27.5898	27.8995	28.123	27.8661	27.956		89.625	1494000000	66		tr|N0DXQ9|N0DXQ9_9MICO 6-phosphogluconate dehydrogenase,decarboxylating OS=Tetrasphaera elongata Lp2 GN=BN10_1250016 PE=4 SV=1
+	1.98234	-0.468979	N0E3R5	26.5896	26.8075	26.2599	26.5303	27.1878	27.0065	26.922	26.9469		49.145	780290000	22		tr|N0E3R5|N0E3R5_9MICO DNA gyrase subunit B OS=Tetrasphaera elongata Lp2 GN=gyrB PE=3 SV=1
+	3.6147	-0.469396	N0E1A5	28.9003	28.9742	28.8316	28.9466	29.4449	29.4858	29.2544	29.3452		251.28	4062800000	159		tr|N0E1A5|N0E1A5_9MICO Acyl-CoA dehydrogenase domain protein OS=Tetrasphaera elongata Lp2 GN=BN10_230014 PE=3 SV=1
+	2.58708	-0.478032	N0DYF8	26.2043	26.3917	26.0995	25.9697	26.754	26.5987	26.5958	26.6288		31.693	662580000	49		tr|N0DYF8|N0DYF8_9MICO Uncharacterized protein OS=Tetrasphaera elongata Lp2 GN=BN10_1540002 PE=4 SV=1
+	2.54769	-0.479903	N0E5V3	29.1895	29.4506	29.2773	29.487	29.6893	29.9717	29.7384	29.9246		118.3	5279900000	106		tr|N0E5V3|N0E5V3_9MICO Antibiotic biosynthesis monooxygenase OS=Tetrasphaera elongata Lp2 GN=BN10_640024 PE=4 SV=1
+	3.29943	-0.480523	N0E4W1	29.2948	29.5328	29.3557	29.3533	29.8631	30.0026	29.8009	29.7922		307.54	5557000000	199		tr|N0E4W1|N0E4W1_9MICO Putative ribonuclease R OS=Tetrasphaera elongata Lp2 GN=BN10_730012 PE=4 SV=1
+	1.96217	-0.483283	N0E2N5	28.3463	28.4475	28.0733	28.5461	28.799	28.9647	28.61	28.9727		196.69	2762400000	74		tr|N0E2N5|N0E2N5_9MICO Uroporphyrinogen decarboxylase OS=Tetrasphaera elongata Lp2 GN=hemE PE=3 SV=1
+	2.19868	-0.484613	N0E5C5	26.0225	26.1095	26.4461	26.0576	26.5106	26.8253	26.5905	26.6479		78.573	560600000	23		tr|N0E5C5|N0E5C5_9MICO Uncharacterized protein OS=Tetrasphaera elongata Lp2 GN=BN10_580009 PE=4 SV=1
+	1.87091	-0.501628	N0DZF8	31.9256	32.4512	31.9953	32.4368	32.739	32.6977	32.6052	32.7733		323.31	39370000000	572		tr|N0DZF8|N0DZF8_9MICO Putative acetyl-CoA acetyltransferase (PhaA) OS=Tetrasphaera elongata Lp2 GN=BN10_1170012 PE=3 SV=1
+	2.13903	-0.501824	N0DZT7	26.5418	26.8703	26.6686	27.0455	27.4221	27.3387	27.2149	27.1579		105.44	980920000	35		tr|N0DZT7|N0DZT7_9MICO Uncharacterized protein OS=Tetrasphaera elongata Lp2 GN=BN10_1270004 PE=4 SV=1
+	2.81902	-0.504681	N0E4R3	26.901	26.8201	26.8355	26.892	27.2728	27.6036	27.1927	27.3981		74.704	980110000	36		tr|N0E4R3|N0E4R3_9MICO Uncharacterized protein OS=Tetrasphaera elongata Lp2 GN=BN10_70004 PE=4 SV=1
+	1.95524	-0.513989	N0DYQ2	26.351	26.4681	26.0073	26.3902	26.8542	27.0645	26.5893	26.7645		58.96	626800000	35		tr|N0DYQ2|N0DYQ2_9MICO Maf-like protein BN10_30007 OS=Tetrasphaera elongata Lp2 GN=BN10_30007 PE=3 SV=1
+	3.53178	-0.520623	N0E5G2	30.9486	31.1654	31.1066	31.1745	31.4994	31.7196	31.6114	31.6472		323.31	17965000000	263		tr|N0E5G2|N0E5G2_9MICO Uncharacterized protein OS=Tetrasphaera elongata Lp2 GN=BN10_590006 PE=4 SV=1
+	2.71303	-0.526757	N0E268	30.8259	30.9894	30.9158	31.0122	31.4823	31.7133	31.3173	31.3374		299.13	15856000000	176		tr|N0E268|N0E268_9MICO Uncharacterized protein OS=Tetrasphaera elongata Lp2 GN=BN10_360002 PE=4 SV=1
+	3.21293	-0.531087	N0DZ32	29.644	29.6154	29.3937	29.5803	30.0704	30.0743	29.9654	30.2477		323.31	6103800000	113		tr|N0DZ32|N0DZ32_9MICO Putative ferredoxin subunit of phenylpropionate dioxygenase OS=Tetrasphaera elongata Lp2 GN=BN10_1080019 PE=4 SV=1
+	1.90761	-0.544876	N0E3Z3	25.8366	26.0322	25.6753	26.1156	26.2818	26.8027	26.3249	26.4299		51.695	533540000	36		tr|N0E3Z3|N0E3Z3_9MICO Putative cystathionine beta-lyase OS=Tetrasphaera elongata Lp2 GN=BN10_590012 PE=4 SV=1
+	2.25902	-0.551974	N0E3H2	26.0623	26.2261	25.6696	26.0176	26.6153	26.659	26.4004	26.5089		111.42	594450000	42		tr|N0E3H2|N0E3H2_9MICO RNA polymerase-binding protein RbpA OS=Tetrasphaera elongata Lp2 GN=rbpA PE=3 SV=1
+	1.84025	-0.560722	N0DXR0	25.9252	26.1504	25.648	25.9936	26.6651	26.7278	26.1805	26.3867		27.981	541960000	21		tr|N0DXR0|N0DXR0_9MICO Phosphoserine phosphatase OS=Tetrasphaera elongata Lp2 GN=serB PE=4 SV=1
+	2.26299	-0.561744	N0DYZ2	28.9262	29.4523	29.1076	29.1066	29.743	29.8811	29.5225	29.693		204.96	4560900000	133		tr|N0DYZ2|N0DYZ2_9MICO Histidinol-phosphate aminotransferase OS=Tetrasphaera elongata Lp2 GN=hisC PE=3 SV=1
+	3.03535	-0.565866	N0E2U0	27.8028	27.7528	27.6693	27.7264	28.2562	28.5604	28.1462	28.2519		107.09	1835500000	59		tr|N0E2U0|N0E2U0_9MICO Mannose-1-phosphate guanylyltransferase OS=Tetrasphaera elongata Lp2 GN=BN10_520002 PE=4 SV=1
+	1.88263	-0.568822	N0E5J8	24.7642	24.8788	24.9285	24.3513	25.2078	25.2648	25.1432	25.5823		23.62	210910000	17		tr|N0E5J8|N0E5J8_9MICO Homocysteine S-methyltransferase OS=Tetrasphaera elongata Lp2 GN=mmuM PE=4 SV=1
+	2.04928	-0.571383	N0E051	32.0302	32.5578	32.0887	32.469	32.9886	32.8487	32.6658	32.9281		323.31	42039000000	387		tr|N0E051|N0E051_9MICO Probable thiol peroxidase OS=Tetrasphaera elongata Lp2 GN=tpx PE=3 SV=1
+	2.10266	-0.571414	N0E4I0	26.8386	27.1019	26.9015	26.8478	27.3243	27.7741	27.6595	27.2175		80.334	1154300000	27		tr|N0E4I0|N0E4I0_9MICO Uncharacterized protein OS=Tetrasphaera elongata Lp2 GN=BN10_650017 PE=4 SV=1
+	2.02432	-0.581398	N0DYU0	31.0643	31.5596	31.0428	31.333	31.8555	32.0882	31.7177	31.6639		323.31	20072000000	268		tr|N0DYU0|N0DYU0_9MICO Aminomethyltransferase OS=Tetrasphaera elongata Lp2 GN=gcvT PE=3 SV=1
+	3.27681	-0.583233	N0DYL8	31.3646	31.4149	31.3395	31.4505	31.7287	32.0252	32.0661	32.0823		323.31	22502000000	404		tr|N0DYL8|N0DYL8_9MICO Cysteine synthase OS=Tetrasphaera elongata Lp2 GN=cysK PE=3 SV=1
+	1.98808	-0.586727	N0E066	27.1137	27.0794	27.1476	27.0709	27.4135	27.9992	27.42	27.9259		117.54	1148400000	52		tr|N0E066|N0E066_9MICO Putative glycosyl transferase OS=Tetrasphaera elongata Lp2 GN=BN10_560031 PE=4 SV=1
+	1.8245	-0.613541	N0E4P0	25.4951	25.7321	25.9897	26.2491	26.6927	26.4728	26.2967	26.458		42.106	490550000	34		tr|N0E4P0|N0E4P0_9MICO Putative secreted penicillin-binding protein OS=Tetrasphaera elongata Lp2 GN=BN10_480013 PE=4 SV=1
+	1.88858	-0.617485	N0DYS8	29.0367	29.4832	29.689	29.6039	29.8998	30.3543	29.9586	30.0701		137.79	5594900000	57		tr|N0DYS8|N0DYS8_9MICO Uncharacterized protein OS=Tetrasphaera elongata Lp2 GN=BN10_1050001 PE=4 SV=1
+	3.32511	-0.623677	N0E5P8	32.0216	32.1185	32.0198	32.188	32.686	32.9094	32.5141	32.7331		323.31	35725000000	337		tr|N0E5P8|N0E5P8_9MICO Uncharacterized protein OS=Tetrasphaera elongata Lp2 GN=BN10_940019 PE=4 SV=1
+	2.76449	-0.64995	N0DZY3	26.0456	25.588	25.9033	25.7243	26.2648	26.5188	26.5111	26.5664		49.857	559790000	24		tr|N0DZY3|N0DZY3_9MICO Uncharacterized protein OS=Tetrasphaera elongata Lp2 GN=BN10_520033 PE=4 SV=1
+	3.07804	-0.650118	N0E6E2	31.5294	31.6486	31.4404	31.502	32.3588	32.3293	32.0533	31.9794		265.57	25287000000	238		tr|N0E6E2|N0E6E2_9MICO 50S ribosomal protein L25 OS=Tetrasphaera elongata Lp2 GN=rplY PE=3 SV=1
+	3.46795	-0.669227	N0DZW3	26.4894	26.6962	26.6873	26.8249	27.4864	27.3175	27.1963	27.3745		84.495	912680000	44		tr|N0DZW3|N0DZW3_9MICO Chromosomal replication initiator protein DnaA OS=Tetrasphaera elongata Lp2 GN=dnaA PE=3 SV=1
+	2.45734	-0.687038	N0E0W6	26.8185	27.0538	27.1853	27.4739	27.7722	27.9823	27.7951	27.73		96.807	1215200000	46		tr|N0E0W6|N0E0W6_9MICO Deoxycytidine triphosphate deaminase OS=Tetrasphaera elongata Lp2 GN=dcd PE=3 SV=1
+	1.93098	-0.69464	N0E216	28.9846	29.3702	28.6462	29.3588	30.0268	29.6803	29.6282	29.803		234.46	4868000000	55		tr|N0E216|N0E216_9MICO Putative two-component system response regulator OS=Tetrasphaera elongata Lp2 GN=BN10_360023 PE=4 SV=1
+	2.30632	-0.69883	N0E5X1	25.6928	25.3987	25.1763	25.3885	26.3881	26.1595	25.7969	26.1072		30.278	382500000	17		tr|N0E5X1|N0E5X1_9MICO Uncharacterized protein OS=Tetrasphaera elongata Lp2 GN=BN10_650031 PE=4 SV=1
+	2.17086	-0.7025	N0E217	27.7473	27.8146	27.7204	27.9621	28.0886	28.8462	28.4355	28.6841		58.489	1887900000	32		tr|N0E217|N0E217_9MICO Glyoxalase family protein OS=Tetrasphaera elongata Lp2 GN=BN10_300071 PE=4 SV=1
+	2.51857	-0.705083	N0E5S3	29.7264	30.1862	29.7613	30.1858	30.6128	30.5466	30.6398	30.8807		323.31	8902900000	144		tr|N0E5S3|N0E5S3_9MICO Ribose-5-phosphate isomerase B OS=Tetrasphaera elongata Lp2 GN=rpiB PE=4 SV=1
+	1.74956	-0.711012	N0DZW7	26.5918	26.8415	26.2941	27.1412	27.6915	27.5884	27.1668	27.2658		42.74	897450000	28		tr|N0DZW7|N0DZW7_9MICO Uncharacterized protein OS=Tetrasphaera elongata Lp2 GN=BN10_520013 PE=4 SV=1
+	1.75743	-0.740583	N0DXD0	26.5467	26.7928	26.7246	25.8478	27.367	27.0356	27.1832	27.2884		69.082	670710000	17		tr|N0DXD0|N0DXD0_9MICO Uncharacterized protein OS=Tetrasphaera elongata Lp2 GN=BN10_1010003 PE=4 SV=1
+	1.77153	-0.747954	N0E3B5	25.5073	26.3339	26.1365	26.4256	27.0052	26.8647	26.5716	26.9536		40.647	582030000	25		tr|N0E3B5|N0E3B5_9MICO Uncharacterized protein OS=Tetrasphaera elongata Lp2 GN=BN10_540030 PE=4 SV=1
+	2.24669	-0.779919	N0E1X1	27.9385	28.245	27.9397	27.9723	28.5012	29.2123	28.5469	28.9547		149.74	2330300000	58		tr|N0E1X1|N0E1X1_9MICO Putative hydrolase (Putative fructose 1,6-bisphosphatase) OS=Tetrasphaera elongata Lp2 GN=BN10_1240008 PE=4 SV=1
+	3.32535	-0.790212	N0E4N9	25.7005	25.9099	25.8017	25.7581	26.7341	26.738	26.285	26.5739		69.523	481230000	25		tr|N0E4N9|N0E4N9_9MICO Uncharacterized protein OS=Tetrasphaera elongata Lp2 GN=BN10_680061 PE=3 SV=1
+	3.20016	-0.81424	N0E3T5	27.3962	27.5286	27.1616	27.5912	28.221	28.1787	28.0746	28.4603		147.32	1560300000	69		tr|N0E3T5|N0E3T5_9MICO Uncharacterized protein OS=Tetrasphaera elongata Lp2 GN=BN10_20008 PE=4 SV=1
+	1.92313	-0.83821	N0E1E2	25.9934	25.4326	25.6381	25.279	26.0043	26.8234	26.581	26.2873		42.225	410150000	26		tr|N0E1E2|N0E1E2_9MICO Uncharacterized protein OS=Tetrasphaera elongata Lp2 GN=BN10_240009 PE=4 SV=1
+	2.06985	-0.849175	N0E1V2	24.8396	25.4805	24.7863	25.3103	25.7328	26.3562	25.8992	25.8252		55.569	302170000	25		tr|N0E1V2|N0E1V2_9MICO ATP-dependent RNA helicase OS=Tetrasphaera elongata Lp2 GN=BN10_680093 PE=4 SV=1
+	2.45239	-0.871754	N0DY10	27.2266	27.8851	27.2345	27.6269	28.2342	28.5982	28.178	28.4496		65.23	1716900000	18		tr|N0DY10|N0DY10_9MICO Uncharacterized protein OS=Tetrasphaera elongata Lp2 GN=BN10_1270005 PE=4 SV=1
+	1.93157	-0.877703	N0E674	32.2794	32.2406	32.0084	32.3065	33.3838	33.5044	33.0012	32.4563		323.31	45055000000	372		tr|N0E674|N0E674_9MICO 30S ribosomal protein S12 OS=Tetrasphaera elongata Lp2 GN=rpsL PE=3 SV=1
+	1.82943	-0.879883	N0E666	30.7946	30.6641	30.198	30.7287	31.5763	32.0445	31.2754	31.0087		152.09	13835000000	149		tr|N0E666|N0E666_9MICO 30S ribosomal protein S14 type Z OS=Tetrasphaera elongata Lp2 GN=rpsNA PE=3 SV=1
+	2.40306	-0.945845	N0E172	32.3042	32.5886	32.0652	31.9774	33.6319	33.0705	33.1123	32.9041		308.86	50975000000	239		tr|N0E172|N0E172_9MICO Uncharacterized protein OS=Tetrasphaera elongata Lp2 GN=BN10_190007 PE=4 SV=1
+	2.0138	-0.979849	N0E410	27.3846	28.1753	27.3757	28.3159	28.7996	28.7412	28.6367	28.9932		236.24	2027700000	57		tr|N0E410|N0E410_9MICO Transcriptional regulator WhiB OS=Tetrasphaera elongata Lp2 GN=whiB PE=3 SV=1
+	1.96454	-0.99086	N0E303	31.0176	31.4733	30.4505	31.0098	31.8665	32.4771	31.9049	31.6662		220.46	19830000000	143		tr|N0E303|N0E303_9MICO 50S ribosomal protein L33 OS=Tetrasphaera elongata Lp2 GN=rpmGA PE=3 SV=1
+	2.76676	-1.07631	N0DZ69	26.9069	26.6513	26.6671	26.8234	27.9883	28.2117	27.3148	27.8391		70.583	1083300000	32		tr|N0DZ69|N0DZ69_9MICO Uncharacterized protein OS=Tetrasphaera elongata Lp2 GN=BN10_1080023 PE=4 SV=1
+	1.90827	-1.1412	N0E0E2	24.3612	23.1825	23.0787	23.5672	24.5162	25.1087	24.5868	24.5426		11.686	226900000	13		tr|N0E0E2|N0E0E2_9MICO Putative helicase helY OS=Tetrasphaera elongata Lp2 GN=helY PE=4 SV=1
	1.45024	3.7906	N0E147	28.6968	28.0821	28.7468	22.9988	22.8731	23.6205	23.0785	23.79		18.936	1565300000	13		tr|N0E147|N0E147_9MICO Uncharacterized protein OS=Tetrasphaera elongata Lp2 GN=BN10_630017 PE=4 SV=1
	0.910559	1.86707	N0E117	27.5017	23.0831	27.0352	26.838	24.4039	24.4775	23.6348	24.4734		10.938	802260000	7		tr|N0E117|N0E117_9MICO Uncharacterized protein OS=Tetrasphaera elongata Lp2 GN=BN10_600005 PE=4 SV=1
	1.56523	1.66148	N0E454	26.3032	25.8097	26.1653	25.8384	25.4669	25.1564	23.6869	23.1604		28.197	403000000	11		tr|N0E454|N0E454_9MICO Putative dehydrogenase (Putative aldehyde dehydrogenase) OS=Tetrasphaera elongata Lp2 GN=BN10_610016 PE=3 SV=1
	1.18015	1.58513	N0E1G0	25.8235	25.9596	23.5448	26.0055	24.1343	23.3183	22.9414	24.5988		8.3289	251600000	8		tr|N0E1G0|N0E1G0_9MICO Putative ATP-dependent helicase lhr OS=Tetrasphaera elongata Lp2 GN=lhr PE=4 SV=1
	0.953673	1.58417	N0E2X0	25.8541	25.6381	26.1677	25.9329	25.7104	25.7661	23.3302	22.4494		30.064	363520000	18		tr|N0E2X0|N0E2X0_9MICO Inner membrane protein yedI OS=Tetrasphaera elongata Lp2 GN=yedI PE=4 SV=1
	0.77882	1.55154	N0DZE9	26.924	27.5835	27.0481	23.9514	24.0356	24.7005	26.4015	24.1632		50.027	713790000	11		tr|N0DZE9|N0DZE9_9MICO Medium-chain-fatty-acid--CoA ligase OS=Tetrasphaera elongata Lp2 GN=alkK PE=4 SV=1
	0.71358	1.44691	N0DZ77	27.2664	27.1612	27.1391	27.0403	23.8985	24.0964	27.4659	27.3587		19.269	1022100000	7		tr|N0DZ77|N0DZ77_9MICO LmbE family protein OS=Tetrasphaera elongata Lp2 GN=BN10_110005 PE=4 SV=1
	0.838929	1.39695	N0DXK2	28.2029	27.6474	28.2206	27.7291	27.4296	24.0963	27.4266	27.2597		31.303	1622300000	22		tr|N0DXK2|N0DXK2_9MICO Isoniazid-inductible protein iniA OS=Tetrasphaera elongata Lp2 GN=iniA PE=4 SV=1
	0.783547	1.3353	N0E5I8	26.4179	25.8155	25.9269	26.4952	25.6057	22.3616	25.4817	25.8654		27.076	453960000	22		tr|N0E5I8|N0E5I8_9MICO CoA-disulfide reductase OS=Tetrasphaera elongata Lp2 GN=cdr PE=4 SV=1
	1.13396	1.31969	N0DY05	25.9365	25.5993	25.9975	25.703	23.2843	23.6245	25.4756	25.5731		24.47	372600000	8		tr|N0DY05|N0DY05_9MICO Putative Pit accessory protein OS=Tetrasphaera elongata Lp2 GN=BN10_1260006 PE=4 SV=1
	1.16291	1.2643	N0E2I5	25.2301	25.176	25.4778	25.2773	23.2609	22.8566	25.1265	24.86		17.377	226460000	10		tr|N0E2I5|N0E2I5_9MICO Uncharacterized protein OS=Tetrasphaera elongata Lp2 GN=BN10_780024 PE=3 SV=1
	0.990988	1.26323	N0DY13	25.8607	25.9349	25.5578	25.5895	26.3043	24.353	23.9377	23.295		23.88	397660000	14		tr|N0DY13|N0DY13_9MICO DNA helicase OS=Tetrasphaera elongata Lp2 GN=pcrA PE=4 SV=1
	0.846351	1.25155	N0E609	26.295	26.1231	26.5853	26.1452	24.6669	26.0402	23.1183	26.3171		29.202	541700000	9		tr|N0E609|N0E609_9MICO Uncharacterized protein OS=Tetrasphaera elongata Lp2 GN=BN10_690023 PE=4 SV=1
	1.02778	1.24528	N0E5Y1	25.739	25.6669	25.7339	25.182	25.4594	23.5765	23.0164	25.2884		33.958	310470000	12		tr|N0E5Y1|N0E5Y1_9MICO Dihydrofolate reductase OS=Tetrasphaera elongata Lp2 GN=dhfrIII PE=3 SV=1
	0.562709	1.18727	N0E6E1	27.5063	27.2367	27.0618	27.2362	26.7833	27.4122	23.1564	26.9399		79.071	958480000	21		tr|N0E6E1|N0E6E1_9MICO Uncharacterized protein OS=Tetrasphaera elongata Lp2 GN=BN10_920014 PE=4 SV=1
	1.21304	1.18019	N0E6H2	25.9179	23.9519	25.9231	25.9206	24.275	24.429	24.4624	23.8264		26.707	359850000	17		tr|N0E6H2|N0E6H2_9MICO DNA topoisomerase (ATP-hydrolyzing) OS=Tetrasphaera elongata Lp2 GN=BN10_990014 PE=4 SV=1
	1.2569	1.17899	N0E5R9	25.3873	23.7427	25.3095	25.0012	23.9068	23.4574	22.9337	24.4267		40.39	282750000	13		tr|N0E5R9|N0E5R9_9MICO Guanylate kinase OS=Tetrasphaera elongata Lp2 GN=gmk PE=3 SV=1
	0.8876	1.17059	N0E190	25.5963	25.5824	26.0582	25.7138	22.6225	25.4076	25.3257	24.9125		45.669	373430000	24		tr|N0E190|N0E190_9MICO Glycolate oxidase subunit glcD OS=Tetrasphaera elongata Lp2 GN=glcD PE=4 SV=1
	1.01733	1.15792	N0E6D8	25.3941	24.9094	25.7999	24.815	24.1332	22.526	24.9047	24.7229		15.803	252990000	7		tr|N0E6D8|N0E6D8_9MICO NreA protein OS=Tetrasphaera elongata Lp2 GN=BN10_910010 PE=4 SV=1
	0.848822	1.13141	N0E5Y3	25.9346	23.7876	25.7861	25.6991	22.9546	25.0092	24.4781	24.2399		30.451	268470000	5		tr|N0E5Y3|N0E5Y3_9MICO Uncharacterized protein OS=Tetrasphaera elongata Lp2 GN=BN10_680010 PE=4 SV=1
	1.05949	1.12547	N0DYD4	25.3588	25.2275	25.3591	25.4319	23.5657	23.0111	25.0902	25.2083		22.692	247790000	11		tr|N0DYD4|N0DYD4_9MICO Transcriptional regulatory protein AfsQ1 OS=Tetrasphaera elongata Lp2 GN=afsQ PE=4 SV=1
	1.73593	1.07886	N0E695	24.8087	24.9077	25.1716	25.5472	24.4717	24.5543	23.7614	23.3324		13.342	256480000	11		tr|N0E695|N0E695_9MICO Putative Histidine kinase OS=Tetrasphaera elongata Lp2 GN=BN10_810027 PE=4 SV=1
	1.27295	1.0748	N0E414	24.7256	26.0357	24.3179	25.3055	24.5783	23.3918	23.9374	24.1781		10.753	180970000	8		tr|N0E414|N0E414_9MICO Acetyl-CoA hydrolase/transferase OS=Tetrasphaera elongata Lp2 GN=BN10_60005 PE=4 SV=1
	1.50068	1.05233	N0DXX3	25.0155	25.7753	25.8292	25.3474	24.4532	23.6404	25.2309	24.4337		17.168	392060000	15		tr|N0DXX3|N0DXX3_9MICO Uncharacterized protein OS=Tetrasphaera elongata Lp2 GN=BN10_120034 PE=4 SV=1
	1.04473	1.05119	N0E5L1	26.1849	25.81	26.3156	26.0365	24.623	25.597	23.8165	26.1057		24.123	437020000	12		tr|N0E5L1|N0E5L1_9MICO Phosphatidylinositol mannoside acyltransferase (Modular protein) OS=Tetrasphaera elongata Lp2 GN=BN10_590071 PE=3 SV=1
	1.05103	1.03202	N0E395	25.1581	24.8849	25.1687	24.6201	24.6804	24.6916	22.6214	23.7103		30.718	151610000	14		tr|N0E395|N0E395_9MICO Putative iron-sulfur heterodisulfide reductase OS=Tetrasphaera elongata Lp2 GN=yvfV PE=4 SV=1
	0.887239	1.02356	N0E699	25.9526	25.4544	25.4796	25.4912	25.3793	25.7214	23.5197	23.6631		54.858	300090000	16		tr|N0E699|N0E699_9MICO Putative ABC transporter OS=Tetrasphaera elongata Lp2 GN=BN10_820010 PE=4 SV=1
	0.854454	1.02073	N0E001	27.3145	26.9128	27.3835	27.188	27.1797	24.4662	26.5685	26.5016		93.963	955500000	24		tr|N0E001|N0E001_9MICO Uncharacterized protein OS=Tetrasphaera elongata Lp2 GN=BN10_530034 PE=4 SV=1
	0.505799	0.989985	N0DZF6	27.0237	26.8362	26.9138	26.7879	23.2508	27.1731	26.7222	26.4555		103.51	826830000	27		tr|N0DZF6|N0DZF6_9MICO Uncharacterized protein OS=Tetrasphaera elongata Lp2 GN=BN10_1130012 PE=4 SV=1
	0.848805	0.989725	N0DZ30	23.543	25.3315	25.5318	26.066	24.7248	23.9279	24.0659	23.7948		11.936	330350000	6		tr|N0DZ30|N0DZ30_9MICO Transcriptional regulator BlaI OS=Tetrasphaera elongata Lp2 GN=blaI PE=4 SV=1
	1.34811	0.975152	N0DZE6	24.6789	25.4082	24.7383	25.1152	23.8679	25.0227	23.6512	23.4981		10.751	143350000	7		tr|N0DZE6|N0DZE6_9MICO Uncharacterized protein OS=Tetrasphaera elongata Lp2 GN=BN10_480027 PE=4 SV=1
	1.69044	0.972572	N0DZS9	25.6708	25.3271	25.9814	25.1627	24.015	24.3441	25.1903	24.7024		32.17	282810000	19		tr|N0DZS9|N0DZS9_9MICO Dihydropteroate synthase OS=Tetrasphaera elongata Lp2 GN=sul PE=3 SV=1
	1.32325	0.944415	N0DXY7	24.6828	23.9176	25.0601	25.2429	24.4471	23.3419	23.8055	23.5312		19.159	153990000	6		tr|N0DXY7|N0DXY7_9MICO NADH-quinone oxidoreductase subunit D OS=Tetrasphaera elongata Lp2 GN=nuoD PE=3 SV=1
	0.457434	0.942133	N0E1T6	27.6411	27.6883	27.7807	27.9251	27.6534	24.0528	27.5879	27.9724		83.568	1606700000	26		tr|N0E1T6|N0E1T6_9MICO Uncharacterized protein OS=Tetrasphaera elongata Lp2 GN=BN10_1210015 PE=4 SV=1
	1.23825	0.935863	N0E097	25.2697	25.2543	25.092	25.0041	25.3323	24.2278	23.6659	23.6508		34.425	176230000	10		tr|N0E097|N0E097_9MICO UvrABC system protein B OS=Tetrasphaera elongata Lp2 GN=uvrB PE=3 SV=1
	1.55839	0.929225	N0E5U9	26.9727	26.3459	27.355	26.1227	26.0583	25.4537	26.0003	25.567		58.528	689670000	33		tr|N0E5U9|N0E5U9_9MICO Bifunctional protein PyrR OS=Tetrasphaera elongata Lp2 GN=pyrR PE=3 SV=1
	1.54258	0.920807	N0E557	24.4329	24.3417	24.2652	25.0228	23.0438	23.8689	24.2164	23.2502		5.988	108860000	7		tr|N0E557|N0E557_9MICO Putative RNA-binding Sun protein OS=Tetrasphaera elongata Lp2 GN=BN10_550003 PE=4 SV=1
	0.794239	0.907574	N0E599	25.536	25.3195	25.4438	25.4378	25.6104	23.7069	25.3831	23.4064		50.919	287420000	12		tr|N0E599|N0E599_9MICO Uncharacterized protein OS=Tetrasphaera elongata Lp2 GN=BN10_820032 PE=4 SV=1
	0.482552	0.892509	N0DYU8	25.1669	24.0237	24.9797	25.2125	24.6928	23.8228	25.4922	21.805		47.991	265550000	11		tr|N0DYU8|N0DYU8_9MICO Putative sodium/proton antiporter OS=Tetrasphaera elongata Lp2 GN=BN10_30006 PE=4 SV=1
	0.478223	0.838591	N0E5R3	26.8875	26.7496	26.9816	26.8535	26.7806	23.6551	26.683	26.9993		82.34	828450000	40		tr|N0E5R3|N0E5R3_9MICO Putative Helicase OS=Tetrasphaera elongata Lp2 GN=BN10_970006 PE=4 SV=1
	1.06384	0.826911	N0E6G5	26.2862	25.876	26.3515	26.1708	26.0825	24.2503	25.4329	25.6114		60.266	462870000	24		tr|N0E6G5|N0E6G5_9MICO Putative sugar kinase OS=Tetrasphaera elongata Lp2 GN=BN10_970009 PE=4 SV=1
	1.65787	0.821987	N0E5J4	28.7823	28.7378	28.5797	28.9407	28.5546	27.305	28.0298	27.8631		86.887	2694500000	61		tr|N0E5J4|N0E5J4_9MICO Alanine dehydrogenase OS=Tetrasphaera elongata Lp2 GN=ald PE=3 SV=1
	0.671295	0.819484	N0E449	26.7674	26.2511	26.7664	26.0427	26.2885	23.967	26.2356	26.0585		41.059	605000000	18		tr|N0E449|N0E449_9MICO Cell envelope-related transcriptional attenuator OS=Tetrasphaera elongata Lp2 GN=BN10_620007 PE=4 SV=1
	0.597891	0.813761	N0E1L9	25.3083	26.1588	23.5901	25.6501	24.7822	23.4188	24.7452	24.5061		43.352	192120000	8		tr|N0E1L9|N0E1L9_9MICO Uncharacterized protein OS=Tetrasphaera elongata Lp2 GN=BN10_300012 PE=4 SV=1
	0.942553	0.803793	N0E3M2	25.4151	24.698	25.2709	25.0867	24.739	23.1004	24.8019	24.6143		14.006	206820000	11		tr|N0E3M2|N0E3M2_9MICO Putative serine/threonine-protein kinase OS=Tetrasphaera elongata Lp2 GN=BN10_560084 PE=4 SV=1
	0.526056	0.802259	N0DYV4	24.53	25.0872	23.8664	24.8221	24.3562	24.2936	24.6202	21.8266		10.202	150800000	5		tr|N0DYV4|N0DYV4_9MICO Putative non-ribosomal peptide synthetase OS=Tetrasphaera elongata Lp2 GN=BN10_1050010 PE=4 SV=1
	0.887725	0.795143	N0E621	23.8088	24.3257	24.7797	24.512	23.8903	23.165	22.6767	24.5136		12.262	501280000	10		tr|N0E621|N0E621_9MICO Uncharacterized protein OS=Tetrasphaera elongata Lp2 GN=BN10_720028 PE=4 SV=1
	1.5874	0.789638	N0E3Q4	26.1686	26.3253	26.3527	26.1353	25.6226	24.6863	25.6422	25.8723		87.843	495570000	23		tr|N0E3Q4|N0E3Q4_9MICO Putative AsnC-family transcriptional regulator OS=Tetrasphaera elongata Lp2 GN=BN10_560043 PE=4 SV=1
	1.13232	0.77213	N0DYJ2	24.4025	23.9927	24.1379	24.7187	22.955	23.9442	23.0403	24.2238		13.717	123210000	4		tr|N0DYJ2|N0DYJ2_9MICO Uncharacterized protein OS=Tetrasphaera elongata Lp2 GN=BN10_1670002 PE=4 SV=1
	1.1112	0.763829	N0E2J3	25.8597	25.4495	26.2422	25.6957	25.4892	24.1082	25.2214	25.3729		47.837	368220000	16		tr|N0E2J3|N0E2J3_9MICO Xanthine dehydrogenase, iron-sulfur subunit OS=Tetrasphaera elongata Lp2 GN=pucE PE=4 SV=1
	0.627949	0.7491	N0DZ80	24.2361	24.4393	24.9099	24.3471	23.7632	23.3795	22.5865	25.2066		17.004	127620000	12		tr|N0DZ80|N0DZ80_9MICO Methylenetetrahydrofolate reductase OS=Tetrasphaera elongata Lp2 GN=metF PE=3 SV=1
	0.416242	0.741488	N0E093	26.0381	25.458	25.8103	25.1711	22.5846	25.7243	25.6529	25.5498		21.114	300970000	27		tr|N0E093|N0E093_9MICO Uncharacterized protein OS=Tetrasphaera elongata Lp2 GN=BN10_540041 PE=4 SV=1
	0.355568	0.740514	N0E4C6	25.8344	26.0984	26.1347	26.0137	26.3104	22.5984	26.1411	26.0693		65.83	494680000	27		tr|N0E4C6|N0E4C6_9MICO Uncharacterized protein OS=Tetrasphaera elongata Lp2 GN=BN10_360041 PE=4 SV=1
	0.83227	0.734648	N0E1L5	25.8166	25.5488	25.5111	25.5541	24.3947	24.7593	24.204	26.134		25.941	341130000	12		tr|N0E1L5|N0E1L5_9MICO Putative isomerase OS=Tetrasphaera elongata Lp2 GN=BN10_1170025 PE=4 SV=1
	0.567155	0.728927	N0E5S5	24.41	24.3056	25.219	24.2427	22.544	24.8061	24.6903	23.2213		7.572	117520000	5		tr|N0E5S5|N0E5S5_9MICO Cyclic pyranopterin monophosphate synthase accessory protein OS=Tetrasphaera elongata Lp2 GN=moaC PE=3 SV=1
	1.08169	0.712965	N0DXZ8	25.4133	24.9866	25.5793	25.2638	24.5747	23.8408	25.4023	24.5733		31.168	237720000	10		tr|N0DXZ8|N0DXZ8_9MICO Uncharacterized protein OS=Tetrasphaera elongata Lp2 GN=BN10_1300008 PE=4 SV=1
	0.957441	0.710739	N0E089	26.0154	25.6487	26.2277	25.6775	25.1953	24.2263	25.3882	25.9166		55.823	384910000	11		tr|N0E089|N0E089_9MICO Proteasome-associated ATPase OS=Tetrasphaera elongata Lp2 GN=arc PE=3 SV=1
	1.28655	0.70577	N0DYQ8	26.1558	25.9759	25.5305	25.6548	25.566	24.4184	25.1076	25.4019		31.389	380020000	14		tr|N0DYQ8|N0DYQ8_9MICO Short-chain dehydrogenase/reductase SDR OS=Tetrasphaera elongata Lp2 GN=BN10_10027 PE=4 SV=1
	0.503015	0.692625	N0DYM0	26.1337	26.2793	25.9906	26.5469	26.3229	25.9862	23.6991	26.1718		8.9429	519790000	16		tr|N0DYM0|N0DYM0_9MICO Putative secreted protein OS=Tetrasphaera elongata Lp2 GN=BN10_190003 PE=4 SV=1
	0.489631	0.680786	N0E6E4	25.5232	25.7257	25.4073	25.3207	22.9445	25.2794	25.3918	25.638		52.081	340320000	15		tr|N0E6E4|N0E6E4_9MICO Putative exopolyphosphatase Ppx/GppA phosphatase OS=Tetrasphaera elongata Lp2 GN=BN10_920029 PE=4 SV=1
	0.832567	0.664026	N0DY26	24.8114	24.2907	24.694	24.714	23.931	22.8945	24.5123	24.516		45.994	158100000	8		tr|N0DY26|N0DY26_9MICO Glutamine amidotransferase / GMP synthase OS=Tetrasphaera elongata Lp2 GN=BN10_130031 PE=4 SV=1
	0.733494	0.662909	N0E5T3	25.0573	25.288	24.6619	24.8775	24.7209	25.0302	24.3742	23.1078		15.886	202990000	8		tr|N0E5T3|N0E5T3_9MICO ABC-type glucosylglycerol transport system permease protein OS=Tetrasphaera elongata Lp2 GN=BN10_990011 PE=3 SV=1
	0.645398	0.662584	N0E354	25.2606	25.3422	25.5034	24.0938	23.7549	23.781	24.7688	25.245		23.075	286160000	8		tr|N0E354|N0E354_9MICO Uncharacterized protein OS=Tetrasphaera elongata Lp2 GN=BN10_890011 PE=4 SV=1
	1.45967	0.657515	N0DY07	27.6421	27.1173	27.8894	27.2635	27.2475	26.4421	26.8341	26.7585		87.99	1217500000	34		tr|N0DY07|N0DY07_9MICO ThiamineS protein OS=Tetrasphaera elongata Lp2 GN=BN10_1260016 PE=4 SV=1
	1.15346	0.655173	N0E246	27.1905	27.1947	27.4968	26.709	26.3724	25.8667	27.0427	26.6885		61.617	939670000	18		tr|N0E246|N0E246_9MICO Ribosomal silencing factor RsfS OS=Tetrasphaera elongata Lp2 GN=yqeL PE=3 SV=1
	0.682051	0.64971	N0DXE4	25.0486	24.0646	24.4567	24.2239	23.4579	23.5162	23.2171	25.0038		34.141	180080000	10		tr|N0DXE4|N0DXE4_9MICO Uncharacterized protein OS=Tetrasphaera elongata Lp2 GN=BN10_1060030 PE=4 SV=1
	0.558246	0.648047	N0E044	25.2719	25.1871	24.9812	25.2622	24.8666	22.9289	25.1619	25.1528		26.157	225970000	9		tr|N0E044|N0E044_9MICO Carbonic anhydrase OS=Tetrasphaera elongata Lp2 GN=cynT PE=3 SV=1
	0.250902	0.643191	N0E5R7	26.6507	24.3332	27.4319	26.7719	23.4139	25.6299	26.6228	26.9484		15.415	924620000	10		tr|N0E5R7|N0E5R7_9MICO ATP-dependent Clp protease ATP-binding subunit ClpX OS=Tetrasphaera elongata Lp2 GN=clpX PE=3 SV=1
	1.46233	0.63665	N0E3V9	25.239	25.1755	24.3815	24.8342	24.0474	24.6313	24.2397	24.1653		34.165	199730000	11		tr|N0E3V9|N0E3V9_9MICO Uncharacterized protein OS=Tetrasphaera elongata Lp2 GN=BN10_570037 PE=4 SV=1
	1.40991	0.63343	N0E264	25.1042	24.7494	24.8257	24.3797	24.1793	24.6428	23.909	23.794		29.184	159540000	9		tr|N0E264|N0E264_9MICO Putative short chain dehydrogenase OS=Tetrasphaera elongata Lp2 GN=BN10_350005 PE=3 SV=1
	0.723514	0.616491	N0E1G8	25.3559	25.9498	26.0632	25.3778	25.6854	25.1871	25.4119	23.9962		20.238	455730000	14		tr|N0E1G8|N0E1G8_9MICO Uncharacterized protein OS=Tetrasphaera elongata Lp2 GN=BN10_280003 PE=4 SV=1
	0.979669	0.609543	N0E4C3	25.0898	25.0464	25.1743	24.9933	23.5185	24.7529	24.8518	24.7423		14.964	214180000	9		tr|N0E4C3|N0E4C3_9MICO Uncharacterized protein OS=Tetrasphaera elongata Lp2 GN=BN10_360036 PE=4 SV=1
	0.962739	0.608914	N0E4V1	25.6274	25.6847	25.3755	25.3816	25.7197	24.1944	24.9125	24.8069		23.166	324430000	14		tr|N0E4V1|N0E4V1_9MICO Uncharacterized protein OS=Tetrasphaera elongata Lp2 GN=BN10_720039 PE=4 SV=1
	0.502924	0.605711	N0DXR9	25.9575	26.4331	25.5363	26.5491	24.0356	25.859	25.9129	26.2457		12.26	475730000	20		tr|N0DXR9|N0DXR9_9MICO Putative ion-transporting ATPase OS=Tetrasphaera elongata Lp2 GN=BN10_1270001 PE=4 SV=1
	1.55228	0.604252	N0E098	32.2194	31.6566	32.45	32.0894	31.6105	31.1214	31.5906	31.6759		323.31	29183000000	327		tr|N0E098|N0E098_9MICO Siderophore-interacting protein OS=Tetrasphaera elongata Lp2 GN=BN10_540051 PE=4 SV=1
	0.813506	0.590501	N0E4V6	24.7569	24.4339	24.6322	24.6007	24.6283	23.0006	24.3392	24.0935		23.915	159020000	18		tr|N0E4V6|N0E4V6_9MICO Putative regulator OS=Tetrasphaera elongata Lp2 GN=BN10_520015 PE=4 SV=1
	0.685274	0.581826	N0DXG6	25.189	25.1461	25.8937	24.956	25.2555	24.6379	25.2274	23.7366		30.964	298530000	16		tr|N0DXG6|N0DXG6_9MICO Uncharacterized protein OS=Tetrasphaera elongata Lp2 GN=BN10_1100007 PE=4 SV=1
	1.31755	0.576819	N0DZG7	26.0598	25.7102	25.9752	26.4098	25.8822	25.2932	25.6234	25.0489		44.197	465390000	33		tr|N0DZG7|N0DZG7_9MICO Putative acyl-CoA dehydrogenase OS=Tetrasphaera elongata Lp2 GN=BN10_50005 PE=3 SV=1
	1.47593	0.576278	N0DYL9	25.3776	24.8812	25.4516	24.8616	24.944	24.4237	24.5909	24.3083		40.129	213110000	12		tr|N0DYL9|N0DYL9_9MICO Glutamyl-tRNA reductase OS=Tetrasphaera elongata Lp2 GN=hemA PE=3 SV=1
	0.982498	0.574718	N0E2D7	24.9895	25.1981	25.2721	25.47	24.1655	24.2363	25.3659	24.8631		26.266	245750000	12		tr|N0E2D7|N0E2D7_9MICO Uncharacterized protein OS=Tetrasphaera elongata Lp2 GN=BN10_460047 PE=4 SV=1
	1.0789	0.570905	N0DYV9	26.3284	25.6982	25.7399	25.5786	25.7779	24.7149	25.2316	25.3372		36.659	387460000	14		tr|N0DYV9|N0DYV9_9MICO Cell division protein SepF OS=Tetrasphaera elongata Lp2 GN=sepF PE=3 SV=1
	0.562044	0.569009	N0DZI8	24.6316	24.8709	24.1658	24.533	23.1872	24.9309	24.5672	23.24		21.001	150270000	6		tr|N0DZI8|N0DZI8_9MICO Putative glycosyl transferase OS=Tetrasphaera elongata Lp2 GN=BN10_500004 PE=4 SV=1
	0.521147	0.564041	N0DZ95	24.989	25.3553	25.0151	24.9522	23.7409	25.9428	24.2977	24.0739		12.63	188180000	12		tr|N0DZ95|N0DZ95_9MICO Fused cysteine transporter subunits of ABC superfamily: membrane component ATP-binding component OS=Tetrasphaera elongata Lp2 GN=BN10_400001 PE=3 SV=1
	1.50295	0.555279	N0DYS5	33.6297	33.0226	33.6743	33.1566	33.0911	32.5535	32.77	32.8475		323.31	72457000000	1130		tr|N0DYS5|N0DYS5_9MICO Ribonucleoside-diphosphate reductase OS=Tetrasphaera elongata Lp2 GN=rnr PE=3 SV=1
	0.730684	0.554968	N0DYW1	25.4136	25.4096	25.5014	25.5195	25.3426	23.8004	25.3116	25.1696		30.31	298510000	8		tr|N0DYW1|N0DYW1_9MICO Pseudouridine synthase OS=Tetrasphaera elongata Lp2 GN=BN10_300064 PE=3 SV=1
	0.465008	0.554638	N0E2B6	25.4136	25.3794	25.4687	25.5325	25.9463	25.4815	24.6521	23.4956		55.653	356590000	15		tr|N0E2B6|N0E2B6_9MICO Holo-[acyl-carrier-protein] synthase OS=Tetrasphaera elongata Lp2 GN=acpS PE=3 SV=1
	1.21319	0.54948	N0DZR3	27.5188	27.3497	27.5662	27.4218	27.2776	26.2456	26.9428	27.1926		86.61	1221600000	48		tr|N0DZR3|N0DZR3_9MICO Potassium uptake protein OS=Tetrasphaera elongata Lp2 GN=BN10_1210006 PE=4 SV=1
	1.17311	0.532471	N0E5C7	26.9532	26.7703	26.4125	26.5494	25.6009	26.556	26.0552	26.3433		54.735	665840000	27		tr|N0E5C7|N0E5C7_9MICO Uncharacterized protein OS=Tetrasphaera elongata Lp2 GN=BN10_850009 PE=4 SV=1
	0.505755	0.53154	N0E5P7	25.1441	24.8932	25.2773	25.5722	24.971	25.1803	23.3229	25.2865		19.306	305370000	13		tr|N0E5P7|N0E5P7_9MICO Putative ATP-binding protein OS=Tetrasphaera elongata Lp2 GN=BN10_920055 PE=4 SV=1
	1.10548	0.525679	N0E6C3	26.1891	26.1579	26.6815	26.3629	25.9825	25.1772	26.1228	26.0063		68.196	573080000	33		tr|N0E6C3|N0E6C3_9MICO 2-C-methyl-D-erythritol 4-phosphate cytidylyltransferase OS=Tetrasphaera elongata Lp2 GN=ispD PE=3 SV=1
	0.299004	0.523893	N0DZL7	25.2451	25.4757	25.2637	25.4478	25.5367	22.6392	25.6003	25.5605		27.494	319720000	9		tr|N0DZL7|N0DZL7_9MICO Putative RNA nucleotidyltransferase OS=Tetrasphaera elongata Lp2 GN=BN10_480006 PE=4 SV=1
	0.859975	0.519039	N0E1C5	25.2124	25.0714	25.5591	25.2499	25.2798	24.2268	24.2946	25.2154		14.284	201990000	13		tr|N0E1C5|N0E1C5_9MICO Uncharacterized protein OS=Tetrasphaera elongata Lp2 GN=BN10_200002 PE=4 SV=1
	1.72065	0.518876	N0DXT9	29.7345	29.3451	30.0558	29.7493	29.304	29.1962	29.3123	28.9968		268.14	5436200000	123		tr|N0DXT9|N0DXT9_9MICO ATP synthase subunit b OS=Tetrasphaera elongata Lp2 GN=atpF PE=3 SV=1
	0.376991	0.508228	N0DZ14	25.8868	25.1919	25.2987	24.2218	24.0126	24.9773	25.8258	23.7506		20.724	285570000	9		tr|N0DZ14|N0DZ14_9MICO UDP-N-acetylglucosamine--N-acetylmuramyl-(pentapeptide) pyrophosphoryl-undecaprenol N-acetylglucosamine transferase OS=Tetrasphaera elongata Lp2 GN=murG PE=3 SV=1
	0.252175	0.504252	N0DXE5	26.753	26.6655	24.0152	26.805	25.9819	26.0509	25.9786	24.2102		6.6382	569210000	5		tr|N0DXE5|N0DXE5_9MICO DNA helicase OS=Tetrasphaera elongata Lp2 GN=BN10_1070003 PE=4 SV=1
	0.691615	0.503569	N0E203	24.403	25.2532	23.8757	24.5268	24.4151	23.4563	24.2367	23.9364		22.409	107590000	7		tr|N0E203|N0E203_9MICO Uncharacterized protein OS=Tetrasphaera elongata Lp2 GN=BN10_360008 PE=4 SV=1
	0.601985	0.50087	N0E419	24.587	24.2651	24.9098	24.2819	24.7972	23.472	24.4509	23.3203		8.7638	145670000	9		tr|N0E419|N0E419_9MICO Putative MoxR-like ATPase OS=Tetrasphaera elongata Lp2 GN=BN10_30019 PE=4 SV=1
	1.50626	0.484802	N0E1S7	25.75	26.1019	26.0567	25.9408	25.8727	25.1215	25.425	25.491		53.743	444830000	20		tr|N0E1S7|N0E1S7_9MICO Acetoin utilization protein AcuC OS=Tetrasphaera elongata Lp2 GN=acuC PE=4 SV=1
	1.71497	0.483455	N0E2L7	27.5573	27.396	27.4338	27.1972	26.9778	26.5213	27.1007	27.0507		116.56	1077800000	31		tr|N0E2L7|N0E2L7_9MICO Putative Peroxiredoxin OS=Tetrasphaera elongata Lp2 GN=bcp PE=4 SV=1
	1.33916	0.480533	N0E6G9	31.404	31.2677	31.5752	31.3925	31.3435	30.462	30.9552	30.9566		323.31	17968000000	260		tr|N0E6G9|N0E6G9_9MICO Elongation factor P OS=Tetrasphaera elongata Lp2 GN=efp PE=3 SV=1
	0.328546	0.480055	N0E2I4	24.6554	24.4154	24.282	25.0463	24.6922	24.8206	22.3275	24.6386		9.0103	169940000	10		tr|N0E2I4|N0E2I4_9MICO Uncharacterized protein OS=Tetrasphaera elongata Lp2 GN=BN10_1320008 PE=4 SV=1
	1.08862	0.476023	N0E4E1	25.9791	25.807	26.409	25.651	25.7596	25.028	25.5801	25.5742		33.505	429380000	25		tr|N0E4E1|N0E4E1_9MICO Putative dihydroxyacetone kinase OS=Tetrasphaera elongata Lp2 GN=BN10_40015 PE=4 SV=1
	0.51859	0.462293	N0E1V4	25.3195	24.6096	25.908	25.1612	25.001	24.9214	25.3348	23.892		23.53	294420000	19		tr|N0E1V4|N0E1V4_9MICO L-fuculose phosphate aldolase OS=Tetrasphaera elongata Lp2 GN=BN10_300072 PE=4 SV=1
	0.278848	0.46036	N0E3S8	25.0394	25.4181	25.3253	25.4058	22.8011	25.5205	25.4856	25.5399		30.302	325720000	17		tr|N0E3S8|N0E3S8_9MICO Putative FMN-dependent monooxygenase OS=Tetrasphaera elongata Lp2 GN=BN10_560078 PE=4 SV=1
	0.8484	0.457511	N0E4Q6	25.2685	24.8736	25.388	25.0205	24.7888	25.31	24.441	24.1807		18.888	215520000	17		tr|N0E4Q6|N0E4Q6_9MICO Molybdenum ABC transporter, periplasmic molybdate-binding protein OS=Tetrasphaera elongata Lp2 GN=BN10_690030 PE=4 SV=1
	1.69136	0.448527	N0DY49	27.5797	27.2622	27.5584	27.3785	27.1287	27.1691	27.0479	26.6389		116.54	1197000000	51		tr|N0DY49|N0DY49_9MICO D-amino-acid dehydrogenase OS=Tetrasphaera elongata Lp2 GN=BN10_130096 PE=4 SV=1
	0.946465	0.447204	N0E297	27.0626	26.6951	27.3004	26.4966	26.6328	26.3735	26.739	26.0205		61.24	789630000	35		tr|N0E297|N0E297_9MICO Phospho-2-dehydro-3-deoxyheptonate aldolase OS=Tetrasphaera elongata Lp2 GN=aroH PE=4 SV=1
	0.992556	0.444803	N0E1K1	27.5999	27.1016	27.5307	27.4572	27.2859	26.3831	27.1285	27.1127		82.963	1146900000	46		tr|N0E1K1|N0E1K1_9MICO Amidophosphoribosyltransferase OS=Tetrasphaera elongata Lp2 GN=purF PE=3 SV=1
	1.43893	0.438929	N0E0U9	26.9919	27.0585	27.3959	27.0738	26.5651	26.3766	26.9867	26.8359		39.204	911370000	38		tr|N0E0U9|N0E0U9_9MICO Translation initiation factor IF-3 OS=Tetrasphaera elongata Lp2 GN=infC PE=3 SV=1
	0.863684	0.436298	N0E2S8	27.1932	26.3902	27.0856	26.4201	26.6087	25.9977	26.5085	26.2291		65.877	776360000	18		tr|N0E2S8|N0E2S8_9MICO Chorismate synthase OS=Tetrasphaera elongata Lp2 GN=aroC PE=3 SV=1
	0.294199	0.43225	N0DZT9	25.5958	23.5996	25.8215	25.9767	25.189	25.2655	24.1322	24.6779		27.098	283770000	10		tr|N0DZT9|N0DZT9_9MICO Putative type II/type IV pathway secretion protein OS=Tetrasphaera elongata Lp2 GN=BN10_1230013 PE=4 SV=1
	0.423679	0.424375	N0E1B5	24.7235	25.0429	25.1475	25.1672	24.4818	24.6569	25.6785	23.5663		31.822	242410000	11		tr|N0E1B5|N0E1B5_9MICO Uncharacterized protein OS=Tetrasphaera elongata Lp2 GN=BN10_230024 PE=4 SV=1
	0.821645	0.423713	N0E1B9	29.4791	29.1714	29.4216	29.4802	29.4596	28.2811	29.0482	29.0686		98.2	4482500000	74		tr|N0E1B9|N0E1B9_9MICO Uncharacterized protein OS=Tetrasphaera elongata Lp2 GN=BN10_20014 PE=4 SV=1
	1.49215	0.420552	N0DY44	30.5458	30.157	30.6125	30.3042	30.0656	29.6632	30.14	30.0684		323.31	8657500000	190		tr|N0DY44|N0DY44_9MICO Adenylosuccinate lyase OS=Tetrasphaera elongata Lp2 GN=purB PE=4 SV=1
	1.70386	0.410023	N0E0L1	28.6172	28.1692	28.5602	28.3305	27.9187	27.8785	28.2292	28.0105		147.79	2366300000	78		tr|N0E0L1|N0E0L1_9MICO Uncharacterized protein OS=Tetrasphaera elongata Lp2 GN=BN10_1410003 PE=4 SV=1
	0.696101	0.405436	N0E4V7	27.5524	26.5137	27.3551	26.655	26.4868	26.8741	26.7468	26.3468		81.14	949740000	35		tr|N0E4V7|N0E4V7_9MICO Methionine aminopeptidase OS=Tetrasphaera elongata Lp2 GN=BN10_730007 PE=4 SV=1
	1.43953	0.403213	N0E1L0	28.9498	29.2212	29.0717	29.0518	28.8276	28.3941	28.4798	28.9801		136.82	3905100000	111		tr|N0E1L0|N0E1L0_9MICO Uncharacterized protein OS=Tetrasphaera elongata Lp2 GN=BN10_650044 PE=4 SV=1
	1.54032	0.39923	N0DY54	27.7532	27.4189	27.346	27.7864	27.3695	26.9778	27.2244	27.1359		115.78	1234900000	36		tr|N0DY54|N0DY54_9MICO Putative hydrolase OS=Tetrasphaera elongata Lp2 GN=BN10_1300007 PE=4 SV=1
	0.52105	0.397758	N0E1T9	24.4517	25.2028	25.0348	24.688	24.0463	23.8145	25.1183	24.8072		14.806	180500000	6		tr|N0E1T9|N0E1T9_9MICO Uncharacterized protein OS=Tetrasphaera elongata Lp2 GN=BN10_680078 PE=4 SV=1
	1.37856	0.396836	N0DYQ5	28.6048	28.4241	28.5995	28.3196	28.3517	27.7671	27.9615	28.2805		277.52	2483500000	85		tr|N0DYQ5|N0DYQ5_9MICO Stearoyl-CoA 9-desaturase electron transfer partner OS=Tetrasphaera elongata Lp2 GN=BN10_10022 PE=4 SV=1
	1.45548	0.393705	N0E1D3	28.2585	27.8488	28.149	27.7283	27.8236	27.4988	27.5242	27.5633		194.81	1748200000	54		tr|N0E1D3|N0E1D3_9MICO Uncharacterized protein OS=Tetrasphaera elongata Lp2 GN=BN10_640002 PE=4 SV=1
	0.201733	0.3844	N0E5R6	24.5419	26.1072	24.4168	25.1628	24.6744	23.3066	26.4129	24.2972		12.018	312240000	11		tr|N0E5R6|N0E5R6_9MICO Uncharacterized protein OS=Tetrasphaera elongata Lp2 GN=BN10_970011 PE=4 SV=1
	0.256117	0.383063	N0E5S4	25.7631	26.2749	24.2845	25.8818	25.0912	24.0273	25.4895	26.0642		13.168	367970000	11		tr|N0E5S4|N0E5S4_9MICO Uncharacterized protein OS=Tetrasphaera elongata Lp2 GN=BN10_980016 PE=4 SV=1
	1.53464	0.380884	N0E5H1	29.2036	29.1873	29.4577	29.2402	28.8838	29.2272	28.7154	28.7389		156.92	4082800000	99		tr|N0E5H1|N0E5H1_9MICO Transcriptional regulator, CarD-like regulator OS=Tetrasphaera elongata Lp2 GN=BN10_890004 PE=4 SV=1
	1.23532	0.37812	N0E348	28.5416	27.9725	28.1941	28.1072	28.0543	27.5412	27.8179	27.8895		100.37	1994400000	64		tr|N0E348|N0E348_9MICO 2-C-methyl-D-erythritol 2,4-cyclodiphosphate synthase OS=Tetrasphaera elongata Lp2 GN=ispF PE=3 SV=1
	0.216135	0.376724	N0E146	26.1224	25.9552	26.3863	26.4548	26.5622	26.7028	23.8056	26.3411		20.602	519450000	15		tr|N0E146|N0E146_9MICO Oligopeptide ABC transporter (ATP-binding protein) OS=Tetrasphaera elongata Lp2 GN=oppD PE=3 SV=1
	1.37496	0.373586	N0E143	31.9928	31.5363	31.9793	31.6429	31.5504	31.1739	31.5307	31.402		323.31	23628000000	552		tr|N0E143|N0E143_9MICO FeS cluster formation protein OS=Tetrasphaera elongata Lp2 GN=sufB PE=4 SV=1
	1.58535	0.372231	N0E5R2	33.9367	33.4932	34.0182	33.6253	33.383	33.3522	33.4549	33.3943		323.31	97118000000	1483		tr|N0E5R2|N0E5R2_9MICO Vitamin B12-dependent ribonucleotide reductase OS=Tetrasphaera elongata Lp2 GN=nrdJ PE=4 SV=1
	1.62394	0.369561	N0E491	27.3325	27.3332	27.1883	26.9829	26.9887	26.7388	26.9965	26.6348		66.215	968250000	23		tr|N0E491|N0E491_9MICO Putative phosphoglycerate mutase OS=Tetrasphaera elongata Lp2 GN=BN10_310002 PE=4 SV=1
	0.97472	0.369117	N0E4N4	27.0267	26.4755	26.8846	26.4721	26.519	25.9517	26.4724	26.4393		29.874	698100000	18		tr|N0E4N4|N0E4N4_9MICO N(G),N(G)-dimethylarginine dimethylaminohydrolase OS=Tetrasphaera elongata Lp2 GN=ddaH PE=4 SV=1
	1.0224	0.365706	N0E5Z6	27.6675	27.9861	27.9192	28.0081	27.7554	27.049	27.5536	27.7601		117.07	1645200000	79		tr|N0E5Z6|N0E5Z6_9MICO Formate--tetrahydrofolate ligase OS=Tetrasphaera elongata Lp2 GN=fhs PE=3 SV=1
	1.39744	0.365032	N0DYR4	26.7868	26.6118	26.7453	26.4415	26.2142	25.9875	26.4078	26.5157		130.95	680200000	44		tr|N0DYR4|N0DYR4_9MICO Porphobilinogen deaminase OS=Tetrasphaera elongata Lp2 GN=hemC PE=3 SV=1
	1.72264	0.363904	N0E2G5	29.6524	29.2217	29.6494	29.3825	29.1557	29.1368	29.1719	28.986		279.13	4686800000	124		tr|N0E2G5|N0E2G5_9MICO Putative ferredoxin oxidoreductase (Putative pyruvate synthase (PorA)) and gamma subunit OS=Tetrasphaera elongata Lp2 GN=BN10_460016 PE=4 SV=1
	0.215756	0.363643	N0DYE6	24.2982	25.3279	24.4093	23.8439	22.8389	25.0086	23.3431	25.2343		21.16	201730000	6		tr|N0DYE6|N0DYE6_9MICO Amino acid aminotransferase OS=Tetrasphaera elongata Lp2 GN=BN10_1700004 PE=4 SV=1
	0.546718	0.361822	N0DYD6	24.895	24.278	25.4735	24.4832	24.1702	24.2369	24.8724	24.403		16.388	178440000	16		tr|N0DYD6|N0DYD6_9MICO Putative Transcriptional regulator, TetR family OS=Tetrasphaera elongata Lp2 GN=BN10_1400005 PE=4 SV=1
	0.712158	0.361482	N0DYC9	24.5899	23.8847	24.8535	24.3712	24.3617	23.7741	24.2248	23.8927		46.46	162330000	14		tr|N0DYC9|N0DYC9_9MICO Two component transcriptional regulator, LuxR family OS=Tetrasphaera elongata Lp2 GN=BN10_1620006 PE=4 SV=1
	1.00367	0.361134	N0DYU7	24.1495	24.2961	23.968	24.0406	23.6348	23.9586	23.327	24.0892		8.8216	112500000	9		tr|N0DYU7|N0DYU7_9MICO Putative two-component regulatory system (Putative response regulator) OS=Tetrasphaera elongata Lp2 GN=BN10_1040003 PE=4 SV=1
	0.290588	0.359523	N0DZH9	25.0697	24.6485	24.9477	24.9551	25.8742	24.458	23.3973	24.4534		10.019	143500000	7		tr|N0DZH9|N0DZH9_9MICO UPF0061 protein BN10_120007 OS=Tetrasphaera elongata Lp2 GN=BN10_120007 PE=3 SV=1
	1.43335	0.358871	N0DXP1	30.2134	30.0781	30.4842	30.1374	30.1061	29.8061	29.9321	29.6333		280.53	8010700000	195		tr|N0DXP1|N0DXP1_9MICO Putative 30S ribosomal protein S16 OS=Tetrasphaera elongata Lp2 GN=BN10_1220003 PE=4 SV=1
	1.34037	0.358599	N0E533	28.571	28.2315	28.6759	28.341	28.1878	28.0937	28.2826	27.8209		78.426	2390400000	49		tr|N0E533|N0E533_9MICO Protein ArsC OS=Tetrasphaera elongata Lp2 GN=arsC PE=4 SV=1
	0.637262	0.356722	N0E5K7	27.3404	26.9498	28.0126	27.2115	27.1435	27.012	27.2988	26.6331		107.68	1212700000	38		tr|N0E5K7|N0E5K7_9MICO 2-isopropylmalate synthase OS=Tetrasphaera elongata Lp2 GN=BN10_900046 PE=4 SV=1
	1.49482	0.354712	N0E3V1	26.0815	25.7101	26.1992	25.8489	25.4823	25.5403	25.6228	25.7754		50.06	440790000	28		tr|N0E3V1|N0E3V1_9MICO DNA ligase OS=Tetrasphaera elongata Lp2 GN=ligA PE=3 SV=1
	1.41542	0.346453	N0E3U7	29.8992	29.5371	29.9341	29.6139	29.6408	29.2832	29.3958	29.2787		321.89	5820100000	178		tr|N0E3U7|N0E3U7_9MICO Acetyl-coenzyme A synthetase OS=Tetrasphaera elongata Lp2 GN=acs PE=3 SV=1
	1.21229	0.344913	N0E1X5	29.0456	28.7339	29.0705	28.6567	28.6934	28.6236	28.5907	28.2193		245.72	3324200000	132		tr|N0E1X5|N0E1X5_9MICO Putative transmembrane transport protein (Modular protein) OS=Tetrasphaera elongata Lp2 GN=BN10_690026 PE=4 SV=1
	1.52116	0.342231	N0E5M1	29.5367	29.1174	29.5752	29.2707	29.033	29.0818	29.1283	28.8879		207.86	4582600000	119		tr|N0E5M1|N0E5M1_9MICO Ribose-phosphate pyrophosphokinase OS=Tetrasphaera elongata Lp2 GN=prs PE=3 SV=1
	0.327734	0.337784	N0DXS0	24.028	25.2196	25.7745	25.0842	24.1653	24.5096	24.7613	25.3189		33.299	234480000	11		tr|N0DXS0|N0DXS0_9MICO Isochorismatase OS=Tetrasphaera elongata Lp2 GN=BN10_1100006 PE=4 SV=1
	1.47739	0.336586	N0E566	27.7909	27.8075	27.998	27.9068	27.6405	27.748	27.5427	27.2258		176.7	1557100000	70		tr|N0E566|N0E566_9MICO Protein AidB OS=Tetrasphaera elongata Lp2 GN=aidB PE=3 SV=1
	0.293923	0.335344	N0E5N5	25.4291	25.7527	25.5665	24.7225	26.1818	25.0293	24.1922	24.7262		23.584	336710000	13		tr|N0E5N5|N0E5N5_9MICO Uncharacterized protein OS=Tetrasphaera elongata Lp2 GN=BN10_930025 PE=4 SV=1
	0.427073	0.329699	N0DYT4	24.8418	24.6541	24.7499	24.5138	24.9621	24.0732	23.5464	24.8591		13.867	200920000	10		tr|N0DYT4|N0DYT4_9MICO ATP-dependent helicase OS=Tetrasphaera elongata Lp2 GN=hrpA PE=4 SV=1
	1.595	0.328091	N0E5Q9	26.4608	26.1908	26.2752	26.2054	26.1112	26.0865	25.9071	25.7149		58.682	562000000	30		tr|N0E5Q9|N0E5Q9_9MICO LexA repressor OS=Tetrasphaera elongata Lp2 GN=lexA PE=3 SV=1
	0.278502	0.323845	N0E209	25.3112	24.5331	25.0277	23.4959	24.5622	24.6237	24.4184	23.4682		59.293	225140000	13		tr|N0E209|N0E209_9MICO Polyphosphate kinase OS=Tetrasphaera elongata Lp2 GN=ppk PE=3 SV=1
	1.1817	0.320432	N0E3T1	26.8062	26.6297	26.6476	26.5188	26.3411	26.0382	26.2739	26.6674		55.992	699920000	32		tr|N0E3T1|N0E3T1_9MICO Argininosuccinate synthase OS=Tetrasphaera elongata Lp2 GN=argG PE=3 SV=1
	1.66668	0.319547	N0E153	30.49	30.7414	30.4862	30.7047	30.4878	30.2984	30.1114	30.2466		286.09	10528000000	245		tr|N0E153|N0E153_9MICO Succinate dehydrogenase iron-sulfur subunit OS=Tetrasphaera elongata Lp2 GN=sdhB PE=4 SV=1
	1.57834	0.319478	N0DYU5	28.4821	28.022	28.1165	28.14	27.8282	27.8464	27.996	27.8121		54.008	1892200000	48		tr|N0DYU5|N0DYU5_9MICO Transcriptional regulator MraZ OS=Tetrasphaera elongata Lp2 GN=mraZ PE=3 SV=1
	1.27198	0.315881	N0DXQ2	32.4565	32.0711	32.5001	32.1302	32.0172	31.7591	32.0738	32.0443		323.31	34525000000	542		tr|N0DXQ2|N0DXQ2_9MICO Sulfur mobilizing ABC protein, ATPase OS=Tetrasphaera elongata Lp2 GN=sufC PE=4 SV=1
	0.762608	0.314674	N0DZQ4	24.7076	25.1881	25.2742	25.1694	24.4267	24.579	25.076	24.9988		24.507	206940000	11		tr|N0DZQ4|N0DZQ4_9MICO Uncharacterized transcriptional regulatory protein yfiK OS=Tetrasphaera elongata Lp2 GN=yfiK PE=4 SV=1
	0.713452	0.312435	N0E352	28.1607	27.4798	27.753	27.3924	27.5149	27.0244	27.4101	27.5868		159.03	1524300000	48		tr|N0E352|N0E352_9MICO Two-component response regulator (YycG) OS=Tetrasphaera elongata Lp2 GN=walR PE=4 SV=1
	1.01809	0.311289	N0DYR2	27.1957	27.0631	27.2254	26.9337	26.9424	27.0758	26.7347	26.42		99.465	1009200000	42		tr|N0DYR2|N0DYR2_9MICO Putative ABC transporter ATP-binding protein in cobA 5region OS=Tetrasphaera elongata Lp2 GN=BN10_100006 PE=3 SV=1
	1.66576	0.310753	N0DY24	25.7767	25.7284	25.7485	25.4983	25.5592	25.3941	25.3768	25.1788		47.443	353800000	9		tr|N0DY24|N0DY24_9MICO Acetolactate synthase (Acetohydroxy-acid synthase) (Small subunit) OS=Tetrasphaera elongata Lp2 GN=ilvH PE=4 SV=1
	1.33046	0.310448	N0E2Q7	25.179	25.105	25.125	24.9035	24.6958	24.5068	24.8523	25.0158		22.025	220940000	19		tr|N0E2Q7|N0E2Q7_9MICO UPF0225 protein BN10_500007 OS=Tetrasphaera elongata Lp2 GN=BN10_500007 PE=3 SV=1
	0.447076	0.309035	N0E340	26.1961	25.6649	26.7393	26.4107	25.9374	26.0528	25.38	26.4047		26.511	555630000	13		tr|N0E340|N0E340_9MICO Uncharacterized protein OS=Tetrasphaera elongata Lp2 GN=BN10_1470002 PE=4 SV=1
	1.06061	0.308058	N0E125	29.0531	28.6148	29.2652	28.974	28.8656	28.593	28.6264	28.5898		169.76	3464200000	124		tr|N0E125|N0E125_9MICO Uncharacterized protein OS=Tetrasphaera elongata Lp2 GN=BN10_600010 PE=4 SV=1
	1.39711	0.30518	N0DXL9	28.5389	28.4699	28.75	28.4702	28.4802	28.2789	28.0106	28.2385		161.79	2681200000	109		tr|N0DXL9|N0DXL9_9MICO GloA OS=Tetrasphaera elongata Lp2 GN=BN10_1060019 PE=4 SV=1
	1.51722	0.302554	N0DY48	28.7533	28.3391	28.7687	28.6622	28.3289	28.2277	28.4171	28.3396		182.75	2725500000	94		tr|N0DY48|N0DY48_9MICO Fumarate hydratase class II OS=Tetrasphaera elongata Lp2 GN=fumC PE=3 SV=1
	1.08351	0.294858	N0DYE3	27.535	27.4924	27.6063	27.2547	27.4421	26.8768	27.2655	27.1244		75.163	1306700000	48		tr|N0DYE3|N0DYE3_9MICO Putative esterase/lipase YbfF OS=Tetrasphaera elongata Lp2 GN=BN10_1460005 PE=4 SV=1
	1.00878	0.294841	N0E3J7	27.1599	26.791	27.1154	26.8804	27.0056	26.5277	26.4766	26.7575		76.996	898280000	35		tr|N0E3J7|N0E3J7_9MICO Glutamate racemase OS=Tetrasphaera elongata Lp2 GN=murI PE=3 SV=1
	1.32194	0.294456	N0E0R0	27.8351	27.5754	28.0247	27.6088	27.4515	27.6232	27.369	27.4225		191.6	1609700000	73		tr|N0E0R0|N0E0R0_9MICO Putative Y4bN OS=Tetrasphaera elongata Lp2 GN=BN10_140067 PE=4 SV=1
	1.07283	0.292893	N0E401	30.7097	30.2506	30.6817	30.3644	30.0816	30.0929	30.2185	30.4418		314.75	10211000000	168		tr|N0E401|N0E401_9MICO Pyridoxal 5-phosphate synthase subunit PdxS OS=Tetrasphaera elongata Lp2 GN=pdxS PE=3 SV=1
	0.931382	0.289491	N0E308	27.9903	28.5631	28.3862	28.2684	27.7876	28.1187	27.9015	28.2424		146.07	2141200000	74		tr|N0E308|N0E308_9MICO Putative endonuclease 4 OS=Tetrasphaera elongata Lp2 GN=nfo PE=4 SV=1
	0.67513	0.286214	N0E4N6	25.7235	25.243	25.0352	25.6323	24.8302	25.0991	25.121	25.4389		30.446	282980000	14		tr|N0E4N6|N0E4N6_9MICO Elongation factor 4 OS=Tetrasphaera elongata Lp2 GN=lepA PE=3 SV=1
	0.636465	0.285791	N0E403	26.3566	26.4948	26.2767	26.7461	25.8939	25.8481	26.6264	26.3626		58.432	597380000	33		tr|N0E403|N0E403_9MICO Dihydrolipoyl dehydrogenase OS=Tetrasphaera elongata Lp2 GN=lpd PE=4 SV=1
	0.399517	0.284689	N0E349	24.8335	24.7585	24.6946	24.5247	23.9922	24.8943	24.9915	23.7944		25.057	153640000	11		tr|N0E349|N0E349_9MICO Uncharacterized protein OS=Tetrasphaera elongata Lp2 GN=BN10_520041 PE=4 SV=1
	1.51041	0.283136	N0E2P0	26.9306	26.9396	26.7479	26.5831	26.5362	26.6103	26.3599	26.5621		34.091	711860000	25		tr|N0E2P0|N0E2P0_9MICO DNA ligase OS=Tetrasphaera elongata Lp2 GN=BN10_810015 PE=4 SV=1
	0.601435	0.279911	N0DYT3	25.1554	25.1854	25.4683	25.1504	24.3615	25.0365	25.1489	25.293		53.255	269700000	21		tr|N0DYT3|N0DYT3_9MICO Uncharacterized protein OS=Tetrasphaera elongata Lp2 GN=BN10_1050006 PE=4 SV=1
	1.12637	0.278092	N0E2X9	31.7312	31.3763	31.912	31.4215	31.3074	31.2943	31.3699	31.3569		323.31	21874000000	369		tr|N0E2X9|N0E2X9_9MICO 50S ribosomal protein L10 OS=Tetrasphaera elongata Lp2 GN=rplJ PE=3 SV=1
	1.27228	0.278022	N0E511	34.8266	34.4496	34.821	34.5448	34.4852	34.1963	34.3984	34.4501		323.31	179610000000	1650		tr|N0E511|N0E511_9MICO 60 kDa chaperonin OS=Tetrasphaera elongata Lp2 GN=groL PE=3 SV=1
	1.26406	0.277591	N0E4H2	28.533	28.2593	28.5223	28.5237	28.1453	27.9706	28.179	28.4331		217.52	2404800000	76		tr|N0E4H2|N0E4H2_9MICO Dihydropteroate synthase OS=Tetrasphaera elongata Lp2 GN=folP PE=3 SV=1
	0.81087	0.276474	N0E669	31.4854	31.2131	31.5258	31.1965	31.3393	31.0776	31.2256	30.6725		323.31	17898000000	272		tr|N0E669|N0E669_9MICO 50S ribosomal protein L29 OS=Tetrasphaera elongata Lp2 GN=rpmC PE=3 SV=1
	0.777603	0.275383	N0E4R7	26.08	25.717	25.3638	25.8154	25.4704	25.5893	25.2041	25.6108		60.244	341260000	27		tr|N0E4R7|N0E4R7_9MICO Uncharacterized protein OS=Tetrasphaera elongata Lp2 GN=BN10_50011 PE=4 SV=1
	1.06391	0.274765	N0E5F5	28.7782	28.7924	29.0711	28.8656	28.6534	28.3546	28.5029	28.8975		305.54	3228500000	115		tr|N0E5F5|N0E5F5_9MICO Indole-3-glycerol phosphate synthase OS=Tetrasphaera elongata Lp2 GN=trpC PE=3 SV=1
	1.36262	0.273036	N0E2M1	30.3591	30.0585	29.9904	30.3325	29.7653	29.9958	29.9221	29.9651		323.31	8004100000	194		tr|N0E2M1|N0E2M1_9MICO o-succinylbenzoate synthase OS=Tetrasphaera elongata Lp2 GN=menC PE=3 SV=1
	1.05086	0.272008	N0E0Z2	26.5608	26.5107	26.0054	26.1892	26.0424	25.986	26.0864	26.0633		23.232	527820000	20		tr|N0E0Z2|N0E0Z2_9MICO Protoporphyrinogen oxidase OS=Tetrasphaera elongata Lp2 GN=BN10_620004 PE=4 SV=1
	1.29046	0.270252	N0DXC9	28.7632	28.6593	29.0287	28.6963	28.7251	28.3787	28.4863	28.4764		142.12	3086600000	97		tr|N0DXC9|N0DXC9_9MICO Uncharacterized protein OS=Tetrasphaera elongata Lp2 GN=BN10_1000004 PE=4 SV=1
	0.68946	0.269166	N0E6D6	25.5452	25.1045	25.1612	25.0961	24.9605	25.3599	24.6013	24.9086		65.716	231920000	12		tr|N0E6D6|N0E6D6_9MICO Putative hydrolase OS=Tetrasphaera elongata Lp2 GN=BN10_900045 PE=4 SV=1
	1.40346	0.268803	N0E339	30.219	29.8649	30.015	29.7726	29.6822	29.7192	29.622	29.7731		277.41	6598800000	155		tr|N0E339|N0E339_9MICO Uracil phosphoribosyltransferase OS=Tetrasphaera elongata Lp2 GN=upp PE=3 SV=1
	1.04083	0.267381	N0E6B3	28.1014	27.7516	28.172	27.9566	27.8694	27.5411	27.9132	27.5883		99.358	1900600000	59		tr|N0E6B3|N0E6B3_9MICO Uncharacterized transcriptional regulatory protein yxjL OS=Tetrasphaera elongata Lp2 GN=yxjL PE=4 SV=1
	0.817769	0.265332	N0E5W4	26.7656	26.8988	27.288	26.9063	26.8819	26.3747	26.6885	26.8523		71.201	842050000	50		tr|N0E5W4|N0E5W4_9MICO Uncharacterized protein OS=Tetrasphaera elongata Lp2 GN=BN10_650006 PE=4 SV=1
	0.862122	0.265295	N0E0X1	25.7733	26.1813	26.1104	26.0823	26.0404	25.4505	25.878	25.7172		95.848	442720000	29		tr|N0E0X1|N0E0X1_9MICO Putative ABC transporter ATP-binding subunit OS=Tetrasphaera elongata Lp2 GN=BN10_1600015 PE=3 SV=1
	0.511753	0.264728	N0DZ07	25.8379	25.7651	26.6781	25.7074	25.8734	25.6861	25.5759	25.7941		21.671	453930000	10		tr|N0DZ07|N0DZ07_9MICO Uncharacterized protein OS=Tetrasphaera elongata Lp2 GN=BN10_360030 PE=4 SV=1
	0.276964	0.264278	N0E191	25.4281	25.7455	25.417	25.6995	24.165	25.6559	25.568	25.8441		40.951	337260000	19		tr|N0E191|N0E191_9MICO Uncharacterized protein OS=Tetrasphaera elongata Lp2 GN=BN10_620018 PE=4 SV=1
	1.61076	0.262356	N0E1D6	27.2059	27.218	27.3205	27.1372	27.1653	26.8812	26.7974	26.9884		51.859	994880000	46		tr|N0E1D6|N0E1D6_9MICO Putative uroporphyrin-III C-methyltransferase/uroporphyrinogen-III synthase OS=Tetrasphaera elongata Lp2 GN=BN10_240004 PE=3 SV=1
	0.13412	0.259514	N0E513	25.5434	25.49	25.2824	23.3331	25.861	24.7771	24.5631	23.4097		14.698	335660000	12		tr|N0E513|N0E513_9MICO Putative Type I site-specific deoxyribonuclease OS=Tetrasphaera elongata Lp2 GN=hsdR PE=4 SV=1
	0.829132	0.258742	N0E0S2	27.1438	26.7812	27.1151	26.8823	26.7528	26.3664	26.7895	26.9786		48.301	908020000	30		tr|N0E0S2|N0E0S2_9MICO Uncharacterized protein OS=Tetrasphaera elongata Lp2 GN=BN10_590004 PE=4 SV=1
	1.1696	0.258255	N0E4J2	29.3505	28.9915	29.3189	29.0576	29.0071	29.0712	28.8543	28.7529		191.03	4098800000	143		tr|N0E4J2|N0E4J2_9MICO Adenylosuccinate synthetase OS=Tetrasphaera elongata Lp2 GN=purA PE=3 SV=1
	0.95132	0.257632	N0E1T8	31.5523	31.4201	31.4048	31.2335	31.0322	31.5022	30.9589	31.087		323.31	17972000000	261		tr|N0E1T8|N0E1T8_9MICO 30S ribosomal protein S15 OS=Tetrasphaera elongata Lp2 GN=rpsO PE=3 SV=1
	1.39631	0.256085	N0E4B6	33.6206	33.6566	33.7996	33.7064	33.7064	33.3783	33.3092	33.365		323.31	92293000000	1219		tr|N0E4B6|N0E4B6_9MICO Phosphoenolpyruvate carboxykinase [GTP] OS=Tetrasphaera elongata Lp2 GN=pckG PE=3 SV=1
	0.843452	0.255126	N0E4H1	31.4791	31.4015	31.7315	31.4642	31.0938	31.0614	31.6411	31.2594		323.31	20147000000	357		tr|N0E4H1|N0E4H1_9MICO Nucleoside diphosphate kinase OS=Tetrasphaera elongata Lp2 GN=ndk PE=3 SV=1
	1.29116	0.25363	N0E183	27.7268	27.3172	27.365	27.4189	27.2844	27.2724	27.0741	27.1825		130.01	1195500000	36		tr|N0E183|N0E183_9MICO Uncharacterized protein OS=Tetrasphaera elongata Lp2 GN=BN10_1730022 PE=4 SV=1
	1.09138	0.251663	N0E2Y4	30.7764	30.7204	31.1579	30.7118	30.5808	30.7504	30.5108	30.5178		323.31	12307000000	251		tr|N0E2Y4|N0E2Y4_9MICO Putative aminotransferase MSMEG_6286 OS=Tetrasphaera elongata Lp2 GN=BN10_840006 PE=4 SV=1
	0.725643	0.250286	N0E5Y8	26.9226	27.2652	27.4562	27.3726	27.2449	26.6788	27.1119	26.9799		100.19	1091200000	64		tr|N0E5Y8|N0E5Y8_9MICO Protein RecA OS=Tetrasphaera elongata Lp2 GN=recA PE=3 SV=1
	0.4192	0.250251	N0E0W2	24.4193	24.5787	24.0016	24.5471	24.5426	24.1071	23.5054	24.3906		20.572	132940000	8		tr|N0E0W2|N0E0W2_9MICO DNA helicase OS=Tetrasphaera elongata Lp2 GN=BN10_1070004 PE=4 SV=1
	0.769991	0.248675	N0E402	25.861	25.6802	25.5123	25.9025	25.3399	25.1957	25.7103	25.7155		23.26	399930000	19		tr|N0E402|N0E402_9MICO MerR family transcriptional regulator OS=Tetrasphaera elongata Lp2 GN=BN10_590027 PE=4 SV=1
	1.5944	0.248326	N0E600	27.4011	27.3172	27.5252	27.2104	27.0264	27.0374	27.1548	27.242		103.28	1232700000	44		tr|N0E600|N0E600_9MICO Heat-inducible transcription repressor HrcA OS=Tetrasphaera elongata Lp2 GN=hrcA PE=3 SV=1
	1.21548	0.248197	N0DXI1	29.6395	29.4699	29.8811	29.4555	29.4302	29.25	29.4263	29.3465		323.31	5563900000	142		tr|N0DXI1|N0DXI1_9MICO Aspartokinase OS=Tetrasphaera elongata Lp2 GN=ask PE=3 SV=1
	0.480084	0.247829	N0E2M2	25.714	25.5814	25.5749	25.3329	25.5206	24.6414	25.5208	25.5291		14.756	327420000	15		tr|N0E2M2|N0E2M2_9MICO Putative dioxygenase OS=Tetrasphaera elongata Lp2 GN=BN10_820024 PE=4 SV=1
	1.6472	0.247772	N0DYZ8	27.808	27.9336	27.9013	28.0583	27.8088	27.7594	27.5554	27.5865		59.373	1614000000	53		tr|N0DYZ8|N0DYZ8_9MICO Putative cytochrome c oxidase subunit 2 OS=Tetrasphaera elongata Lp2 GN=ctaC PE=4 SV=1
	1.17803	0.247689	N0E4R2	34.9127	34.5638	34.9734	34.6994	34.6216	34.3714	34.5822	34.5835		323.31	200250000000	1850		tr|N0E4R2|N0E4R2_9MICO 60 kDa chaperonin OS=Tetrasphaera elongata Lp2 GN=groL PE=3 SV=1
	1.62523	0.247689	N0E1S2	27.1053	26.918	27.2144	26.9529	26.762	26.6903	26.8761	26.8714		84.515	915090000	29		tr|N0E1S2|N0E1S2_9MICO Uncharacterized protein OS=Tetrasphaera elongata Lp2 GN=BN10_700004 PE=4 SV=1
	1.10939	0.245651	N0E370	28.5411	28.3425	28.7585	28.522	28.4601	28.2323	28.3805	28.1085		146.78	2572100000	97		tr|N0E370|N0E370_9MICO Succinyl CoA:3-oxoacid CoA-transferase (Subunit B) OS=Tetrasphaera elongata Lp2 GN=scoB PE=4 SV=1
	1.09857	0.244723	N0E494	30.3086	29.8731	30.1307	29.8307	29.8686	29.7772	29.7882	29.7301		225.1	7238800000	128		tr|N0E494|N0E494_9MICO Gamma-glutamyl phosphate reductase OS=Tetrasphaera elongata Lp2 GN=proA PE=3 SV=1
	1.4204	0.244649	N0DXK5	27.2155	27.097	27.0925	26.9061	27.0282	26.7647	26.8045	26.7351		54.674	937400000	49		tr|N0DXK5|N0DXK5_9MICO Putative Heat shock protein 70 OS=Tetrasphaera elongata Lp2 GN=BN10_1050007 PE=4 SV=1
	0.778635	0.244491	N0E437	27.5515	27.4192	27.5744	27.3056	26.8761	27.5558	27.296	27.1448		89.837	1215600000	51		tr|N0E437|N0E437_9MICO Uncharacterized protein OS=Tetrasphaera elongata Lp2 GN=BN10_600003 PE=4 SV=1
	0.534873	0.243936	N0E221	23.7811	23.7871	24.0467	23.7663	23.1797	23.4016	23.7253	24.0988		16.827	93383000	7		tr|N0E221|N0E221_9MICO Uncharacterized protein OS=Tetrasphaera elongata Lp2 GN=BN10_1270002 PE=4 SV=1
	0.903883	0.24226	N0E5R4	27.9128	27.7974	27.7157	27.6447	27.8092	27.222	27.4688	27.6015		65.526	1539900000	46		tr|N0E5R4|N0E5R4_9MICO Uncharacterized protein OS=Tetrasphaera elongata Lp2 GN=BN10_940003 PE=4 SV=1
	1.46197	0.242142	N0DYJ6	29.6004	29.3093	29.7236	29.4873	29.3157	29.2559	29.2983	29.2822		178.89	5011100000	93		tr|N0DYJ6|N0DYJ6_9MICO Riboflavin biosynthesis protein OS=Tetrasphaera elongata Lp2 GN=ribF PE=3 SV=1
	1.1592	0.242053	N0E0D6	28.3611	28.6214	28.7883	28.6072	28.3035	28.286	28.5476	28.2726		228.67	2807300000	95		tr|N0E0D6|N0E0D6_9MICO Dihydroxy-acid dehydratase OS=Tetrasphaera elongata Lp2 GN=ilvD PE=3 SV=1
	1.43944	0.241081	N0E0G4	28.9224	28.7683	28.8164	28.8565	28.6512	28.3628	28.6291	28.7561		234.71	3127200000	115		tr|N0E0G4|N0E0G4_9MICO Biotin synthase OS=Tetrasphaera elongata Lp2 GN=bioB PE=3 SV=1
	0.637009	0.240585	N0E3D0	29.0847	28.3852	28.9561	28.6372	28.6642	28.2704	28.5738	28.5925		103.57	3065100000	44		tr|N0E3D0|N0E3D0_9MICO Putative iron-siderophore ABC transporter (ATP-binding protein) OS=Tetrasphaera elongata Lp2 GN=yclP PE=3 SV=1
	0.342156	0.240527	N0E063	24.9061	25.189	25.6626	25.5199	25.5768	24.3899	25.1488	25.2001		68	286440000	13		tr|N0E063|N0E063_9MICO Uncharacterized protein OS=Tetrasphaera elongata Lp2 GN=BN10_560026 PE=4 SV=1
	1.555	0.239589	N0E5N9	31.1823	31.084	30.8486	31.1271	30.9128	30.7325	30.7899	30.8484		323.31	14361000000	260		tr|N0E5N9|N0E5N9_9MICO Branched-chain-amino-acid aminotransferase OS=Tetrasphaera elongata Lp2 GN=ilvE PE=3 SV=1
	0.557144	0.238817	N0DXP6	27.2464	27.0205	27.6955	27.1606	27.1102	27.2341	27.1843	26.6392		113.89	1062800000	44		tr|N0DXP6|N0DXP6_9MICO Uncharacterized protein OS=Tetrasphaera elongata Lp2 GN=BN10_1080005 PE=4 SV=1
	1.36586	0.238587	N0E3Q8	31.4544	31.2072	31.2666	31.1083	31.0656	31.1592	30.9655	30.8919		323.31	16577000000	335		tr|N0E3Q8|N0E3Q8_9MICO dTDP-glucose 4,6-dehydratase OS=Tetrasphaera elongata Lp2 GN=spsJ PE=3 SV=1
	1.26531	0.237859	N0E3U3	32.2768	32.0914	32.3446	32.1016	31.909	32.1933	31.8543	31.9063		323.31	32019000000	491		tr|N0E3U3|N0E3U3_9MICO Electron transfer flavoprotein subunit alpha OS=Tetrasphaera elongata Lp2 GN=etfA PE=4 SV=1
	1.33107	0.232723	N0E4J6	27.8054	27.5865	27.7981	27.7946	27.6939	27.5828	27.3606	27.4165		127.33	1604500000	69		tr|N0E4J6|N0E4J6_9MICO tRNA-2-methylthio-N(6)-dimethylallyladenosine synthase OS=Tetrasphaera elongata Lp2 GN=miaB PE=3 SV=1
	1.45928	0.230694	N0E0D9	30.4036	30.1648	30.2245	30.2893	30.0432	30.0077	29.8906	30.218		323.31	8920900000	215		tr|N0E0D9|N0E0D9_9MICO Glutamyl-tRNA(Gln) amidotransferase subunit A OS=Tetrasphaera elongata Lp2 GN=gatA PE=3 SV=1
	0.691643	0.229887	N0E244	33.5229	33.5519	33.7248	33.7981	33.7653	33.4308	33.4342	33.0479		323.31	89655000000	448		tr|N0E244|N0E244_9MICO 50S ribosomal protein L30 OS=Tetrasphaera elongata Lp2 GN=rpmD PE=3 SV=1
	0.755602	0.229499	N0E1H3	26.444	26.7358	26.7758	26.8993	26.76	26.3602	26.572	26.2447		69.565	709150000	39		tr|N0E1H3|N0E1H3_9MICO Probable cytosol aminopeptidase OS=Tetrasphaera elongata Lp2 GN=pepA PE=3 SV=1
	0.476295	0.228276	N0E015	23.972	24.0392	24.3574	24.2583	23.6386	23.8424	24.5076	23.7252		9.9881	108730000	8		tr|N0E015|N0E015_9MICO UDP-glucose 6-dehydrogenase OS=Tetrasphaera elongata Lp2 GN=ugd PE=3 SV=1
	0.96904	0.228134	N0E261	27.5735	27.6901	27.6157	27.5408	27.7058	27.2519	27.1815	27.3684		91.811	1359200000	60		tr|N0E261|N0E261_9MICO Uroporphyrinogen III methyltransferase OS=Tetrasphaera elongata Lp2 GN=BN10_340002 PE=4 SV=1
	0.782884	0.228055	N0DYS2	28.0636	27.7919	27.8338	27.5685	27.7513	27.7761	27.4054	27.4127		111.11	1592300000	58		tr|N0DYS2|N0DYS2_9MICO Recombination protein RecR OS=Tetrasphaera elongata Lp2 GN=recR PE=3 SV=1
	0.677788	0.227091	N0E1A1	27.7171	27.1952	27.9382	27.4983	27.2639	27.3988	27.3946	27.3829		78.928	1441200000	35		tr|N0E1A1|N0E1A1_9MICO Uncharacterized tRNA/rRNA methyltransferase Mkms_4822 OS=Tetrasphaera elongata Lp2 GN=BN10_1100003 PE=4 SV=1
	0.450892	0.226799	N0E1F4	26.3747	26.2212	26.7206	26.7812	26.6484	25.794	26.324	26.4241		66.817	684590000	37		tr|N0E1F4|N0E1F4_9MICO DNA translocase ftsK OS=Tetrasphaera elongata Lp2 GN=ftsK PE=4 SV=1
	1.3352	0.226122	N0DYA9	32.5982	32.2553	32.4575	32.2627	32.1487	32.0774	32.1967	32.2464		323.31	37196000000	446		tr|N0DYA9|N0DYA9_9MICO Elongation factor Ts OS=Tetrasphaera elongata Lp2 GN=tsf PE=3 SV=1
	0.817375	0.225057	N0DXQ8	28.6864	28.3122	28.6922	28.4421	28.4558	28.0174	28.423	28.3364		108.32	2667700000	86		tr|N0DXQ8|N0DXQ8_9MICO Enoyl-[acyl-carrier-protein] reductase [NADH] OS=Tetrasphaera elongata Lp2 GN=inhA PE=3 SV=1
	0.66518	0.224815	N0E151	26.8566	26.3221	26.2462	26.2234	26.3439	26.21	26.0362	26.159		25.743	580220000	39		tr|N0E151|N0E151_9MICO Uncharacterized protein OS=Tetrasphaera elongata Lp2 GN=BN10_1730023 PE=4 SV=1
	0.698935	0.224589	N0E2I9	25.8795	25.8084	25.6268	25.4494	25.719	25.1315	25.5283	25.4869		33.477	351520000	14		tr|N0E2I9|N0E2I9_9MICO MOSC domain containing protein OS=Tetrasphaera elongata Lp2 GN=BN10_460046 PE=4 SV=1
	0.402817	0.222307	N0E4T5	28.8453	29.081	29.213	29.0948	29.0555	28.1449	29.07	29.0744		164.74	3732100000	89		tr|N0E4T5|N0E4T5_9MICO 4-hydroxy-tetrahydrodipicolinate reductase OS=Tetrasphaera elongata Lp2 GN=dapB PE=3 SV=1
	0.537655	0.220402	N0E4S4	25.4503	25.4893	24.694	25.2907	24.9056	24.9675	25.0506	25.1189		52.891	274640000	14		tr|N0E4S4|N0E4S4_9MICO Putative D-alanyl-D-alanine carboxypeptidase OS=Tetrasphaera elongata Lp2 GN=BN10_70003 PE=4 SV=1
	1.42243	0.21998	N0DZJ6	30.1878	30.1114	30.3917	30.2419	29.8577	30.0655	30.1283	30.0014		323.31	8568800000	259		tr|N0DZJ6|N0DZJ6_9MICO Dihydrolipoamide dehydrogenase OS=Tetrasphaera elongata Lp2 GN=lpdA PE=3 SV=1
	0.988643	0.21791	N0E0Z3	29.4819	29.0402	29.3854	29.1099	28.9332	29.0446	29.1224	29.0455		237.78	4119800000	104		tr|N0E0Z3|N0E0Z3_9MICO Uridylate kinase OS=Tetrasphaera elongata Lp2 GN=pyrH PE=3 SV=1
	1.34711	0.217518	N0DXR2	28.3313	28.2067	28.2079	28.2932	28.0859	28.2235	28.0225	27.837		155.58	2371100000	112		tr|N0DXR2|N0DXR2_9MICO Putative secreted protein OS=Tetrasphaera elongata Lp2 GN=BN10_1080045 PE=4 SV=1
	0.768822	0.217455	N0E5W7	26.5727	26.3916	26.8108	26.5286	26.6409	26.2245	26.1543	26.4142		79.288	719460000	34		tr|N0E5W7|N0E5W7_9MICO 1-acyl-sn-glycerol-3-phosphate acyltransferase OS=Tetrasphaera elongata Lp2 GN=BN10_650011 PE=3 SV=1
	1.71378	0.215137	N0E4S5	30.6419	30.5263	30.449	30.4666	30.3486	30.4296	30.1954	30.2495		323.31	10172000000	259		tr|N0E4S5|N0E4S5_9MICO CTP synthase OS=Tetrasphaera elongata Lp2 GN=pyrG PE=3 SV=1
	0.145894	0.212927	N0E1R6	25.0601	23.5739	24.5669	24.8089	24.4389	22.9834	24.7385	24.9973		13.604	209670000	6		tr|N0E1R6|N0E1R6_9MICO Uncharacterized protein OS=Tetrasphaera elongata Lp2 GN=BN10_680048 PE=4 SV=1
	1.06453	0.212807	N0E4P4	32.0844	32.1069	32.0797	32.1431	31.798	32.1975	31.7595	31.8079		323.31	30709000000	527		tr|N0E4P4|N0E4P4_9MICO 50S ribosomal protein L9 OS=Tetrasphaera elongata Lp2 GN=rplI PE=3 SV=1
	0.884638	0.21256	N0DY34	29.0701	28.8151	29.0358	28.8983	28.561	29.0449	28.716	28.6472		305.51	3245400000	161		tr|N0DY34|N0DY34_9MICO Putative excision nuclease ABC subunit OS=Tetrasphaera elongata Lp2 GN=BN10_130056 PE=3 SV=1
	0.168903	0.209936	N0DZU3	24.9071	24.2597	24.5598	23.929	24.6874	25.1323	23.7821	23.2141		25.396	162290000	15		tr|N0DZU3|N0DZU3_9MICO Coenzyme F390 synthetase OS=Tetrasphaera elongata Lp2 GN=BN10_1240004 PE=4 SV=1
	1.56053	0.209731	N0E041	28.7376	28.7455	28.7273	28.6248	28.5345	28.3063	28.5414	28.614		298.58	3041400000	109		tr|N0E041|N0E041_9MICO Uncharacterized protein OS=Tetrasphaera elongata Lp2 GN=BN10_1300006 PE=4 SV=1
	0.0783758	0.208324	N0DZZ9	27.2208	23.6443	27.1163	26.5813	26.2864	24.6055	26.6253	26.2123		29.743	725500000	9		tr|N0DZZ9|N0DZZ9_9MICO Uncharacterized protein OS=Tetrasphaera elongata Lp2 GN=BN10_130009 PE=4 SV=1
	1.16385	0.207686	N0E018	33.8431	33.8078	33.6892	33.7782	33.7786	33.6286	33.5166	33.3636		323.31	95178000000	983		tr|N0E018|N0E018_9MICO 50S ribosomal protein L17 OS=Tetrasphaera elongata Lp2 GN=rplQ PE=3 SV=1
	0.77509	0.206765	N0E2V0	28.618	28.6362	28.8222	28.7337	28.6471	28.7606	28.3199	28.2554		164.83	2951400000	111		tr|N0E2V0|N0E2V0_9MICO Putative Delta-1-pyrroline-5-carboxylate dehydrogenase, mitochondrial OS=Tetrasphaera elongata Lp2 GN=BN10_520012 PE=3 SV=1
	0.439912	0.202835	N0E2M0	26.7033	27.0907	26.7903	27.2186	26.9616	26.252	26.8999	26.8782		54.774	870400000	22		tr|N0E2M0|N0E2M0_9MICO Putative enzyme OS=Tetrasphaera elongata Lp2 GN=BN10_1360001 PE=4 SV=1
	1.22478	0.202103	N0E4H3	29.2859	29.014	29.0596	29.1162	29.0907	28.9298	28.8019	28.8449		269.7	3888700000	99		tr|N0E4H3|N0E4H3_9MICO Putative Ferrodoxin oxidoreductase beta subunit (Putative pyruvate synthase (PorB)) OS=Tetrasphaera elongata Lp2 GN=BN10_460015 PE=4 SV=1
	0.155609	0.201847	N0E2D1	23.9799	24.9867	26.0758	25.4048	24.5938	25.2851	25.3345	24.4263		22.344	332430000	13		tr|N0E2D1|N0E2D1_9MICO Nitrilase/cyanide hydratase and apolipoprotein N-acyltransferase OS=Tetrasphaera elongata Lp2 GN=BN10_430001 PE=4 SV=1
	1.56393	0.198605	N0E0T8	31.6968	31.4362	31.561	31.4627	31.2413	31.3619	31.4032	31.3558		323.31	20528000000	362		tr|N0E0T8|N0E0T8_9MICO Ribosome-recycling factor OS=Tetrasphaera elongata Lp2 GN=frr PE=3 SV=1
	0.248468	0.198219	N0DXY2	24.5589	25.1832	25.2092	25.8069	24.6729	24.7284	25.5549	25.0092		36.862	268510000	10		tr|N0DXY2|N0DXY2_9MICO Uncharacterized protein OS=Tetrasphaera elongata Lp2 GN=BN10_1210013 PE=4 SV=1
	0.653248	0.197986	N0E1I1	27.0331	27.1782	27.4293	27.3661	27.2683	26.7498	27.0163	27.1804		85.576	1127300000	40		tr|N0E1I1|N0E1I1_9MICO Homoserine kinase OS=Tetrasphaera elongata Lp2 GN=thrB PE=3 SV=1
	0.668759	0.196019	N0E0V1	24.8135	25.0831	25.1279	25.0711	24.7118	24.8758	25.1451	24.5788		48.882	246050000	18		tr|N0E0V1|N0E0V1_9MICO L-arabinose ABC transporter, permease protein OS=Tetrasphaera elongata Lp2 GN=BN10_1590043 PE=4 SV=1
	0.291208	0.194886	N0DYF9	29.0688	29.0595	29.1478	28.8102	28.9457	28.0364	29.2245	29.1001		89.804	3837800000	44		tr|N0DYF9|N0DYF9_9MICO Uncharacterized protein OS=Tetrasphaera elongata Lp2 GN=BN10_1550003 PE=4 SV=1
	0.857554	0.193892	N0E6H3	26.5571	26.6918	26.5125	26.8727	26.6866	26.3123	26.4566	26.4029		55.059	753810000	29		tr|N0E6H3|N0E6H3_9MICO Uncharacterized protein OS=Tetrasphaera elongata Lp2 GN=BN10_990019 PE=4 SV=1
	0.633294	0.192317	N0DZG6	26.774	26.8556	26.9859	26.6443	26.4443	26.4248	26.9665	26.6548		144.7	838680000	39		tr|N0DZG6|N0DZG6_9MICO Uncharacterized protein OS=Tetrasphaera elongata Lp2 GN=BN10_1180006 PE=4 SV=1
	1.34301	0.189612	N0DZ46	28.9599	29.1897	28.926	28.9501	28.7299	28.9318	28.7759	28.8297		244.05	3719700000	141		tr|N0DZ46|N0DZ46_9MICO Transketolase OS=Tetrasphaera elongata Lp2 GN=tkt PE=4 SV=1
	0.542776	0.188258	N0E2M4	26.7908	26.3698	26.9015	26.615	26.7223	26.284	26.6195	26.2982		41.724	754890000	33		tr|N0E2M4|N0E2M4_9MICO Uncharacterized protein OS=Tetrasphaera elongata Lp2 GN=BN10_800031 PE=3 SV=1
	0.90961	0.188166	N0E281	29.5415	29.3485	29.7176	29.3735	29.4142	29.264	29.3952	29.155		193.92	5235200000	155		tr|N0E281|N0E281_9MICO Peroxiredoxin OS=Tetrasphaera elongata Lp2 GN=lsfA PE=4 SV=1
	0.658797	0.186397	N0E0F9	29.0345	28.7051	29.2154	28.7713	28.8651	28.7437	28.813	28.5589		131.87	3493900000	121		tr|N0E0F9|N0E0F9_9MICO Uncharacterized protein OS=Tetrasphaera elongata Lp2 GN=BN10_560070 PE=4 SV=1
	0.827705	0.186389	N0E588	28.0005	27.574	27.7735	27.517	27.458	27.5497	27.5333	27.5785		84.15	1488700000	47		tr|N0E588|N0E588_9MICO Uncharacterized protein OS=Tetrasphaera elongata Lp2 GN=BN10_560062 PE=4 SV=1
	0.412264	0.186152	N0E398	25.7501	25.4401	26.3663	25.8849	25.6381	25.8269	25.6418	25.5899		49.62	432460000	29		tr|N0E398|N0E398_9MICO Uncharacterized LmbE-like protein OS=Tetrasphaera elongata Lp2 GN=BN10_540005 PE=4 SV=1
	0.537352	0.185625	N0E1I4	23.8884	24.0728	24.5033	24.472	23.9402	24.137	24.139	23.9778		14.654	106730000	13		tr|N0E1I4|N0E1I4_9MICO Putative enoyl-CoA hydratase echA8 (FadB) OS=Tetrasphaera elongata Lp2 GN=BN10_650009 PE=3 SV=1
	1.46117	0.184816	N0E3L4	28.114	27.866	28.0135	28.0196	27.8847	27.7618	27.7236	27.9037		130.45	1793800000	72		tr|N0E3L4|N0E3L4_9MICO Uncharacterized protein OS=Tetrasphaera elongata Lp2 GN=BN10_990028 PE=4 SV=1
	0.580029	0.184696	N0E5C0	28.8209	28.3311	28.5936	28.2419	28.2853	28.2798	28.1715	28.5123		202.37	2511600000	81		tr|N0E5C0|N0E5C0_9MICO Aspartyl/glutamyl-tRNA(Asn/Gln) amidotransferase subunit B OS=Tetrasphaera elongata Lp2 GN=gatB PE=3 SV=1
	1.10845	0.18447	N0E3T7	30.5691	30.325	30.519	30.3167	30.3258	30.0938	30.344	30.2281		323.31	9654500000	264		tr|N0E3T7|N0E3T7_9MICO Trk system potassium uptake protein trkA OS=Tetrasphaera elongata Lp2 GN=trkA PE=4 SV=1
	0.43131	0.184318	N0E6G4	25.5432	25.5934	26.1756	25.6309	25.6161	25.8608	25.4054	25.3234		57.508	379820000	16		tr|N0E6G4|N0E6G4_9MICO Uncharacterized protein OS=Tetrasphaera elongata Lp2 GN=BN10_970004 PE=4 SV=1
	0.125293	0.184152	N0E3K8	23.7608	23.6395	24.4481	24.3537	24.1749	24.66	22.3661	24.2645		19.021	91298000	7		tr|N0E3K8|N0E3K8_9MICO Thymidylate kinase OS=Tetrasphaera elongata Lp2 GN=tmk PE=3 SV=1
	0.397038	0.184003	N0E2F8	27.6473	28.2247	27.4427	28.2078	27.6115	27.6359	27.7251	27.814		59.306	1595300000	19		tr|N0E2F8|N0E2F8_9MICO NADH-quinone oxidoreductase subunit L OS=Tetrasphaera elongata Lp2 GN=nuoL PE=4 SV=1
	0.601595	0.183326	N0E4H4	31.4674	31.6499	31.5933	31.9674	31.2104	31.6564	31.5757	31.502		323.31	22958000000	461		tr|N0E4H4|N0E4H4_9MICO Dihydrolipoyl dehydrogenase OS=Tetrasphaera elongata Lp2 GN=lpd PE=4 SV=1
	0.131146	0.179753	N0E4M7	24.318	24.4736	25.0179	24.3649	25.3319	23.0107	24.4198	24.6929		12.709	186470000	8		tr|N0E4M7|N0E4M7_9MICO 2-succinyl-5-enolpyruvyl-6-hydroxy-3-cyclohexene-1-carboxylate synthase OS=Tetrasphaera elongata Lp2 GN=menD PE=3 SV=1
	1.1357	0.179167	N0E3F5	31.8194	31.5225	31.6981	31.5173	31.5044	31.5445	31.4043	31.3876		323.31	22685000000	559		tr|N0E3F5|N0E3F5_9MICO Leucine--tRNA ligase OS=Tetrasphaera elongata Lp2 GN=leuS PE=3 SV=1
	0.711552	0.177811	N0E4Y5	33.7194	33.581	33.1893	33.4432	33.3431	33.2217	33.4149	33.242		323.31	78360000000	473		tr|N0E4Y5|N0E4Y5_9MICO 50S ribosomal protein L18 OS=Tetrasphaera elongata Lp2 GN=rplR PE=3 SV=1
	0.316191	0.177206	N0E604	26.5866	27.0568	26.8724	27.0967	27.0193	26.1771	26.6396	27.0677		53.683	790160000	21		tr|N0E604|N0E604_9MICO Uncharacterized protein OS=Tetrasphaera elongata Lp2 GN=BN10_680090 PE=4 SV=1
	0.12756	0.17687	N0E473	25.6996	25.937	26.1554	25.9572	24.287	25.8944	26.6007	26.2596		48.673	493440000	17		tr|N0E473|N0E473_9MICO RecBCD enzyme subunit RecC OS=Tetrasphaera elongata Lp2 GN=recC PE=3 SV=1
	1.37288	0.175508	N0DZ61	31.6329	31.6281	31.6174	31.5226	31.4848	31.4511	31.5226	31.2405		323.31	21607000000	359		tr|N0DZ61|N0DZ61_9MICO Uncharacterized protein OS=Tetrasphaera elongata Lp2 GN=BN10_1080018 PE=4 SV=1
	0.41451	0.175038	N0E5Q1	26.0137	26.6514	26.0221	26.4589	26.0955	26.2494	25.8443	26.2567		36.725	536200000	33		tr|N0E5Q1|N0E5Q1_9MICO 3-isopropylmalate dehydratase large subunit OS=Tetrasphaera elongata Lp2 GN=leuC PE=3 SV=1
	0.772906	0.17366	N0E0V9	28.4107	28.3525	28.2809	28.23	28.3577	28.0728	27.8894	28.2596		127.48	2345000000	64		tr|N0E0V9|N0E0V9_9MICO Anthranilate synthase component 2 OS=Tetrasphaera elongata Lp2 GN=trpG PE=4 SV=1
	0.414402	0.172977	N0DZT3	24.481	24.2301	24.5327	24.2838	24.716	24.0147	24.0405	24.0646		13.916	130880000	12		tr|N0DZT3|N0DZT3_9MICO Putative transcriptional regulator OS=Tetrasphaera elongata Lp2 GN=BN10_1260020 PE=4 SV=1
	1.13046	0.171976	N0E2B8	30.573	30.6272	30.587	30.3775	30.2832	30.485	30.2608	30.4479		257.94	10275000000	134		tr|N0E2B8|N0E2B8_9MICO Putative Carbonic anhydrase OS=Tetrasphaera elongata Lp2 GN=BN10_130063 PE=4 SV=1
	1.13668	0.170324	N0E0U5	29.6914	29.9596	29.8419	29.964	29.7682	29.7136	29.5629	29.731		323.31	6608200000	243		tr|N0E0U5|N0E0U5_9MICO Putative 2-oxoglutarate decarboxylase, component of the 2-oxoglutarate dehydrogenase complex (E1) (SucA) OS=Tetrasphaera elongata Lp2 GN=BN10_1470003 PE=4 SV=1
	0.232236	0.169914	N0E5X8	24.5577	24.6508	24.4786	24.6329	24.5675	23.9634	23.9379	25.1716		6.6206	163930000	12		tr|N0E5X8|N0E5X8_9MICO Putative dtdp-glucose 4,6-dehydratase transmembrane protein OS=Tetrasphaera elongata Lp2 GN=BN10_670014 PE=4 SV=1
	0.282616	0.168972	N0E1E9	26.7179	26.6053	26.6701	26.8962	26.7605	26.001	27.1041	26.3479		44.864	775390000	21		tr|N0E1E9|N0E1E9_9MICO Putative serine/threonine-protein kinase pknG OS=Tetrasphaera elongata Lp2 GN=pknG PE=4 SV=1
	0.651456	0.168851	N0DZT1	26.4713	26.1532	26.3353	26.3462	25.9468	26.0463	26.4309	26.2067		107.81	560670000	30		tr|N0DZT1|N0DZT1_9MICO Glycosyl transferase OS=Tetrasphaera elongata Lp2 GN=BN10_520049 PE=4 SV=1
	1.16759	0.168576	N0DYJ7	29.7311	29.5651	29.6708	29.523	29.3262	29.593	29.5031	29.3935		178.16	5658200000	140		tr|N0DYJ7|N0DYJ7_9MICO Glutamine-dependent NAD(+) synthetase OS=Tetrasphaera elongata Lp2 GN=nadE PE=4 SV=1
	1.06804	0.16784	N0E227	25.4085	25.0836	25.2354	25.3131	25.1553	25.1447	24.9639	25.1054		25.259	271330000	13		tr|N0E227|N0E227_9MICO Uncharacterized protein OS=Tetrasphaera elongata Lp2 GN=BN10_1270007 PE=4 SV=1
	0.184406	0.167496	N0DXM5	24.9678	25.536	25.1555	25.5668	25.1306	24.2266	25.6163	25.5827		47.973	279500000	19		tr|N0DXM5|N0DXM5_9MICO Dihydrodipicolinate synthase/N-acetylneuraminate lyase OS=Tetrasphaera elongata Lp2 GN=BN10_120045 PE=3 SV=1
	0.628656	0.166356	N0E601	28.3367	28.1612	28.2412	28.0872	27.745	28.2772	28.1444	27.9944		139.84	2056100000	71		tr|N0E601|N0E601_9MICO Uncharacterized protein OS=Tetrasphaera elongata Lp2 GN=BN10_680075 PE=4 SV=1
	0.852161	0.164954	N0E680	26.5264	26.3181	26.4465	26.2069	26.3442	26.1739	26.2814	26.0386		42.437	652510000	30		tr|N0E680|N0E680_9MICO tRNA N6-adenosine threonylcarbamoyltransferase OS=Tetrasphaera elongata Lp2 GN=tsaD PE=3 SV=1
	0.657515	0.163326	N0E1M1	27.7411	27.9106	27.8085	27.8527	27.8912	27.3485	27.7042	27.7157		54.195	1631700000	53		tr|N0E1M1|N0E1M1_9MICO Probable S-methyl-5-thioinosine phosphorylase OS=Tetrasphaera elongata Lp2 GN=mtnP PE=3 SV=1
	0.669741	0.163121	N0E0D5	29.1339	29.2809	29.601	29.3964	29.2436	29.0049	29.2943	29.2169		317.26	4659900000	139		tr|N0E0D5|N0E0D5_9MICO Uncharacterized protein OS=Tetrasphaera elongata Lp2 GN=BN10_570035 PE=4 SV=1
	0.399299	0.162724	N0DZ34	24.772	24.873	24.9888	24.8166	24.8982	24.2099	24.9815	24.7099		35.506	232840000	14		tr|N0DZ34|N0DZ34_9MICO Protein-tyrosine phosphatase, low molecular weight OS=Tetrasphaera elongata Lp2 GN=BN10_420004 PE=4 SV=1
	1.47272	0.161569	N0DZJ9	31.6983	31.6562	31.6947	31.8085	31.4655	31.5073	31.6909	31.5478		323.31	23571000000	355		tr|N0DZJ9|N0DZJ9_9MICO Glucose-6-phosphate isomerase OS=Tetrasphaera elongata Lp2 GN=pgi PE=3 SV=1
	1.15329	0.160392	N0E1L6	29.4537	29.5811	29.332	29.5852	29.3389	29.2378	29.2999	29.4338		323.31	5196000000	177		tr|N0E1L6|N0E1L6_9MICO Aspartate-semialdehyde dehydrogenase OS=Tetrasphaera elongata Lp2 GN=asd PE=3 SV=1
	0.161242	0.159772	N0DXZ6	24.3987	23.5854	24.9353	24.5225	23.5815	23.9913	24.7047	24.5253		19.413	170330000	6		tr|N0DXZ6|N0DXZ6_9MICO Uncharacterized protein OS=Tetrasphaera elongata Lp2 GN=BN10_1240011 PE=4 SV=1
	0.629453	0.159678	N0E5U7	29.385	29.4109	29.7276	29.525	29.398	29.0804	29.4834	29.448		296.21	5172300000	116		tr|N0E5U7|N0E5U7_9MICO Dihydroorotate dehydrogenase electron transfer subunit OS=Tetrasphaera elongata Lp2 GN=BN10_980010 PE=4 SV=1
	0.293064	0.158179	N0E2G3	26.7235	25.9777	26.7017	26.4456	26.5513	26.525	26.1917	25.9479		37.767	622530000	18		tr|N0E2G3|N0E2G3_9MICO Uncharacterized protein OS=Tetrasphaera elongata Lp2 GN=BN10_780004 PE=4 SV=1
	0.587687	0.157643	N0DZM5	28.1129	27.6593	27.8419	27.6672	27.7072	27.7503	27.4597	27.7335		184.96	1623300000	66		tr|N0DZM5|N0DZM5_9MICO Pantothenate synthetase OS=Tetrasphaera elongata Lp2 GN=panC PE=3 SV=1
	1.00732	0.157576	N0DYX6	29.7532	29.5065	29.7803	29.6631	29.4519	29.6722	29.4859	29.4629		323.31	5694900000	229		tr|N0DYX6|N0DYX6_9MICO Phenylalanine--tRNA ligase beta subunit OS=Tetrasphaera elongata Lp2 GN=pheT PE=3 SV=1
	0.877058	0.156956	N0E064	32.1071	31.9386	32.1426	32.0199	31.9503	32.0253	31.9356	31.6692		323.31	29389000000	360		tr|N0E064|N0E064_9MICO 30S ribosomal protein S13 OS=Tetrasphaera elongata Lp2 GN=rpsM PE=3 SV=1
	0.599048	0.156483	N0E267	33.6211	33.2837	33.4175	33.433	33.2567	33.5725	33.2009	33.0994		323.31	76649000000	479		tr|N0E267|N0E267_9MICO 30S ribosomal protein S10 OS=Tetrasphaera elongata Lp2 GN=rpsJ PE=3 SV=1
	1.02426	0.155682	N0E461	29.4578	29.3815	29.3795	29.3153	29.4015	29.1103	29.1045	29.2952		323.31	4703500000	152		tr|N0E461|N0E461_9MICO Fe(3+) ions import ATP-binding protein FbpC 2 OS=Tetrasphaera elongata Lp2 GN=fbpC PE=3 SV=1
	0.72579	0.155148	N0DYG7	28.6852	28.4947	28.5193	28.517	28.3694	28.6047	28.4671	28.1545		166.57	2579600000	70		tr|N0DYG7|N0DYG7_9MICO Aminotransferase ybdL OS=Tetrasphaera elongata Lp2 GN=ybdL PE=4 SV=1
	0.437207	0.153446	N0DZR7	26.6364	26.4609	26.5472	26.6446	26.3737	26.3007	26.1517	26.8491		42.039	697060000	17		tr|N0DZR7|N0DZR7_9MICO Uncharacterized protein OS=Tetrasphaera elongata Lp2 GN=BN10_520034 PE=4 SV=1
	0.963113	0.153314	N0E4X9	26.973	26.6962	26.8014	26.6216	26.5428	26.6234	26.6826	26.6302		30.921	743410000	19		tr|N0E4X9|N0E4X9_9MICO Uncharacterized protein OS=Tetrasphaera elongata Lp2 GN=BN10_750008 PE=4 SV=1
	0.785298	0.152545	N0DYA0	28.8218	28.6492	29.0242	28.6531	28.5745	28.5706	28.6709	28.7221		181.05	3177200000	75		tr|N0DYA0|N0DYA0_9MICO Uncharacterized protein OS=Tetrasphaera elongata Lp2 GN=BN10_1570003 PE=4 SV=1
	0.770983	0.152459	N0E563	28.8127	28.9782	28.9099	28.7266	28.7497	28.6838	28.4982	28.8859		204.65	3267800000	88		tr|N0E563|N0E563_9MICO Putative UDP-N-acetylglucosamine transferase OS=Tetrasphaera elongata Lp2 GN=BN10_810003 PE=4 SV=1
	0.640298	0.152023	N0E5B7	27.0132	26.9895	27.233	26.8275	26.9035	27.0533	26.8102	26.6881		104.39	915450000	43		tr|N0E5B7|N0E5B7_9MICO Uncharacterized protein OS=Tetrasphaera elongata Lp2 GN=BN10_570036 PE=4 SV=1
	0.412649	0.151813	N0E675	34.6223	34.2411	34.7367	34.4586	34.5764	34.4371	34.4264	34.0115		323.31	171080000000	521		tr|N0E675|N0E675_9MICO 50S ribosomal subunit protein L7/L12 OS=Tetrasphaera elongata Lp2 GN=rplL PE=4 SV=1
	0.94484	0.151757	N0E3Y4	30.1772	30.1487	30.2473	29.9375	30.0999	29.9775	29.8685	29.9578		323.31	7756500000	197		tr|N0E3Y4|N0E3Y4_9MICO Putative phenylalanine hydroxylase OS=Tetrasphaera elongata Lp2 GN=BN10_580040 PE=4 SV=1
	0.781348	0.150832	N0E3B8	31.6368	31.445	31.3268	31.4145	31.2676	31.185	31.2609	31.5064		323.31	19489000000	240		tr|N0E3B8|N0E3B8_9MICO Putative Acetoacetyl-CoA reductase (PhaB) OS=Tetrasphaera elongata Lp2 GN=BN10_530006 PE=3 SV=1
	0.0975639	0.150462	N0E4J8	25.1036	25.4459	25.2693	23.5623	24.9602	25.132	25.073	23.614		50.369	239300000	10		tr|N0E4J8|N0E4J8_9MICO Xanthine dehydrogenase OS=Tetrasphaera elongata Lp2 GN=BN10_460050 PE=4 SV=1
	0.405844	0.149593	N0E2F6	26.5686	26.5543	26.7519	26.4088	26.0124	26.5904	26.4128	26.6697		80.186	710010000	42		tr|N0E2F6|N0E2F6_9MICO Putative phosphoglycerate mutase (GpmB) OS=Tetrasphaera elongata Lp2 GN=BN10_470001 PE=4 SV=1
	1.05441	0.149048	N0E362	31.5672	31.4364	31.7026	31.5128	31.2805	31.4778	31.4792	31.3855		242.97	21357000000	194		tr|N0E362|N0E362_9MICO Uncharacterized protein OS=Tetrasphaera elongata Lp2 GN=BN10_890021 PE=4 SV=1
	0.787766	0.148129	N0E5A6	31.1059	31.1172	30.9263	30.959	30.9312	31.0797	30.7491	30.7558		323.31	14455000000	390		tr|N0E5A6|N0E5A6_9MICO Pyruvate, phosphate dikinase OS=Tetrasphaera elongata Lp2 GN=ppdK PE=4 SV=1
	0.805033	0.14763	N0DZB2	30.807	30.8032	30.9444	30.8986	30.7088	30.4807	30.8555	30.8177		323.31	13617000000	244		tr|N0DZB2|N0DZB2_9MICO Uncharacterized protein OS=Tetrasphaera elongata Lp2 GN=BN10_1130008 PE=4 SV=1
	1.04766	0.147572	N0E5L7	30.0648	29.8544	30.0084	29.8303	29.7658	29.8792	29.8453	29.6773		249.21	6960300000	159		tr|N0E5L7|N0E5L7_9MICO Mycothiol S-conjugate amidase OS=Tetrasphaera elongata Lp2 GN=mshB PE=3 SV=1
	0.981979	0.147178	N0E1R7	29.2292	29.0731	29.084	29.2187	28.83	29.0237	29.141	29.0217		323.31	3923800000	133		tr|N0E1R7|N0E1R7_9MICO ATP-dependent zinc metalloprotease FtsH OS=Tetrasphaera elongata Lp2 GN=ftsH PE=3 SV=1
	1.03605	0.147157	N0E5C6	29.9574	29.8292	30.073	29.9366	29.9463	29.6962	29.8144	29.7507		323.31	6991400000	181		tr|N0E5C6|N0E5C6_9MICO Serine--tRNA ligase OS=Tetrasphaera elongata Lp2 GN=serS PE=3 SV=1
	1.47719	0.146294	N0E1N7	29.2517	29.1315	29.322	29.3073	29.0456	29.1381	29.0656	29.1781		256.34	4325800000	134		tr|N0E1N7|N0E1N7_9MICO Ribonuclease J OS=Tetrasphaera elongata Lp2 GN=rnj PE=3 SV=1
	0.27905	0.146103	N0DZW5	25.2156	25.5289	24.7798	24.8121	24.6372	24.9631	24.9107	25.241		31.225	253540000	14		tr|N0DZW5|N0DZW5_9MICO Uncharacterized protein OS=Tetrasphaera elongata Lp2 GN=BN10_130020 PE=4 SV=1
	0.873542	0.144994	N0E325	29.644	29.4513	29.642	29.4565	29.5859	29.3069	29.3298	29.3913		323.31	5256700000	206		tr|N0E325|N0E325_9MICO Protein translocase subunit SecA OS=Tetrasphaera elongata Lp2 GN=secA PE=3 SV=1
	1.07973	0.144954	N0E4P6	26.9828	27.0967	27.0897	27.1819	26.8821	27.0381	26.8132	27.0378		132.06	959800000	32		tr|N0E4P6|N0E4P6_9MICO Phosphate starvation-induced protein OS=Tetrasphaera elongata Lp2 GN=phoH PE=4 SV=1
	0.858378	0.143596	N0DXU9	29.8821	29.6592	29.9201	29.7058	29.7732	29.5175	29.6864	29.6157		323.31	6343700000	177		tr|N0DXU9|N0DXU9_9MICO Transcription termination/antitermination protein NusA OS=Tetrasphaera elongata Lp2 GN=nusA PE=3 SV=1
	0.184665	0.143229	N0DZG3	24.4361	24.6092	24.2023	24.7726	24.6639	23.6976	24.1376	24.9481		23.012	143840000	5		tr|N0DZG3|N0DZG3_9MICO Ribonuclease P protein component OS=Tetrasphaera elongata Lp2 GN=rnpA PE=3 SV=1
	1.67472	0.14025	N0E0R3	31.8036	31.7312	31.741	31.7195	31.5052	31.706	31.6203	31.6026		323.31	24092000000	580		tr|N0E0R3|N0E0R3_9MICO Threonine--tRNA ligase OS=Tetrasphaera elongata Lp2 GN=thrS PE=3 SV=1
	0.731043	0.139482	N0DYR7	33.2013	33.1089	33.4356	33.2103	32.9896	33.2731	33.1032	33.0323		323.31	67032000000	652		tr|N0DYR7|N0DYR7_9MICO Pyrophosphate--fructose 6-phosphate 1-phosphotransferase OS=Tetrasphaera elongata Lp2 GN=pfp PE=3 SV=1
	1.01081	0.138737	N0E6A1	28.4688	28.492	28.5767	28.4655	28.2729	28.52	28.4188	28.2363		143.44	2566800000	68		tr|N0E6A1|N0E6A1_9MICO GDP-mannose 4,6-dehydratase OS=Tetrasphaera elongata Lp2 GN=gmd PE=3 SV=1
	0.735531	0.138475	N0E0S7	25.9342	26.0977	25.9582	25.7151	25.9189	25.7466	25.7877	25.6981		47.292	443260000	23		tr|N0E0S7|N0E0S7_9MICO Putative Acetylornithine transaminase OS=Tetrasphaera elongata Lp2 GN=BN10_1060011 PE=3 SV=1
	1.17225	0.137684	N0DZD0	30.7341	30.8485	30.8507	30.7534	30.5513	30.6915	30.5994	30.7937		323.31	12445000000	261		tr|N0DZD0|N0DZD0_9MICO ATP synthase subunit delta OS=Tetrasphaera elongata Lp2 GN=atpH PE=3 SV=1
	0.669213	0.137517	N0E283	31.3684	30.994	31.2757	31.1277	30.9645	31.0466	30.9942	31.2105		321.89	16940000000	215		tr|N0E283|N0E283_9MICO Uncharacterized protein OS=Tetrasphaera elongata Lp2 GN=BN10_450002 PE=4 SV=1
	0.575996	0.13716	N0E306	27.2628	27.1471	27.5913	27.1479	27.0891	27.2137	27.0788	27.2189		63.224	1175100000	51		tr|N0E306|N0E306_9MICO Glycosyl transferase family 2 OS=Tetrasphaera elongata Lp2 GN=BN10_520062 PE=4 SV=1
	0.570339	0.137002	N0E3F4	28.8679	28.5845	28.6222	28.7188	28.3381	28.4997	28.6344	28.7733		149.49	2834400000	82		tr|N0E3F4|N0E3F4_9MICO Putative phytanoyl-CoA dioxygenase OS=Tetrasphaera elongata Lp2 GN=BN10_560009 PE=4 SV=1
	0.330932	0.134172	N0E2K9	28.9507	28.8077	28.8743	28.341	28.471	28.5517	28.4948	28.9195		199.94	3070800000	95		tr|N0E2K9|N0E2K9_9MICO Oligoribonuclease OS=Tetrasphaera elongata Lp2 GN=orn PE=3 SV=1
	0.667324	0.133983	N0E4U8	27.5466	27.3026	27.3517	27.1412	27.2151	27.2675	27.0597	27.2638		83.189	1176300000	59		tr|N0E4U8|N0E4U8_9MICO Putative secreted protein OS=Tetrasphaera elongata Lp2 GN=BN10_520005 PE=4 SV=1
	0.703629	0.133502	N0E2J4	34.9039	34.8181	34.8044	34.8521	34.7	34.9669	34.6076	34.57		323.31	202210000000	1282		tr|N0E2J4|N0E2J4_9MICO Glyceraldehyde-3-phosphate dehydrogenase OS=Tetrasphaera elongata Lp2 GN=gapA PE=3 SV=1
	0.271221	0.133297	N0E5P3	25.6112	25.6147	25.3722	25.5363	24.9228	25.3212	25.4968	25.8603		27.623	296220000	17		tr|N0E5P3|N0E5P3_9MICO Uncharacterized protein OS=Tetrasphaera elongata Lp2 GN=BN10_610020 PE=4 SV=1
	0.868943	0.13309	N0E611	28.2703	28.1614	28.3028	28.0616	27.935	28.1399	28.1686	28.0203		151.22	2053400000	75		tr|N0E611|N0E611_9MICO Acyl-CoA dehydrogenase OS=Tetrasphaera elongata Lp2 GN=acdA PE=3 SV=1
	0.448888	0.132851	N0DY70	27.9727	27.9476	28.2692	28.0489	27.6702	28.1716	27.8286	28.0366		83.466	1864200000	81		tr|N0DY70|N0DY70_9MICO Cob(I)yrinic acid a,c-diamide adenosyltransferase OS=Tetrasphaera elongata Lp2 GN=BN10_1340002 PE=4 SV=1
	0.545185	0.132109	N0E3V6	26.1655	26.1064	26.2522	26.3983	26.3075	25.8936	26.0013	26.1917		71.61	542800000	29		tr|N0E3V6|N0E3V6_9MICO Uncharacterized protein OS=Tetrasphaera elongata Lp2 GN=BN10_590008 PE=4 SV=1
	0.38729	0.131019	N0DZ18	27.5042	27.6654	27.4367	27.8652	27.5627	27.2147	27.42	27.75		72.151	1404300000	38		tr|N0DZ18|N0DZ18_9MICO Peroxidase Tfu_3078 OS=Tetrasphaera elongata Lp2 GN=BN10_370002 PE=4 SV=1
	0.101881	0.130994	N0E009	26.6507	26.7372	25.8142	26.1807	24.965	26.7057	26.4679	26.7204		113.3	556000000	29		tr|N0E009|N0E009_9MICO Putative pyrophosphohydrolase OS=Tetrasphaera elongata Lp2 GN=BN10_540012 PE=4 SV=1
	0.630403	0.130959	N0DZT0	27.6413	27.2844	27.4049	27.3896	27.2293	27.4249	27.1542	27.3879		39.34	1151300000	42		tr|N0DZT0|N0DZT0_9MICO Uncharacterized protein OS=Tetrasphaera elongata Lp2 GN=BN10_500008 PE=4 SV=1
	0.294172	0.130777	N0E3X0	25.6417	25.3907	25.6701	25.2739	25.3486	25.1462	25.1414	25.817		20.092	275240000	9		tr|N0E3X0|N0E3X0_9MICO Anti-sigma factor antagonist OS=Tetrasphaera elongata Lp2 GN=rsbV PE=3 SV=1
	0.0976674	0.130731	N0E4M5	24.8796	24.6521	23.8753	24.6708	25.2095	23.1581	24.7062	24.4812		12.286	186630000	12		tr|N0E4M5|N0E4M5_9MICO Endoribonuclease YbeY OS=Tetrasphaera elongata Lp2 GN=ybeY PE=3 SV=1
	0.377518	0.130188	N0E1F3	29.4134	28.8573	29.365	29.1275	29.2973	28.9667	29.0039	28.9747		227.31	4386400000	93		tr|N0E1F3|N0E1F3_9MICO Ribonucleoside-diphosphate reductase subunit beta OS=Tetrasphaera elongata Lp2 GN=BN10_270006 PE=3 SV=1
	1.42121	0.129697	N0DZV9	31.5712	31.449	31.4844	31.5287	31.331	31.5011	31.3505	31.332		323.31	19834000000	458		tr|N0DZV9|N0DZV9_9MICO Putative carboxytransferase (Putative Propionyl-CoA carboxylase beta chain (PccB) or putative methylmalonyl caboxyltransferase) OS=Tetrasphaera elongata Lp2 GN=BN10_520079 PE=4 SV=1
	0.211795	0.129228	N0E1Q0	25.6081	25.4707	25.6786	25.5632	24.7792	25.7308	25.4469	25.8468		38.271	351710000	14		tr|N0E1Q0|N0E1Q0_9MICO Uracil-DNA glycosylase OS=Tetrasphaera elongata Lp2 GN=ung PE=3 SV=1
	0.273541	0.128304	N0E3W4	26.8909	26.3168	26.3164	26.6183	26	26.5489	26.5209	26.5595		54.23	654730000	22		tr|N0E3W4|N0E3W4_9MICO Uncharacterized protein OS=Tetrasphaera elongata Lp2 GN=BN10_580005 PE=4 SV=1
	0.530697	0.127977	N0E5D5	28.3573	28.6054	28.3182	28.491	28.4663	28.0722	28.2848	28.4365		163.96	2504400000	100		tr|N0E5D5|N0E5D5_9MICO Tryptophan synthase beta chain OS=Tetrasphaera elongata Lp2 GN=trpB PE=3 SV=1
	0.310958	0.127295	N0E0X2	26.578	26.9076	26.8993	27.125	27.0474	26.4114	26.7456	26.7964		121.89	808390000	34		tr|N0E0X2|N0E0X2_9MICO Protein translocase subunit SecD OS=Tetrasphaera elongata Lp2 GN=secD PE=3 SV=1
	0.71324	0.126112	N0E5L4	30.2273	30.4265	30.2969	30.4772	30.0746	30.1778	30.345	30.3261		323.31	9350700000	221		tr|N0E5L4|N0E5L4_9MICO Long-chain specific acyl-CoA dehydrogenase,mitochondrial OS=Tetrasphaera elongata Lp2 GN=ACADL PE=3 SV=1
	0.281838	0.125925	N0DYY9	25.6793	25.6327	25.6265	25.5508	25.9847	25.289	25.5603	25.1515		88.498	356280000	38		tr|N0DYY9|N0DYY9_9MICO Glycerol-3-phosphate dehydrogenase OS=Tetrasphaera elongata Lp2 GN=glpD PE=3 SV=1
	0.600473	0.125879	N0E482	29.0938	29.0814	29.0405	28.9057	28.7106	29.0334	28.797	29.0769		205.82	3571600000	109		tr|N0E482|N0E482_9MICO Type I site-specific deoxyribonuclease OS=Tetrasphaera elongata Lp2 GN=hsdM PE=4 SV=1
	0.587579	0.125184	N0E391	27.5858	27.2839	27.3125	27.4238	27.2778	27.223	27.4759	27.1286		136.6	1248500000	55		tr|N0E391|N0E391_9MICO ATP-dependent DNA helicase OS=Tetrasphaera elongata Lp2 GN=BN10_530032 PE=4 SV=1
	0.229622	0.125127	N0E3N6	26.1268	25.8157	26.0074	26.0083	26.4844	25.71	25.5546	25.7087		47.247	546160000	36		tr|N0E3N6|N0E3N6_9MICO Prevent-host-death family protein OS=Tetrasphaera elongata Lp2 GN=BN10_560013 PE=4 SV=1
	0.319427	0.124559	N0E1C2	25.9032	25.8929	25.5939	25.4181	25.5474	25.8731	25.5762	25.3133		19.433	353320000	17		tr|N0E1C2|N0E1C2_9MICO Phosphoribosylglycinamide formyltransferase OS=Tetrasphaera elongata Lp2 GN=purN PE=3 SV=1
	0.795776	0.124269	N0E1H2	28.1783	28.3116	28.1491	28.2485	28.0581	28.2765	28.1081	27.9477		74.692	2058800000	47		tr|N0E1H2|N0E1H2_9MICO Delta-aminolevulinic acid dehydratase (Porphobilinogen synthase) OS=Tetrasphaera elongata Lp2 GN=hemB PE=3 SV=1
	0.391162	0.124268	N0E1D1	27.9179	27.9413	28.0498	28.1444	27.7446	28.2514	27.6712	27.8893		124.09	1807000000	69		tr|N0E1D1|N0E1D1_9MICO Atrazine chlorohydrolase OS=Tetrasphaera elongata Lp2 GN=BN10_230039 PE=4 SV=1
	0.25179	0.123494	N0E4F2	25.6592	25.2962	26.1347	25.8281	25.5812	25.8895	25.4827	25.4708		40.268	523710000	17		tr|N0E4F2|N0E4F2_9MICO Putative Acetyl-coenzyme A carboxylase carboxyl transferase subunits beta/alpha OS=Tetrasphaera elongata Lp2 GN=BN10_430005 PE=4 SV=1
	0.855743	0.122914	N0DXI2	33.693	33.5421	33.7034	33.5501	33.4063	33.662	33.4353	33.4933		323.31	89369000000	904		tr|N0DXI2|N0DXI2_9MICO ATP synthase subunit beta OS=Tetrasphaera elongata Lp2 GN=atpD PE=3 SV=1
	0.650941	0.122579	N0E3X9	28.8876	29.0348	29.0151	29.0111	28.9114	28.7181	28.7475	29.0812		256.27	3655600000	93		tr|N0E3X9|N0E3X9_9MICO 2-amino-3-ketobutyrate coenzyme A ligase OS=Tetrasphaera elongata Lp2 GN=kbl PE=3 SV=1
	0.235973	0.121402	N0E1Y8	29.0888	28.3683	29.0129	28.6546	28.5126	28.3873	28.8886	28.8505		75.895	3347200000	50		tr|N0E1Y8|N0E1Y8_9MICO tRNA(Ile)-lysidine synthase OS=Tetrasphaera elongata Lp2 GN=tilS PE=3 SV=1
	0.31298	0.120635	N0E3D6	26.7398	26.881	27.0753	26.6902	26.7335	26.3675	27.0397	26.7631		97.146	864430000	38		tr|N0E3D6|N0E3D6_9MICO Putative oxidoreductase OS=Tetrasphaera elongata Lp2 GN=BN10_540065 PE=4 SV=1
	0.203359	0.120149	N0DZZ8	25.4489	25.2776	25.8703	25.1903	25.1707	24.9731	25.8102	25.3525		36.258	298200000	15		tr|N0DZZ8|N0DZZ8_9MICO Uncharacterized protein OS=Tetrasphaera elongata Lp2 GN=BN10_520053 PE=4 SV=1
	0.227799	0.119134	N0E483	26.8681	26.3319	27.1545	26.3794	26.4014	26.5029	26.7205	26.6324		43.43	811460000	24		tr|N0E483|N0E483_9MICO Ferroxidase OS=Tetrasphaera elongata Lp2 GN=bfr PE=3 SV=1
	0.884297	0.118618	N0E2F3	29.9967	29.9669	30.122	29.9877	29.92	30.0557	29.8102	29.813		323.31	7600700000	143		tr|N0E2F3|N0E2F3_9MICO NADH-quinone oxidoreductase subunit G OS=Tetrasphaera elongata Lp2 GN=BN10_460001 PE=4 SV=1
	0.4488	0.118186	N0DZN5	25.5071	25.3848	25.0792	25.2724	25.0886	25.146	25.1197	25.4165		24.734	269740000	16		tr|N0DZN5|N0DZN5_9MICO Cell-division ABC transporter (ATP-binding protein) (Modular protein) OS=Tetrasphaera elongata Lp2 GN=BN10_1230004 PE=3 SV=1
	0.609596	0.117198	N0DZM4	27.2139	27.3317	27.4188	27.2083	27.2105	27.0944	27.0265	27.3726		83.625	1128600000	34		tr|N0DZM4|N0DZM4_9MICO Putative aldehyde dehydrogenase OS=Tetrasphaera elongata Lp2 GN=BN10_1190007 PE=4 SV=1
	0.308952	0.117186	N0E4K5	27.8332	27.5528	27.6061	27.6736	27.6613	27.8967	27.212	27.427		113.85	1518500000	57		tr|N0E4K5|N0E4K5_9MICO Vi polysaccharide biosynthesis protein vipA/tviB OS=Tetrasphaera elongata Lp2 GN=vipA PE=3 SV=1
	0.249022	0.116838	N0DZS3	27.4644	27.0888	27.7058	27.3809	27.3764	27.2489	27.6162	26.9311		80.471	1290400000	44		tr|N0DZS3|N0DZS3_9MICO Aspartate 1-decarboxylase OS=Tetrasphaera elongata Lp2 GN=panD PE=3 SV=1
	1.38097	0.116141	N0E2C2	32.4053	32.5366	32.4565	32.5377	32.355	32.4551	32.3546	32.3069		323.31	39442000000	650		tr|N0E2C2|N0E2C2_9MICO 50S ribosomal protein L14 OS=Tetrasphaera elongata Lp2 GN=rplNA PE=3 SV=1
	0.628404	0.116001	N0E2Q4	33.2954	33.1353	33.1655	33.1394	33.0896	33.2591	33.0508	32.872		323.31	65252000000	774		tr|N0E2Q4|N0E2Q4_9MICO 50S ribosomal protein L1 OS=Tetrasphaera elongata Lp2 GN=rplA PE=3 SV=1
	1.21015	0.115901	N0E194	30.4391	30.3069	30.3774	30.2816	30.287	30.1486	30.301	30.2049		323.31	9080100000	202		tr|N0E194|N0E194_9MICO Putative dTDP-4-dehydrorhamnose reductase OS=Tetrasphaera elongata Lp2 GN=spsK PE=4 SV=1
	0.419375	0.115092	N0E1P3	27.4109	27.4805	27.3041	27.1219	27.3882	26.9495	27.2625	27.2568		84.772	1190600000	47		tr|N0E1P3|N0E1P3_9MICO Ribosomal protein S12 methylthiotransferase RimO OS=Tetrasphaera elongata Lp2 GN=rimO PE=3 SV=1
	0.917953	0.114389	N0DZ28	28.2803	28.1911	28.3539	28.3709	28.1849	28.0484	28.2609	28.2444		201.19	2310100000	82		tr|N0DZ28|N0DZ28_9MICO Citrate lyase beta chain OS=Tetrasphaera elongata Lp2 GN=BN10_1070035 PE=4 SV=1
	0.579576	0.112366	N0DZU9	31.2669	31.4409	31.2445	31.4592	31.3102	31.1364	31.1077	31.4076		323.31	18455000000	292		tr|N0DZU9|N0DZU9_9MICO Uncharacterized protein OS=Tetrasphaera elongata Lp2 GN=BN10_1240014 PE=4 SV=1
	0.427332	0.111745	N0E4Z3	32.5172	32.421	32.5609	32.4661	32.0477	32.5288	32.4373	32.5043		323.31	40787000000	496		tr|N0E4Z3|N0E4Z3_9MICO 50S ribosomal protein L5 OS=Tetrasphaera elongata Lp2 GN=rplE PE=3 SV=1
	0.094089	0.111465	N0E517	25.3927	25.2618	25.217	25.3496	25.8507	23.9722	25.21	25.7423		25.492	294740000	14		tr|N0E517|N0E517_9MICO Uncharacterized protein OS=Tetrasphaera elongata Lp2 GN=BN10_780018 PE=4 SV=1
	0.168491	0.111189	N0E5M0	27.4333	27.007	27.4934	26.9384	27.7306	27.0092	26.8303	26.8573		60.852	1213300000	44		tr|N0E5M0|N0E5M0_9MICO Secreted protein OS=Tetrasphaera elongata Lp2 GN=BN10_920056 PE=4 SV=1
	0.439226	0.110816	N0E3H6	27.4173	27.2782	27.3577	27.2993	27.5082	27.1722	27.2438	26.9851		101.57	1294700000	68		tr|N0E3H6|N0E3H6_9MICO D-lysine 5,6-aminomutase beta subunit OS=Tetrasphaera elongata Lp2 GN=BN10_560034 PE=4 SV=1
	0.91878	0.110785	N0E697	33.6937	33.7482	33.6637	33.7884	33.6032	33.77	33.5352	33.5425		323.31	94192000000	994		tr|N0E697|N0E697_9MICO Phosphoglycerate kinase OS=Tetrasphaera elongata Lp2 GN=pgk PE=3 SV=1
	0.603343	0.109872	N0E206	32.7799	32.4436	32.6755	32.4687	32.4752	32.5579	32.4218	32.4733		323.31	38614000000	357		tr|N0E206|N0E206_9MICO Cell division protein FtsZ OS=Tetrasphaera elongata Lp2 GN=ftsZ PE=3 SV=1
	0.25404	0.10818	N0DYU6	27.3975	27.1435	27.6055	27.0943	27.2257	27.3813	27.366	26.835		49.309	1154100000	40		tr|N0DYU6|N0DYU6_9MICO Argininosuccinate lyase OS=Tetrasphaera elongata Lp2 GN=argH PE=3 SV=1
	0.669503	0.107404	N0DZ67	29.1282	29.3571	29.1565	29.2468	29.1576	29.2069	28.9465	29.148		278.67	5055300000	125		tr|N0DZ67|N0DZ67_9MICO Ubiquinol-cytochrome c reductase iron-sulfur subunit OS=Tetrasphaera elongata Lp2 GN=qcrA PE=4 SV=1
	0.617706	0.107344	N0E210	33.6384	33.5089	33.7555	33.5709	33.5115	33.3386	33.6403	33.554		323.31	86786000000	944		tr|N0E210|N0E210_9MICO Wag31 OS=Tetrasphaera elongata Lp2 GN=BN10_300061 PE=4 SV=1
	0.231571	0.107243	N0E2W6	26.1033	26.0848	25.8839	25.4116	25.6452	25.8796	25.5645	25.9652		39.695	404620000	17		tr|N0E2W6|N0E2W6_9MICO Putative hydrolase OS=Tetrasphaera elongata Lp2 GN=BN10_500011 PE=4 SV=1
	0.350299	0.106254	N0E2U2	28.1384	27.772	27.9513	27.7197	27.8514	27.7191	27.5843	28.0015		171.2	1697400000	63		tr|N0E2U2|N0E2U2_9MICO Putative hydrolase OS=Tetrasphaera elongata Lp2 GN=BN10_50007 PE=4 SV=1
	0.65157	0.105599	N0E1D8	28.5275	28.5031	28.7008	28.5925	28.5548	28.5629	28.4947	28.2891		226.99	2931100000	106		tr|N0E1D8|N0E1D8_9MICO Putative folylpolyglutamate synthase OS=Tetrasphaera elongata Lp2 GN=BN10_670003 PE=4 SV=1
	0.409979	0.104338	N0E2U1	29.2665	29.0114	29.0713	28.9149	28.7377	29.1475	28.9879	28.9736		255.69	3641000000	115		tr|N0E2U1|N0E2U1_9MICO Putative transcriptional regulatory protein pdtaR OS=Tetrasphaera elongata Lp2 GN=pdtaR PE=4 SV=1
	0.346096	0.102852	N0E0E4	28.6237	28.4836	28.6026	28.429	28.4341	28.7425	28.3835	28.1673		312.05	2690500000	146		tr|N0E0E4|N0E0E4_9MICO DNA topoisomerase 1 OS=Tetrasphaera elongata Lp2 GN=topA PE=3 SV=1
	0.363301	0.102811	N0E2W2	29.4257	29.1423	29.6515	29.3204	29.2175	29.4633	29.2107	29.2373		284.37	4750300000	150		tr|N0E2W2|N0E2W2_9MICO Putative asparaginase OS=Tetrasphaera elongata Lp2 GN=BN10_890017 PE=4 SV=1
	0.676796	0.102266	N0E1X8	28.1695	28.1801	28.1142	28.2885	28.2732	28.0082	28.0115	28.0505		132.22	2066700000	48		tr|N0E1X8|N0E1X8_9MICO Probable nicotinate-nucleotide adenylyltransferase OS=Tetrasphaera elongata Lp2 GN=nadD PE=3 SV=1
	0.608606	0.102077	N0E256	28.7077	28.7485	28.5486	28.5684	28.3689	28.575	28.6631	28.558		119.27	2806300000	91		tr|N0E256|N0E256_9MICO Putative glutamine synthetase 2 OS=Tetrasphaera elongata Lp2 GN=glnA PE=3 SV=1
	0.434937	0.101502	N0E6B6	27.9671	27.5719	27.902	27.7087	27.5545	27.762	27.6526	27.7746		71.488	1517000000	61		tr|N0E6B6|N0E6B6_9MICO Imidazole glycerol phosphate synthase subunit HisF OS=Tetrasphaera elongata Lp2 GN=hisF PE=3 SV=1
	0.0764676	0.101488	N0E4N3	25.099	26.0437	25.0939	25.8841	25.9762	25.6814	25.829	24.2282		39.751	407110000	16		tr|N0E4N3|N0E4N3_9MICO Putative ATP-dependent helicase dinG homolog OS=Tetrasphaera elongata Lp2 GN=dinG PE=4 SV=1
	0.674259	0.100588	N0E5T6	26.5945	26.7038	26.6269	26.8045	26.741	26.4993	26.5223	26.5647		53.922	786800000	38		tr|N0E5T6|N0E5T6_9MICO Uncharacterized protein OS=Tetrasphaera elongata Lp2 GN=BN10_990016 PE=4 SV=1
	0.214665	0.0993152	N0DXC8	27.2548	26.7103	26.8061	26.9955	26.9972	27.1495	26.5364	26.6863		38.756	878970000	37		tr|N0DXC8|N0DXC8_9MICO Cobalt transport protein CbiM OS=Tetrasphaera elongata Lp2 GN=cbiM PE=3 SV=1
	0.187901	0.0980291	N0DY76	27.4429	27.3485	27.4832	27.2831	27.8615	27.2684	26.9828	27.0529		65.958	1216200000	43		tr|N0DY76|N0DY76_9MICO Acetolactate synthase OS=Tetrasphaera elongata Lp2 GN=ilvB PE=3 SV=1
	0.245311	0.0979071	N0E0B0	27.8951	27.4369	27.636	27.2563	27.6394	27.2842	27.572	27.3371		112.25	1395800000	41		tr|N0E0B0|N0E0B0_9MICO Putative regulatory protein OS=Tetrasphaera elongata Lp2 GN=BN10_540076 PE=4 SV=1
	0.376752	0.0973387	N0DYA2	25.4368	25.3385	25.4822	25.432	25.483	25.4008	25.4118	25.0047		34.813	305290000	17		tr|N0DYA2|N0DYA2_9MICO Putative methyltransferase OS=Tetrasphaera elongata Lp2 GN=BN10_1590005 PE=4 SV=1
	0.446721	0.0969286	N0E2S2	29.8592	29.6233	29.9557	29.593	29.5777	29.7412	29.7146	29.6101		323.31	6142700000	175		tr|N0E2S2|N0E2S2_9MICO Alanine--tRNA ligase OS=Tetrasphaera elongata Lp2 GN=alaS PE=3 SV=1
	0.228034	0.0964494	N0E3Q9	28.2789	28.0596	28.6045	28.0243	28.0042	28.3988	28.2372	27.9413		144.06	2181600000	61		tr|N0E3Q9|N0E3Q9_9MICO Putative methyltransferase OS=Tetrasphaera elongata Lp2 GN=BN10_990002 PE=4 SV=1
	0.654934	0.0963154	N0E1Z5	31.1203	31.0748	31.3716	31.1442	31.0567	31.1366	31.0272	31.1052		323.31	16351000000	267		tr|N0E1Z5|N0E1Z5_9MICO DNA polymerase III subunit beta OS=Tetrasphaera elongata Lp2 GN=dnaN PE=4 SV=1
	0.776372	0.095737	N0E0L0	28.0961	28.1432	28.3011	28.0629	28.0554	27.9785	28.1282	28.0582		54.826	1703500000	31		tr|N0E0L0|N0E0L0_9MICO Aspartyl/glutamyl-tRNA(Asn/Gln) amidotransferase subunit C OS=Tetrasphaera elongata Lp2 GN=gatC PE=3 SV=1
	0.835483	0.0952978	N0E4Y8	33.958	33.8276	33.7797	33.7267	33.7863	33.6636	33.7632	33.6977		323.31	100000000000	572		tr|N0E4Y8|N0E4Y8_9MICO 50S ribosomal protein L24 OS=Tetrasphaera elongata Lp2 GN=rplX PE=3 SV=1
	0.260646	0.0952864	N0E5P2	29.6754	29.4186	29.8301	29.6074	29.2876	29.8245	29.3827	29.6556		213.21	5777500000	112		tr|N0E5P2|N0E5P2_9MICO ATP-dependent Clp protease proteolytic subunit OS=Tetrasphaera elongata Lp2 GN=clpP PE=3 SV=1
	0.244244	0.0948105	N0E065	27.2961	27.3056	26.6935	27.3225	27.0262	27.1265	26.9761	27.1096		41.348	988660000	26		tr|N0E065|N0E065_9MICO Uncharacterized protein OS=Tetrasphaera elongata Lp2 GN=BN10_1320020 PE=4 SV=1
	0.367227	0.0946312	N0E0A5	27.1762	27.1692	27.1005	27.1369	26.9159	27.3564	26.8657	27.0662		78.873	1106700000	44		tr|N0E0A5|N0E0A5_9MICO Formyltetrahydrofolate deformylase OS=Tetrasphaera elongata Lp2 GN=purU PE=3 SV=1
	0.285839	0.0943236	N0DXH7	28.3336	27.882	28.4687	28.0784	28.1595	28.1543	28.0905	27.9811		155.64	2056100000	87		tr|N0DXH7|N0DXH7_9MICO Putative magnesium or manganese-dependent protein phosphatase OS=Tetrasphaera elongata Lp2 GN=BN10_1130010 PE=4 SV=1
	0.203351	0.0933414	N0E3H7	28.3009	27.7771	28.4656	28.0625	27.9719	27.8088	28.2558	28.1962		118.59	2169600000	59		tr|N0E3H7|N0E3H7_9MICO N utilization substance protein B homolog OS=Tetrasphaera elongata Lp2 GN=nusB PE=3 SV=1
	0.231226	0.0927563	N0E530	29.439	28.9301	29.5419	29.1478	29.418	29.0829	29.1065	29.0804		251.9	4658000000	126		tr|N0E530|N0E530_9MICO Orotate phosphoribosyltransferase OS=Tetrasphaera elongata Lp2 GN=pyrE PE=3 SV=1
	1.01157	0.0926094	N0E2B7	29.956	30.0705	30.0307	29.8655	29.8547	29.9017	29.9178	29.8779		323.31	7064800000	211		tr|N0E2B7|N0E2B7_9MICO 50S ribosomal protein L6 OS=Tetrasphaera elongata Lp2 GN=rplF PE=3 SV=1
	0.480806	0.092576	N0E1U6	27.8668	27.9121	28.0666	28.059	27.901	28.076	27.7533	27.8039		121.29	1829700000	54		tr|N0E1U6|N0E1U6_9MICO 1-aminocyclopropane-1-carboxylate deaminase OS=Tetrasphaera elongata Lp2 GN=acdS PE=4 SV=1
	0.10041	0.0920143	N0E1A6	25.1801	25.3923	24.5297	25.2488	24.1665	25.28	25.2375	25.2989		15.078	254320000	6		tr|N0E1A6|N0E1A6_9MICO Putative ligase OS=Tetrasphaera elongata Lp2 GN=BN10_630006 PE=4 SV=1
	0.189081	0.0913911	N0E0E0	29.252	29.5824	28.7623	29.3776	29.2679	29.2945	29.0384	29.008		198.07	4202400000	131		tr|N0E0E0|N0E0E0_9MICO Putative dehydrogenase OS=Tetrasphaera elongata Lp2 GN=BN10_560040 PE=4 SV=1
	0.398235	0.0884695	N0DZA9	27.2393	26.8207	26.9946	27.0906	26.9198	27.0505	26.9732	26.8478		42.922	878640000	27		tr|N0DZA9|N0DZA9_9MICO Uncharacterized protein OS=Tetrasphaera elongata Lp2 GN=BN10_470013 PE=4 SV=1
	0.444846	0.0877953	N0E0A4	28.3584	28.2133	28.3937	28.2665	28.0395	28.4168	28.2423	28.1821		138.78	2276600000	81		tr|N0E0A4|N0E0A4_9MICO Uncharacterized protein OS=Tetrasphaera elongata Lp2 GN=BN10_560081 PE=4 SV=1
	0.523299	0.087585	N0E193	30.4411	30.2279	30.1506	30.2466	30.1897	30.2683	30.0496	30.2083		297.66	8320400000	128		tr|N0E193|N0E193_9MICO Iron-dependent repressor IdeR OS=Tetrasphaera elongata Lp2 GN=ideR PE=4 SV=1
	0.355912	0.0872273	N0E006	31.0758	31.2253	30.9686	31.2472	30.9128	31.266	30.921	31.0682		323.31	16122000000	530		tr|N0E006|N0E006_9MICO Uncharacterized protein OS=Tetrasphaera elongata Lp2 GN=BN10_540007 PE=4 SV=1
	0.253972	0.0871634	N0E1M3	27.4768	27.1337	26.9163	27.2713	27.1455	27.3106	26.9621	27.0312		89.752	1075000000	44		tr|N0E1M3|N0E1M3_9MICO 2,4-dienoyl-CoA reductase, NADH and FMN-linked OS=Tetrasphaera elongata Lp2 GN=fadH PE=4 SV=1
	0.342717	0.0857549	N0E142	26.3748	26.5485	26.6535	26.4307	26.6301	26.2164	26.4627	26.3554		78.618	649140000	28		tr|N0E142|N0E142_9MICO Putative inositol monophosphatase OS=Tetrasphaera elongata Lp2 GN=BN10_1730013 PE=4 SV=1
	0.523223	0.0853982	N0E1N6	28.9566	28.7133	28.9855	28.7455	28.8028	28.8134	28.6986	28.7445		176.72	3461900000	120		tr|N0E1N6|N0E1N6_9MICO Uncharacterized protein OS=Tetrasphaera elongata Lp2 GN=BN10_290008 PE=4 SV=1
	0.243055	0.0852046	N0E3W6	26.6403	26.2427	26.6502	26.409	26.6342	26.1733	26.4996	26.2943		33.333	673270000	17		tr|N0E3W6|N0E3W6_9MICO Putative Transcriptional regulator, TetR family OS=Tetrasphaera elongata Lp2 GN=BN10_230027 PE=4 SV=1
	0.0569515	0.0850344	N0E383	24.1566	24.5158	24.6804	24.9695	23.3983	25.7877	24.1807	24.6154		26.35	179920000	10		tr|N0E383|N0E383_9MICO Deoxyguanosinetriphosphate triphosphohydrolase-like protein OS=Tetrasphaera elongata Lp2 GN=dgt PE=4 SV=1
	0.245465	0.0849252	N0E0I4	24.2571	24.1153	24.361	24.1181	24.1418	24.457	24.0747	23.8383		11.494	130270000	9		tr|N0E0I4|N0E0I4_9MICO Uncharacterized protein OS=Tetrasphaera elongata Lp2 GN=BN10_590005 PE=4 SV=1
	0.259884	0.0847726	N0E0J0	26.5111	26.3422	26.4118	26.0988	26.1429	26.5582	26.1749	26.1487		62.706	619740000	32		tr|N0E0J0|N0E0J0_9MICO Uncharacterized protein OS=Tetrasphaera elongata Lp2 GN=BN10_570019 PE=4 SV=1
	0.431799	0.0846386	N0DXY3	33.7855	33.6945	33.7309	33.7514	33.5878	33.8995	33.6309	33.5056		323.31	101300000000	1241		tr|N0DXY3|N0DXY3_9MICO 30S ribosomal protein S4 OS=Tetrasphaera elongata Lp2 GN=rpsD PE=3 SV=1
	0.156168	0.0832047	N0E243	28.0345	27.6822	27.0989	27.4982	27.6144	27.5846	27.361	27.421		37.904	1301200000	45		tr|N0E243|N0E243_9MICO Chorismate mutase OS=Tetrasphaera elongata Lp2 GN=BN10_40002 PE=4 SV=1
	0.25945	0.0830564	N0E2K4	31.9547	31.7595	32.1976	31.7726	31.7383	32.0574	31.8671	31.6893		323.31	27841000000	373		tr|N0E2K4|N0E2K4_9MICO 30S ribosomal protein S6 OS=Tetrasphaera elongata Lp2 GN=rpsF PE=3 SV=1
	0.137058	0.0828109	N0E2N0	25.5592	26.0923	25.6739	26.4001	25.9146	25.5072	25.8942	26.0782		23.758	458050000	19		tr|N0E2N0|N0E2N0_9MICO Putative acetyl-CoA C-acyltransferase (Beta-ketothiolase) or Acetoacetyl-CoA thiolase OS=Tetrasphaera elongata Lp2 GN=BN10_810005 PE=3 SV=1
	0.531218	0.0826139	N0DZB6	29.866	29.7535	29.5909	29.7345	29.6643	29.7195	29.5248	29.7059		323.31	6186100000	199		tr|N0DZB6|N0DZB6_9MICO Cysteine--tRNA ligase OS=Tetrasphaera elongata Lp2 GN=cysS PE=3 SV=1
	0.16925	0.0814338	N0E0V7	27.8388	27.6012	28.0101	27.6854	28.0985	27.4911	27.8343	27.386		132.34	1612100000	45		tr|N0E0V7|N0E0V7_9MICO Cytidylate kinase OS=Tetrasphaera elongata Lp2 GN=cmk PE=3 SV=1
	0.34051	0.0806627	N0E035	28.6322	28.9254	28.5495	28.7535	28.8051	28.5815	28.5283	28.6231		105.12	2909300000	82		tr|N0E035|N0E035_9MICO 4-hydroxy-3-methylbut-2-enyl diphosphate reductase OS=Tetrasphaera elongata Lp2 GN=ispH PE=3 SV=1
	0.40538	0.0792675	N0DZP4	26.1608	25.8937	25.8648	25.9369	25.9589	25.7578	25.9882	25.8343		42.757	433660000	19		tr|N0DZP4|N0DZP4_9MICO Diacylglycerol O-acyltransferase OS=Tetrasphaera elongata Lp2 GN=BN10_520014 PE=3 SV=1
	0.197469	0.0789766	N0E2Q6	28.5455	28.1951	28.7335	28.0618	28.3636	28.2247	28.3392	28.2924		236.46	2139500000	64		tr|N0E2Q6|N0E2Q6_9MICO Adenosine deaminase OS=Tetrasphaera elongata Lp2 GN=BN10_840007 PE=4 SV=1
	0.894596	0.0788679	N0E2E4	33.6317	33.4847	33.6094	33.4815	33.5195	33.4344	33.446	33.4919		323.31	86231000000	1357		tr|N0E2E4|N0E2E4_9MICO Elongation factor G OS=Tetrasphaera elongata Lp2 GN=fusA PE=3 SV=1
	0.395712	0.0788169	N0E250	32.2543	31.9723	32.059	31.9058	31.8641	32.0688	32.004	31.9391		323.31	30705000000	388		tr|N0E250|N0E250_9MICO 30S ribosomal protein S8 OS=Tetrasphaera elongata Lp2 GN=rpsH PE=3 SV=1
	0.341733	0.0787978	N0DXM8	29.9571	29.8711	29.8446	29.8865	29.7924	29.5475	29.9368	29.9675		142.54	6723400000	119		tr|N0DXM8|N0DXM8_9MICO Putative ATP-binding protein OS=Tetrasphaera elongata Lp2 GN=BN10_1070007 PE=4 SV=1
	0.498038	0.0787978	N0E0W4	28.408	28.4501	28.2079	28.4832	28.3323	28.3596	28.3452	28.197		66.543	2274700000	93		tr|N0E0W4|N0E0W4_9MICO Uncharacterized protein OS=Tetrasphaera elongata Lp2 GN=BN10_590044 PE=4 SV=1
	1.70692	0.0786219	N0DZH1	33.8891	33.8794	33.8638	33.9107	33.8558	33.7889	33.7525	33.8314		323.31	107080000000	1294		tr|N0DZH1|N0DZH1_9MICO ATP synthase subunit alpha OS=Tetrasphaera elongata Lp2 GN=atpA PE=3 SV=1
	0.334363	0.0777702	N0DYH3	29.7816	29.3848	29.731	29.4586	29.4746	29.5331	29.5065	29.5307		323.31	5700200000	158		tr|N0DYH3|N0DYH3_9MICO Putative mannose-6-phosphate isomerase OS=Tetrasphaera elongata Lp2 GN=BN10_1730030 PE=3 SV=1
	0.152384	0.077467	N0E2P7	25.7514	26.603	26.3217	25.9903	26.2064	26.119	25.9446	26.0865		69.011	516350000	23		tr|N0E2P7|N0E2P7_9MICO UDP-glucose 4-epimerase OS=Tetrasphaera elongata Lp2 GN=galE PE=3 SV=1
	0.18664	0.0773449	N0E364	25.8169	26.2496	25.846	26.008	25.6881	25.9123	25.7493	26.2614		46.148	444510000	25		tr|N0E364|N0E364_9MICO Inositol monophosphatase family protein OS=Tetrasphaera elongata Lp2 GN=BN10_520051 PE=4 SV=1
	0.714903	0.0773201	N0E279	34.0851	34.1572	34.0543	34.1516	34.0948	34.131	33.9396	33.9735		323.31	124980000000	1014		tr|N0E279|N0E279_9MICO 30S ribosomal protein S7 OS=Tetrasphaera elongata Lp2 GN=rpsG PE=3 SV=1
	0.439479	0.0766854	N0DZL3	27.3788	27.5393	27.559	27.4493	27.4969	27.2225	27.5061	27.3942		159.85	1279500000	60		tr|N0DZL3|N0DZL3_9MICO Uncharacterized protein OS=Tetrasphaera elongata Lp2 GN=BN10_1210002 PE=4 SV=1
	0.658443	0.0750418	N0DYD5	29.9973	29.9575	30.032	29.8959	29.8647	30.0284	29.8134	29.876		323.31	7272900000	176		tr|N0DYD5|N0DYD5_9MICO N-acylglucosamine 2-epimerase OS=Tetrasphaera elongata Lp2 GN=BN10_1650001 PE=4 SV=1
	0.569205	0.0750151	N0DZB8	27.9592	28.1138	28.1018	28.0798	28.1118	27.8653	27.9967	27.9807		230.58	1995100000	96		tr|N0DZB8|N0DZB8_9MICO Uncharacterized protein OS=Tetrasphaera elongata Lp2 GN=BN10_470023 PE=4 SV=1
	0.171204	0.0749168	N0DZ05	28.0271	27.7412	28.3984	27.8383	27.9942	28.0956	27.9329	27.6826		89.878	1952600000	65		tr|N0DZ05|N0DZ05_9MICO Putative transcriptional regulator OS=Tetrasphaera elongata Lp2 GN=BN10_360025 PE=4 SV=1
	0.23365	0.073421	N0DYV7	26.0912	25.6958	25.914	26.1652	25.8942	25.6901	25.9779	26.0103		39.225	440170000	19		tr|N0DYV7|N0DYV7_9MICO UDP-N-acetylmuramate--L-alanine ligase OS=Tetrasphaera elongata Lp2 GN=murC PE=3 SV=1
	0.119761	0.0720911	N0E0B6	26.0876	26.4759	26.2168	26.2203	26.392	25.5875	26.5394	26.1933		38.306	595100000	28		tr|N0E0B6|N0E0B6_9MICO Uncharacterized protein OS=Tetrasphaera elongata Lp2 GN=BN10_1390003 PE=4 SV=1
	0.641411	0.0715108	N0E161	31.383	31.2535	31.3578	31.3612	31.3627	31.1467	31.2845	31.2755		323.31	18915000000	324		tr|N0E161|N0E161_9MICO Fe(3+)-binding periplasmic protein OS=Tetrasphaera elongata Lp2 GN=fbpA PE=4 SV=1
	1.09256	0.0714259	N0E575	30.3384	30.2434	30.3571	30.3741	30.2233	30.3061	30.2459	30.252		323.31	9185500000	188		tr|N0E575|N0E575_9MICO Acetate kinase OS=Tetrasphaera elongata Lp2 GN=ackA PE=3 SV=1
	0.63808	0.0714083	N0DZ87	31.2797	31.1971	31.1476	31.2401	31.096	31.2806	31.1011	31.1012		323.31	17534000000	506		tr|N0DZ87|N0DZ87_9MICO Cyanophycin synthetase OS=Tetrasphaera elongata Lp2 GN=cphA PE=4 SV=1
	0.204075	0.0714049	N0E045	28.6004	28.1877	28.6397	28.5069	28.6605	28.422	28.3529	28.2136		200.97	2528100000	114		tr|N0E045|N0E045_9MICO Uncharacterized protein OS=Tetrasphaera elongata Lp2 GN=BN10_540077 PE=4 SV=1
	0.398828	0.0706453	N0E2T0	32.4144	32.1016	32.3783	32.1796	32.2433	32.1743	32.2065	32.1672		323.31	34504000000	448		tr|N0E2T0|N0E2T0_9MICO Putative Jag-like protein OS=Tetrasphaera elongata Lp2 GN=BN10_490010 PE=4 SV=1
	0.152137	0.0694261	N0E3J4	26.4535	26.5078	26.8344	26.4447	26.3681	26.8979	26.4921	26.2047		90.739	777920000	47		tr|N0E3J4|N0E3J4_9MICO Pup--protein ligase OS=Tetrasphaera elongata Lp2 GN=pafA PE=3 SV=1
	0.232142	0.0693488	N0DY30	29.8734	29.6066	29.8073	29.6295	29.8824	29.4901	29.4872	29.7796		298.42	6156900000	164		tr|N0DY30|N0DY30_9MICO Ribosome-binding ATPase YchF OS=Tetrasphaera elongata Lp2 GN=engD PE=3 SV=1
	0.245066	0.0689063	N0E2N3	26.5931	26.3803	26.8407	26.6027	26.7217	26.5089	26.4903	26.4204		82.226	724420000	32		tr|N0E2N3|N0E2N3_9MICO Putative flavoprotein OS=Tetrasphaera elongata Lp2 GN=BN10_470030 PE=4 SV=1
	0.130391	0.068696	N0E590	25.8717	25.6568	25.7793	25.8513	26.0755	26.0058	25.2753	25.5278		34.187	462590000	27		tr|N0E590|N0E590_9MICO 10 kDa chaperonin OS=Tetrasphaera elongata Lp2 GN=BN10_820017 PE=4 SV=1
	0.31509	0.0667081	N0E4U1	29.0125	29.1523	29.247	29.1664	29.1834	28.8565	29.1169	29.1547		254.27	3975500000	137		tr|N0E4U1|N0E4U1_9MICO Pyridoxine/pyridoxamine 5-phosphate oxidase OS=Tetrasphaera elongata Lp2 GN=pdxH PE=3 SV=1
	0.277027	0.0650573	N0DZ84	29.9242	29.9083	30.1097	30.0356	30.1766	29.7963	29.8923	29.8525		323.31	7360200000	166		tr|N0DZ84|N0DZ84_9MICO Translation initiation factor IF-2 OS=Tetrasphaera elongata Lp2 GN=infB PE=3 SV=1
	0.449285	0.064671	N0DZK3	27.6558	27.7272	27.7652	27.6376	27.5466	27.561	27.6235	27.7959		92.601	1471700000	35		tr|N0DZK3|N0DZK3_9MICO Demethylmenaquinone methyltransferase OS=Tetrasphaera elongata Lp2 GN=menG PE=3 SV=1
	0.286006	0.0641794	N0DXE0	28.0369	28.0811	28.3798	27.9967	28.0324	27.99	28.1487	28.0666		99.169	2074700000	71		tr|N0DXE0|N0DXE0_9MICO Ornithine carbamoyltransferase OS=Tetrasphaera elongata Lp2 GN=argF PE=3 SV=1
	0.0519962	0.0630226	N0E3B1	24.5035	24.2181	24.6216	24.1625	23.3438	24.4862	24.1034	25.3202		12.594	137100000	11		tr|N0E3B1|N0E3B1_9MICO ABC transporter, ATP-binding subunit OS=Tetrasphaera elongata Lp2 GN=BN10_920007 PE=3 SV=1
	0.260283	0.0626969	N0DY11	30.8496	30.6967	30.6018	30.6565	30.4343	30.8112	30.5792	30.7291		323.31	11974000000	261		tr|N0DY11|N0DY11_9MICO GMP synthase [glutamine-hydrolyzing] OS=Tetrasphaera elongata Lp2 GN=guaA PE=3 SV=1
	0.170771	0.0619645	N0E3L1	27.9058	27.7135	27.8205	27.5813	27.5877	27.9768	27.7927	27.4159		187.78	1620300000	82		tr|N0E3L1|N0E3L1_9MICO Uncharacterized protein OS=Tetrasphaera elongata Lp2 GN=BN10_1710004 PE=4 SV=1
	0.109839	0.061893	N0E627	27.4492	27.628	27.6027	27.6736	27.2022	28.0729	27.2356	27.5952		84.684	1415900000	37		tr|N0E627|N0E627_9MICO Uncharacterized protein OS=Tetrasphaera elongata Lp2 GN=BN10_730010 PE=4 SV=1
	0.363499	0.0615072	N0DYV0	29.8734	29.8223	29.9588	29.8797	29.7914	30.0118	29.6917	29.7932		110.26	6362400000	90		tr|N0DYV0|N0DYV0_9MICO Uncharacterized protein OS=Tetrasphaera elongata Lp2 GN=BN10_1050005 PE=4 SV=1
	0.12285	0.0606594	N0DZE2	28.0001	27.309	27.7044	27.2524	27.5375	27.519	27.3517	27.6152		198.3	1376000000	48		tr|N0DZE2|N0DZE2_9MICO Homoserine dehydrogenase OS=Tetrasphaera elongata Lp2 GN=hom PE=3 SV=1
	0.0640532	0.0600753	N0DXE7	24.9596	25.1359	24.6467	24.9848	24.4165	24.4789	25.7882	24.803		49.052	161720000	6		tr|N0DXE7|N0DXE7_9MICO Uncharacterized protein OS=Tetrasphaera elongata Lp2 GN=BN10_1070013 PE=4 SV=1
	0.116731	0.0600228	N0E0B4	28.0398	27.8134	27.7615	27.6844	27.284	27.9052	27.7613	28.1085		43.191	1610000000	34		tr|N0E0B4|N0E0B4_9MICO Ribulose-phosphate 3-epimerase OS=Tetrasphaera elongata Lp2 GN=rpe PE=3 SV=1
	0.0363987	0.0597906	N0DZC6	25.8383	25.7355	25.9068	25.4579	24.1417	25.9974	25.7471	26.8131		38.517	343630000	14		tr|N0DZC6|N0DZC6_9MICO Hemerythrin HHE cation binding domain protein OS=Tetrasphaera elongata Lp2 GN=BN10_460013 PE=4 SV=1
	0.300598	0.0597668	N0E1P7	28.2933	28.0579	28.3286	28.2251	28.1764	28.018	28.1709	28.3006		111.74	2151300000	75		tr|N0E1P7|N0E1P7_9MICO Uncharacterized protein OS=Tetrasphaera elongata Lp2 GN=BN10_300032 PE=4 SV=1
	0.200896	0.0592403	N0E255	33.3282	33.3629	33.0063	33.3349	33.0437	33.4039	33.2471	33.1006		323.31	70767000000	772		tr|N0E255|N0E255_9MICO 30S ribosomal protein S17 OS=Tetrasphaera elongata Lp2 GN=rpsQ PE=3 SV=1
	0.2349	0.0592313	N0E0D7	28.2028	28.2102	28.4557	28.1968	28.0107	28.1656	28.2624	28.3898		103.05	2295500000	83		tr|N0E0D7|N0E0D7_9MICO Lysine 5,6-aminomutase alpha subunit OS=Tetrasphaera elongata Lp2 GN=BN10_560035 PE=4 SV=1
	0.0645328	0.0591464	N0E536	25.2239	25.1486	24.89	25.2496	24.3038	24.9969	25.1326	25.8422		25.744	264370000	16		tr|N0E536|N0E536_9MICO Putative two-component system DNA-binding response regulator OS=Tetrasphaera elongata Lp2 GN=BN10_80002 PE=4 SV=1
	0.139664	0.0577602	N0E5L3	26.8784	26.4946	27.1151	26.5221	26.8306	26.6849	26.6551	26.6085		37.742	731650000	30		tr|N0E5L3|N0E5L3_9MICO Thioredoxin (Modular protein) OS=Tetrasphaera elongata Lp2 GN=BN10_910011 PE=4 SV=1
	0.0776038	0.0574384	N0E572	24.4694	24.5663	24.1811	25.1178	24.6777	24.3294	24.1442	24.9535		18.139	167590000	17		tr|N0E572|N0E572_9MICO Putative polyphosphate kinase (Could be polyphosphate AMP phosphotransferase (Pap)) OS=Tetrasphaera elongata Lp2 GN=BN10_810018 PE=4 SV=1
	0.164723	0.0564632	N0E0I1	28.0797	27.8472	28.3596	28.0868	28.2642	27.9854	27.8841	28.0137		111.24	1968900000	49		tr|N0E0I1|N0E0I1_9MICO Stearoyl-CoA 9-desaturase OS=Tetrasphaera elongata Lp2 GN=desA PE=4 SV=1
	0.472804	0.0563955	N0DY45	33.8995	33.7718	33.7584	33.7822	33.8524	33.6577	33.699	33.7772		323.31	102770000000	1001		tr|N0DY45|N0DY45_9MICO DNA-directed RNA polymerase subunit alpha OS=Tetrasphaera elongata Lp2 GN=rpoA PE=3 SV=1
	0.435051	0.0558424	N0DXS4	29.125	29.1198	29.074	28.9183	28.943	29.0883	28.9824	29		207.36	3833800000	102		tr|N0DXS4|N0DXS4_9MICO Putative transcriptional regulator with cyclic nucleotide-binding domain protein OS=Tetrasphaera elongata Lp2 GN=BN10_1270011 PE=4 SV=1
	0.190192	0.055584	N0DY47	26.954	27.0255	27.365	27.0565	26.9779	26.9534	26.9937	27.2538		53.322	985480000	16		tr|N0DY47|N0DY47_9MICO Translation initiation factor IF-1 OS=Tetrasphaera elongata Lp2 GN=infA PE=3 SV=1
	0.137276	0.0523062	N0E1M4	26.9655	27.1469	26.8642	27.0789	27.0293	26.6305	27.2568	26.9296		42.491	927310000	33		tr|N0E1M4|N0E1M4_9MICO Two component transcriptional regulator, LuxR family OS=Tetrasphaera elongata Lp2 GN=BN10_690002 PE=4 SV=1
	0.361428	0.0522194	N0DY33	29.0541	28.8534	28.9463	29.0458	28.8267	28.9255	28.9129	29.0257		307.14	3622600000	154		tr|N0DY33|N0DY33_9MICO Putative NAD-dependent malic enzyme 3 (NAD-dependent malic enzyme (Conversion of malate into pyruvate)) OS=Tetrasphaera elongata Lp2 GN=BN10_1380009 PE=3 SV=1
	0.0787251	0.0508399	N0DYP9	28.7587	28.0448	28.8485	28.3276	28.6295	28.708	28.3166	28.1222		143.06	3073200000	157		tr|N0DYP9|N0DYP9_9MICO Uncharacterized protein OS=Tetrasphaera elongata Lp2 GN=BN10_230025 PE=4 SV=1
	0.173538	0.0508304	N0DZL5	29.106	28.9312	29.2199	28.9968	29.2804	28.9479	28.9837	28.8386		297.55	3884800000	91		tr|N0DZL5|N0DZL5_9MICO Uncharacterized protein OS=Tetrasphaera elongata Lp2 GN=BN10_1210007 PE=4 SV=1
	0.083872	0.0508022	N0DXM7	24.9462	24.8618	25.404	24.617	25.1944	24.5158	24.8842	25.0314		26.21	215610000	10		tr|N0DXM7|N0DXM7_9MICO Uncharacterized protein OS=Tetrasphaera elongata Lp2 GN=BN10_1200006 PE=4 SV=1
	0.255873	0.0506024	N0E556	27.2364	27.0227	27.0358	27.3252	27.1768	27.1318	27.0672	27.0418		109.96	1035500000	43		tr|N0E556|N0E556_9MICO Fused enoyl-CoA hydratase and epimerase and isomerase 3-hydroxyacyl-CoA dehydrogenase OS=Tetrasphaera elongata Lp2 GN=BN10_810004 PE=4 SV=1
	0.327541	0.0490856	N0E2D0	33.9991	34.0653	34.0294	34.2157	34.1354	33.9838	34.05	33.9439		323.31	121120000000	602		tr|N0E2D0|N0E2D0_9MICO 50S ribosomal protein L22 OS=Tetrasphaera elongata Lp2 GN=rplV PE=3 SV=1
	0.375823	0.0485144	N0DXD6	27.3354	27.1851	27.4466	27.3252	27.2888	27.2692	27.3097	27.2305		73.873	1210100000	27		tr|N0DXD6|N0DXD6_9MICO Uncharacterized protein OS=Tetrasphaera elongata Lp2 GN=BN10_1050003 PE=4 SV=1
	0.216796	0.0479436	N0E3P7	28.4063	28.598	28.3512	28.3651	28.5229	28.2532	28.2815	28.4712		233.29	2588200000	100		tr|N0E3P7|N0E3P7_9MICO Carbamoyl-phosphate synthase small chain OS=Tetrasphaera elongata Lp2 GN=pyrAA PE=3 SV=1
	0.105138	0.0472922	N0DZC2	28.9702	28.9528	28.5235	28.9078	28.7751	29.0841	28.4646	28.8413		111.61	3169100000	73		tr|N0DZC2|N0DZC2_9MICO S-(Hydroxymethyl)mycothiol dehydrogenase OS=Tetrasphaera elongata Lp2 GN=BN10_1100009 PE=3 SV=1
	0.0802925	0.0472083	N0E502	25.097	25.845	25.4399	25.7905	25.8473	25.3692	25.3037	25.4634		42.01	337530000	18		tr|N0E502|N0E502_9MICO GCN5-related N-acetyltransferase OS=Tetrasphaera elongata Lp2 GN=BN10_760039 PE=4 SV=1
	0.456325	0.0466957	N0E2Z0	32.6955	32.7066	32.7958	32.7085	32.7293	32.615	32.7657	32.6095		323.31	46525000000	674		tr|N0E2Z0|N0E2Z0_9MICO Putative citrate synthase 2 (CitA) OS=Tetrasphaera elongata Lp2 GN=BN10_510003 PE=3 SV=1
	0.0847756	0.0454826	N0DY87	25.7139	26.1858	25.8158	26.2024	26.0614	26.2433	25.5483	25.8828		31.294	472500000	20		tr|N0DY87|N0DY87_9MICO Uncharacterized protein OS=Tetrasphaera elongata Lp2 GN=BN10_1380013 PE=4 SV=1
	0.0878566	0.0452361	N0E6C6	28.9214	29.1652	29.1933	29.3862	29.5993	28.963	29.0148	28.9081		303.72	4412500000	175		tr|N0E6C6|N0E6C6_9MICO Uncharacterized protein OS=Tetrasphaera elongata Lp2 GN=BN10_890018 PE=4 SV=1
	0.134881	0.0448146	N0DYK8	28.663	28.69	28.9308	28.799	29.0301	28.5212	28.7248	28.6275		168.19	3402500000	103		tr|N0DYK8|N0DYK8_9MICO Putative quinone oxidoreductase OS=Tetrasphaera elongata Lp2 GN=BN10_230026 PE=4 SV=1
	0.117131	0.0447116	N0E1E8	26.8085	27.064	26.9878	27.1303	27.2516	27.0493	26.6931	26.8178		89.529	1175900000	44		tr|N0E1E8|N0E1E8_9MICO Uncharacterized protein OS=Tetrasphaera elongata Lp2 GN=BN10_230018 PE=4 SV=1
	0.205034	0.044663	N0E2V9	25.5333	25.6146	25.5666	25.2806	25.4496	25.5488	25.4786	25.3393		63.97	329520000	32		tr|N0E2V9|N0E2V9_9MICO Acetyltransferase OS=Tetrasphaera elongata Lp2 GN=BN10_520022 PE=4 SV=1
	0.095725	0.0441136	N0E3N0	26.622	26.248	26.3998	26.861	26.7503	26.4975	26.2511	26.4554		71.036	684840000	26		tr|N0E3N0|N0E3N0_9MICO Zinc protease OS=Tetrasphaera elongata Lp2 GN=BN10_1730011 PE=3 SV=1
	0.0914586	0.0436001	N0DZ25	26.8264	26.5908	26.8101	26.2194	26.4452	26.5849	26.3963	26.8458		32.845	717850000	33		tr|N0DZ25|N0DZ25_9MICO Phosphatidylserine decarboxylase proenzyme OS=Tetrasphaera elongata Lp2 GN=psd PE=4 SV=1
	0.0485034	0.0430865	N0E2M9	25.5894	25.0159	25.3099	25.3905	25.9448	25.5597	24.9497	24.6792		14.614	304210000	32		tr|N0E2M9|N0E2M9_9MICO Membrane protein oxaA OS=Tetrasphaera elongata Lp2 GN=oxaA PE=3 SV=1
	0.245542	0.0409703	N0E0K6	25.8923	25.7958	25.9181	25.6709	25.7924	25.7645	25.8709	25.6853		27.922	410400000	22		tr|N0E0K6|N0E0K6_9MICO Alkaline phosphatase OS=Tetrasphaera elongata Lp2 GN=BN10_570034 PE=4 SV=1
	0.108971	0.0406199	N0E0F0	28.2986	27.9351	27.7467	27.7851	27.7711	28.0278	27.8526	27.9515		205.11	1725400000	55		tr|N0E0F0|N0E0F0_9MICO Putative transferase OS=Tetrasphaera elongata Lp2 GN=BN10_580013 PE=4 SV=1
	0.174927	0.0397911	N0E257	30.9331	30.7095	30.8265	30.6443	30.6511	30.653	30.7387	30.9113		323.31	12418000000	262		tr|N0E257|N0E257_9MICO D-3-phosphoglycerate dehydrogenase OS=Tetrasphaera elongata Lp2 GN=serA PE=3 SV=1
	0.254588	0.0384555	N0E0T9	28.3886	28.1713	28.3547	28.2269	28.2917	28.3179	28.1812	28.1968		152.6	2152300000	72		tr|N0E0T9|N0E0T9_9MICO Uncharacterized protein OS=Tetrasphaera elongata Lp2 GN=BN10_600006 PE=4 SV=1
	0.211109	0.0377674	N0E3Q2	29.2319	28.9531	28.9944	29.013	28.9454	29.0616	28.958	29.0765		323.31	3825500000	151		tr|N0E3Q2|N0E3Q2_9MICO Phosphate acetyltransferase OS=Tetrasphaera elongata Lp2 GN=pta PE=4 SV=1
	0.178786	0.0376368	N0E214	29.8893	29.8904	30.0938	29.8583	29.9692	29.7233	29.9979	29.8907		323.31	7003700000	270		tr|N0E214|N0E214_9MICO Protease II OS=Tetrasphaera elongata Lp2 GN=BN10_300066 PE=4 SV=1
	0.270144	0.0373878	N0DYV1	29.4362	29.2136	29.3278	29.2156	29.2336	29.2182	29.306	29.2858		323.31	4641100000	164		tr|N0DYV1|N0DYV1_9MICO Putative carboxyl transferase (Putative Propionyl-CoA carboxylase beta chain or putative methylmalonyl caboxyltransferase) OS=Tetrasphaera elongata Lp2 GN=BN10_30011 PE=4 SV=1
	0.126309	0.0372806	N0E4J9	28.4849	28.4737	28.3128	28.6211	28.5327	28.3591	28.2213	28.6304		212.71	2551200000	113		tr|N0E4J9|N0E4J9_9MICO Diaminopimelate epimerase OS=Tetrasphaera elongata Lp2 GN=dapF PE=3 SV=1
	0.0648495	0.0366626	N0E0D8	25.9063	26.3357	25.8416	26.1281	26.4626	25.8824	25.6767	26.0433		52.358	462540000	23		tr|N0E0D8|N0E0D8_9MICO D-isomer specific 2-hydroxyacid dehydrogenase,NAD-binding OS=Tetrasphaera elongata Lp2 GN=BN10_140003 PE=3 SV=1
	0.129821	0.035706	N0E019	26.9292	27.1786	26.9687	27.1121	27.0408	26.9538	26.8229	27.2282		69.437	970040000	36		tr|N0E019|N0E019_9MICO N5-carboxyaminoimidazole ribonucleotide synthase OS=Tetrasphaera elongata Lp2 GN=purK PE=3 SV=1
	0.0523206	0.0349302	N0E3Q1	31.5987	31.313	31.9503	31.7275	31.0729	31.5961	31.9222	31.8586		235.92	22948000000	198		tr|N0E3Q1|N0E3Q1_9MICO Superoxide dismutase (Ni) OS=Tetrasphaera elongata Lp2 GN=sodN PE=4 SV=1
	0.184114	0.0344357	N0DZF1	30.0129	30.0441	30.1629	30.0288	30.1322	29.8441	30.1021	30.0326		323.31	7753900000	127		tr|N0DZF1|N0DZF1_9MICO Uncharacterized protein OS=Tetrasphaera elongata Lp2 GN=BN10_1130007 PE=4 SV=1
	0.108463	0.0343418	N0DYB0	26.715	26.335	26.3932	26.3662	26.4779	26.6062	26.3127	26.2751		40.459	672770000	41		tr|N0DYB0|N0DYB0_9MICO Probable dual-specificity RNA methyltransferase RlmN OS=Tetrasphaera elongata Lp2 GN=rlmN PE=3 SV=1
	0.211104	0.0340881	N0DXJ0	30.0186	29.8302	29.9638	29.8399	29.756	29.9632	29.8798	29.9171		323.31	7144200000	220		tr|N0DXJ0|N0DXJ0_9MICO Arginyl-tRNA synthetase (Modular protein) OS=Tetrasphaera elongata Lp2 GN=BN10_1140030 PE=3 SV=1
	0.0556072	0.032949	N0E4Y0	25.4645	25.5232	26.0376	25.9163	26.0001	25.9227	25.513	25.3739		22.018	305520000	11		tr|N0E4Y0|N0E4Y0_9MICO Dolichol-phosphate mannosyltransferase, fused to C-terminaluncharacterized domain OS=Tetrasphaera elongata Lp2 GN=BN10_520050 PE=4 SV=1
	0.0865409	0.0327425	N0E3S4	26.4492	26.1048	26.6954	26.2357	26.3421	26.3375	26.2246	26.45		45.647	635340000	21		tr|N0E3S4|N0E3S4_9MICO Uncharacterized protein OS=Tetrasphaera elongata Lp2 GN=BN10_990017 PE=4 SV=1
	0.160643	0.0320511	N0E0C0	30.2423	29.9506	30.1984	30.2737	30.1728	30.0707	30.1454	30.1478		186.7	8687300000	118		tr|N0E0C0|N0E0C0_9MICO Uncharacterized protein OS=Tetrasphaera elongata Lp2 GN=BN10_560005 PE=4 SV=1
	0.0794784	0.031683	N0E4Q5	26.8832	26.3221	26.6382	26.5997	26.6103	26.3971	26.8024	26.5066		52.305	769140000	38		tr|N0E4Q5|N0E4Q5_9MICO Putative Luciferase family protein OS=Tetrasphaera elongata Lp2 GN=BN10_690004 PE=4 SV=1
	0.0867291	0.0316744	N0E3S7	26.5408	26.1825	26.1346	25.9961	26.063	26.0813	26.2724	26.3106		86.493	532890000	31		tr|N0E3S7|N0E3S7_9MICO Uncharacterized protein OS=Tetrasphaera elongata Lp2 GN=BN10_190010 PE=4 SV=1
	0.0558173	0.029911	N0DXK4	26.214	26.3226	26.5422	26.0139	26.622	26.3394	26.0987	25.9129		18.712	584490000	16		tr|N0DXK4|N0DXK4_9MICO Uncharacterized protein OS=Tetrasphaera elongata Lp2 GN=BN10_1180003 PE=4 SV=1
	0.0963351	0.0296345	N0E6F1	25.955	25.7855	25.8042	25.613	25.8073	25.5365	25.7345	25.9608		52.392	411790000	18		tr|N0E6F1|N0E6F1_9MICO Uncharacterized protein OS=Tetrasphaera elongata Lp2 GN=BN10_930008 PE=4 SV=1
	0.100395	0.0294223	N0E6G8	29.3866	29.4452	29.4491	29.5174	29.4749	29.6777	29.3418	29.1862		323.31	5186500000	156		tr|N0E6G8|N0E6G8_9MICO Aspartate carbamoyltransferase OS=Tetrasphaera elongata Lp2 GN=pyrB PE=3 SV=1
	0.0877234	0.0293245	N0E540	28.153	28.161	28.0606	27.9033	27.9534	28.3353	28.029	27.8429		160.7	2061900000	82		tr|N0E540|N0E540_9MICO Putative thioredoxin reductase OS=Tetrasphaera elongata Lp2 GN=BN10_800015 PE=4 SV=1
	0.0395275	0.0280628	N0E2N6	25.5395	25.2474	25.7839	25.2712	25.3233	26.051	25.1018	25.2535		21.314	320810000	27		tr|N0E2N6|N0E2N6_9MICO Dephospho-CoA kinase OS=Tetrasphaera elongata Lp2 GN=coaE PE=3 SV=1
	0.106946	0.0276976	N0E141	30.6198	30.6361	30.6253	30.6257	30.7308	30.7903	30.3966	30.4784		323.31	11046000000	293		tr|N0E141|N0E141_9MICO Putative long-chain fatty-acid CoA ligase OS=Tetrasphaera elongata Lp2 GN=BN10_170004 PE=4 SV=1
	0.0644792	0.0271125	N0E5A2	27.1511	27.569	26.9628	27.272	27.0794	27.4382	27.1845	27.1443		72.855	1020100000	47		tr|N0E5A2|N0E5A2_9MICO ATP-dependent RNA helicase OS=Tetrasphaera elongata Lp2 GN=BN10_820037 PE=4 SV=1
	0.16425	0.0269537	N0E5Y5	24.8243	24.9503	24.8602	24.8663	24.702	24.8573	24.9827	24.8512		20.628	214060000	17		tr|N0E5Y5|N0E5Y5_9MICO Competence/damage-inducible protein cinA OS=Tetrasphaera elongata Lp2 GN=BN10_680015 PE=4 SV=1
	0.0895245	0.026443	N0DXU5	28.4621	28.2681	28.5753	28.2709	28.5713	28.3446	28.3534	28.2013		187.82	2463700000	103		tr|N0DXU5|N0DXU5_9MICO ABC-type multidrug transport system ATPase component OS=Tetrasphaera elongata Lp2 GN=BN10_1140034 PE=3 SV=1
	0.133859	0.0261106	N0E4J4	31.4338	31.4394	31.3589	31.2927	31.4143	31.4821	31.3439	31.18		323.31	19549000000	564		tr|N0E4J4|N0E4J4_9MICO Carbamoyl-phosphate synthase L chain ATP-binding protein OS=Tetrasphaera elongata Lp2 GN=BN10_460045 PE=4 SV=1
	0.155173	0.0239167	N0DZB9	27.8119	27.9328	27.997	28.0327	28.0001	27.9029	27.8387	27.937		77.756	1768400000	61		tr|N0DZB9|N0DZB9_9MICO NADH-quinone oxidoreductase subunit I OS=Tetrasphaera elongata Lp2 GN=nuoI PE=3 SV=1
	0.142334	0.0228171	N0E2G7	27.7702	27.6552	27.5192	27.5934	27.6256	27.6815	27.6017	27.5379		72.551	1351500000	55		tr|N0E2G7|N0E2G7_9MICO NAD kinase OS=Tetrasphaera elongata Lp2 GN=nadK PE=3 SV=1
	0.0689036	0.0215597	N0E4Z6	33.1348	33.2559	32.9136	33.2677	33.2023	33.2883	33.0399	32.9552		323.31	63200000000	598		tr|N0E4Z6|N0E4Z6_9MICO 50S ribosomal protein L16 OS=Tetrasphaera elongata Lp2 GN=rplP PE=3 SV=1
	0.116292	0.0203938	N0E1B1	28.664	28.5163	28.5651	28.5551	28.5892	28.6644	28.3944	28.5709		262.11	2865700000	109		tr|N0E1B1|N0E1B1_9MICO Putative enzyme OS=Tetrasphaera elongata Lp2 GN=BN10_230019 PE=4 SV=1
	0.050323	0.0194235	N0DXU1	25.89	25.7146	25.9226	26.1361	25.8788	26.089	25.6122	26.0056		23.077	463500000	14		tr|N0DXU1|N0DXU1_9MICO Peptide chain release factor 1 OS=Tetrasphaera elongata Lp2 GN=prfA PE=3 SV=1
	0.0603573	0.0190477	N0E587	26.9819	26.7163	26.5309	26.5235	26.6786	26.7085	26.581	26.7083		82.995	707350000	25		tr|N0E587|N0E587_9MICO Putative hippurate hydrolase protein OS=Tetrasphaera elongata Lp2 GN=BN10_820012 PE=4 SV=1
	0.0544576	0.0179405	N0E476	25.9835	25.9121	26.1486	26.1234	26.1821	25.7271	26.1075	26.079		59.141	486720000	17		tr|N0E476|N0E476_9MICO Ribosomal-protein-alanine N-acetyltransferase OS=Tetrasphaera elongata Lp2 GN=BN10_630010 PE=4 SV=1
	0.0706537	0.0178776	N0E254	28.1375	28.0138	27.7328	27.8768	27.9016	27.9938	27.898	27.896		103.8	1753000000	77		tr|N0E254|N0E254_9MICO Phosphopantetheine adenylyltransferase OS=Tetrasphaera elongata Lp2 GN=coaD PE=3 SV=1
	0.0569318	0.017365	N0E0H6	27.5054	27.4991	27.4458	27.6307	27.7979	27.3592	27.4547	27.3997		138.47	1313200000	75		tr|N0E0H6|N0E0H6_9MICO Putative 8-amino-7-oxononanoate synthase/2-amino-3-ketobutyrate coenzyme A ligase OS=Tetrasphaera elongata Lp2 GN=BN10_1390012 PE=3 SV=1
	0.0541146	0.0172892	N0DZJ7	28.1063	27.6303	28.0679	27.9141	27.8665	27.9372	27.9886	27.8571		174.09	1839600000	59		tr|N0DZJ7|N0DZJ7_9MICO Uncharacterized protein OS=Tetrasphaera elongata Lp2 GN=BN10_120033 PE=4 SV=1
	0.0436358	0.0170474	N0E5T4	27.1359	27.0458	27.4204	27.1725	26.8819	27.1425	27.3012	27.3808		97.639	1091400000	46		tr|N0E5T4|N0E5T4_9MICO Predicted hydrolase or acyltransferase of alpha/beta superfamily OS=Tetrasphaera elongata Lp2 GN=BN10_960010 PE=4 SV=1
	0.104916	0.0168862	N0DY86	28.5797	28.473	28.5251	28.4408	28.591	28.349	28.4894	28.5216		208.28	2723700000	90		tr|N0DY86|N0DY86_9MICO Signal recognition particle receptor FtsY OS=Tetrasphaera elongata Lp2 GN=ftsY PE=3 SV=1
	0.0824342	0.0164747	N0DXG0	28.562	28.5814	28.5623	28.6688	28.4376	28.6114	28.5101	28.7493		184.53	2709200000	103		tr|N0DXG0|N0DXG0_9MICO Cyanophycin synthetase OS=Tetrasphaera elongata Lp2 GN=BN10_1080036 PE=4 SV=1
	0.0289707	0.0150752	N0E3D8	26.1909	25.9642	26.233	26.5745	26.1263	25.9832	26.2156	26.5771		15.92	613330000	16		tr|N0E3D8|N0E3D8_9MICO Uncharacterized protein OS=Tetrasphaera elongata Lp2 GN=BN10_1600013 PE=4 SV=1
	0.0919799	0.0149102	N0E569	25.7884	25.8505	26.0021	25.7625	25.8413	25.777	25.8285	25.8969		43.388	430150000	26		tr|N0E569|N0E569_9MICO Uncharacterized protein OS=Tetrasphaera elongata Lp2 GN=BN10_810013 PE=4 SV=1
	0.0832308	0.0139771	N0DZW6	28.3147	28.3071	28.0828	28.2091	28.1897	28.2771	28.1521	28.2389		290.3	2108900000	80		tr|N0DZW6|N0DZW6_9MICO Uncharacterized protein OS=Tetrasphaera elongata Lp2 GN=BN10_1260004 PE=4 SV=1
	0.047318	0.0139303	N0E276	28.2932	28.1179	28.5916	28.2192	28.3261	28.2619	28.3034	28.2748		128.12	2343700000	87		tr|N0E276|N0E276_9MICO Barbiturase OS=Tetrasphaera elongata Lp2 GN=bar PE=4 SV=1
	0.0399045	0.0137997	N0DXL2	26.4403	26.5081	26.3564	26.0368	26.4238	26.4153	26.1789	26.2684		69.934	715890000	36		tr|N0DXL2|N0DXL2_9MICO Uncharacterized protein OS=Tetrasphaera elongata Lp2 GN=BN10_120004 PE=4 SV=1
	0.0452487	0.0116091	N0E2V2	26.4028	26.5136	26.4265	26.6362	26.4103	26.606	26.3149	26.6014		38.289	586730000	27		tr|N0E2V2|N0E2V2_9MICO Von Willebrand factor, type A OS=Tetrasphaera elongata Lp2 GN=BN10_50017 PE=4 SV=1
	0.0287168	0.0100946	N0E3K0	27.6518	27.2066	27.3899	27.3313	27.2413	27.5876	27.4078	27.3027		105.5	1229800000	58		tr|N0E3K0|N0E3K0_9MICO Putative ribose-phosphate pyrophosphokinase OS=Tetrasphaera elongata Lp2 GN=BN10_560059 PE=4 SV=1
	0.037478	0.00979042	N0DZQ9	28.6319	28.6595	28.6796	28.5956	28.4463	28.6446	28.5689	28.8677		195.63	2840100000	90		tr|N0DZQ9|N0DZQ9_9MICO DNA gyrase subunit A OS=Tetrasphaera elongata Lp2 GN=gyrA PE=3 SV=1
	0.0193396	0.00957203	N0E1J0	27.5736	27.3372	27.7829	27.5481	27.2921	27.8786	27.3393	27.6937		152.1	1385100000	60		tr|N0E1J0|N0E1J0_9MICO Amylosucrase OS=Tetrasphaera elongata Lp2 GN=ams PE=4 SV=1
	0.0512598	0.00869894	N0E1F9	29.2155	29.1015	29.3008	29.1818	29.1469	29.3198	29.1416	29.1566		323.31	4485700000	159		tr|N0E1F9|N0E1F9_9MICO Putative aminotransferase OS=Tetrasphaera elongata Lp2 GN=yfbQ PE=4 SV=1
	0.0310755	0.00854635	N0DXZ9	27.3398	27.377	27.568	27.4635	27.5347	27.3306	27.591	27.2577		84.429	1236700000	39		tr|N0DXZ9|N0DXZ9_9MICO DNA gyrase subunit B OS=Tetrasphaera elongata Lp2 GN=gyrB PE=3 SV=1
	0.0143344	0.00807333	N0DZ15	25.3256	25.214	25.7319	24.9994	25.1711	25.5687	25.4184	25.0803		45.162	283200000	20		tr|N0DZ15|N0DZ15_9MICO Uncharacterized protein OS=Tetrasphaera elongata Lp2 GN=BN10_360045 PE=4 SV=1
	0.0219406	0.00662279	N0E133	27.1949	26.8163	27.1579	27.0403	26.8832	27.0713	27.0748	27.1535		61.957	989040000	26		tr|N0E133|N0E133_9MICO Molybdopterin molybdenumtransferase 2 OS=Tetrasphaera elongata Lp2 GN=moaE PE=4 SV=1
	0.0184149	0.00587893	N0E381	27.928	28.0248	28.1356	27.9445	28.2322	27.7866	28.0801	27.9105		172.46	1947500000	109		tr|N0E381|N0E381_9MICO Putative acyl-CoA dehydrogenase fadE25 OS=Tetrasphaera elongata Lp2 GN=fadE PE=3 SV=1
	0.019545	0.00536156	N0DZL4	27.1576	27.2006	27.4394	27.1957	27.4417	27.1499	27.1712	27.2092		108.7	1149300000	58		tr|N0DZL4|N0DZL4_9MICO Uncharacterized protein OS=Tetrasphaera elongata Lp2 GN=BN10_1180005 PE=4 SV=1
	0.0171931	0.00434208	N0E0B3	32.5804	32.4853	32.4719	32.5254	32.3133	32.6908	32.4529	32.5886		323.31	42528000000	819		tr|N0E0B3|N0E0B3_9MICO Alpha-1,4 glucan phosphorylase OS=Tetrasphaera elongata Lp2 GN=glgP PE=3 SV=1
	0.0115059	0.00407314	N0DXE8	29.0216	28.9644	28.913	29.2895	29.0901	29.2368	29.0165	28.8288		137.83	3869900000	98		tr|N0DXE8|N0DXE8_9MICO Uncharacterized protein OS=Tetrasphaera elongata Lp2 GN=BN10_1070018 PE=4 SV=1
	0.0164077	0.00366497	N0E6H4	28.4544	28.4411	28.4022	28.3969	28.2286	28.4599	28.4048	28.5866		149.91	2476000000	86		tr|N0E6H4|N0E6H4_9MICO Inositol-1-monophosphatase OS=Tetrasphaera elongata Lp2 GN=suhB PE=4 SV=1
	0.00874388	0.00356722	N0DYW6	25.3079	25.5982	25.5208	25.9124	25.7367	25.5558	25.474	25.5586		40.082	351800000	21		tr|N0DYW6|N0DYW6_9MICO RecBCD enzyme subunit RecB OS=Tetrasphaera elongata Lp2 GN=recB PE=3 SV=1
	0.00911404	0.00335121	N0DYG2	28.7707	28.8277	28.9495	28.9917	28.6913	29.04	28.6861	29.1088		146.38	3620500000	75		tr|N0DYG2|N0DYG2_9MICO UPF0109 protein ylqC OS=Tetrasphaera elongata Lp2 GN=ylqC PE=3 SV=1
	0.000170969	6.86646e-05	N0DXH9	29.7471	29.8248	29.7449	29.7509	29.7703	30.1304	29.5125	29.6543		147.63	5777700000	74		tr|N0DXH9|N0DXH9_9MICO Stage V sporulation protein K (Modular protein) OS=Tetrasphaera elongata Lp2 GN=BN10_1130015 PE=4 SV=1
	0.0058536	-0.00204372	N0DZD5	33.1521	32.9366	32.8255	33.0373	33.0755	33.161	32.9956	32.7276		323.31	58587000000	624		tr|N0DZD5|N0DZD5_9MICO 30S ribosomal protein S18 OS=Tetrasphaera elongata Lp2 GN=rpsR PE=3 SV=1
	0.00133281	-0.00309277	N0E092	26.2203	26.0292	25.5888	23.5219	25.7606	23.9794	25.638	25.9946		28.513	400430000	21		tr|N0E092|N0E092_9MICO Hydrolase OS=Tetrasphaera elongata Lp2 GN=BN10_560066 PE=4 SV=1
	0.0209248	-0.00324583	N0E3N1	30.4864	30.3781	30.5234	30.4263	30.4178	30.5701	30.464	30.3753		323.31	10313000000	308		tr|N0E3N1|N0E3N1_9MICO Glycogen operon protein GlgX homolog OS=Tetrasphaera elongata Lp2 GN=glgX PE=4 SV=1
	0.0144858	-0.00377655	N0E3G3	30.7877	31.0449	31.0062	30.8879	30.982	30.7534	30.9415	31.0648		323.31	13822000000	188		tr|N0E3G3|N0E3G3_9MICO Orotidine 5-phosphate decarboxylase OS=Tetrasphaera elongata Lp2 GN=pyrF PE=3 SV=1
	0.0150972	-0.00387716	N0E262	27.8703	27.9464	28.0227	28.115	27.9131	27.839	28.0914	28.1264		87.823	1898500000	57		tr|N0E262|N0E262_9MICO Methionine aminopeptidase OS=Tetrasphaera elongata Lp2 GN=map PE=3 SV=1
	0.0213377	-0.00424576	N0E3K2	30.982	30.8377	30.9631	30.8108	30.7796	31.0339	30.8909	30.9064		323.31	14521000000	432		tr|N0E3K2|N0E3K2_9MICO Aminopeptidase N OS=Tetrasphaera elongata Lp2 GN=pepN PE=4 SV=1
	0.011795	-0.00487423	N0E3G1	28.5396	28.6775	28.96	28.5821	28.6719	28.8319	28.4145	28.8604		151.36	2867000000	64		tr|N0E3G1|N0E3G1_9MICO Putative esterase VC_A0580 OS=Tetrasphaera elongata Lp2 GN=BN10_1630004 PE=4 SV=1
	0.016095	-0.00622797	N0E107	27.2673	27.5528	27.4652	27.5861	27.2396	27.7536	27.3797	27.5234		119.2	1204000000	39		tr|N0E107|N0E107_9MICO Gamma-glutamyltranspeptidase OS=Tetrasphaera elongata Lp2 GN=BN10_60001 PE=4 SV=1
	0.0378574	-0.00664949	N0DZU8	25.8951	25.9558	25.9523	25.8058	25.7994	25.9426	26.0295	25.8641		38.458	424060000	11		tr|N0DZU8|N0DZU8_9MICO Shikimate kinase OS=Tetrasphaera elongata Lp2 GN=aroK PE=3 SV=1
	0.0199188	-0.00836802	N0DXM3	26.964	27.2446	27.5029	27.1034	27.3096	26.9777	27.3584	27.2028		59.727	1072100000	36		tr|N0DXM3|N0DXM3_9MICO Imidazole glycerol phosphate synthase subunit HisH OS=Tetrasphaera elongata Lp2 GN=hisH PE=3 SV=1
	0.0215102	-0.00854111	N0E134	27.7516	27.4762	27.9593	27.6627	27.978	27.6424	27.704	27.5596		84.729	1559400000	85		tr|N0E134|N0E134_9MICO Cytidine deaminase OS=Tetrasphaera elongata Lp2 GN=Cda PE=4 SV=1
	0.00584226	-0.00964785	N0E4X4	24.1685	25.4297	24.8883	23.6986	25.7505	24.1104	24.1714	24.1914		21.262	169850000	11		tr|N0E4X4|N0E4X4_9MICO 3-isopropylmalate dehydratase large subunit 1 OS=Tetrasphaera elongata Lp2 GN=leuC PE=4 SV=1
	0.0339548	-0.0102248	N0E2A0	29.2702	29.4205	29.2999	29.2927	29.4301	29.5468	29.1036	29.2437		323.31	4812300000	197		tr|N0E2A0|N0E2A0_9MICO Nitrate reductase (Alpha subunit) OS=Tetrasphaera elongata Lp2 GN=narG PE=4 SV=1
	0.0523483	-0.0102539	N0E1I7	32.5269	32.5273	32.6697	32.6413	32.5402	32.7499	32.63	32.486		323.31	44737000000	453		tr|N0E1I7|N0E1I7_9MICO Purine nucleoside phosphorylase OS=Tetrasphaera elongata Lp2 GN=punA PE=3 SV=1
	0.0296591	-0.0103712	N0E5B1	28.113	27.667	27.9408	28.0097	28.0378	27.7725	28.0882	27.8734		179.29	1866500000	69		tr|N0E5B1|N0E5B1_9MICO Putative peroxidase ywbN OS=Tetrasphaera elongata Lp2 GN=ywbN PE=4 SV=1
	0.0329505	-0.0104151	N0E3X1	29.4366	29.2453	29.4297	29.2687	29.1203	29.2809	29.4777	29.5432		270.06	4658300000	127		tr|N0E3X1|N0E3X1_9MICO Histidine ammonia-lyase OS=Tetrasphaera elongata Lp2 GN=hutH PE=3 SV=1
	0.0426219	-0.0115671	N0DY06	26.3847	26.3066	26.2196	26.2788	26.1802	26.1404	26.5005	26.4149		69.386	619130000	22		tr|N0DY06|N0DY06_9MICO Phosphate-binding protein PstS OS=Tetrasphaera elongata Lp2 GN=pstS PE=3 SV=1
	0.0309134	-0.0116682	N0DZ40	30.0765	30.0739	30.1376	30.0092	30.3893	29.7764	30.1441	30.0342		323.31	7978800000	199		tr|N0DZ40|N0DZ40_9MICO RNA polymerase-binding protein RbpA OS=Tetrasphaera elongata Lp2 GN=rbpA PE=3 SV=1
	0.0309751	-0.0124221	N0E0P1	27.0635	27.1363	27.3874	27.1683	27.2183	27.4651	27.235	26.8868		140.1	1086200000	30		tr|N0E0P1|N0E0P1_9MICO Long-chain-fatty-acid--CoA ligase OS=Tetrasphaera elongata Lp2 GN=lcfB PE=4 SV=1
	0.0297764	-0.0131726	N0E0J9	26.679	26.7465	26.5176	26.4993	26.3653	27.0147	26.6047	26.5103		81.004	793990000	32		tr|N0E0J9|N0E0J9_9MICO Precorrin-4 C(11)-methyltransferase OS=Tetrasphaera elongata Lp2 GN=cobM PE=3 SV=1
	0.0556841	-0.0137982	N0E1G4	24.8194	25.1609	24.8747	24.8591	24.8569	25.0396	24.913	24.9598		9.2108	239500000	16		tr|N0E1G4|N0E1G4_9MICO Pyridoxal-dependent decarboxylase OS=Tetrasphaera elongata Lp2 GN=BN10_640027 PE=3 SV=1
	0.0418072	-0.0139523	N0E043	27.5051	27.1698	27.3204	27.4185	27.1211	27.3641	27.43	27.5543		105.07	1231200000	38		tr|N0E043|N0E043_9MICO Maltooligosyl trehalose synthase OS=Tetrasphaera elongata Lp2 GN=treY PE=4 SV=1
	0.0205466	-0.0142503	N0E0M8	25.8432	26.5731	26.0085	26.3339	26.1259	25.7718	26.5687	26.3493		65.662	539800000	18		tr|N0E0M8|N0E0M8_9MICO Signal peptidase I OS=Tetrasphaera elongata Lp2 GN=BN10_1460014 PE=3 SV=1
	0.0445555	-0.0146699	N0E0G8	27.1262	27.1016	26.9682	26.9954	27.0323	26.8754	26.9706	27.3718		118.11	945140000	34		tr|N0E0G8|N0E0G8_9MICO Methylmalonate semialdehyde dehydrogenase (Acylating) 2 OS=Tetrasphaera elongata Lp2 GN=iolA PE=3 SV=1
	0.0363768	-0.015676	N0E6F4	27.2866	27.364	27.4823	27.0551	27.0628	27.4062	27.1839	27.5978		40.067	1265700000	29		tr|N0E6F4|N0E6F4_9MICO Transcriptional repressor NrdR OS=Tetrasphaera elongata Lp2 GN=nrdR PE=3 SV=1
	0.117212	-0.0166612	N0DY35	30.0972	30.0062	29.9916	30.0373	29.9573	30.1808	30.0141	30.0469		323.31	7479000000	133		tr|N0DY35|N0DY35_9MICO Uncharacterized protein OS=Tetrasphaera elongata Lp2 GN=BN10_130061 PE=3 SV=1
	0.0414677	-0.0168877	N0DYT0	27.587	27.2551	27.7657	27.4295	27.7442	27.3054	27.5546	27.5007		106.04	1387700000	55		tr|N0DYT0|N0DYT0_9MICO Putative enzyme OS=Tetrasphaera elongata Lp2 GN=BN10_300024 PE=4 SV=1
	0.0775126	-0.0170541	N0E690	28.4789	28.6637	28.3364	28.4671	28.516	28.4432	28.4384	28.6166		184.48	2682900000	94		tr|N0E690|N0E690_9MICO 1-deoxy-D-xylulose-5-phosphate synthase OS=Tetrasphaera elongata Lp2 GN=dxs PE=3 SV=1
	0.0760363	-0.0180635	N0E1U0	29.4572	29.1408	29.3717	29.1436	29.3698	29.2645	29.3101	29.2411		306.8	4514700000	150		tr|N0E1U0|N0E1U0_9MICO L-aspartate oxidase OS=Tetrasphaera elongata Lp2 GN=BN10_1210020 PE=4 SV=1
	0.0429926	-0.0184426	N0E4I9	29.1542	28.6557	29.1007	28.604	28.9874	28.8034	28.9117	28.8858		208.33	3482800000	114		tr|N0E4I9|N0E4I9_9MICO UPF0234 protein BN10_460040 OS=Tetrasphaera elongata Lp2 GN=BN10_460040 PE=3 SV=1
	0.0624711	-0.0194178	N0DZJ3	27.8926	28.2444	28.3258	28.0745	28.2988	28.0998	28.0489	28.1675		134.89	2107700000	72		tr|N0DZJ3|N0DZJ3_9MICO Uncharacterized protein OS=Tetrasphaera elongata Lp2 GN=BN10_120028 PE=4 SV=1
	0.0338799	-0.0205798	N0E1I9	29.0104	28.7305	29.1329	28.7785	29.3941	28.505	29.0208	28.8146		71.541	3689400000	64		tr|N0E1I9|N0E1I9_9MICO Uncharacterized protein OS=Tetrasphaera elongata Lp2 GN=BN10_650014 PE=4 SV=1
	0.0877236	-0.0211143	N0E2W8	32.8503	32.689	32.7261	32.6296	32.5281	32.8546	32.7781	32.8186		323.31	50694000000	332		tr|N0E2W8|N0E2W8_9MICO Acyl carrier protein OS=Tetrasphaera elongata Lp2 GN=acpA PE=3 SV=1
	0.0722077	-0.0212526	N0E5D0	29.3037	29.3776	29.3971	29.4132	29.473	29.0883	29.5266	29.4885		240.04	4859900000	133		tr|N0E5D0|N0E5D0_9MICO ATP phosphoribosyltransferase OS=Tetrasphaera elongata Lp2 GN=hisG PE=3 SV=1
	0.0554793	-0.0214591	N0DXY1	24.2312	24.1512	23.6605	24.1488	23.963	24.0813	24.152	24.0812		34.32	128480000	9		tr|N0DXY1|N0DXY1_9MICO Pyrroline-5-carboxylate reductase OS=Tetrasphaera elongata Lp2 GN=proC PE=3 SV=1
	0.0415354	-0.0222797	N0DYL6	29.8032	29.7609	29.9015	29.761	30.1179	30.1381	29.6816	29.3781		221.51	7064700000	155		tr|N0DYL6|N0DYL6_9MICO dTDP-4-dehydrorhamnose 3,5-epimerase OS=Tetrasphaera elongata Lp2 GN=rmlC PE=4 SV=1
	0.161795	-0.0224438	N0E3D9	32.5638	32.6295	32.5616	32.646	32.7309	32.677	32.5245	32.5583		323.31	46476000000	926		tr|N0E3D9|N0E3D9_9MICO Aconitate hydratase OS=Tetrasphaera elongata Lp2 GN=citB PE=3 SV=1
	0.0484322	-0.0224986	N0E0J4	25.7449	25.7865	26.2405	26.0199	26.309	25.8868	25.8933	25.7927		41.872	473450000	13		tr|N0E0J4|N0E0J4_9MICO Cobalamin biosynthesis protein CobIJ OS=Tetrasphaera elongata Lp2 GN=cobIJ PE=4 SV=1
	0.083122	-0.0237055	N0E208	25.2597	25.4217	25.5975	25.7057	25.5764	25.442	25.4956	25.5654		23.131	356070000	19		tr|N0E208|N0E208_9MICO ErfK/YbiS/YcfS/YnhG OS=Tetrasphaera elongata Lp2 GN=BN10_360013 PE=4 SV=1
	0.0946566	-0.0240054	N0E3U8	28.8447	29.012	28.791	28.9127	29.0327	29.0613	28.8296	28.7329		157.39	3489500000	104		tr|N0E3U8|N0E3U8_9MICO Long-chain-fatty-acid--CoA ligase OS=Tetrasphaera elongata Lp2 GN=lcfB PE=4 SV=1
	0.0640772	-0.0241156	N0DXM4	24.5231	24.1762	24.2753	24.2003	24.5542	24.3551	24.33	24.032		10	148290000	12		tr|N0DXM4|N0DXM4_9MICO Transcriptional regulator OS=Tetrasphaera elongata Lp2 GN=BN10_120040 PE=4 SV=1
	0.0624084	-0.0245886	N0E2W1	27.8663	27.9535	27.5828	27.7657	28.1323	27.7951	27.7564	27.5829		79.448	1640600000	57		tr|N0E2W1|N0E2W1_9MICO NUDIX hydrolase OS=Tetrasphaera elongata Lp2 GN=BN10_500006 PE=4 SV=1
	0.0297371	-0.0249176	N0DZG1	24.9171	24.6528	25.7755	24.7721	24.9398	25.4516	24.8605	24.9652		47.412	268880000	19		tr|N0DZG1|N0DZG1_9MICO Cob(I)yrinic acid a,c-diamide adenosyltransferase OS=Tetrasphaera elongata Lp2 GN=BN10_1140002 PE=4 SV=1
	0.0587851	-0.0255656	N0DY41	28.2291	28.3918	28.1434	28.3455	27.9406	28.6103	28.2349	28.4263		188.61	2309700000	90		tr|N0DY41|N0DY41_9MICO Glutaryl-CoA dehydrogenase, mitochondrial OS=Tetrasphaera elongata Lp2 GN=GCDH PE=3 SV=1
	0.414832	-0.0263109	N0E5J1	31.4458	31.4316	31.5495	31.5077	31.4997	31.5081	31.5056	31.5264		323.31	20203000000	376		tr|N0E5J1|N0E5J1_9MICO Methionine--tRNA ligase OS=Tetrasphaera elongata Lp2 GN=metG PE=3 SV=1
	0.106488	-0.0271382	N0DZZ1	27.6438	27.3278	27.5623	27.2972	27.4039	27.5889	27.463	27.4839		133.88	1352800000	62		tr|N0DZZ1|N0DZZ1_9MICO LPPG:FO 2-phospho-L-lactate transferase OS=Tetrasphaera elongata Lp2 GN=cofD PE=3 SV=1
	0.0628836	-0.0274911	N0DYT6	26.7089	26.2963	26.6175	26.312	26.7286	26.6641	26.2353	26.4166		103.38	666360000	47		tr|N0DYT6|N0DYT6_9MICO 5-methylthioadenosine/S-adenosylhomocysteine deaminase OS=Tetrasphaera elongata Lp2 GN=BN10_280004 PE=4 SV=1
	0.0879814	-0.027648	N0E152	26.7949	26.9922	26.6165	26.9075	27.0811	26.8091	26.7025	26.8289		74.912	899970000	48		tr|N0E152|N0E152_9MICO Uncharacterized protein OS=Tetrasphaera elongata Lp2 GN=BN10_1700011 PE=4 SV=1
	0.106655	-0.0276723	N0DZ13	26.99	27.0509	26.9277	27.1204	26.8682	27.1183	26.9559	27.2573		61.789	988430000	32		tr|N0DZ13|N0DZ13_9MICO Uncharacterized protein OS=Tetrasphaera elongata Lp2 GN=BN10_1080004 PE=4 SV=1
	0.0752547	-0.0276966	N0E415	25.7339	25.3264	25.3909	25.3361	25.3158	25.7255	25.3797	25.4772		35.839	312710000	25		tr|N0E415|N0E415_9MICO Adenine phosphoribosyltransferase OS=Tetrasphaera elongata Lp2 GN=apt PE=3 SV=1
	0.392301	-0.0280085	N0E3A3	33.5265	33.4389	33.4846	33.4842	33.5459	33.565	33.47	33.4653		323.31	84411000000	1200		tr|N0E3A3|N0E3A3_9MICO Isocitrate dehydrogenase (NADP) OS=Tetrasphaera elongata Lp2 GN=icd PE=4 SV=1
	0.288931	-0.0281687	N0DXS8	33.3108	33.3386	33.3984	33.301	33.4155	33.3326	33.2848	33.4286		323.31	75567000000	839		tr|N0DXS8|N0DXS8_9MICO Succinyl-CoA ligase [ADP-forming] subunit beta OS=Tetrasphaera elongata Lp2 GN=sucC PE=3 SV=1
	0.195063	-0.0289106	N0DZ11	29.4895	29.6562	29.6711	29.6907	29.702	29.7107	29.6548	29.5557		323.31	5611100000	187		tr|N0DZ11|N0DZ11_9MICO Glycerol kinase OS=Tetrasphaera elongata Lp2 GN=glpK PE=3 SV=1
	0.0473921	-0.0297966	N0E5A1	26.9441	27.4387	26.7789	27.0208	26.9739	27.5778	26.8893	26.8609		53.418	1012900000	20		tr|N0E5A1|N0E5A1_9MICO GDP-mannose 4,6 dehydratase 2 OS=Tetrasphaera elongata Lp2 GN=MUR PE=4 SV=1
	0.158138	-0.0302315	N0E4I1	29.9164	29.8119	30.0185	29.8975	29.8078	30.0986	29.9406	29.9183		323.31	6902300000	191		tr|N0E4I1|N0E4I1_9MICO 4-hydroxy-tetrahydrodipicolinate synthase OS=Tetrasphaera elongata Lp2 GN=dapA PE=3 SV=1
	0.102383	-0.030293	N0DYX4	28.1154	28.3731	28.2961	28.2255	28.2855	28.0434	28.2995	28.5029		122.71	2236800000	77		tr|N0DYX4|N0DYX4_9MICO Putative tetR-family transcriptional regulator OS=Tetrasphaera elongata Lp2 GN=BN10_1070006 PE=4 SV=1
	0.0439568	-0.0304456	N0E396	25.5296	25.8493	24.9203	25.5381	25.4531	25.8186	25.1278	25.5596		32.345	279420000	14		tr|N0E396|N0E396_9MICO Diacylglycerol O-acyltransferase OS=Tetrasphaera elongata Lp2 GN=BN10_900043 PE=3 SV=1
	0.236829	-0.030755	N0E5N7	30.2096	30.3828	30.2505	30.3651	30.387	30.3831	30.2652	30.2956		323.31	9046700000	249		tr|N0E5N7|N0E5N7_9MICO Putative Cystathionine beta-synthase OS=Tetrasphaera elongata Lp2 GN=cbs PE=4 SV=1
	0.155783	-0.0310388	N0E4A7	27.2687	27.3408	27.2247	27.4012	27.2655	27.3883	27.2053	27.5004		66.172	1188900000	61		tr|N0E4A7|N0E4A7_9MICO Putative molybdopterin biosynthesis protein OS=Tetrasphaera elongata Lp2 GN=BN10_630009 PE=4 SV=1
	0.178859	-0.0331774	N0E409	28.542	28.5549	28.6197	28.7299	28.5322	28.74	28.5568	28.7501		196.63	2846100000	90		tr|N0E409|N0E409_9MICO Segregation and condensation protein B OS=Tetrasphaera elongata Lp2 GN=BN10_590042 PE=4 SV=1
	0.260871	-0.0345592	N0E6G7	30.076	30.0558	29.8984	30.1246	30.0415	30.0565	30.0514	30.1436		323.31	7738100000	218		tr|N0E6G7|N0E6G7_9MICO Dihydroorotate dehydrogenase OS=Tetrasphaera elongata Lp2 GN=pyrD PE=3 SV=1
	0.0997591	-0.0346556	N0E3Z1	30.0728	30.1414	30.4713	30.1232	29.9978	30.2922	30.4253	30.232		75.752	8614900000	70		tr|N0E3Z1|N0E3Z1_9MICO Glycine cleavage system H protein OS=Tetrasphaera elongata Lp2 GN=gcvH PE=3 SV=1
	0.792507	-0.0352573	N0E5F4	32.7914	32.841	32.887	32.8499	32.8645	32.9074	32.8704	32.868		323.31	55191000000	712		tr|N0E5F4|N0E5F4_9MICO 2,3-bisphosphoglycerate-dependent phosphoglycerate mutase OS=Tetrasphaera elongata Lp2 GN=gpmA PE=3 SV=1
	0.321336	-0.0353513	N0E436	27.135	27.1001	27.1352	27.0909	27.0175	27.2068	27.1708	27.2074		90.923	1007300000	52		tr|N0E436|N0E436_9MICO 3-oxoacyl-(Acyl-carrier-protein) reductase OS=Tetrasphaera elongata Lp2 GN=fabG PE=4 SV=1
	0.221322	-0.0360928	N0E291	28.6348	28.4345	28.4389	28.4663	28.4925	28.5418	28.4368	28.6477		248.42	2580400000	85		tr|N0E291|N0E291_9MICO Uncharacterized protein OS=Tetrasphaera elongata Lp2 GN=BN10_770004 PE=4 SV=1
	0.252987	-0.0380411	N0E5A5	32.0589	32.0115	31.9959	32.0746	32.099	32.2137	31.9315	32.0489		323.31	30983000000	420		tr|N0E5A5|N0E5A5_9MICO Electron transfer flavoprotein subunit beta OS=Tetrasphaera elongata Lp2 GN=etfB PE=4 SV=1
	0.219149	-0.0401969	N0DZX1	25.8821	25.962	26.1612	25.9522	26.1274	25.9625	26.0731	25.9553		64.222	474270000	29		tr|N0DZX1|N0DZX1_9MICO Uncharacterized protein OS=Tetrasphaera elongata Lp2 GN=BN10_520018 PE=4 SV=1
	0.143376	-0.0402017	N0DZ62	28.2469	28.2074	28.0916	28.0925	28.1115	28.4937	28.1267	28.0673		115.24	2099300000	55		tr|N0DZ62|N0DZ62_9MICO Putative polyprenyl diphosphate synthase OS=Tetrasphaera elongata Lp2 GN=BN10_460009 PE=3 SV=1
	0.132917	-0.0403409	N0E0M1	26.7421	26.5584	26.417	26.6292	26.8906	26.5664	26.5874	26.4638		94.335	760480000	30		tr|N0E0M1|N0E0M1_9MICO Prephenate dehydrogenase OS=Tetrasphaera elongata Lp2 GN=BN10_590040 PE=4 SV=1
	0.427348	-0.0404906	N0E5P0	30.9273	30.8314	30.9355	30.8955	30.8759	30.8965	30.9466	31.0326		323.31	13861000000	288		tr|N0E5P0|N0E5P0_9MICO Cystathionine gamma-lyase and homocysteine gamma-lyase for reverse transsulfuration pathway OS=Tetrasphaera elongata Lp2 GN=mccB PE=3 SV=1
	0.0766572	-0.0405364	N0DY09	26.4223	26.2605	26.0894	25.9001	25.9485	26.6527	26.0987	26.1346		98.024	543730000	30		tr|N0DY09|N0DY09_9MICO Uncharacterized protein OS=Tetrasphaera elongata Lp2 GN=BN10_1260021 PE=3 SV=1
	0.550355	-0.0406537	N0DZG2	29.9995	29.9836	29.9261	29.9898	29.9296	30.0176	30.0544	30.0601		323.31	7420100000	226		tr|N0DZG2|N0DZG2_9MICO Putative 3-hydroxyacyl-CoA dehydrogenase (Beta-hydroxybutyryl-CoA dehydrogenase (Hbd, mmgB, BHBD)) OS=Tetrasphaera elongata Lp2 GN=BN10_1170022 PE=4 SV=1
	0.167827	-0.0406857	N0E1G7	29.7335	29.5381	29.9829	29.6933	29.7894	29.7337	29.8154	29.772		272.88	6118300000	135		tr|N0E1G7|N0E1G7_9MICO Uncharacterized protein OS=Tetrasphaera elongata Lp2 GN=BN10_680034 PE=4 SV=1
	0.0309429	-0.0408983	N0DZB0	24.2567	24.3939	24.422	24.5526	25.4	23.2443	24.4158	24.7287		20.024	154280000	7		tr|N0DZB0|N0DZB0_9MICO ABC transporter related OS=Tetrasphaera elongata Lp2 GN=BN10_440005 PE=3 SV=1
	0.333204	-0.041235	N0E260	33.6232	33.7347	33.5784	33.7704	33.7203	33.6725	33.7931	33.6857		323.31	100240000000	925		tr|N0E260|N0E260_9MICO 30S ribosomal protein S19 OS=Tetrasphaera elongata Lp2 GN=rpsS PE=3 SV=1
	0.344646	-0.0416727	N0E2P1	33.1734	33.0616	33.2628	33.1031	33.1782	33.2623	33.1302	33.1968		323.31	65707000000	744		tr|N0E2P1|N0E2P1_9MICO 30S ribosomal protein S1 OS=Tetrasphaera elongata Lp2 GN=rpsA PE=4 SV=1
	0.138197	-0.0423427	N0E0N5	27.4637	27.4038	27.4112	27.4062	27.5723	27.7342	27.2438	27.304		121.3	1346300000	65		tr|N0E0N5|N0E0N5_9MICO Putative hydroxymethylglutaryl-CoA lyase OS=Tetrasphaera elongata Lp2 GN=BN10_1490008 PE=4 SV=1
	0.138673	-0.0430336	N0E0X4	28.5836	28.741	28.6891	28.6332	28.4659	28.5651	28.8525	28.9355		220.95	2929800000	80		tr|N0E0X4|N0E0X4_9MICO MaoC domain protein dehydratase OS=Tetrasphaera elongata Lp2 GN=BN10_1070014 PE=4 SV=1
	0.333699	-0.0430493	N0DY18	31.0332	30.8648	31.0611	30.9063	31.0852	30.9956	30.9548	31.002		174.79	14612000000	218		tr|N0DY18|N0DY18_9MICO Uncharacterized protein OS=Tetrasphaera elongata Lp2 GN=BN10_130006 PE=4 SV=1
	0.218775	-0.0445242	N0DXM6	28.8308	28.7094	28.669	28.7036	28.6727	28.955	28.6368	28.8264		266.83	3039900000	77		tr|N0DXM6|N0DXM6_9MICO Macrolide 2-phosphotransferase OS=Tetrasphaera elongata Lp2 GN=BN10_1070002 PE=4 SV=1
	0.114175	-0.0453663	N0E030	33.9615	33.4601	34.0264	33.8175	34.0445	33.7107	33.9244	33.7674		323.31	106980000000	942		tr|N0E030|N0E030_9MICO Putative Uncharacterized ABC transporter solute-binding protein yclQ OS=Tetrasphaera elongata Lp2 GN=BN10_540052 PE=4 SV=1
	0.0838038	-0.0454297	N0E338	26.5028	26.2751	26.1	26.5387	26.789	26.5662	26.1057	26.1375		59.08	593290000	33		tr|N0E338|N0E338_9MICO Uncharacterized protein OS=Tetrasphaera elongata Lp2 GN=BN10_920028 PE=4 SV=1
	0.0215581	-0.0474658	N0E091	24.0419	25.0727	23.3203	21.5506	23.6461	23.6337	23.68	23.2156		12.865	55220000	7		tr|N0E091|N0E091_9MICO Nicotinate-nucleotide--dimethylbenzimidazole phosphoribosyltransferase OS=Tetrasphaera elongata Lp2 GN=BN10_1370001 PE=4 SV=1
	0.276106	-0.0479279	N0E3K4	26.3021	26.3549	26.4505	26.2476	26.5395	26.3546	26.2635	26.3892		66.337	638960000	31		tr|N0E3K4|N0E3K4_9MICO Homocysteine-N5-methyltetrahydrofolate transmethylase, B12-dependent OS=Tetrasphaera elongata Lp2 GN=metH PE=4 SV=1
	0.224003	-0.0486116	N0DYD2	28.9216	28.816	28.964	28.6636	28.8192	28.9371	28.7795	29.0238		318.09	3347500000	143		tr|N0DYD2|N0DYD2_9MICO DNA polymerase OS=Tetrasphaera elongata Lp2 GN=polA PE=3 SV=1
	0.144087	-0.0490713	N0DYM7	28.3877	28.5585	28.1448	28.4326	28.3822	28.6536	28.1949	28.4892		199.33	2557800000	112		tr|N0DYM7|N0DYM7_9MICO DNA methylase N-4/N-6 domain protein OS=Tetrasphaera elongata Lp2 GN=BN10_20011 PE=4 SV=1
	0.254071	-0.0518031	N0DXP3	30.0877	30.0133	30.1638	29.9595	30.001	30.3052	30.1133	30.0118		323.31	7734400000	240		tr|N0DXP3|N0DXP3_9MICO Peptide chain release factor 2 OS=Tetrasphaera elongata Lp2 GN=prfB PE=3 SV=1
	0.0447773	-0.0526295	N0E418	23.5586	24.3231	23.8549	23.832	24.4444	24.7378	23.2845	23.3124		16.987	91829000	6		tr|N0E418|N0E418_9MICO Holliday junction ATP-dependent DNA helicase RuvA OS=Tetrasphaera elongata Lp2 GN=ruvA PE=3 SV=1
	0.173223	-0.053443	N0E232	27.5645	27.3342	27.5187	27.5925	27.5296	27.8464	27.5001	27.3476		69.013	1350300000	59		tr|N0E232|N0E232_9MICO Putative nitrate reductase (Beta subunit) (NarH) OS=Tetrasphaera elongata Lp2 GN=BN10_750005 PE=4 SV=1
	0.644695	-0.0536594	N0E5K3	33.0425	33.0051	32.9637	33.0251	32.9944	33.1638	33.0366	33.0563		323.31	61156000000	873		tr|N0E5K3|N0E5K3_9MICO Enolase OS=Tetrasphaera elongata Lp2 GN=eno PE=3 SV=1
	0.214233	-0.0542402	N0E5Z1	28.0005	27.9701	27.8897	27.9788	27.8793	28.2931	27.8749	28.0087		89.908	1928000000	79		tr|N0E5Z1|N0E5Z1_9MICO Peptide deformylase OS=Tetrasphaera elongata Lp2 GN=def PE=3 SV=1
	0.109739	-0.0545969	N0E0C7	25.7252	25.2912	25.581	25.8101	25.4503	26.0671	25.6514	25.4571		34.498	342080000	28		tr|N0E0C7|N0E0C7_9MICO Methyltransferase type 11 OS=Tetrasphaera elongata Lp2 GN=BN10_560020 PE=4 SV=1
	0.309776	-0.0547519	N0DY39	29.3895	29.1954	29.2536	29.2953	29.247	29.3036	29.2804	29.5218		299.29	4671800000	138		tr|N0DY39|N0DY39_9MICO Phosphoglucosamine mutase OS=Tetrasphaera elongata Lp2 GN=glmM PE=3 SV=1
	0.259899	-0.0548282	N0E5X5	29.277	29.1764	28.9241	29.2276	29.2573	29.1513	29.136	29.2798		283.03	4213200000	131		tr|N0E5X5|N0E5X5_9MICO Putative enzyme OS=Tetrasphaera elongata Lp2 GN=BN10_660001 PE=3 SV=1
	0.321313	-0.0555615	N0DZ02	28.5603	28.6436	28.5539	28.44	28.4675	28.7613	28.5969	28.5942		133.92	2709900000	79		tr|N0DZ02|N0DZ02_9MICO Putative ATP-dependent RNA helicase OS=Tetrasphaera elongata Lp2 GN=BN10_1070010 PE=3 SV=1
	0.226938	-0.0558624	N0E406	27.3606	27.5854	27.2227	27.5504	27.5985	27.3883	27.4114	27.5444		97.784	1218900000	41		tr|N0E406|N0E406_9MICO GTPase Der OS=Tetrasphaera elongata Lp2 GN=der PE=3 SV=1
	0.158686	-0.0561433	N0E4X2	24.4734	24.0502	24.1897	24.1524	23.9713	24.3367	24.3797	24.4025		8.3798	127820000	11		tr|N0E4X2|N0E4X2_9MICO Putative Isopropylmalate/citramalate isomerase small subunit OS=Tetrasphaera elongata Lp2 GN=BN10_740013 PE=4 SV=1
	0.183126	-0.0562305	N0E1M0	26.1741	26.5482	26.4208	26.4567	26.7062	26.43	26.4072	26.2812		78.391	662530000	33		tr|N0E1M0|N0E1M0_9MICO Pyruvate dehydrogenase E1 component OS=Tetrasphaera elongata Lp2 GN=BN10_680089 PE=4 SV=1
	0.0952117	-0.0563016	N0DXJ2	26.5672	26.5669	25.9956	26.6939	26.8734	26.1429	26.5224	26.51		29.152	680540000	21		tr|N0DXJ2|N0DXJ2_9MICO Uncharacterized protein OS=Tetrasphaera elongata Lp2 GN=BN10_1030001 PE=4 SV=1
	0.0840395	-0.0570521	N0E2M8	26.3193	26.0424	26.2483	26.0011	25.8956	26.8872	25.9086	26.148		72.767	497560000	22		tr|N0E2M8|N0E2M8_9MICO Putative Ferric enterobactin esterase-related protein OS=Tetrasphaera elongata Lp2 GN=BN10_470025 PE=4 SV=1
	0.194233	-0.0575838	N0DYQ0	26.8526	26.9479	26.681	26.5598	26.7023	27.0303	26.6982	26.8409		35.439	789540000	13		tr|N0DYQ0|N0DYQ0_9MICO Aspartate-semialdehyde dehydrogenase OS=Tetrasphaera elongata Lp2 GN=asd PE=3 SV=1
	0.247305	-0.061142	N0E062	28.2222	28.3189	28.0058	28.3506	28.2568	28.3358	28.1242	28.4253		208.8	2258000000	93		tr|N0E062|N0E062_9MICO Type I restriction enzyme EcoprrI M protein OS=Tetrasphaera elongata Lp2 GN=hsdM PE=4 SV=1
	0.389739	-0.0615745	N0DYZ4	29.0577	29.1289	29.2118	29.2008	29.3676	29.1803	29.0823	29.2154		255.12	4431500000	153		tr|N0DYZ4|N0DYZ4_9MICO Putative short chain acyl-CoA dehydrogenase (Putative Butyryl-CoA dehydrogenase) OS=Tetrasphaera elongata Lp2 GN=BN10_1070026 PE=3 SV=1
	0.677395	-0.0625119	N0E686	28.7027	28.7588	28.8601	28.8791	28.8354	28.8417	28.9018	28.8718		205.91	3373200000	111		tr|N0E686|N0E686_9MICO Chaperone protein ClpB OS=Tetrasphaera elongata Lp2 GN=clpB PE=3 SV=1
	0.430671	-0.0628324	N0E322	26.8749	26.6638	26.7975	26.7423	26.8003	26.7428	26.8213	26.9654		107.07	768050000	41		tr|N0E322|N0E322_9MICO Anthranilate synthase component 1 OS=Tetrasphaera elongata Lp2 GN=trpE PE=4 SV=1
	0.79296	-0.0630112	N0E176	30.0548	29.9464	30.0056	30.0682	30.0376	30.1642	30.0656	30.0596		323.31	7996600000	287		tr|N0E176|N0E176_9MICO Putative Glycogen synthase OS=Tetrasphaera elongata Lp2 GN=BN10_1080042 PE=4 SV=1
	0.390561	-0.0636253	N0E3C5	29.3919	29.5064	29.4503	29.5686	29.7034	29.4222	29.5603	29.4857		222.74	5445800000	169		tr|N0E3C5|N0E3C5_9MICO Acyl-CoA thioesterase 2 OS=Tetrasphaera elongata Lp2 GN=tesB PE=4 SV=1
	0.0836705	-0.0640101	N0E5Y6	24.901	25.836	25.2493	25.6013	25.6425	24.9142	25.5482	25.7388		32.979	326660000	20		tr|N0E5Y6|N0E5Y6_9MICO Uncharacterized protein OS=Tetrasphaera elongata Lp2 GN=BN10_680020 PE=4 SV=1
	0.518027	-0.0643802	N0DZV8	30.3042	30.4099	30.1492	30.2774	30.354	30.2943	30.3893	30.3608		280.15	9339500000	165		tr|N0DZV8|N0DZV8_9MICO Succinyl-diaminopimelate desuccinylase OS=Tetrasphaera elongata Lp2 GN=dapE PE=4 SV=1
	0.642618	-0.0648727	N0E229	31.0707	31.0402	31.2175	31.123	31.2007	31.2478	31.1241	31.1383		323.31	16191000000	345		tr|N0E229|N0E229_9MICO Putative GDP-D-mannose dehydratase OS=Tetrasphaera elongata Lp2 GN=BN10_720026 PE=4 SV=1
	0.0340727	-0.0651855	N0E4P9	22.365	25.0816	25.0281	24.4653	24.3096	24.7303	24.2385	23.9223		2.4887	86584000	10		tr|N0E4P9|N0E4P9_9MICO Putative low-affinity inorganic phosphate transporter (Pit) OS=Tetrasphaera elongata Lp2 GN=BN10_690020 PE=4 SV=1
	0.160061	-0.0654292	N0DZ39	27.5149	27.8096	27.3766	27.9303	27.7148	27.6242	27.572	27.9821		84.681	1535000000	47		tr|N0DZ39|N0DZ39_9MICO Integral membrane protein OS=Tetrasphaera elongata Lp2 GN=BN10_300098 PE=4 SV=1
	0.102183	-0.0663815	N0E467	26.2905	26.1511	26.7491	26.1777	26.8616	26.6023	26.075	26.0949		34.721	617890000	30		tr|N0E467|N0E467_9MICO DNA-directed DNA polymerase OS=Tetrasphaera elongata Lp2 GN=dnaE PE=4 SV=1
	0.986979	-0.0664673	N0E408	31.1378	31.1928	31.2632	31.1959	31.2037	31.2909	31.2528	31.3083		323.31	17543000000	405		tr|N0E408|N0E408_9MICO Putative peptidase OS=Tetrasphaera elongata Lp2 GN=BN10_590078 PE=4 SV=1
	0.377763	-0.0670147	N0E528	30.4539	30.3023	30.4087	30.3765	30.3189	30.6466	30.3903	30.4537		323.31	9668800000	262		tr|N0E528|N0E528_9MICO 2,5-diketo-D-gluconic acid reductase B OS=Tetrasphaera elongata Lp2 GN=dkgB PE=4 SV=1
	0.147923	-0.0671716	N0E681	28.5387	28.6079	28.4056	28.5312	28.0876	28.8077	28.7239	28.733		146.37	2500100000	61		tr|N0E681|N0E681_9MICO Alanine racemase OS=Tetrasphaera elongata Lp2 GN=alr PE=3 SV=1
	0.651296	-0.0674415	N0DZ04	30.5718	30.3777	30.4476	30.5482	30.607	30.5585	30.5073	30.5423		323.31	10790000000	282		tr|N0DZ04|N0DZ04_9MICO Putative Citrate lyase, beta subunit OS=Tetrasphaera elongata Lp2 GN=BN10_1070036 PE=4 SV=1
	0.0801951	-0.0675631	N0E2X7	25.4213	24.9698	24.9353	25.177	25.4694	24.3489	25.4233	25.5322		37.17	277330000	18		tr|N0E2X7|N0E2X7_9MICO Uncharacterized protein OS=Tetrasphaera elongata Lp2 GN=BN10_520037 PE=4 SV=1
	0.680076	-0.0677018	N0E347	30.7293	30.7628	30.8585	30.8519	30.8652	30.9499	30.8817	30.7766		323.31	13243000000	249		tr|N0E347|N0E347_9MICO Glycogen operon protein GlgX homolog OS=Tetrasphaera elongata Lp2 GN=BN10_530007 PE=4 SV=1
	0.72698	-0.068274	N0DYL0	30.8724	30.9873	30.9058	31.0688	31.058	30.9934	31.0297	31.0262		323.31	14534000000	331		tr|N0DYL0|N0DYL0_9MICO Putative peptide transport system secreted peptide-binding protein OS=Tetrasphaera elongata Lp2 GN=BN10_1730014 PE=4 SV=1
	0.16582	-0.0688806	N0E5H5	25.9581	26.3262	26.1426	25.8833	26.2779	26.4364	25.9517	25.9197		96.287	489240000	29		tr|N0E5H5|N0E5H5_9MICO Putative tRNA-dihydrouridine synthase OS=Tetrasphaera elongata Lp2 GN=dus PE=4 SV=1
	0.521127	-0.0691004	N0DZI6	30.4571	30.6656	30.5146	30.5934	30.5321	30.7113	30.5885	30.6751		323.31	11123000000	251		tr|N0DZI6|N0DZI6_9MICO 1,4-dihydroxy-2-naphthoyl-CoA synthase OS=Tetrasphaera elongata Lp2 GN=menB PE=3 SV=1
	0.217784	-0.0693216	N0E0B5	30.1164	29.6376	29.8904	29.7781	29.7892	30.1452	29.8588	29.9067		230.31	6601100000	134		tr|N0E0B5|N0E0B5_9MICO Putative enoyl-CoA hydratase echA8 OS=Tetrasphaera elongata Lp2 GN=BN10_570010 PE=3 SV=1
	0.322396	-0.0698018	N0E5X3	27.5561	27.5527	27.9013	27.5326	27.7176	27.6726	27.7677	27.664		96.655	1526200000	61		tr|N0E5X3|N0E5X3_9MICO DNA helicase OS=Tetrasphaera elongata Lp2 GN=BN10_650041 PE=4 SV=1
	0.516557	-0.0706878	N0E0W5	25.7941	25.6399	25.8059	25.7307	25.947	25.8322	25.7232	25.7509		19.562	402030000	10		tr|N0E0W5|N0E0W5_9MICO Proline rich antigenic protein OS=Tetrasphaera elongata Lp2 GN=BN10_1520001 PE=4 SV=1
	0.292481	-0.071147	N0E6A2	28.2303	28.1546	28.0837	28.0038	28.0802	28.2924	28.0009	28.3834		175.74	2100700000	64		tr|N0E6A2|N0E6A2_9MICO Uncharacterized protein OS=Tetrasphaera elongata Lp2 GN=BN10_820025 PE=4 SV=1
	0.549837	-0.0715637	N0DXZ3	27.6086	27.7191	27.5662	27.7718	27.6969	27.7158	27.6905	27.8488		137.55	1491300000	61		tr|N0DXZ3|N0DXZ3_9MICO ABC transporter, ATP-binding protein OS=Tetrasphaera elongata Lp2 GN=BN10_1240001 PE=3 SV=1
	0.134357	-0.0716043	N0DYI2	26.3704	25.6306	26.1491	25.5596	25.9493	25.9256	26.0812	26.0401		47.743	460430000	27		tr|N0DYI2|N0DYI2_9MICO Putative ABC transporter ATP-binding protein OS=Tetrasphaera elongata Lp2 GN=BN10_190009 PE=4 SV=1
	0.332066	-0.0716519	N0E0I0	30.1041	29.8206	30.1913	29.9761	30.1004	30.2158	30.0132	30.0493		150.85	7948200000	109		tr|N0E0I0|N0E0I0_9MICO Uncharacterized protein OS=Tetrasphaera elongata Lp2 GN=BN10_570009 PE=4 SV=1
	0.309299	-0.0719776	N0E0E8	28.1179	27.8512	27.8661	28.0458	27.8666	28.1891	27.9859	28.1273		132.5	2017900000	74		tr|N0E0E8|N0E0E8_9MICO Proteasome subunit alpha OS=Tetrasphaera elongata Lp2 GN=prcA PE=3 SV=1
	0.852569	-0.0744271	N0E0Q3	29.3786	29.4361	29.3733	29.3927	29.5717	29.4738	29.4639	29.3689		323.31	5071300000	190		tr|N0E0Q3|N0E0Q3_9MICO Pyruvate carboxylase OS=Tetrasphaera elongata Lp2 GN=Pyc PE=4 SV=1
	0.206534	-0.074441	N0E6D5	26.4355	26.8032	26.3644	26.6613	26.5247	26.9375	26.5015	26.5985		44.037	701860000	29		tr|N0E6D5|N0E6D5_9MICO Isoprenyl transferase OS=Tetrasphaera elongata Lp2 GN=uppS PE=3 SV=1
	0.3973	-0.0744863	N0E412	30.9341	30.6938	30.8403	30.732	30.7286	31.0032	30.8205	30.9458		323.31	12675000000	303		tr|N0E412|N0E412_9MICO Histidine--tRNA ligase OS=Tetrasphaera elongata Lp2 GN=hisS PE=3 SV=1
	0.341427	-0.0745969	N0DYL3	25.9664	25.8164	25.7787	26.0828	25.8368	26.1291	25.9484	26.0285		38.64	424240000	28		tr|N0DYL3|N0DYL3_9MICO Uncharacterized protein OS=Tetrasphaera elongata Lp2 GN=BN10_1730024 PE=4 SV=1
	0.168399	-0.0749397	N0DYF1	27.1722	27.0002	27.487	27.2007	27.6986	27.1782	27.2122	27.0709		50.636	1099600000	39		tr|N0DYF1|N0DYF1_9MICO Cold shock protein OS=Tetrasphaera elongata Lp2 GN=BN10_1490004 PE=4 SV=1
	0.392721	-0.0749927	N0E1L1	28.5247	28.5887	28.6075	28.4131	28.502	28.6127	28.8086	28.5107		223.9	2720300000	102		tr|N0E1L1|N0E1L1_9MICO FAD dependent oxidoreductase OS=Tetrasphaera elongata Lp2 GN=BN10_1170020 PE=3 SV=1
	0.251295	-0.0770383	N0DXT7	30.206	30.0912	30.5243	30.2615	30.51	30.2524	30.4714	30.1573		258.18	8842700000	137		tr|N0DXT7|N0DXT7_9MICO ATP synthase epsilon chain OS=Tetrasphaera elongata Lp2 GN=atpC PE=3 SV=1
	0.291429	-0.0772228	N0E613	28.8995	28.758	29.2101	28.8803	28.9162	29.1663	29.0131	28.9611		136.16	3779800000	134		tr|N0E613|N0E613_9MICO GTP cyclohydrolase 1 OS=Tetrasphaera elongata Lp2 GN=folEA PE=3 SV=1
	0.414715	-0.0773177	N0E1G6	27.1051	27.3811	27.4549	27.3935	27.4455	27.3803	27.4672	27.3509		91.946	1330500000	56		tr|N0E1G6|N0E1G6_9MICO Putative amino acid hydrolase (putative N-carbamoyl-L-amino acid hydrolase putative allantoate amidohydrolase) OS=Tetrasphaera elongata Lp2 GN=BN10_230038 PE=4 SV=1
	0.240565	-0.0779233	N0DXF4	27.4944	27.5314	27.6661	27.3917	27.3217	27.7731	27.4829	27.8176		104.44	1396400000	47		tr|N0DXF4|N0DXF4_9MICO Glucose-6-phosphate 1-dehydrogenase OS=Tetrasphaera elongata Lp2 GN=zwf PE=3 SV=1
	0.172175	-0.0784802	N0DZJ2	26.0811	26.2523	26.2648	25.5873	26.2911	26.2243	25.9799	26.0042		53.279	494080000	29		tr|N0DZJ2|N0DZJ2_9MICO Ribonuclease H OS=Tetrasphaera elongata Lp2 GN=rnhA PE=3 SV=1
	0.355051	-0.0796442	N0E1N4	31.268	31.1082	31.2075	31.0873	31.1715	31.5074	31.1466	31.164		323.31	16541000000	328		tr|N0E1N4|N0E1N4_9MICO Putative phosphomannomutase OS=Tetrasphaera elongata Lp2 GN=BN10_1190011 PE=3 SV=1
	0.278233	-0.0797772	N0E2J1	28.9473	29.0861	29.2035	29.1767	29.331	29.3923	29.0014	29.0079		273.02	4250500000	186		tr|N0E2J1|N0E2J1_9MICO NADH-quinone oxidoreductase subunit C OS=Tetrasphaera elongata Lp2 GN=nuoC PE=3 SV=1
	0.285724	-0.0802751	N0E394	26.458	26.1683	25.9522	26.0266	26.2538	26.1473	26.213	26.3122		72.187	507110000	33		tr|N0E394|N0E394_9MICO Sensory transduction protein regX3 OS=Tetrasphaera elongata Lp2 GN=regX PE=4 SV=1
	0.245555	-0.0803795	N0E310	28.9919	28.5338	28.9666	28.7831	29.103	28.8611	28.7123	28.9205		209.33	3470800000	137		tr|N0E310|N0E310_9MICO Uncharacterized protein OS=Tetrasphaera elongata Lp2 GN=BN10_520011 PE=4 SV=1
	0.279174	-0.0833282	N0DZZ6	27.8209	27.7667	27.7448	27.8322	28.0241	27.5228	27.898	28.053		212.51	1718200000	44		tr|N0DZZ6|N0DZZ6_9MICO Uncharacterized protein OS=Tetrasphaera elongata Lp2 GN=BN10_130004 PE=4 SV=1
	0.681911	-0.0836177	N0E387	29.7988	29.9022	29.7618	29.8785	29.8478	29.8776	29.8858	30.0646		323.31	6776800000	186		tr|N0E387|N0E387_9MICO Ribonuclease PH OS=Tetrasphaera elongata Lp2 GN=rph PE=3 SV=1
	0.544185	-0.0840087	N0DXF9	26.0765	26.283	26.1778	26.1582	26.242	26.411	26.1305	26.248		54.776	554460000	35		tr|N0DXF9|N0DXF9_9MICO Cyclic pyranopterin monophosphate synthase OS=Tetrasphaera elongata Lp2 GN=moaA PE=3 SV=1
	0.331943	-0.0845914	N0DZ23	29.5549	29.254	29.6296	29.3646	29.416	29.4257	29.6446	29.6551		323.31	5260300000	193		tr|N0DZ23|N0DZ23_9MICO Methylthioribose-1-phosphate isomerase OS=Tetrasphaera elongata Lp2 GN=mtnA PE=3 SV=1
	0.767038	-0.0848875	N0DZI5	30.278	30.1613	30.0725	30.245	30.2594	30.3467	30.205	30.2854		246.51	8443700000	204		tr|N0DZI5|N0DZI5_9MICO Threonine synthase OS=Tetrasphaera elongata Lp2 GN=thrC PE=3 SV=1
	0.528187	-0.0857544	N0E162	29.1996	29.0251	29.3592	29.0816	29.2613	29.259	29.2142	29.274		191.94	4080700000	126		tr|N0E162|N0E162_9MICO Putative Alcohol dehydrogenase OS=Tetrasphaera elongata Lp2 GN=BN10_1730038 PE=4 SV=1
	0.634517	-0.0864434	N0DXN4	27.8183	27.794	27.811	28.0292	27.9394	28.0454	27.9255	27.888		62.887	1896500000	39		tr|N0DXN4|N0DXN4_9MICO Uncharacterized protein OS=Tetrasphaera elongata Lp2 GN=BN10_1210014 PE=4 SV=1
	0.818413	-0.0887251	N0DXU0	32.7124	32.8478	32.8818	32.8329	32.9421	32.7895	32.9588	32.9393		323.31	53624000000	657		tr|N0DXU0|N0DXU0_9MICO Serine hydroxymethyltransferase OS=Tetrasphaera elongata Lp2 GN=glyA PE=3 SV=1
	0.290635	-0.0903621	N0DZ22	27.3052	27.3829	27.1174	27.2848	27.1703	27.5627	27.1502	27.5685		104.33	1143700000	55		tr|N0DZ22|N0DZ22_9MICO Acyl-CoA dehydrogenase domain protein OS=Tetrasphaera elongata Lp2 GN=BN10_1070030 PE=3 SV=1
	1.00969	-0.0913391	N0DYW2	29.1819	29.2729	29.3493	29.279	29.304	29.3721	29.3257	29.4467		301.49	4692600000	134		tr|N0DYW2|N0DYW2_9MICO 1-(5-phosphoribosyl)-5-[(5-phosphoribosylamino)methylideneamino] imidazole-4-carboxamide isomerase OS=Tetrasphaera elongata Lp2 GN=hisA PE=3 SV=1
	0.289711	-0.0916562	N0DZ55	28.3426	28.3932	28.2899	28.3238	28.2849	28.7623	28.1708	28.4979		115.18	2369800000	74		tr|N0DZ55|N0DZ55_9MICO Cyanophycinase OS=Tetrasphaera elongata Lp2 GN=BN10_1080039 PE=4 SV=1
	0.540087	-0.0920038	N0E3J6	27.3451	27.5252	27.398	27.4466	27.5258	27.3385	27.5447	27.6741		34.38	1150600000	30		tr|N0E3J6|N0E3J6_9MICO Uncharacterized protein OS=Tetrasphaera elongata Lp2 GN=BN10_540039 PE=4 SV=1
	0.403802	-0.0936284	N0E323	28.4369	28.7842	28.6024	28.776	28.6539	28.9201	28.7176	28.6824		147.17	3115000000	118		tr|N0E323|N0E323_9MICO Bifunctional protein glmU OS=Tetrasphaera elongata Lp2 GN=BN10_920013 PE=4 SV=1
	0.824445	-0.0936384	N0E237	32.1338	32.0922	32.0935	32.2969	32.2062	32.3331	32.2382	32.2134		323.31	33402000000	488		tr|N0E237|N0E237_9MICO Glutamine synthetase OS=Tetrasphaera elongata Lp2 GN=glnA PE=3 SV=1
	0.633107	-0.0939093	N0E2R7	29.693	29.4653	29.6087	29.6466	29.829	29.7179	29.5918	29.6505		323.31	5838600000	181		tr|N0E2R7|N0E2R7_9MICO Class III stress response-related ATPase, AAA+ superfamily OS=Tetrasphaera elongata Lp2 GN=BN10_480029 PE=4 SV=1
	0.33958	-0.0946102	N0DXI6	28.1136	28.0776	28.3676	28.0156	28.216	28.4609	28.2572	28.0187		187.89	2069800000	74		tr|N0DXI6|N0DXI6_9MICO Uncharacterized protein OS=Tetrasphaera elongata Lp2 GN=BN10_1140015 PE=4 SV=1
	0.589652	-0.0955658	N0E3R9	28.8568	28.7059	28.7931	28.6437	28.684	28.9716	28.8833	28.8428		303.05	3292700000	159		tr|N0E3R9|N0E3R9_9MICO Uncharacterized protein OS=Tetrasphaera elongata Lp2 GN=BN10_190005 PE=4 SV=1
	0.4339	-0.0955939	N0E5B6	26.2511	26.0402	26.2194	26.0157	26.3318	26.0422	26.3762	26.1586		77.48	519110000	18		tr|N0E5B6|N0E5B6_9MICO UDP-N-acetylenolpyruvoylglucosamine reductase OS=Tetrasphaera elongata Lp2 GN=murB PE=3 SV=1
	0.314541	-0.0959358	N0E211	28.6176	28.722	28.7915	28.7145	28.9813	28.7349	28.489	29.0242		103.86	3026200000	54		tr|N0E211|N0E211_9MICO Ubiquinol-cytochrome c reductase cytochrome b subunit OS=Tetrasphaera elongata Lp2 GN=qcrB PE=4 SV=1
	0.152794	-0.0961356	N0E455	25.8458	26.2341	26.0325	26.6598	26.7552	25.9809	26.1621	26.2584		72.895	573070000	29		tr|N0E455|N0E455_9MICO Putative short chain dehydrogenase OS=Tetrasphaera elongata Lp2 GN=BN10_620017 PE=4 SV=1
	0.745526	-0.0973749	N0DYD3	29.7355	29.7977	29.6652	29.6871	29.7664	29.987	29.7361	29.7855		323.31	6213600000	240		tr|N0DYD3|N0DYD3_9MICO Helicase domain protein OS=Tetrasphaera elongata Lp2 GN=BN10_140079 PE=4 SV=1
	0.516547	-0.0980139	N0E3U0	32.1303	32.0629	32.0507	32.0455	32.1822	32.4052	32.0704	32.0237		323.31	30789000000	454		tr|N0E3U0|N0E3U0_9MICO Alpha-1,4-glucan:maltose-1-phosphate maltosyltransferase OS=Tetrasphaera elongata Lp2 GN=pep1B PE=3 SV=1
	0.364067	-0.0985203	N0DXW3	27.8737	27.6865	27.502	27.6786	28.0096	27.5867	27.7183	27.8203		118.54	1511000000	50		tr|N0DXW3|N0DXW3_9MICO Deoxyribose-phosphate aldolase OS=Tetrasphaera elongata Lp2 GN=BN10_1190009 PE=4 SV=1
	0.069249	-0.0992293	N0E179	23.6175	24.5378	23.4798	23.3752	24.328	23.2368	23.0061	24.8363		4.3832	58772000	5		tr|N0E179|N0E179_9MICO Putative peptide ABC transporter, permease component OS=Tetrasphaera elongata Lp2 GN=BN10_1730017 PE=3 SV=1
	0.389375	-0.0998282	N0E2M3	27.7054	27.9917	28.2148	27.8749	27.9774	28.0451	28.0245	28.139		173.64	1968300000	57		tr|N0E2M3|N0E2M3_9MICO Uncharacterized protein OS=Tetrasphaera elongata Lp2 GN=BN10_470020 PE=4 SV=1
	1.13524	-0.101457	N0DXG1	29.4954	29.5687	29.3892	29.5571	29.6697	29.5951	29.5718	29.5796		268.71	5429200000	137		tr|N0DXG1|N0DXG1_9MICO Glucose-1-phosphate adenylyltransferase OS=Tetrasphaera elongata Lp2 GN=glgC PE=3 SV=1
	0.0839725	-0.101842	N0DZ44	26.1596	24.5475	25.56	24.5856	25.4908	25.4416	25.5912	24.7365		12.393	343560000	14		tr|N0DZ44|N0DZ44_9MICO Nicotinic acid mononucleotide adenyltransferase (Modular protein) OS=Tetrasphaera elongata Lp2 GN=BN10_310005 PE=4 SV=1
	0.36862	-0.101944	N0E0W1	28.1033	28.081	27.8893	28.312	28.2631	28.2357	28.3372	27.9574		96.706	2032200000	57		tr|N0E0W1|N0E0W1_9MICO SsrA-binding protein OS=Tetrasphaera elongata Lp2 GN=smpB PE=3 SV=1
	1.22378	-0.102246	N0DYV3	28.8369	28.7858	28.8345	28.8338	28.8191	28.9062	29.0206	28.954		150.34	3421500000	90		tr|N0DYV3|N0DYV3_9MICO UDP-N-acetylmuramoyl-tripeptide--D-alanyl-D-alanine ligase OS=Tetrasphaera elongata Lp2 GN=murF PE=3 SV=1
	0.293984	-0.102296	N0E2Q5	25.6596	25.7641	25.5515	25.2065	25.6159	25.5816	25.5125	25.881		40.032	380340000	18		tr|N0E2Q5|N0E2Q5_9MICO Uncharacterized protein OS=Tetrasphaera elongata Lp2 GN=BN10_480019 PE=4 SV=1
	0.469235	-0.103281	N0DZM1	31.9059	32.0774	32.1133	32.0576	32.3981	32.1172	32.0074	32.0446		323.31	31159000000	504		tr|N0DZM1|N0DZM1_9MICO Inositol-3-phosphate synthase OS=Tetrasphaera elongata Lp2 GN=ino PE=4 SV=1
	0.433924	-0.103327	N0DZM8	28.9919	29.1044	28.9491	28.9837	29.0486	28.8845	29.3671	29.1421		227.62	3811200000	113		tr|N0DZM8|N0DZM8_9MICO Single-stranded DNA-binding protein OS=Tetrasphaera elongata Lp2 GN=ssb PE=3 SV=1
	0.452802	-0.105603	N0E6C8	33.3306	33.5163	33.0559	33.4573	33.4215	33.4664	33.3966	33.498		323.31	76902000000	806		tr|N0E6C8|N0E6C8_9MICO 3-oxoacyl-[acyl-carrier-protein] synthase 2 OS=Tetrasphaera elongata Lp2 GN=fabF PE=3 SV=1
	0.3925	-0.105697	N0DXZ2	28.7013	28.5478	28.9538	28.7757	28.6188	29.0058	28.8646	28.9123		289.03	3148700000	95		tr|N0DXZ2|N0DXZ2_9MICO Methionine aminopeptidase OS=Tetrasphaera elongata Lp2 GN=map PE=3 SV=1
	0.255886	-0.105867	N0E016	25.3541	25.4551	25.3629	25.388	25.8061	25.6377	25.5139	25.0258		10.222	324100000	16		tr|N0E016|N0E016_9MICO 4a-hydroxytetrahydrobiopterin dehydratase OS=Tetrasphaera elongata Lp2 GN=BN10_130029 PE=4 SV=1
	0.329258	-0.106817	N0DXG5	28.275	28.0308	27.8778	27.8683	28.2757	28.2471	28.1195	27.8368		21.946	1889500000	14		tr|N0DXG5|N0DXG5_9MICO Uncharacterized protein OS=Tetrasphaera elongata Lp2 GN=BN10_1100002 PE=4 SV=1
	0.557407	-0.107585	N0DXF1	27.0623	26.9371	26.8454	26.9337	27.03	26.8429	27.2015	27.1344		32.763	934600000	27		tr|N0DXF1|N0DXF1_9MICO Putative beta-lactamase OS=Tetrasphaera elongata Lp2 GN=BN10_1070033 PE=4 SV=1
	0.332003	-0.108921	N0E0C9	26.1297	25.7233	26.2352	25.942	26.255	26.1998	26.1319	25.879		50.876	549130000	50		tr|N0E0C9|N0E0C9_9MICO ATP-dependent dethiobiotin synthetase BioD OS=Tetrasphaera elongata Lp2 GN=bioD PE=3 SV=1
	0.288619	-0.109706	N0E334	26.7612	26.3577	26.7295	26.4925	26.5562	27.0232	26.4517	26.7486		62.96	787230000	53		tr|N0E334|N0E334_9MICO Rhamnan synthesis F OS=Tetrasphaera elongata Lp2 GN=BN10_520082 PE=4 SV=1
	0.395591	-0.110729	N0E3T3	28.0311	28.327	28.0993	28.401	28.5411	28.2407	28.1492	28.3702		61.432	2272400000	54		tr|N0E3T3|N0E3T3_9MICO Deoxyuridine 5-triphosphate nucleotidohydrolase OS=Tetrasphaera elongata Lp2 GN=dut PE=3 SV=1
	0.225755	-0.110781	N0E4H6	24.6947	25.26	25.2987	25.4086	25.5419	25.3382	24.9877	25.2373		35.724	280910000	23		tr|N0E4H6|N0E4H6_9MICO Putative aminotransferase OS=Tetrasphaera elongata Lp2 GN=epsN PE=3 SV=1
	0.589142	-0.111996	N0E4L1	25.6408	25.4199	25.3603	25.4097	25.4045	25.7181	25.5799	25.5761		54.773	322230000	22		tr|N0E4L1|N0E4L1_9MICO Thymidylate synthase OS=Tetrasphaera elongata Lp2 GN=thyB PE=3 SV=1
	0.602198	-0.112928	N0E1H0	26.6753	26.4328	26.695	26.8572	26.7525	26.757	26.8135	26.789		86.936	795440000	46		tr|N0E1H0|N0E1H0_9MICO GTPase HflX OS=Tetrasphaera elongata Lp2 GN=hflX PE=3 SV=1
	0.339808	-0.113256	N0E175	26.7204	26.7524	26.73	26.383	26.5398	26.6392	26.8072	27.0526		89.724	703400000	48		tr|N0E175|N0E175_9MICO Putative protease OS=Tetrasphaera elongata Lp2 GN=BN10_1730012 PE=3 SV=1
	0.302052	-0.11431	N0E173	24.8893	24.8507	25.4384	24.9814	25.1764	25.3214	25.1933	24.926		17.551	245820000	19		tr|N0E173|N0E173_9MICO Putative protease OS=Tetrasphaera elongata Lp2 GN=BN10_620003 PE=4 SV=1
	0.197592	-0.11503	N0E442	26.4012	26.8633	25.8996	26.1377	26.693	26.2684	26.2876	26.5128		34.513	608660000	30		tr|N0E442|N0E442_9MICO Dioxygenase OS=Tetrasphaera elongata Lp2 GN=BN10_600013 PE=4 SV=1
	0.225217	-0.115168	N0E2W0	25.2406	25.4516	24.7104	25.2508	25.5085	25.2848	24.9116	25.4091		37.778	279440000	15		tr|N0E2W0|N0E2W0_9MICO D-inositol-3-phosphate glycosyltransferase OS=Tetrasphaera elongata Lp2 GN=mshA PE=3 SV=1
	0.376139	-0.115254	N0E1N3	26.6946	26.709	27.1365	26.6524	26.9942	27.0533	26.738	26.868		168.17	931280000	53		tr|N0E1N3|N0E1N3_9MICO Putative enoyl-CoA hydratase echA6 OS=Tetrasphaera elongata Lp2 GN=BN10_680003 PE=4 SV=1
	0.30238	-0.115582	N0E0J6	26.5861	27.121	26.795	26.7596	27.1839	26.6964	26.7798	27.0638		94.852	909200000	26		tr|N0E0J6|N0E0J6_9MICO Uncharacterized protein OS=Tetrasphaera elongata Lp2 GN=BN10_590015 PE=4 SV=1
	0.357691	-0.115664	N0DXY9	27.7642	27.4516	27.6343	27.7351	28.1177	27.6943	27.6421	27.5938		89.309	1567000000	45		tr|N0DXY9|N0DXY9_9MICO Uncharacterized protein OS=Tetrasphaera elongata Lp2 GN=BN10_1230005 PE=4 SV=1
	0.56329	-0.115848	N0E0S0	27.0238	27.222	27.1654	27.0289	27.2911	27.4056	27.1888	27.018		99.41	1092100000	48		tr|N0E0S0|N0E0S0_9MICO 3-ketoacyl-(Acyl-carrier-protein) reductase OS=Tetrasphaera elongata Lp2 GN=fabG PE=3 SV=1
	0.90449	-0.116221	N0DZJ4	31.3681	31.4079	31.2875	31.3148	31.3204	31.5885	31.412	31.5223		323.31	18873000000	391		tr|N0DZJ4|N0DZJ4_9MICO Aspartyl-tRNA synthetase OS=Tetrasphaera elongata Lp2 GN=aspS PE=3 SV=1
	0.603463	-0.116709	N0DYQ1	30.3645	30.2276	30.0032	30.1419	30.4414	30.3073	30.2061	30.2492		323.31	8667800000	241		tr|N0DYQ1|N0DYQ1_9MICO Extracellular solute-binding protein family 1 OS=Tetrasphaera elongata Lp2 GN=BN10_10017 PE=4 SV=1
	0.66571	-0.119612	N0E1I5	30.6043	30.715	30.5668	30.6625	30.8292	30.5236	30.7894	30.8848		323.31	12066000000	271		tr|N0E1I5|N0E1I5_9MICO Uncharacterized protein OS=Tetrasphaera elongata Lp2 GN=BN10_30005 PE=4 SV=1
	0.335115	-0.120212	N0DXL6	27.2464	27.7668	27.8859	27.7028	27.779	27.7789	27.9143	27.6106		194.37	1479200000	47		tr|N0DXL6|N0DXL6_9MICO Arginine biosynthesis bifunctional protein ArgJ OS=Tetrasphaera elongata Lp2 GN=argJ PE=3 SV=1
	0.719644	-0.120258	N0E2A1	28.6508	28.3648	28.586	28.3324	28.6449	28.555	28.5957	28.6194		109.37	2770000000	74		tr|N0E2A1|N0E2A1_9MICO Putative transcriptional regulatory protein OS=Tetrasphaera elongata Lp2 GN=BN10_360042 PE=4 SV=1
	0.280216	-0.12108	N0E1B4	27.918	27.8995	27.4048	27.8397	27.5029	28.0919	27.9337	28.0177		71.39	1627400000	51		tr|N0E1B4|N0E1B4_9MICO Putative Peroxiredoxin OS=Tetrasphaera elongata Lp2 GN=BN10_20009 PE=4 SV=1
	0.373426	-0.122592	N0DYV2	27.8915	28.294	28.0243	27.9545	28.405	27.8697	28.2354	28.1445		122.73	2113400000	48		tr|N0DYV2|N0DYV2_9MICO Phenylalanine--tRNA ligase alpha subunit OS=Tetrasphaera elongata Lp2 GN=pheS PE=3 SV=1
	0.429711	-0.123886	N0E230	27.0289	27.2367	27.3106	26.9906	27.0098	27.5087	27.2689	27.275		182.55	1002400000	44		tr|N0E230|N0E230_9MICO Putative threonine aldolase (LtaE) OS=Tetrasphaera elongata Lp2 GN=BN10_360038 PE=4 SV=1
	0.260906	-0.124691	N0DYA7	25.6803	26.0989	25.9053	25.8182	25.7134	26.4432	25.7239	26.121		42.095	463030000	26		tr|N0DYA7|N0DYA7_9MICO Putative enzyme OS=Tetrasphaera elongata Lp2 GN=BN10_1590020 PE=4 SV=1
	0.48481	-0.126539	N0E202	33.2395	32.9037	33.3674	32.9964	33.2975	33.1012	33.3284	33.286		323.31	66640000000	797		tr|N0E202|N0E202_9MICO Putative lipoprotein OS=Tetrasphaera elongata Lp2 GN=BN10_710008 PE=4 SV=1
	0.848052	-0.126901	N0E129	29.5834	29.7343	29.8054	29.7695	29.7557	30.0124	29.7888	29.8433		323.31	6085200000	126		tr|N0E129|N0E129_9MICO Transaldolase OS=Tetrasphaera elongata Lp2 GN=tal PE=3 SV=1
	0.480645	-0.127179	N0E435	27.1803	27.5272	27.03	27.4362	27.3158	27.4432	27.4859	27.4375		53.644	1120200000	48		tr|N0E435|N0E435_9MICO Aldo-keto reductase OS=Tetrasphaera elongata Lp2 GN=yghZ PE=4 SV=1
	1.57	-0.12767	N0E5M8	29.0731	28.94	28.9549	29.0665	29.1798	29.1808	29.1025	29.082		301.98	3838900000	134		tr|N0E5M8|N0E5M8_9MICO Pseudouridine-5-phosphate glycosidase OS=Tetrasphaera elongata Lp2 GN=yeiN PE=3 SV=1
	1.21376	-0.128778	N0DZA3	32.8483	32.9334	32.8903	32.9934	32.9465	33.1353	32.9854	33.1133		323.31	58623000000	792		tr|N0DZA3|N0DZA3_9MICO Succinyl-CoA ligase [ADP-forming] subunit alpha OS=Tetrasphaera elongata Lp2 GN=sucD PE=3 SV=1
	0.650476	-0.12921	N0E2C8	33.6694	33.477	33.4981	33.6065	33.8815	33.7827	33.5684	33.5352		323.31	91499000000	899		tr|N0E2C8|N0E2C8_9MICO 50S ribosomal protein L13 OS=Tetrasphaera elongata Lp2 GN=rplM PE=3 SV=1
	0.319269	-0.129227	N0E298	27.4237	27.2159	26.8993	27.0524	27.3574	26.8943	27.3941	27.4623		69.021	1093300000	32		tr|N0E298|N0E298_9MICO Putative pyrophosphohydrolase OS=Tetrasphaera elongata Lp2 GN=BN10_130048 PE=3 SV=1
	0.660317	-0.129362	N0DYG4	31.6708	31.8907	31.6347	31.687	31.7214	32.0459	31.885	31.7483		323.31	24717000000	430		tr|N0DYG4|N0DYG4_9MICO 50S ribosomal protein L19 OS=Tetrasphaera elongata Lp2 GN=rplS PE=3 SV=1
	0.689572	-0.13011	N0E377	28.7507	29.107	28.93	29.0385	28.9922	29.0669	29.0664	29.2211		113.7	3589100000	82		tr|N0E377|N0E377_9MICO Ribosome maturation factor RimM OS=Tetrasphaera elongata Lp2 GN=rimM PE=3 SV=1
	0.549814	-0.131059	N0DXS1	30.5365	30.1972	30.4932	30.2511	30.3183	30.5905	30.4599	30.6336		264.61	9900500000	204		tr|N0DXS1|N0DXS1_9MICO Translation initiation inhibitor OS=Tetrasphaera elongata Lp2 GN=BN10_1270006 PE=4 SV=1
	0.382599	-0.133625	N0DXF6	26.6455	26.852	27.2232	26.5787	26.983	27.0317	26.8203	26.9988		54.298	816090000	17		tr|N0DXF6|N0DXF6_9MICO Putative DNA-binding protein OS=Tetrasphaera elongata Lp2 GN=BN10_1080016 PE=4 SV=1
	1.61595	-0.135022	N0DZF9	30.1482	30.2216	30.1912	30.3004	30.3883	30.3945	30.3608	30.2579		323.31	8869900000	293		tr|N0DZF9|N0DZF9_9MICO Crotonyl CoA reductase OS=Tetrasphaera elongata Lp2 GN=BN10_1170017 PE=4 SV=1
	0.394031	-0.13532	N0E2J7	26.6899	27.2019	27.0161	27.332	27.2338	27.1938	27.0406	27.313		160.82	1216700000	53		tr|N0E2J7|N0E2J7_9MICO Quinone oxidoreductase 1 OS=Tetrasphaera elongata Lp2 GN=BN10_80004 PE=4 SV=1
	1.66463	-0.137076	N0E4Q4	30.3332	30.3962	30.3402	30.3771	30.6239	30.4676	30.452	30.4515		323.31	9798700000	172		tr|N0E4Q4|N0E4Q4_9MICO Thioredoxin reductase OS=Tetrasphaera elongata Lp2 GN=trxB PE=3 SV=1
	0.143944	-0.137651	N0E3I6	25.1384	24.6967	25.0608	24.54	24.3507	25.9295	24.7857	24.9207		18.043	199340000	13		tr|N0E3I6|N0E3I6_9MICO Protein-tyrosine phosphatase, low molecular weight OS=Tetrasphaera elongata Lp2 GN=BN10_540024 PE=4 SV=1
	0.733543	-0.138485	N0E3T6	31.5719	31.4544	31.3585	31.4298	31.4149	31.7595	31.4985	31.6957		323.31	20641000000	369		tr|N0E3T6|N0E3T6_9MICO Phosphoglucomutase OS=Tetrasphaera elongata Lp2 GN=pgm PE=3 SV=1
	0.546758	-0.138562	N0E0R4	31.9442	31.8088	31.6583	31.7766	31.9718	32.2005	31.8489	31.7211		266	27773000000	285		tr|N0E0R4|N0E0R4_9MICO 30S ribosomal protein S16 OS=Tetrasphaera elongata Lp2 GN=rpsP PE=3 SV=1
	1.07816	-0.139054	N0E1K7	30.7804	30.5687	30.6131	30.6503	30.7261	30.9159	30.7013	30.8253		323.31	12230000000	228		tr|N0E1K7|N0E1K7_9MICO Putative methylmalonyl-CoA epimerase (MCEE) OS=Tetrasphaera elongata Lp2 GN=BN10_1170015 PE=4 SV=1
	1.03545	-0.141405	N0E0B9	28.0961	28.2748	27.9347	28.1409	28.2701	28.2347	28.2441	28.2632		143.06	2066300000	58		tr|N0E0B9|N0E0B9_9MICO Cysteine desulfurase involved in tRNA thiolation OS=Tetrasphaera elongata Lp2 GN=iscSA PE=4 SV=1
	0.617986	-0.142182	N0E1K8	28.9354	28.6542	28.6811	28.5513	28.6952	29.0454	28.8185	28.8316		184.57	3181200000	91		tr|N0E1K8|N0E1K8_9MICO Phosphoribosylamine--glycine ligase OS=Tetrasphaera elongata Lp2 GN=purD PE=3 SV=1
	0.34959	-0.142977	N0E4G4	25.5296	25.4768	25.1683	24.931	25.7224	25.2386	25.401	25.3155		41.028	309920000	21		tr|N0E4G4|N0E4G4_9MICO UDP-N-acetylglucosamine 1-carboxyvinyltransferase OS=Tetrasphaera elongata Lp2 GN=murA PE=4 SV=1
	0.274182	-0.1432	N0E3P2	25.0906	25.1116	25.0034	25.5932	25.0103	25.8123	25.3303	25.2186		36.244	281810000	26		tr|N0E3P2|N0E3P2_9MICO Uncharacterized protein OS=Tetrasphaera elongata Lp2 GN=BN10_980007 PE=4 SV=1
	1.00587	-0.143916	N0DYM4	30.3349	30.2965	30.1996	30.2397	30.355	30.6065	30.2996	30.3852		323.31	8998800000	237		tr|N0DYM4|N0DYM4_9MICO Lysine--tRNA ligase OS=Tetrasphaera elongata Lp2 GN=lysS PE=3 SV=1
	0.404686	-0.144485	N0E687	26.6342	26.7879	26.2632	26.968	26.7593	26.9512	26.773	26.7478		54.826	727450000	39		tr|N0E687|N0E687_9MICO Chaperone protein dnaJ 1 OS=Tetrasphaera elongata Lp2 GN=dnaJ PE=4 SV=1
	1.73343	-0.144659	N0E562	29.5528	29.6049	29.5121	29.5147	29.7765	29.6214	29.7396	29.6256		323.31	5651200000	147		tr|N0E562|N0E562_9MICO Peptide methionine sulfoxide reductase msrB OS=Tetrasphaera elongata Lp2 GN=msrB PE=4 SV=1
	1.30191	-0.144667	N0DXW4	33.7842	33.7009	33.6718	33.7482	33.7532	33.9805	33.8096	33.9404		323.31	98674000000	1121		tr|N0DXW4|N0DXW4_9MICO Catalase-peroxidase OS=Tetrasphaera elongata Lp2 GN=katG PE=3 SV=1
	0.417445	-0.144674	N0DZL6	26.6602	27.1804	27.1267	27.2863	27.3841	27.1982	27.1884	27.0617		59.781	1047400000	29		tr|N0DZL6|N0DZL6_9MICO Uncharacterized protein OS=Tetrasphaera elongata Lp2 GN=BN10_500024 PE=4 SV=1
	0.544405	-0.145046	N0DYN8	28.3522	27.9937	28.4296	28.3306	28.618	28.4633	28.3404	28.2645		152.66	2532100000	67		tr|N0DYN8|N0DYN8_9MICO Putative carbohydrate ABC transporter (ATP-binding protein) OS=Tetrasphaera elongata Lp2 GN=yufO PE=3 SV=1
	1.73637	-0.146387	N0DXF7	31.5721	31.4136	31.4893	31.5483	31.5781	31.6963	31.6995	31.6348		323.31	21741000000	405		tr|N0DXF7|N0DXF7_9MICO Cysteine desulfurase OS=Tetrasphaera elongata Lp2 GN=sufS PE=4 SV=1
	0.395309	-0.147805	N0E0Q0	25.676	25.4836	25.8182	25.9873	25.7419	26.1714	25.6272	26.0159		28.361	425460000	22		tr|N0E0Q0|N0E0Q0_9MICO Putative ATP/GTP-binding protein OS=Tetrasphaera elongata Lp2 GN=BN10_1540001 PE=4 SV=1
	0.445699	-0.148867	N0E0Z8	28.7812	28.6689	28.9275	28.6861	28.5254	29.1682	29.0111	28.9545		292.25	3296100000	119		tr|N0E0Z8|N0E0Z8_9MICO 1-deoxy-D-xylulose 5-phosphate reductoisomerase OS=Tetrasphaera elongata Lp2 GN=dxr PE=3 SV=1
	0.704687	-0.150043	N0E4X3	26.0744	26.1691	26.2878	26.1408	26.5107	26.2636	26.415	26.083		66.641	521020000	44		tr|N0E4X3|N0E4X3_9MICO Putative secreted protein OS=Tetrasphaera elongata Lp2 GN=BN10_520040 PE=4 SV=1
	0.776774	-0.150532	N0E1L8	27.5932	27.4628	27.6083	27.5195	27.8897	27.4572	27.7396	27.6995		57.996	1401700000	38		tr|N0E1L8|N0E1L8_9MICO Uncharacterized protein OS=Tetrasphaera elongata Lp2 GN=BN10_1180004 PE=4 SV=1
	0.942943	-0.150862	N0DZ29	29.5721	29.788	29.8099	29.6801	29.8763	30.028	29.7528	29.7964		323.31	6385100000	173		tr|N0DZ29|N0DZ29_9MICO Putative ferredoxin reductase OS=Tetrasphaera elongata Lp2 GN=BN10_300078 PE=4 SV=1
	0.356151	-0.151085	N0E591	25.4937	25.8402	25.6583	25.8079	25.6672	26.2536	25.5114	25.9722		72.872	353120000	15		tr|N0E591|N0E591_9MICO Uncharacterized protein OS=Tetrasphaera elongata Lp2 GN=BN10_560067 PE=4 SV=1
	0.441797	-0.151657	N0E5L9	27.7242	28.1609	28.2552	28.4109	28.3077	28.406	28.2283	28.2158		142.85	2056100000	76		tr|N0E5L9|N0E5L9_9MICO Putative 3-ketoacyl-CoA thiolase (Beta-ketothiolase) or Acetoacetyl-CoA thiolase OS=Tetrasphaera elongata Lp2 GN=BN10_590081 PE=3 SV=1
	0.753125	-0.152356	N0DXI8	29.4862	29.6034	29.4236	29.8481	29.7964	29.6543	29.7268	29.7932		274.31	5677800000	179		tr|N0DXI8|N0DXI8_9MICO Transcription termination factor Rho OS=Tetrasphaera elongata Lp2 GN=rho PE=3 SV=1
	0.89009	-0.153389	N0DZF2	27.5727	27.6542	27.5791	27.7348	27.9612	27.8184	27.5811	27.7936		76.574	1498900000	41		tr|N0DZF2|N0DZF2_9MICO Ribosome maturation factor RimP OS=Tetrasphaera elongata Lp2 GN=rimP PE=3 SV=1
	0.282783	-0.154576	N0E296	27.1057	27.4381	26.8589	27.2592	26.8488	27.1718	27.5968	27.6627		93.237	1149200000	33		tr|N0E296|N0E296_9MICO Uncharacterized protein OS=Tetrasphaera elongata Lp2 GN=BN10_780005 PE=4 SV=1
	1.15189	-0.155007	N0E5F7	31.5475	31.8145	31.6077	31.7433	31.7786	31.9269	31.7792	31.8483		323.31	25100000000	719		tr|N0E5F7|N0E5F7_9MICO Glutamate synthase (Large subunit) OS=Tetrasphaera elongata Lp2 GN=gltA PE=4 SV=1
	0.882566	-0.155098	N0E508	27.8392	28.0442	27.8827	27.8893	28.0412	28.2228	27.8681	28.1436		131.73	1858400000	72		tr|N0E508|N0E508_9MICO Malto-oligosyltrehalose trehalohydrolase OS=Tetrasphaera elongata Lp2 GN=treZ PE=3 SV=1
	1.11705	-0.155145	N0DZF3	28.01	28.1321	28.1157	28.2119	28.2584	28.2275	28.1634	28.441		78.932	2230800000	52		tr|N0DZF3|N0DZF3_9MICO Uncharacterized protein OS=Tetrasphaera elongata Lp2 GN=BN10_1170002 PE=4 SV=1
	0.216622	-0.155616	N0DZL2	26.8963	25.8836	26.8602	26.4009	26.5473	26.6141	26.3759	27.1261		35.958	735850000	24		tr|N0DZL2|N0DZL2_9MICO Protein meaA OS=Tetrasphaera elongata Lp2 GN=meaA PE=4 SV=1
	0.494524	-0.155622	N0E1P4	29.1826	29.126	29.1212	29.1436	29.0299	29.6378	29.0973	29.4308		323.31	4298300000	147		tr|N0E1P4|N0E1P4_9MICO Uncharacterized protein OS=Tetrasphaera elongata Lp2 GN=BN10_690022 PE=4 SV=1
	1.37503	-0.156091	N0E4E6	28.5411	28.4982	28.4993	28.5193	28.5695	28.6078	28.6649	28.8401		173.34	2776100000	96		tr|N0E4E6|N0E4E6_9MICO Uncharacterized protein OS=Tetrasphaera elongata Lp2 GN=BN10_650008 PE=4 SV=1
	0.284881	-0.156946	N0E0T5	25.7037	25.9321	25.9899	25.8973	26.6163	25.5424	26.0099	25.9823		23.523	483700000	19		tr|N0E0T5|N0E0T5_9MICO N-acetyl-gamma-glutamyl-phosphate reductase OS=Tetrasphaera elongata Lp2 GN=argC PE=3 SV=1
	0.392705	-0.158226	N0E012	27.7639	27.9221	27.9462	27.7492	28.3398	27.5552	27.9548	28.1645		97.919	1684700000	65		tr|N0E012|N0E012_9MICO Oligopeptide/dipeptide ABC transporter,peptide-binding protein OS=Tetrasphaera elongata Lp2 GN=BN10_130024 PE=4 SV=1
	1.57482	-0.158361	N0E2S1	29.3723	29.4515	29.2673	29.4687	29.5851	29.6049	29.5243	29.479		283.04	4884800000	183		tr|N0E2S1|N0E2S1_9MICO Fused putative transporter subunits of ABC superfamily: ATP-binding components OS=Tetrasphaera elongata Lp2 GN=yjjK PE=3 SV=1
	1.09062	-0.159735	N0E2I1	27.7046	27.8583	27.8401	27.9027	27.9163	27.8734	28.1602	27.9946		173.96	1799200000	77		tr|N0E2I1|N0E2I1_9MICO M20/M25/M40 family peptidase OS=Tetrasphaera elongata Lp2 GN=BN10_470026 PE=4 SV=1
	1.38521	-0.15997	N0DZR1	29.8916	29.8816	30.0166	29.8776	29.9839	30.2257	30.0513	30.0465		323.31	7123800000	211		tr|N0DZR1|N0DZR1_9MICO Glutamate dehydrogenase OS=Tetrasphaera elongata Lp2 GN=gdhA PE=3 SV=1
	1.32329	-0.160043	N0E4H7	26.4163	26.453	26.6395	26.5953	26.7486	26.6259	26.7448	26.6249		93.903	675590000	34		tr|N0E4H7|N0E4H7_9MICO Putative Diacylglycerol O-acyltransferase OS=Tetrasphaera elongata Lp2 GN=BN10_650012 PE=4 SV=1
	0.885316	-0.161273	N0DZY0	26.6172	26.8764	27.0265	26.8387	26.936	26.9953	27.1038	26.9689		79.468	890200000	45		tr|N0DZY0|N0DZY0_9MICO Uncharacterized protein OS=Tetrasphaera elongata Lp2 GN=BN10_1270003 PE=4 SV=1
	0.917079	-0.161673	N0E144	27.4688	27.4286	27.3506	27.2362	27.3735	27.4828	27.5505	27.724		143.71	1314300000	46		tr|N0E144|N0E144_9MICO Uncharacterized protein OS=Tetrasphaera elongata Lp2 GN=BN10_610008 PE=4 SV=1
	0.792881	-0.162893	N0E2T3	27.4864	27.3127	27.5368	27.4402	27.8182	27.5784	27.6475	27.3835		126.88	1357400000	46		tr|N0E2T3|N0E2T3_9MICO S-adenosylmethionine-dependent methyltransferase OS=Tetrasphaera elongata Lp2 GN=BN10_140006 PE=4 SV=1
	0.814594	-0.165717	N0DZ33	27.1507	26.8109	27.2134	26.9035	27.2633	27.2046	27.123	27.1504		107.68	980180000	44		tr|N0DZ33|N0DZ33_9MICO Uncharacterized protein OS=Tetrasphaera elongata Lp2 GN=BN10_300088 PE=4 SV=1
	1.52698	-0.166612	N0E4Y7	30.5366	30.4613	30.5783	30.51	30.546	30.687	30.7168	30.8029		323.31	11224000000	260		tr|N0E4Y7|N0E4Y7_9MICO Adenylate kinase OS=Tetrasphaera elongata Lp2 GN=adk PE=3 SV=1
	0.906173	-0.168377	N0E3I7	29.5843	29.4662	29.2859	29.397	29.6397	29.781	29.4584	29.5278		94.148	5190900000	84		tr|N0E3I7|N0E3I7_9MICO Ribosome-binding factor A OS=Tetrasphaera elongata Lp2 GN=rbfA PE=3 SV=1
	0.230624	-0.168465	N0DYD7	24.5371	24.8925	24.5026	24.3578	24.2911	25.4696	24.3633	24.84		23.724	196070000	14		tr|N0DYD7|N0DYD7_9MICO Uncharacterized protein OS=Tetrasphaera elongata Lp2 GN=BN10_1670003 PE=4 SV=1
	0.666734	-0.16848	N0E5U5	31.1788	30.8019	30.994	30.857	31.0816	31.365	30.9422	31.1169		250.12	14747000000	120		tr|N0E5U5|N0E5U5_9MICO DNA-directed RNA polymerase subunit omega OS=Tetrasphaera elongata Lp2 GN=rpoZ PE=3 SV=1
	0.651785	-0.169886	N0E5P6	26.4338	26.6843	26.8856	26.3438	26.8138	26.7714	26.712	26.7299		49.655	668440000	41		tr|N0E5P6|N0E5P6_9MICO Putative enzyme OS=Tetrasphaera elongata Lp2 GN=BN10_610025 PE=3 SV=1
	1.0331	-0.171038	N0E3S3	29.2463	29.0422	29.0719	29.0567	29.0917	29.4037	29.2362	29.3696		171.05	4116500000	86		tr|N0E3S3|N0E3S3_9MICO L-cysteine:1D-myo-inositol 2-amino-2-deoxy-alpha-D-glucopyranoside ligase OS=Tetrasphaera elongata Lp2 GN=mshC PE=3 SV=1
	1.40113	-0.171069	N0DZK6	26.1131	26.059	26.0388	26.0178	26.2667	26.382	26.1683	26.0959		46.241	500540000	24		tr|N0DZK6|N0DZK6_9MICO Putative magnesium or manganese-dependent protein phosphatase OS=Tetrasphaera elongata Lp2 GN=BN10_1200004 PE=4 SV=1
	0.70516	-0.171179	N0DZ70	27.4685	27.6685	27.5188	27.5409	27.4386	27.9446	27.6652	27.833		126.51	1432400000	42		tr|N0DZ70|N0DZ70_9MICO Anthranilate phosphoribosyltransferase OS=Tetrasphaera elongata Lp2 GN=trpD PE=3 SV=1
	1.16516	-0.172066	N0E0X8	28.7416	28.8588	28.7989	28.8254	29.0574	29.1415	28.8216	28.8924		128.91	3318300000	103		tr|N0E0X8|N0E0X8_9MICO Probable transcriptional regulatory protein yebC OS=Tetrasphaera elongata Lp2 GN=yebC PE=3 SV=1
	1.47632	-0.172233	N0E1I6	31.3821	31.498	31.6201	31.5806	31.7528	31.7404	31.6707	31.6057		323.31	22051000000	631		tr|N0E1I6|N0E1I6_9MICO Proline--tRNA ligase OS=Tetrasphaera elongata Lp2 GN=proS PE=3 SV=1
	0.428935	-0.173107	N0DXT6	27.1447	27.5023	26.9044	27.4079	27.6869	27.1662	27.2722	27.5263		102.89	1216300000	55		tr|N0DXT6|N0DXT6_9MICO Putative ABC transporter solute-binding protein OS=Tetrasphaera elongata Lp2 GN=BN10_130022 PE=4 SV=1
	0.424943	-0.174529	N0DYL2	26.8977	26.7617	27.195	27.4795	27.4529	27.0494	27.1912	27.3384		79.918	1141100000	36		tr|N0DYL2|N0DYL2_9MICO Oligopeptide ABC transporter (ATP-binding protein) OS=Tetrasphaera elongata Lp2 GN=appF PE=3 SV=1
	0.98749	-0.174656	N0E213	32.9062	32.798	32.861	32.9012	32.8829	33.2785	32.9423	33.0614		323.31	56671000000	1078		tr|N0E213|N0E213_9MICO Polyribonucleotide nucleotidyltransferase OS=Tetrasphaera elongata Lp2 GN=pnpA PE=3 SV=1
	0.361228	-0.174821	N0E2V3	26.4969	26.8274	26.0713	26.2907	26.6642	26.459	26.3238	26.9385		37.324	643820000	19		tr|N0E2V3|N0E2V3_9MICO Uncharacterized protein OS=Tetrasphaera elongata Lp2 GN=BN10_890002 PE=4 SV=1
	0.658629	-0.176795	N0DYQ6	31.5907	31.6033	31.3534	31.5467	31.3584	31.7692	31.8491	31.8246		323.31	22377000000	462		tr|N0DYQ6|N0DYQ6_9MICO Putative Butyryl-CoA dehydrogenase OS=Tetrasphaera elongata Lp2 GN=BN10_30013 PE=3 SV=1
	1.54618	-0.176899	N0E327	26.5235	26.748	26.7652	26.628	26.8833	26.8356	26.7764	26.877		131.48	791140000	37		tr|N0E327|N0E327_9MICO Tryptophan synthase alpha chain OS=Tetrasphaera elongata Lp2 GN=trpA PE=3 SV=1
	0.776168	-0.177232	N0DZ35	27.667	27.9487	27.7824	27.9603	27.8585	28.2164	27.8787	28.1138		176.96	1709800000	72		tr|N0DZ35|N0DZ35_9MICO Protein mrp homolog OS=Tetrasphaera elongata Lp2 GN=mrp PE=4 SV=1
	1.01678	-0.177891	N0DY59	31.3525	30.9686	31.2343	31.0747	31.3374	31.2486	31.3695	31.3862		323.31	17507000000	223		tr|N0DY59|N0DY59_9MICO Uncharacterized protein OS=Tetrasphaera elongata Lp2 GN=BN10_140025 PE=4 SV=1
	1.20695	-0.178021	N0DXN2	30.0088	30.0076	29.945	30.1153	30.3716	30.2112	30.1712	30.0349		221.37	7706200000	166		tr|N0DXN2|N0DXN2_9MICO Uncharacterized protein OS=Tetrasphaera elongata Lp2 GN=BN10_1070017 PE=3 SV=1
	0.475496	-0.178738	N0E3X7	26.9165	26.512	26.9493	26.3703	26.737	27.1203	26.8609	26.7448		116.57	769050000	28		tr|N0E3X7|N0E3X7_9MICO Uncharacterized protein OS=Tetrasphaera elongata Lp2 GN=BN10_580025 PE=4 SV=1
	0.807509	-0.179632	N0E137	27.798	27.689	27.8176	27.8628	28.2316	28.0417	27.7639	27.8488		109.54	1643400000	64		tr|N0E137|N0E137_9MICO 3-isopropylmalate dehydrogenase OS=Tetrasphaera elongata Lp2 GN=leuB PE=3 SV=1
	0.602783	-0.180815	N0DZ90	26.9226	26.7189	26.4099	26.5146	26.7157	26.7869	26.7145	27.0722		79.154	809270000	34		tr|N0DZ90|N0DZ90_9MICO Ribonuclease 3 OS=Tetrasphaera elongata Lp2 GN=rnc PE=3 SV=1
	0.56665	-0.18082	N0E593	27.5557	27.6293	27.1768	27.7783	27.8428	27.8542	27.5876	27.5787		128.53	1482200000	54		tr|N0E593|N0E593_9MICO Putative ABC transporter OS=Tetrasphaera elongata Lp2 GN=BN10_820011 PE=4 SV=1
	1.67749	-0.18186	N0E0H4	30.4056	30.4164	30.4801	30.4609	30.4601	30.7119	30.6727	30.6457		323.31	10697000000	311		tr|N0E0H4|N0E0H4_9MICO Putative Maltose alpha-D-glucosyltransferase OS=Tetrasphaera elongata Lp2 GN=BN10_570004 PE=4 SV=1
	0.55199	-0.181894	N0E4Y9	30.2215	30.2519	30.0056	30.0267	30.1935	30.7218	30.205	30.1128		155.41	7271100000	78		tr|N0E4Y9|N0E4Y9_9MICO Uncharacterized protein OS=Tetrasphaera elongata Lp2 GN=BN10_760008 PE=4 SV=1
	0.875053	-0.184477	N0DZ52	28.956	29.3422	29.1391	29.2831	29.4818	29.4069	29.3813	29.1885		219.67	4426500000	127		tr|N0DZ52|N0DZ52_9MICO D-alanine--D-alanine ligase OS=Tetrasphaera elongata Lp2 GN=ddl PE=3 SV=1
	0.896594	-0.184836	N0DYX1	28.0734	28.2404	27.9276	28.1542	28.3484	28.4805	28.1687	28.1373		36.804	1932600000	23		tr|N0DYX1|N0DYX1_9MICO Type I restriction modification enzyme protein S OS=Tetrasphaera elongata Lp2 GN=hsdS PE=4 SV=1
	0.883496	-0.185534	N0E662	33.1359	33.245	33.0284	33.2595	33.395	33.5897	33.1727	33.2538		323.31	67848000000	564		tr|N0E662|N0E662_9MICO 30S ribosomal protein S5 OS=Tetrasphaera elongata Lp2 GN=BN10_760007 PE=4 SV=1
	0.701602	-0.186282	N0E060	27.3382	27.3238	27.5987	27.441	27.9463	27.5386	27.4808	27.4812		95.96	1298900000	65		tr|N0E060|N0E060_9MICO Glutamate-1-semialdehyde 2,1-aminomutase (GSA) (Glutamate-1-semialdehyde aminotransferase)(GSA-AT) OS=Tetrasphaera elongata Lp2 GN=hemL PE=3 SV=1
	0.705414	-0.187446	N0DZ42	28.9247	29.2511	29.249	29.4951	29.4052	29.2692	29.5201	29.4753		310.35	4570000000	129		tr|N0DZ42|N0DZ42_9MICO L-carnitine dehydratase/bile acid-inducible protein F OS=Tetrasphaera elongata Lp2 GN=BN10_430004 PE=4 SV=1
	1.46399	-0.189593	N0DZW2	29.0578	29.2068	28.9948	29.2135	29.3278	29.3698	29.1813	29.3523		217.61	4038300000	127		tr|N0DZW2|N0DZW2_9MICO Uncharacterized protein OS=Tetrasphaera elongata Lp2 GN=BN10_130015 PE=3 SV=1
	1.65137	-0.192393	N0E432	32.0579	32.0802	31.9847	32.0037	32.1204	32.1265	32.3474	32.3018		323.31	31196000000	494		tr|N0E432|N0E432_9MICO Putative Ornithine aminotransferase (RocD) OS=Tetrasphaera elongata Lp2 GN=BN10_300020 PE=3 SV=1
	1.57877	-0.193294	N0E4A6	29.3874	29.5782	29.322	29.4755	29.5961	29.7291	29.5656	29.6454		323.31	5263000000	143		tr|N0E4A6|N0E4A6_9MICO Adenosine kinase OS=Tetrasphaera elongata Lp2 GN=adoK PE=4 SV=1
	0.970163	-0.193522	N0E546	26.8507	26.4912	26.6099	26.5108	26.9259	26.6518	26.7827	26.8762		90.031	730770000	43		tr|N0E546|N0E546_9MICO Uncharacterized protein OS=Tetrasphaera elongata Lp2 GN=BN10_800014 PE=4 SV=1
	0.864396	-0.193583	N0DY62	28.5259	28.962	28.7355	28.8749	28.899	29.1438	28.8794	28.9505		93.616	3466800000	90		tr|N0DY62|N0DY62_9MICO Uncharacterized protein OS=Tetrasphaera elongata Lp2 GN=BN10_140035 PE=4 SV=1
	0.641068	-0.194132	N0E353	25.2271	25.484	25.613	25.3065	25.6452	25.4542	25.9104	25.3973		30.988	340650000	35		tr|N0E353|N0E353_9MICO Tyrosine protein kinase:Serine/threonine protein kinase:PASTA OS=Tetrasphaera elongata Lp2 GN=BN10_150002 PE=4 SV=1
	1.15828	-0.194913	N0E3A7	27.584	27.9055	27.9068	27.8693	28.0308	28.0596	27.8889	28.0661		152.49	1779200000	65		tr|N0E3A7|N0E3A7_9MICO Uncharacterized protein OS=Tetrasphaera elongata Lp2 GN=BN10_920002 PE=4 SV=1
	0.428918	-0.195253	N0E3Y5	25.8297	25.4779	25.9841	25.2399	25.8547	26.0378	25.5105	25.9096		22.916	399790000	22		tr|N0E3Y5|N0E3Y5_9MICO Uncharacterized protein OS=Tetrasphaera elongata Lp2 GN=BN10_590043 PE=4 SV=1
	0.610266	-0.195525	N0E4I4	27.3457	27.2468	27.2159	27.3977	27.438	27.135	27.5813	27.8339		139.43	1218200000	50		tr|N0E4I4|N0E4I4_9MICO Dipeptidase 1 OS=Tetrasphaera elongata Lp2 GN=Dpep PE=4 SV=1
	0.544481	-0.196717	N0E2C9	24.7319	24.7843	24.9492	24.3796	25.1847	24.6672	24.767	25.013		38.376	203660000	15		tr|N0E2C9|N0E2C9_9MICO Putative two-component system response regulator OS=Tetrasphaera elongata Lp2 GN=BN10_460037 PE=4 SV=1
	0.356527	-0.198203	N0DYQ4	24.6285	24.7738	25.2407	24.9265	25.0875	25.4718	24.5363	25.2666		20.103	250750000	10		tr|N0DYQ4|N0DYQ4_9MICO 1-acylglycerol-3-phosphate O-acyltransferase OS=Tetrasphaera elongata Lp2 GN=BN10_1000007 PE=4 SV=1
	0.428397	-0.198577	N0DZI2	25.7296	25.9484	25.4091	26.2391	26.1601	26.263	25.7985	25.8989		21.612	425500000	15		tr|N0DZI2|N0DZI2_9MICO Cytochrome bd ubiquinol oxidase (Subunit I) OS=Tetrasphaera elongata Lp2 GN=cydA PE=4 SV=1
	0.913515	-0.19873	N0DXR5	27.1376	27.1301	27.0282	27.442	27.3372	27.5767	27.3151	27.3038		114.5	1098700000	50		tr|N0DXR5|N0DXR5_9MICO Putative mutator mutT1 protein OS=Tetrasphaera elongata Lp2 GN=mutT PE=3 SV=1
	1.40961	-0.198732	N0E3U6	27.3292	27.4375	27.356	27.2147	27.6542	27.6004	27.3842	27.4934		122.19	1209000000	75		tr|N0E3U6|N0E3U6_9MICO Putative chromosome condensation protein OS=Tetrasphaera elongata Lp2 GN=BN10_570017 PE=3 SV=1
	1.21585	-0.200514	N0E2S3	31.4829	31.5912	31.636	31.5981	32.0129	31.6654	31.6812	31.7508		220.45	23157000000	329		tr|N0E2S3|N0E2S3_9MICO Thioredoxin OS=Tetrasphaera elongata Lp2 GN=trxA PE=3 SV=1
	0.787407	-0.20098	N0DZ24	29.8629	29.4215	29.4549	29.4252	29.9394	29.6995	29.6482	29.6813		136.15	5661800000	77		tr|N0DZ24|N0DZ24_9MICO Uncharacterized protein OS=Tetrasphaera elongata Lp2 GN=BN10_40009 PE=4 SV=1
	0.179157	-0.201099	N0DZR2	23.9865	25.1042	24.3087	24.3003	24.958	23.6276	24.5814	25.3371		56.983	133500000	13		tr|N0DZR2|N0DZR2_9MICO Uncharacterized protein OS=Tetrasphaera elongata Lp2 GN=BN10_50009 PE=4 SV=1
	0.227713	-0.201241	N0E0I2	24.361	23.1762	24.6843	24.2197	24.6715	24.1955	24.0057	24.3736		13.198	176450000	7		tr|N0E0I2|N0E0I2_9MICO Putative ABC transporter ATP-binding protein OS=Tetrasphaera elongata Lp2 GN=BN10_1390017 PE=4 SV=1
	0.772192	-0.202516	N0E4J0	25.5031	26.0077	25.6776	25.5881	25.9582	25.9524	25.9816	25.6944		17.32	465880000	18		tr|N0E4J0|N0E4J0_9MICO Nod factor export ATP-binding protein I OS=Tetrasphaera elongata Lp2 GN=nodI PE=3 SV=1
	1.37686	-0.202598	N0E677	31.1809	31.0308	31.0748	31.1288	31.2471	31.5177	31.2605	31.2005		323.31	16137000000	373		tr|N0E677|N0E677_9MICO Inosine-5-monophosphate dehydrogenase OS=Tetrasphaera elongata Lp2 GN=guaB PE=3 SV=1
	0.103375	-0.203512	N0E1V0	25.378	25.6499	25.8606	22.9722	24.4153	25.1659	25.4249	25.6687		36.203	332410000	16		tr|N0E1V0|N0E1V0_9MICO Uncharacterized protein OS=Tetrasphaera elongata Lp2 GN=BN10_720022 PE=4 SV=1
	0.498321	-0.204247	N0DZE7	27.4076	27.8109	27.1718	27.5627	27.5288	27.8341	27.4226	27.9843		105.05	1366700000	55		tr|N0DZE7|N0DZE7_9MICO Hydrolase OS=Tetrasphaera elongata Lp2 GN=BN10_1150004 PE=4 SV=1
	0.609274	-0.204356	N0E670	34.8742	35.0545	34.616	35.0593	35.2423	35.3292	35.0639	34.7861		323.31	227480000000	1376		tr|N0E670|N0E670_9MICO 50S ribosomal protein L2 OS=Tetrasphaera elongata Lp2 GN=rplB PE=3 SV=1
	1.25049	-0.204704	N0E337	30.7864	30.7791	30.755	30.7689	30.8009	31.1955	30.8853	31.0265		323.31	12964000000	388		tr|N0E337|N0E337_9MICO Putative peptidase OS=Tetrasphaera elongata Lp2 GN=BN10_1460012 PE=4 SV=1
	0.464278	-0.204755	N0E168	29.4607	29.2291	29.2879	29.2881	29.1999	30.0443	29.265	29.5757		252.08	4973200000	158		tr|N0E168|N0E168_9MICO Glutamate--tRNA ligase OS=Tetrasphaera elongata Lp2 GN=gltX PE=3 SV=1
	0.845484	-0.205055	N0E3K7	29.9347	29.9481	29.8558	29.9307	29.8797	30.4151	29.9824	30.2123		323.31	7482700000	258		tr|N0E3K7|N0E3K7_9MICO Ferrochelatase OS=Tetrasphaera elongata Lp2 GN=hemH PE=3 SV=1
	0.264926	-0.205543	N0E0F6	24.0446	24.0211	23.8231	23.2392	23.5689	24.5444	23.5282	24.3088		13.214	78485000	8		tr|N0E0F6|N0E0F6_9MICO Putative SAM-dependent methyltransferase OS=Tetrasphaera elongata Lp2 GN=BN10_1380011 PE=4 SV=1
	0.917496	-0.206912	N0E3M6	31.8877	32.0538	31.8753	32.0265	31.9908	32.4609	32.0468	32.1724		323.31	30642000000	694		tr|N0E3M6|N0E3M6_9MICO 1,4-alpha-glucan branching enzyme GlgB OS=Tetrasphaera elongata Lp2 GN=glgB PE=3 SV=1
	0.960146	-0.208038	N0E367	29.2268	29.3504	29.2849	29.4679	29.3931	29.8051	29.3904	29.5735		323.31	5008700000	168		tr|N0E367|N0E367_9MICO 3-oxoacyl-[acyl-carrier-protein] synthase 3 OS=Tetrasphaera elongata Lp2 GN=fabH PE=3 SV=1
	1.07537	-0.209036	N0E4W7	27.7842	27.7425	27.3674	27.6482	27.7764	27.944	27.798	27.8601		58.531	1427300000	64		tr|N0E4W7|N0E4W7_9MICO Uncharacterized protein OS=Tetrasphaera elongata Lp2 GN=BN10_730016 PE=4 SV=1
	0.320652	-0.209231	N0E0W9	25.0892	24.0171	24.7271	24.9153	24.9723	24.4777	24.9858	25.1499		23.063	192610000	7		tr|N0E0W9|N0E0W9_9MICO Uncharacterized protein OS=Tetrasphaera elongata Lp2 GN=BN10_1070009 PE=4 SV=1
	0.372268	-0.209701	N0DZS7	25.0059	25.5407	25.1968	25.6114	25.9075	25.1025	25.3263	25.8572		15.319	329510000	16		tr|N0DZS7|N0DZS7_9MICO Uncharacterized protein OS=Tetrasphaera elongata Lp2 GN=BN10_520044 PE=4 SV=1
	0.410352	-0.210136	N0DYU3	23.9171	24.2026	24.593	24.2098	24.5127	24.7885	24.5217	23.9403		19.409	140100000	8		tr|N0DYU3|N0DYU3_9MICO Glycosyl transferase family 2 OS=Tetrasphaera elongata Lp2 GN=BN10_1030009 PE=4 SV=1
	0.764198	-0.211065	N0DY88	26.8364	27.0415	27.2591	26.8364	27.237	27.3399	26.9376	27.3031		102.08	966950000	40		tr|N0DY88|N0DY88_9MICO Uncharacterized protein OS=Tetrasphaera elongata Lp2 GN=BN10_1470001 PE=4 SV=1
	1.62112	-0.211562	N0DZW4	33.5684	33.7048	33.6534	33.8135	33.7561	33.9383	33.9163	33.9755		323.31	98284000000	652		tr|N0DZW4|N0DZW4_9MICO Malate dehydrogenase OS=Tetrasphaera elongata Lp2 GN=mdh PE=3 SV=1
	0.791871	-0.211637	N0E2I0	25.8565	25.8441	26.1772	25.6414	26.2768	25.9431	26.0149	26.1309		41.431	466380000	24		tr|N0E2I0|N0E2I0_9MICO Uncharacterized protein OS=Tetrasphaera elongata Lp2 GN=BN10_780019 PE=4 SV=1
	1.05905	-0.213052	N0E2G9	33.7873	33.7314	34.1464	34.0009	34.0278	34.21	34.1035	34.177		323.31	117360000000	632		tr|N0E2G9|N0E2G9_9MICO 10 kDa chaperonin OS=Tetrasphaera elongata Lp2 GN=groS PE=3 SV=1
	1.30427	-0.213476	N0DYG1	31.2711	31.4601	31.3937	31.3725	31.533	31.7803	31.4117	31.6263		323.31	20124000000	291		tr|N0DYG1|N0DYG1_9MICO sn-glycerol-3-phosphate import ATP-binding protein UgpC OS=Tetrasphaera elongata Lp2 GN=ugpC PE=4 SV=1
	0.556373	-0.215118	N0E3H3	26.8621	26.9523	26.3793	26.9197	26.7457	26.9168	26.9919	27.3193		80.369	819440000	33		tr|N0E3H3|N0E3H3_9MICO Putative alkanal monooxygenase OS=Tetrasphaera elongata Lp2 GN=yvbT PE=4 SV=1
	1.16121	-0.218328	N0E2M5	26.457	26.433	26.4177	26.3668	26.7631	26.8391	26.4413	26.5044		75.648	678340000	41		tr|N0E2M5|N0E2M5_9MICO Putative chromosome-partitioning protein parB OS=Tetrasphaera elongata Lp2 GN=parB PE=4 SV=1
	0.609777	-0.220892	N0E0N8	25.0481	24.6132	24.6846	24.6858	25.3588	24.8432	24.7063	25.0071		22.319	169850000	10		tr|N0E0N8|N0E0N8_9MICO Protein export protein SecD OS=Tetrasphaera elongata Lp2 GN=BN10_590055 PE=4 SV=1
	0.656488	-0.221543	N0E6F0	29.8821	29.9781	29.3393	29.9979	30.1419	30.0074	29.9194	30.0149		173.65	6639000000	163		tr|N0E6F0|N0E6F0_9MICO Glutathione peroxidase OS=Tetrasphaera elongata Lp2 GN=bsaA PE=3 SV=1
	1.04051	-0.222292	N0E0G2	27.2767	26.8484	26.9467	26.7966	27.1289	27.182	27.2481	27.1987		142.46	961470000	55		tr|N0E0G2|N0E0G2_9MICO Putative mutase OS=Tetrasphaera elongata Lp2 GN=BN10_560075 PE=4 SV=1
	0.737608	-0.223262	N0E6E0	26.3384	26.3955	25.8828	26.1147	26.4911	26.1684	26.3718	26.5932		32.597	588790000	24		tr|N0E6E0|N0E6E0_9MICO Trans-aconitate 2-methyltransferase OS=Tetrasphaera elongata Lp2 GN=tam PE=4 SV=1
	0.518643	-0.226183	N0DZR0	27.5382	27.7054	27.1766	27.3954	27.3998	28.1125	27.4368	27.7713		73.388	1394200000	32		tr|N0DZR0|N0DZR0_9MICO DNA-binding response regulator mtrA OS=Tetrasphaera elongata Lp2 GN=mtrA PE=4 SV=1
	0.723398	-0.229027	N0E368	26.5652	27.0621	26.7609	26.8903	26.9339	27.3779	26.8694	27.0134		80.368	854040000	38		tr|N0E368|N0E368_9MICO Putative 5-methyladenine/5-methylcytosine-specific restriction endonuclease OS=Tetrasphaera elongata Lp2 GN=mrr PE=4 SV=1
	0.174481	-0.229484	N0E407	25.0414	23.774	22.9958	25.0068	24.1307	24.632	24.4294	24.5437		3.6395	133040000	6		tr|N0E407|N0E407_9MICO Uncharacterized protein OS=Tetrasphaera elongata Lp2 GN=BN10_290007 PE=4 SV=1
	0.274263	-0.232194	N0DZ72	25.5028	25.22	25.0628	26.2291	26.2151	25.9094	25.0959	25.7232		29.63	346140000	13		tr|N0DZ72|N0DZ72_9MICO Putative transcriptional regulator OS=Tetrasphaera elongata Lp2 GN=BN10_1090009 PE=4 SV=1
	0.844237	-0.233248	N0E5U2	30.8983	30.7726	30.9317	30.9501	31.3419	31.2806	31.1118	30.7513		323.31	14526000000	201		tr|N0E5U2|N0E5U2_9MICO Uncharacterized protein OS=Tetrasphaera elongata Lp2 GN=BN10_990026 PE=4 SV=1
	1.4457	-0.234571	N0E2F7	28.96	29.0686	28.9013	28.9294	29.0081	29.384	29.157	29.2485		251.03	3887500000	123		tr|N0E2F7|N0E2F7_9MICO Putative Zn-dependent hydrolase OS=Tetrasphaera elongata Lp2 GN=BN10_770003 PE=4 SV=1
	0.925406	-0.235168	N0E3R3	25.7703	25.4152	25.5565	25.486	25.7266	25.9902	25.529	25.9229		49.865	372050000	24		tr|N0E3R3|N0E3R3_9MICO Pup deamidase/depupylase OS=Tetrasphaera elongata Lp2 GN=dop PE=4 SV=1
	0.737933	-0.235189	N0E1J4	26.2516	26.2573	26.1359	26.1257	26.8003	26.2876	26.0972	26.5262		46.203	562340000	16		tr|N0E1J4|N0E1J4_9MICO Putative Hydrolase, isochorismatase OS=Tetrasphaera elongata Lp2 GN=BN10_650019 PE=4 SV=1
	1.15474	-0.235581	N0E3M9	26.367	26.4362	26.0694	26.4183	26.6494	26.4498	26.4464	26.6878		36.488	658820000	24		tr|N0E3M9|N0E3M9_9MICO Uncharacterized protein OS=Tetrasphaera elongata Lp2 GN=BN10_560003 PE=4 SV=1
	1.57081	-0.235602	N0E5D8	30.4049	30.5927	30.3643	30.5677	30.6647	30.7859	30.5852	30.8363		323.31	10943000000	314		tr|N0E5D8|N0E5D8_9MICO Glutamate synthase (Small subunit) OS=Tetrasphaera elongata Lp2 GN=gltB PE=4 SV=1
	1.07432	-0.235637	N0E2B0	33.7839	34.0371	33.589	33.967	34.0906	34.2284	33.9939	34.0067		323.31	105040000000	467		tr|N0E2B0|N0E2B0_9MICO 50S ribosomal protein L15 OS=Tetrasphaera elongata Lp2 GN=rplO PE=3 SV=1
	1.17471	-0.236558	N0E2H1	26.9101	27.1644	27.029	27.0951	27.4562	27.0284	27.3405	27.3197		75.795	1041000000	28		tr|N0E2H1|N0E2H1_9MICO Chorismate synthase OS=Tetrasphaera elongata Lp2 GN=BN10_470016 PE=4 SV=1
	1.17537	-0.238273	N0E2Y7	26.2149	26.2323	25.9607	26.0062	26.2617	26.3959	26.5389	26.1706		49.775	623800000	18		tr|N0E2Y7|N0E2Y7_9MICO Sulfurtransferase OS=Tetrasphaera elongata Lp2 GN=sseB PE=4 SV=1
	1.50274	-0.239746	N0DY31	31.3539	31.5418	31.2187	31.4444	31.5486	31.5698	31.7764	31.623		277.47	21890000000	190		tr|N0DY31|N0DY31_9MICO Arginase OS=Tetrasphaera elongata Lp2 GN=rocF PE=3 SV=1
	0.875161	-0.240803	N0E233	28.0581	27.8932	27.797	27.8053	27.7971	28.3878	28.1066	28.2253		196.68	1826400000	65		tr|N0E233|N0E233_9MICO Putative polyprenyl synthase / dimethylallyltranstransferase OS=Tetrasphaera elongata Lp2 GN=BN10_360043 PE=3 SV=1
	1.25725	-0.24089	N0E215	28.34	28.5877	28.5903	28.293	28.5745	28.8515	28.6094	28.7392		145.9	2543900000	69		tr|N0E215|N0E215_9MICO Uncharacterized protein OS=Tetrasphaera elongata Lp2 GN=BN10_1260018 PE=4 SV=1
	0.933078	-0.242428	N0DXC3	30.5238	30.7497	30.5312	30.5336	30.6462	30.6018	30.9674	31.0927		323.31	11845000000	230		tr|N0DXC3|N0DXC3_9MICO Uncharacterized protein OS=Tetrasphaera elongata Lp2 GN=BN10_10010 PE=3 SV=1
	0.406525	-0.244226	N0E4H5	23.4223	23.3818	23.4948	24.2626	23.7983	23.9942	24.2601	23.4858		5.9249	75159000	7		tr|N0E4H5|N0E4H5_9MICO NADH-quinone oxidoreductase subunit B OS=Tetrasphaera elongata Lp2 GN=nuoB PE=3 SV=1
	0.899486	-0.245039	N0DZH6	29.5282	29.4734	29.5696	29.5057	29.833	30.0952	29.6856	29.4433		201.62	5911400000	138		tr|N0DZH6|N0DZH6_9MICO Putative phenylalanine aminotransferase OS=Tetrasphaera elongata Lp2 GN=pat PE=3 SV=1
	0.318714	-0.245831	N0E0K7	24.0608	23.3442	24.6352	24.2836	24.2668	24.8461	24.1653	24.0288		17.089	125550000	13		tr|N0E0K7|N0E0K7_9MICO Uncharacterized protein OS=Tetrasphaera elongata Lp2 GN=BN10_1000005 PE=4 SV=1
	0.819111	-0.246936	N0E1A7	27.4191	27.6153	27.2639	27.2414	27.9978	27.4908	27.4825	27.5563		88.196	1369700000	47		tr|N0E1A7|N0E1A7_9MICO Uncharacterized protein OS=Tetrasphaera elongata Lp2 GN=BN10_1100008 PE=4 SV=1
	1.09338	-0.247446	N0E333	27.0565	27.1425	26.994	26.8911	27.2593	27.5456	27.0334	27.2356		122.76	968070000	45		tr|N0E333|N0E333_9MICO Uncharacterized protein OS=Tetrasphaera elongata Lp2 GN=BN10_920023 PE=4 SV=1
	0.0806242	-0.247471	N0E082	25.3853	24.9498	25.1958	21.5285	25.4228	22.6772	25.046	24.9033		23.626	224520000	13		tr|N0E082|N0E082_9MICO UPF0271 protein ycsF OS=Tetrasphaera elongata Lp2 GN=ycsF PE=3 SV=1
	0.835082	-0.247526	N0E1X6	25.3843	25.8378	25.5712	25.9595	25.9342	25.8095	26.1372	25.8619		41.423	395120000	13		tr|N0E1X6|N0E1X6_9MICO Uncharacterized protein OS=Tetrasphaera elongata Lp2 GN=BN10_300102 PE=4 SV=1
	0.516829	-0.247834	N0DXF2	25.3091	25.0672	25.1935	25.2486	25.9926	25.0385	25.5906	25.1879		19.159	292950000	11		tr|N0DXF2|N0DXF2_9MICO Putative magnesium (Mg2+) transporter OS=Tetrasphaera elongata Lp2 GN=BN10_1070038 PE=4 SV=1
	1.7115	-0.249942	N0E5H7	32.7023	32.9186	32.5788	32.8084	32.9845	33.0931	32.9575	32.9728		323.31	51171000000	653		tr|N0E5H7|N0E5H7_9MICO Glycine--tRNA ligase OS=Tetrasphaera elongata Lp2 GN=glyQS PE=3 SV=1
	1.03742	-0.250011	N0E2E8	28.0457	28.4131	27.9765	28.4133	28.482	28.5607	28.3513	28.4547		270.28	2378400000	83		tr|N0E2E8|N0E2E8_9MICO Glycerol-3-phosphate dehydrogenase [NAD(P)+] OS=Tetrasphaera elongata Lp2 GN=gpsA PE=3 SV=1
	0.709238	-0.250971	N0DY55	29.0592	29.2994	29.2373	29.1671	29.0301	29.7915	29.3491	29.5961		235.22	4492100000	97		tr|N0DY55|N0DY55_9MICO 6-phosphogluconolactonase OS=Tetrasphaera elongata Lp2 GN=BN10_1310002 PE=4 SV=1
	1.17104	-0.251528	N0E5G9	29.7951	30.0041	29.938	29.9527	30.1966	30.4514	30.0807	29.9673		265.58	7315700000	226		tr|N0E5G9|N0E5G9_9MICO Putative Glutamate-binding protein (GluB) OS=Tetrasphaera elongata Lp2 GN=BN10_900017 PE=3 SV=1
	1.66691	-0.253544	N0E1B2	28.8094	28.8803	28.7796	28.9121	29.1327	28.9077	29.0785	29.2767		192.76	3635500000	88		tr|N0E1B2|N0E1B2_9MICO F420-dependent glucose-6-phosphate dehydrogenase OS=Tetrasphaera elongata Lp2 GN=fgd PE=3 SV=1
	0.435439	-0.254357	N0E0X7	24.6957	24.9038	24.873	23.9447	24.6713	24.8206	24.6992	25.2437		21.706	197730000	11		tr|N0E0X7|N0E0X7_9MICO Putative short chain dehydrogenase OS=Tetrasphaera elongata Lp2 GN=BN10_1590002 PE=4 SV=1
	0.792427	-0.254443	N0E5C2	26.4855	26.6016	25.9945	26.3434	26.7339	26.541	26.3902	26.7776		73.331	596980000	27		tr|N0E5C2|N0E5C2_9MICO 4,5-DOPA dioxygenase extradiol-like protein OS=Tetrasphaera elongata Lp2 GN=BN10_580004 PE=4 SV=1
	1.61835	-0.254832	N0E0N2	28.7546	28.8994	28.6843	28.8163	29.25	28.9899	28.92	29.0141		143.79	3417400000	105		tr|N0E0N2|N0E0N2_9MICO Uncharacterized protein OS=Tetrasphaera elongata Lp2 GN=BN10_1490003 PE=4 SV=1
	0.53523	-0.257025	N0E438	26.6659	25.9442	25.9314	26.042	26.4084	26.7223	26.0528	26.4279		94.805	531250000	27		tr|N0E438|N0E438_9MICO Uncharacterized protein OS=Tetrasphaera elongata Lp2 GN=BN10_300030 PE=4 SV=1
	0.190544	-0.257385	N0E3I9	26.552	24.331	26.3406	26.0628	26.0919	25.7389	26.4942	25.9909		31.207	510210000	18		tr|N0E3I9|N0E3I9_9MICO Uncharacterized protein OS=Tetrasphaera elongata Lp2 GN=BN10_560049 PE=4 SV=1
	1.57179	-0.257897	N0E672	28.2731	28.3916	28.0487	28.4011	28.6332	28.499	28.4876	28.5265		182.13	2337400000	113		tr|N0E672|N0E672_9MICO Putative NADH dehydrogenase NDH OS=Tetrasphaera elongata Lp2 GN=BN10_760032 PE=4 SV=1
	1.72043	-0.258053	N0DXN3	27.3541	27.5057	27.548	27.3991	27.7412	27.7644	27.5138	27.8198		166.21	1395800000	47		tr|N0DXN3|N0DXN3_9MICO Putative Proline dehydrogenase OS=Tetrasphaera elongata Lp2 GN=BN10_1210009 PE=4 SV=1
	0.686518	-0.258821	N0DXJ4	26.0767	26.2342	26.6459	26.5479	26.9077	26.3844	26.7821	26.466		60.872	695440000	34		tr|N0DXJ4|N0DXJ4_9MICO Phenazine biosynthesis PhzC/PhzF protein OS=Tetrasphaera elongata Lp2 GN=BN10_1150011 PE=4 SV=1
	1.10824	-0.261048	N0E6F3	26.926	26.6732	26.8527	27.0208	26.841	27.2822	27.1764	27.2173		80.039	853350000	26		tr|N0E6F3|N0E6F3_9MICO Uncharacterized protein OS=Tetrasphaera elongata Lp2 GN=BN10_930018 PE=4 SV=1
	0.653823	-0.262003	N0E5F2	25.8916	26.1186	25.573	25.5686	25.6889	26.3111	25.9867	26.2132		53.162	405590000	35		tr|N0E5F2|N0E5F2_9MICO Uncharacterized protein OS=Tetrasphaera elongata Lp2 GN=BN10_860007 PE=4 SV=1
	0.149392	-0.263818	N0E561	24.6754	25.0631	22.353	25.0876	24.3776	24.2092	24.9207	24.7269		21.107	176490000	9		tr|N0E561|N0E561_9MICO 23S rRNA (Uracil-5-)-methyltransferase rumB OS=Tetrasphaera elongata Lp2 GN=rumB PE=4 SV=1
	0.806006	-0.267365	N0E1Z1	25.761	26.0799	25.5889	25.9836	25.8896	26.4161	25.9521	26.225		65.708	470690000	16		tr|N0E1Z1|N0E1Z1_9MICO Putative enoyl-CoA hydratase echA8 OS=Tetrasphaera elongata Lp2 GN=BN10_1250012 PE=4 SV=1
	0.301823	-0.269064	N0E3Z6	25.9345	26.1702	24.4937	25.6541	25.7838	25.7377	25.9038	25.9035		27.325	411320000	16		tr|N0E3Z6|N0E3Z6_9MICO Histidine kinase OS=Tetrasphaera elongata Lp2 GN=BN10_590017 PE=4 SV=1
	1.52005	-0.269113	N0E2T4	31.1334	31.321	31.048	31.4192	31.5741	31.5681	31.3967	31.4592		323.31	17950000000	317		tr|N0E2T4|N0E2T4_9MICO Phosphoserine transaminase OS=Tetrasphaera elongata Lp2 GN=serC PE=4 SV=1
	1.0416	-0.269327	N0E1U9	29.4247	29.1176	29.443	29.332	29.4443	29.9002	29.6311	29.419		211.31	5078900000	126		tr|N0E1U9|N0E1U9_9MICO O-acetylhomoserine (Thiol)-lyase OS=Tetrasphaera elongata Lp2 GN=cysD PE=3 SV=1
	0.678411	-0.278371	N0E2T7	28.1007	28.832	28.3635	28.7675	28.9246	28.5168	28.8065	28.9293		124.09	2883100000	83		tr|N0E2T7|N0E2T7_9MICO Putative membrane protein OS=Tetrasphaera elongata Lp2 GN=BN10_860015 PE=4 SV=1
	0.932712	-0.280864	N0DXX4	28.9866	29.3799	29.5054	29.4089	29.3977	29.8848	29.5686	29.5531		219.91	4880100000	127		tr|N0DXX4|N0DXX4_9MICO Uncharacterized protein OS=Tetrasphaera elongata Lp2 GN=BN10_120039 PE=4 SV=1
	0.342786	-0.283164	N0E5N8	25.9929	25.6946	24.6546	25.7445	25.8702	25.5787	25.4485	26.3219		31.917	344600000	15		tr|N0E5N8|N0E5N8_9MICO Putative 1-acylglycerol-3-phosphate O-acyltransferase OS=Tetrasphaera elongata Lp2 GN=BN10_940004 PE=4 SV=1
	1.3345	-0.285366	N0DZA4	26.7158	26.7819	26.476	26.6415	27.063	26.6732	27.072	26.9485		59.289	803150000	49		tr|N0DZA4|N0DZA4_9MICO N-methylhydantoinase (ATP-hydrolyzing) B 2 OS=Tetrasphaera elongata Lp2 GN=BN10_430003 PE=4 SV=1
	0.438803	-0.285503	N0E3F8	24.5454	24.6836	25.3217	24.6234	25.2189	24.6527	24.7803	25.6643		28.356	250780000	18		tr|N0E3F8|N0E3F8_9MICO Coenzyme A biosynthesis bifunctional protein CoaBC OS=Tetrasphaera elongata Lp2 GN=BN10_980003 PE=4 SV=1
	1.42432	-0.288137	N0E515	28.449	28.4554	28.584	28.6653	28.9029	29.0596	28.6733	28.6704		71.668	2896700000	70		tr|N0E515|N0E515_9MICO Peptidase S1 and S6 chymotrypsin/Hap OS=Tetrasphaera elongata Lp2 GN=BN10_780013 PE=4 SV=1
	1.55034	-0.28936	N0DZM0	29.1722	29.2919	28.8963	29.1513	29.2625	29.427	29.4462	29.5333		321.96	4316800000	156		tr|N0DZM0|N0DZM0_9MICO Uncharacterized protein OS=Tetrasphaera elongata Lp2 GN=yeaC PE=4 SV=1
	1.53365	-0.29173	N0E1J6	26.4976	26.5776	26.7768	26.6046	26.7348	27.111	26.8097	26.968		103.5	811520000	41		tr|N0E1J6|N0E1J6_9MICO Putative glycerophosphoryl diester phosphodiesterase OS=Tetrasphaera elongata Lp2 GN=BN10_1160002 PE=4 SV=1
	1.36303	-0.295385	N0E6A7	30.9153	31.0434	30.8028	31.0156	31.2207	31.5242	31.0423	31.1714		318.43	15400000000	292		tr|N0E6A7|N0E6A7_9MICO 50S ribosomal protein L11 OS=Tetrasphaera elongata Lp2 GN=rplK PE=3 SV=1
	0.249364	-0.296473	N0E537	24.2975	24.3639	24.116	24.6061	24.75	23.4214	25.7344	24.6637		7.784	241380000	8		tr|N0E537|N0E537_9MICO Uncharacterized protein OS=Tetrasphaera elongata Lp2 GN=BN10_540033 PE=4 SV=1
	1.64523	-0.298749	N0DXH8	26.7384	26.6858	26.6702	26.7455	27.0002	27.2659	26.9683	26.8005		102.45	801740000	40		tr|N0DXH8|N0DXH8_9MICO CobG OS=Tetrasphaera elongata Lp2 GN=BN10_100003 PE=4 SV=1
	0.883714	-0.298817	N0DXU4	27.1101	27.3649	27.0422	27.4698	27.791	27.7143	27.4984	27.1786		161.71	1267700000	77		tr|N0DXU4|N0DXU4_9MICO Diaminopimelate decarboxylase OS=Tetrasphaera elongata Lp2 GN=lysA PE=3 SV=1
	0.92397	-0.301146	N0E4J5	26.9678	26.4028	26.9448	26.5667	27.0588	27.2564	26.8957	26.8758		37.581	863370000	26		tr|N0E4J5|N0E4J5_9MICO Acetyltransferase OS=Tetrasphaera elongata Lp2 GN=BN10_650047 PE=4 SV=1
	0.783342	-0.301402	N0E443	29.1027	29.0452	28.8873	28.9655	28.7647	29.5833	29.3629	29.4954		217.49	3849400000	114		tr|N0E443|N0E443_9MICO Uncharacterized protein OS=Tetrasphaera elongata Lp2 GN=BN10_610027 PE=4 SV=1
	0.680894	-0.302557	N0E126	27.882	27.7023	27.8807	27.2546	28.3202	28.1737	27.7251	27.7107		128.78	1726900000	54		tr|N0E126|N0E126_9MICO Regulatory protein, FmdB family OS=Tetrasphaera elongata Lp2 GN=BN10_630002 PE=4 SV=1
	1.21881	-0.3029	N0E5E2	30.8205	30.7279	30.6774	30.6819	30.8026	31.385	30.9047	31.027		323.31	12905000000	159		tr|N0E5E2|N0E5E2_9MICO 3-hydroxyacyl-CoA dehydrogenase type-2 OS=Tetrasphaera elongata Lp2 GN=HSD17B PE=3 SV=1
	1.19544	-0.303382	N0DZ49	29.1358	29.2144	29.1915	29.3243	29.3962	29.8707	29.2806	29.5319		222.92	4608100000	80		tr|N0DZ49|N0DZ49_9MICO 3-oxoacyl-(Acyl-carrier-protein) reductase OS=Tetrasphaera elongata Lp2 GN=fabG PE=3 SV=1
	0.128856	-0.304732	N0DZB5	24.7275	21.6312	25.0962	24.7911	24.9128	24.4891	24.7309	23.3321		44.104	157920000	6		tr|N0DZB5|N0DZB5_9MICO Putative transporter substrate-binding protein OS=Tetrasphaera elongata Lp2 GN=BN10_1130013 PE=3 SV=1
	1.4469	-0.304792	N0E5I9	25.3893	25.4951	25.2338	25.4014	25.5099	25.6759	25.9644	25.5886		30.402	346770000	21		tr|N0E5I9|N0E5I9_9MICO Pseudouridine synthase OS=Tetrasphaera elongata Lp2 GN=BN10_590041 PE=3 SV=1
	0.607121	-0.304836	N0E0F8	27.7279	27.9827	27.8367	27.9956	27.856	28.8625	27.9544	28.0893		40.4	1888800000	65		tr|N0E0F8|N0E0F8_9MICO Protein lsr2 OS=Tetrasphaera elongata Lp2 GN=lsr PE=4 SV=1
	0.933467	-0.305882	N0E2S0	25.6061	25.2537	25.169	25.664	25.6239	26.0154	25.7799	25.497		23.796	330020000	15		tr|N0E2S0|N0E2S0_9MICO Uncharacterized protein OS=Tetrasphaera elongata Lp2 GN=BN10_840027 PE=4 SV=1
	1.0848	-0.306827	N0E5S6	25.0572	25.102	24.7457	25.0549	25.484	25.2266	24.9811	25.4954		16.432	228810000	14		tr|N0E5S6|N0E5S6_9MICO HTH-type transcriptional activator tipA OS=Tetrasphaera elongata Lp2 GN=tipA PE=4 SV=1
	1.09838	-0.308636	N0E3Q7	29.5688	28.9486	29.2826	29.2069	29.5624	29.6876	29.6328	29.3586		228.53	4647800000	68		tr|N0E3Q7|N0E3Q7_9MICO Sec-independent protein translocase protein TatA OS=Tetrasphaera elongata Lp2 GN=tatA PE=3 SV=1
	1.30346	-0.309292	N0E3R0	28.1015	28.5534	28.3603	28.526	28.8717	28.7365	28.5363	28.634		244.42	2765200000	106		tr|N0E3R0|N0E3R0_9MICO Uncharacterized protein OS=Tetrasphaera elongata Lp2 GN=BN10_570038 PE=4 SV=1
	0.882443	-0.309506	N0DXX2	32.1446	32.2753	32.1538	32.3375	32.4478	33.0378	32.3897	32.2739		323.31	35852000000	309		tr|N0DXX2|N0DXX2_9MICO 30S ribosomal protein S9 OS=Tetrasphaera elongata Lp2 GN=rpsI PE=3 SV=1
	1.04063	-0.312917	N0E495	32.0976	31.9792	31.9433	32.0347	32.4913	32.6716	32.0942	32.0494		223.52	31552000000	170		tr|N0E495|N0E495_9MICO 50S ribosomal protein L21 OS=Tetrasphaera elongata Lp2 GN=rplU PE=3 SV=1
	1.28607	-0.313596	N0E350	27.5874	27.9073	27.5156	27.6999	27.9481	28.1729	27.7359	28.1076		159.26	1576700000	67		tr|N0E350|N0E350_9MICO Putative galactose mutarotase OS=Tetrasphaera elongata Lp2 GN=BN10_1490006 PE=4 SV=1
	0.187541	-0.313766	N0DYE4	23.8791	25.7139	26.9332	26.2553	26.0974	26.0487	25.9616	25.9288		30.905	545140000	13		tr|N0DYE4|N0DYE4_9MICO tRNA pseudouridine synthase B OS=Tetrasphaera elongata Lp2 GN=truB PE=3 SV=1
	0.819844	-0.314959	N0E523	24.6932	24.2686	24.4805	24.184	24.5968	25.1602	24.4478	24.6812		13.195	157010000	9		tr|N0E523|N0E523_9MICO Putative acetyltransferase OS=Tetrasphaera elongata Lp2 GN=BN10_780017 PE=4 SV=1
	1.48235	-0.319184	N0E3M4	26.5247	26.6529	26.7917	26.7526	27.0472	27.2506	26.9149	26.7859		52.449	815000000	48		tr|N0E3M4|N0E3M4_9MICO Uncharacterized protein OS=Tetrasphaera elongata Lp2 GN=BN10_960012 PE=4 SV=1
	0.860359	-0.325722	N0E4D5	27.1057	27.6772	27.497	27.3044	27.475	28.1398	27.6726	27.5999		42.511	1362600000	37		tr|N0E4D5|N0E4D5_9MICO Arsenate reductase OS=Tetrasphaera elongata Lp2 GN=arsC PE=4 SV=1
	0.750423	-0.32661	N0E1W4	25.2656	26.2085	25.6522	25.9898	26.1901	25.9867	26.0261	26.2195		31.059	401750000	17		tr|N0E1W4|N0E1W4_9MICO Type I restriction-modification system OS=Tetrasphaera elongata Lp2 GN=BN10_300087 PE=4 SV=1
	1.48323	-0.326771	N0E300	25.6922	26.1925	25.7903	25.985	26.2515	26.3224	26.2689	26.1242		16.702	516270000	27		tr|N0E300|N0E300_9MICO Uncharacterized protein OS=Tetrasphaera elongata Lp2 GN=BN10_900044 PE=4 SV=1
	1.28349	-0.329609	N0E3C6	28.5995	29.0645	28.9592	29.2112	29.3279	29.2006	29.246	29.3784		165.36	3842200000	100		tr|N0E3C6|N0E3C6_9MICO Uncharacterized protein OS=Tetrasphaera elongata Lp2 GN=BN10_920022 PE=4 SV=1
	1.52061	-0.333023	N0DZ47	25.4839	25.7957	25.6202	25.8431	25.9724	26.0699	25.8162	26.2165		48.536	373770000	31		tr|N0DZ47|N0DZ47_9MICO GTPase Obg OS=Tetrasphaera elongata Lp2 GN=obg PE=3 SV=1
	0.6407	-0.334406	N0DY81	26.7159	27.3528	27.7901	27.4907	27.5823	27.9633	27.6681	27.4734		88.658	1304300000	42		tr|N0DY81|N0DY81_9MICO GFO/IDH/MOCA family oxidoreductase OS=Tetrasphaera elongata Lp2 GN=BN10_1380003 PE=4 SV=1
	0.838729	-0.336432	N0E1R2	26.8662	27.4159	26.8739	27.2523	27.583	27.1504	27.2446	27.776		91.13	1260000000	60		tr|N0E1R2|N0E1R2_9MICO Uncharacterized protein OS=Tetrasphaera elongata Lp2 GN=yeaC PE=4 SV=1
	1.17311	-0.337386	N0E1S3	25.1925	25.3316	25.1474	25.2204	25.4174	25.8533	25.2224	25.7485		30.248	290470000	22		tr|N0E1S3|N0E1S3_9MICO Uncharacterized protein OS=Tetrasphaera elongata Lp2 GN=BN10_1200007 PE=3 SV=1
	1.63859	-0.347037	N0E258	30.6895	30.6542	30.6239	30.6479	30.9035	31.3304	30.8148	30.955		323.31	12602000000	244		tr|N0E258|N0E258_9MICO Citrate synthase OS=Tetrasphaera elongata Lp2 GN=gltA PE=3 SV=1
	1.71739	-0.349538	N0E629	28.5516	28.6745	28.32	28.5755	28.9615	28.7775	29.0643	28.7166		165.58	2924600000	115		tr|N0E629|N0E629_9MICO O-succinylhomoserine sulfhydrylase OS=Tetrasphaera elongata Lp2 GN=metZ PE=3 SV=1
	0.883347	-0.351953	N0E474	26.0853	26.6403	26.4558	26.1776	26.7375	27.1137	26.4312	26.4845		88.787	603590000	28		tr|N0E474|N0E474_9MICO 3-isopropylmalate dehydratase small subunit OS=Tetrasphaera elongata Lp2 GN=leuD PE=3 SV=1
	0.940473	-0.356393	N0E4B3	28.2875	28.6188	28.0467	28.3493	29.1366	28.5968	28.4893	28.5051		79.768	2574200000	44		tr|N0E4B3|N0E4B3_9MICO Uncharacterized protein OS=Tetrasphaera elongata Lp2 GN=BN10_630014 PE=4 SV=1
	1.22596	-0.358145	N0E2Y9	29.2527	29.2462	29.7581	29.3973	29.8582	29.9415	29.4955	29.7916		235.09	5260800000	98		tr|N0E2Y9|N0E2Y9_9MICO Uncharacterized protein OS=Tetrasphaera elongata Lp2 GN=BN10_840011 PE=4 SV=1
	1.24889	-0.361118	N0DYK6	27.1267	27.3629	27.0778	27.4372	27.4587	27.911	27.359	27.7203		52.889	1214500000	26		tr|N0DYK6|N0DYK6_9MICO Uncharacterized protein OS=Tetrasphaera elongata Lp2 GN=BN10_1720004 PE=4 SV=1
	1.30421	-0.362759	N0DY37	27.4877	27.5075	27.3863	27.6903	27.4811	28.0417	27.9855	28.0146		104.94	1394300000	60		tr|N0DY37|N0DY37_9MICO Beta-glucosidase OS=Tetrasphaera elongata Lp2 GN=bglA PE=3 SV=1
	1.52912	-0.364051	N0E314	26.467	26.5901	26.2185	26.3507	26.7095	26.6103	26.6976	27.065		24.923	584270000	22		tr|N0E314|N0E314_9MICO Uncharacterized protein OS=Tetrasphaera elongata Lp2 GN=BN10_520067 PE=4 SV=1
	1.09478	-0.364554	N0E3J3	27.3485	27.1397	27.2945	27.4568	27.4191	28.1397	27.6212	27.5178		108.47	1199300000	40		tr|N0E3J3|N0E3J3_9MICO Uncharacterized protein OS=Tetrasphaera elongata Lp2 GN=BN10_1700005 PE=4 SV=1
	1.74184	-0.370205	N0DY85	28.8036	28.7147	28.4963	28.7374	28.8464	29.2181	28.9547	29.2136		268.34	3227400000	142		tr|N0DY85|N0DY85_9MICO Signal recognition particle protein OS=Tetrasphaera elongata Lp2 GN=ffh PE=3 SV=1
	1.39859	-0.373303	N0E343	30.1813	30.3475	30.3411	30.3368	30.5645	31.0845	30.5048	30.5461		323.31	9899300000	237		tr|N0E343|N0E343_9MICO Putative phosphomannomutase OS=Tetrasphaera elongata Lp2 GN=BN10_520036 PE=4 SV=1
	1.33216	-0.374826	N0E150	28.7209	28.6959	28.7029	28.5475	29.3188	29.2444	28.8948	28.7085		172.57	3412700000	97		tr|N0E150|N0E150_9MICO Iron-sulfur cluster assembly scaffold protein OS=Tetrasphaera elongata Lp2 GN=sufU PE=4 SV=1
	1.70015	-0.374957	N0E500	30.4789	30.6683	30.4444	30.7874	30.8417	31.2241	30.868	30.945		186.05	12622000000	212		tr|N0E500|N0E500_9MICO 50S ribosomal protein L23 OS=Tetrasphaera elongata Lp2 GN=rplW PE=3 SV=1
	1.64028	-0.375671	N0E603	30.689	30.7876	30.5428	30.8257	31.0026	31.0567	30.8981	31.3904		323.31	13696000000	221		tr|N0E603|N0E603_9MICO Acyl-CoA-binding protein OS=Tetrasphaera elongata Lp2 GN=BN10_680085 PE=4 SV=1
	1.1901	-0.37638	N0DXI7	31.7582	32.0098	31.7766	31.9424	31.9828	32.6673	32.2913	32.051		323.31	30713000000	317		tr|N0DXI7|N0DXI7_9MICO 50S ribosomal protein L31 OS=Tetrasphaera elongata Lp2 GN=rpmEA PE=3 SV=1
	1.34078	-0.378386	N0E3N9	28.1583	28.5136	27.8956	28.2473	28.5552	28.8015	28.4171	28.5546		206.79	2254100000	109		tr|N0E3N9|N0E3N9_9MICO 3-phosphoshikimate 1-carboxyvinyltransferase OS=Tetrasphaera elongata Lp2 GN=aroA PE=3 SV=1
	1.14689	-0.378552	N0E2R0	30.4569	30.3858	30.5782	30.5621	30.9502	31.3136	30.5781	30.6552		323.31	11384000000	210		tr|N0E2R0|N0E2R0_9MICO UPF0336 protein BN10_840012 OS=Tetrasphaera elongata Lp2 GN=BN10_840012 PE=3 SV=1
	0.168439	-0.380753	N0E3B9	24.5068	24.1643	23.9671	24.5289	24.5798	27.1449	23.5083	23.4571		25.857	103960000	5		tr|N0E3B9|N0E3B9_9MICO ATPase OS=Tetrasphaera elongata Lp2 GN=BN10_950004 PE=4 SV=1
	1.11122	-0.384966	N0DZ12	26.1361	25.9982	25.3437	25.9556	26.1902	26.3583	26.1694	26.2556		17.931	489740000	24		tr|N0DZ12|N0DZ12_9MICO Serine/threonine-protein kinase PK-1 OS=Tetrasphaera elongata Lp2 GN=spk PE=4 SV=1
	1.12624	-0.385005	N0E6E7	25.2684	25.232	25.2384	25.0502	26.0166	25.1905	25.6352	25.4867		27.779	297090000	14		tr|N0E6E7|N0E6E7_9MICO Uncharacterized protein OS=Tetrasphaera elongata Lp2 GN=BN10_920044 PE=4 SV=1
	1.15672	-0.385355	N0E1A9	25.7966	26.0294	25.3945	26.1404	26.3529	26.2939	26.1409	26.1146		28.561	486300000	17		tr|N0E1A9|N0E1A9_9MICO Glycerol-3-phosphate 1-O-acyltransferase OS=Tetrasphaera elongata Lp2 GN=plsB PE=4 SV=1
	1.57136	-0.3877	N0E2C3	26.939	27.4211	26.892	27.1839	27.3482	27.5054	27.5396	27.5936		45.99	1102900000	46		tr|N0E2C3|N0E2C3_9MICO Putative ABC transporter substrate-binding protein (For amino acid transport) OS=Tetrasphaera elongata Lp2 GN=BN10_130068 PE=3 SV=1
	1.20021	-0.389239	N0DZ58	27.7535	28.1356	27.506	28.135	28.3415	28.0804	28.2441	28.4209		76.098	1913500000	47		tr|N0DZ58|N0DZ58_9MICO NADH dehydrogenase subunit J OS=Tetrasphaera elongata Lp2 GN=BN10_460004 PE=3 SV=1
	0.344221	-0.392334	N0E197	23.9978	23.0568	24.2745	23.0639	23.9191	24.9686	23.1517	23.923		13.363	77038000	10		tr|N0E197|N0E197_9MICO Phospholipid-binding protein OS=Tetrasphaera elongata Lp2 GN=BN10_230004 PE=4 SV=1
	1.35135	-0.393684	N0DZV4	26.684	27.277	26.9167	27.1427	27.5002	27.5573	27.3611	27.1765		87.9	1016200000	33		tr|N0DZV4|N0DZV4_9MICO Leucine aminopeptidase 3, chloroplastic OS=Tetrasphaera elongata Lp2 GN=pepA PE=4 SV=1
	1.19974	-0.40041	N0E1R4	25.6594	25.4933	25.6139	25.2511	25.6308	26.3331	25.8463	25.8092		16.927	396450000	17		tr|N0E1R4|N0E1R4_9MICO Putative transport system secreted protein OS=Tetrasphaera elongata Lp2 GN=BN10_120041 PE=4 SV=1
	1.5617	-0.401094	N0DY21	28.9804	29.0215	28.8651	28.9338	29.5879	29.5772	29.1558	29.0843		68.066	4661600000	217		tr|N0DY21|N0DY21_9MICO Ferredoxin OS=Tetrasphaera elongata Lp2 GN=BN10_130016 PE=4 SV=1
	1.30591	-0.406531	N0E2B9	33.1401	32.9405	32.7912	33.1592	33.5668	33.7197	33.2739	33.0966		323.31	66538000000	255		tr|N0E2B9|N0E2B9_9MICO 50S ribosomal protein L28 OS=Tetrasphaera elongata Lp2 GN=rpmB PE=3 SV=1
	1.06003	-0.408092	N0E3Y9	25.8916	26.3714	26.0941	26.3398	26.9437	26.1614	26.5208	26.7035		45.986	614110000	31		tr|N0E3Y9|N0E3Y9_9MICO Putative enzyme OS=Tetrasphaera elongata Lp2 GN=BN10_590048 PE=4 SV=1
	1.60497	-0.410438	N0E397	25.7791	25.9355	25.9052	26.0039	26.6834	26.2293	26.2776	26.075		78.414	487640000	17		tr|N0E397|N0E397_9MICO NTP pyrophosphohydrolase OS=Tetrasphaera elongata Lp2 GN=BN10_1590026 PE=4 SV=1
	0.337329	-0.411153	N0E5L8	23.3687	23.8958	24.4758	24.3352	23.334	24.6719	24.1924	25.5218		5.0058	86711000	2		tr|N0E5L8|N0E5L8_9MICO Putative TetR-family transcriptional regulator OS=Tetrasphaera elongata Lp2 GN=BN10_920010 PE=4 SV=1
	0.453743	-0.412765	N0E5J2	25.5967	25.1498	24.1823	24.9383	25.5194	25.9933	25.377	24.6284		4.818	303240000	6		tr|N0E5J2|N0E5J2_9MICO DNA primase OS=Tetrasphaera elongata Lp2 GN=BN10_900021 PE=4 SV=1
	1.61465	-0.413886	N0DYR0	26.909	27.3922	27.3434	27.2228	27.6663	27.3787	27.7368	27.7411		73.317	1262600000	35		tr|N0DYR0|N0DYR0_9MICO Imidazolonepropionase OS=Tetrasphaera elongata Lp2 GN=hutI PE=3 SV=1
	1.47026	-0.414454	N0E5T9	25.8289	25.6258	25.4394	26.0626	26.268	25.9476	26.1939	26.205		44.995	424770000	23		tr|N0E5T9|N0E5T9_9MICO Putative DNA-binding protein OS=Tetrasphaera elongata Lp2 GN=BN10_990021 PE=4 SV=1
	0.428399	-0.415313	N0E6C4	24.5932	24.1814	24.0557	23.7736	25.2441	23.8232	25.2593	23.9386		5.4231	101800000	5		tr|N0E6C4|N0E6C4_9MICO Phosphate-specific transport system accessory protein PhoU OS=Tetrasphaera elongata Lp2 GN=phoU PE=3 SV=1
	0.691492	-0.416701	N0E6E5	24.737	25.8417	25.493	25.524	25.4839	26.1149	26.1185	25.5451		15.057	320340000	8		tr|N0E6E5|N0E6E5_9MICO Uncharacterized protein OS=Tetrasphaera elongata Lp2 GN=BN10_920034 PE=4 SV=1
	1.17662	-0.417262	N0DXC4	24.6058	25.2205	24.641	25.159	25.516	25.4325	25.1656	25.1812		13.257	267060000	16		tr|N0DXC4|N0DXC4_9MICO Glycerophosphoryl diester phosphodiesterase OS=Tetrasphaera elongata Lp2 GN=BN10_10015 PE=4 SV=1
	0.709576	-0.420005	N0E351	27.2131	25.907	26.3241	26.326	27.104	26.8634	26.7552	26.7277		24.93	830380000	16		tr|N0E351|N0E351_9MICO RNA 2,3-cyclic phosphodiesterase OS=Tetrasphaera elongata Lp2 GN=BN10_920043 PE=3 SV=1
	1.50037	-0.42707	N0E138	28.1492	28.2212	27.7882	28.1144	28.2969	28.8356	28.4769	28.3718		251.49	2272900000	92		tr|N0E138|N0E138_9MICO Putative aminotransferase OS=Tetrasphaera elongata Lp2 GN=BN10_1690003 PE=3 SV=1
	0.942754	-0.430283	N0DZK2	26.6126	26.8324	26.241	26.9047	27.4292	27.3424	26.7486	26.7918		94.085	869230000	42		tr|N0DZK2|N0DZK2_9MICO Uncharacterized protein OS=Tetrasphaera elongata Lp2 GN=BN10_1170006 PE=4 SV=1
	0.582903	-0.434452	N0E487	24.1289	24.6799	23.5188	24.5022	24.7891	24.9985	23.9389	24.841		8.9569	186060000	11		tr|N0E487|N0E487_9MICO Putative cyclopropane-fatty-acyl-phospholipid synthase UfaA1 (Cyclopropane fatty acid synthase) (CFA synthase) OS=Tetrasphaera elongata Lp2 GN=BN10_620011 PE=4 SV=1
	1.20902	-0.434474	N0E3L8	28.4856	28.0541	28.4307	28.3777	28.6513	29.2486	28.5124	28.6737		127.4	2555400000	68		tr|N0E3L8|N0E3L8_9MICO Uncharacterized protein OS=Tetrasphaera elongata Lp2 GN=BN10_560079 PE=4 SV=1
	1.25367	-0.434565	N0DZ98	28.4786	29.1193	28.4594	28.8664	29.0276	29.0497	29.1632	29.4215		281.13	3453600000	128		tr|N0DZ98|N0DZ98_9MICO Dihydrolipoamide dehydrogenase OS=Tetrasphaera elongata Lp2 GN=lpd PE=4 SV=1
	1.23464	-0.435101	N0E0E5	26.0887	26.8012	26.3515	26.5829	27.2028	26.7236	26.8157	26.8225		27.462	742660000	22		tr|N0E0E5|N0E0E5_9MICO Transcriptional regulator-like protein OS=Tetrasphaera elongata Lp2 GN=BN10_560050 PE=4 SV=1
	0.988759	-0.435366	N0DXQ4	27.6876	28.3192	28.2466	28.3777	28.6315	29.0128	28.4828	28.2454		82.527	2344600000	63		tr|N0DXQ4|N0DXQ4_9MICO Uncharacterized protein OS=Tetrasphaera elongata Lp2 GN=BN10_1250001 PE=4 SV=1
	1.19906	-0.442774	N0DXE3	31.847	32.0286	31.3813	31.9207	32.4343	32.4656	32.1441	31.9046		253.03	28850000000	218		tr|N0DXE3|N0DXE3_9MICO 50S ribosomal protein L35 OS=Tetrasphaera elongata Lp2 GN=rpmI PE=3 SV=1
	1.37169	-0.444621	N0DXQ3	28.733	29.1845	28.5631	29.0056	29.4509	29.2692	29.0426	29.502		188.57	3900700000	115		tr|N0DXQ3|N0DXQ3_9MICO Uncharacterized protein OS=Tetrasphaera elongata Lp2 GN=BN10_1080025 PE=4 SV=1
	0.880739	-0.451668	N0DYP0	23.4334	23.3777	23.7257	24.1158	23.8841	23.6939	24.3456	24.5357		3.4865	82483000	4		tr|N0DYP0|N0DYP0_9MICO Uncharacterized protein OS=Tetrasphaera elongata Lp2 GN=BN10_280005 PE=4 SV=1
	0.422522	-0.470362	N0E4Y6	23.2239	23.8481	23.1307	23.5103	24.4238	24.0721	24.5661	22.5325		10.426	46455000	5		tr|N0E4Y6|N0E4Y6_9MICO Transport permease protein OS=Tetrasphaera elongata Lp2 GN=BN10_520060 PE=3 SV=1
	0.648718	-0.475569	N0DZ26	25.6069	24.0784	25.3293	25.4237	25.5587	25.7148	25.5392	25.5278		39.641	316180000	15		tr|N0DZ26|N0DZ26_9MICO RecBCD enzyme subunit RecD OS=Tetrasphaera elongata Lp2 GN=recD PE=3 SV=1
	1.37356	-0.482128	N0E4H8	26.3704	26.8718	26.4243	26.7029	27.2047	27.0362	26.6882	27.369		38.214	816700000	23		tr|N0E4H8|N0E4H8_9MICO Uncharacterized protein OS=Tetrasphaera elongata Lp2 GN=BN10_680002 PE=4 SV=1
	0.825837	-0.484848	N0E2D3	25.2024	25.6781	24.9333	25.3318	26.1922	25.0626	25.8057	26.0245		36.71	394280000	18		tr|N0E2D3|N0E2D3_9MICO Galactokinase OS=Tetrasphaera elongata Lp2 GN=galK PE=3 SV=1
	1.25378	-0.496839	N0E4Q9	25.531	25.8347	25.6287	25.9804	25.9299	26.6667	25.9367	26.4289		37.393	484530000	27		tr|N0E4Q9|N0E4Q9_9MICO Transcriptional regulatory protein tcrA OS=Tetrasphaera elongata Lp2 GN=tcrA PE=4 SV=1
	1.04692	-0.496881	N0E550	30.0024	29.9261	29.353	29.8014	30.1422	30.8543	29.9839	30.0899		317.55	7279400000	91		tr|N0E550|N0E550_9MICO Protein GrpE OS=Tetrasphaera elongata Lp2 GN=grpE PE=3 SV=1
	0.901231	-0.498222	N0E321	28.4195	29.4006	28.3953	29.2121	29.1609	29.2129	29.5373	29.5092		164.4	3806000000	76		tr|N0E321|N0E321_9MICO N5-carboxyaminoimidazole ribonucleotide mutase OS=Tetrasphaera elongata Lp2 GN=purE PE=3 SV=1
	1.73122	-0.498927	N0E3E4	28.6147	28.756	28.3221	28.7428	29.2418	29.3635	28.8409	28.9851		112.94	3171500000	71		tr|N0E3E4|N0E3E4_9MICO ABC-type glycine betaine transport,substrate-binding protein OS=Tetrasphaera elongata Lp2 GN=BN10_1600018 PE=4 SV=1
	1.1043	-0.504703	N0DZ03	26.2278	26.9662	27.2941	26.7496	27.3358	27.538	27.1986	27.184		83.191	936370000	41		tr|N0DZ03|N0DZ03_9MICO Menaquinol-cytochrome c reductase cytochrome c subunit OS=Tetrasphaera elongata Lp2 GN=qcrC PE=4 SV=1
	0.402179	-0.50933	N0DYP7	25.7331	25.391	25.8276	23.5076	25.5485	25.7449	25.3207	25.8824		13.358	317780000	18		tr|N0DYP7|N0DYP7_9MICO L-lactate dehydrogenase OS=Tetrasphaera elongata Lp2 GN=ldh PE=3 SV=1
	1.04633	-0.513942	N0E538	23.5978	24.6082	24.6099	24.5004	24.7861	24.7492	25.0455	24.7912		10.075	161060000	10		tr|N0E538|N0E538_9MICO BNR/Asp-box repeat domain protein OS=Tetrasphaera elongata Lp2 GN=BN10_540038 PE=4 SV=1
	0.75456	-0.521091	N0E4M3	24.1358	24.3461	24.0086	24.2724	23.8715	25.4823	24.6574	24.8361		17.165	141280000	12		tr|N0E4M3|N0E4M3_9MICO Uncharacterized protein OS=Tetrasphaera elongata Lp2 GN=BN10_470024 PE=4 SV=1
	1.73044	-0.530905	N0DZX2	27.1772	27.6891	27.029	27.5302	27.9208	28.0507	27.7507	27.8269		139.02	1412600000	70		tr|N0DZX2|N0DZX2_9MICO Mycothiol acetyltransferase OS=Tetrasphaera elongata Lp2 GN=mshD PE=3 SV=1
	0.52893	-0.53144	N0E539	24.6689	26.3205	26.452	26.6386	26.7549	26.3204	26.6167	26.5139		37.508	527970000	23		tr|N0E539|N0E539_9MICO LemA family protein OS=Tetrasphaera elongata Lp2 GN=BN10_800004 PE=4 SV=1
	0.757947	-0.531769	N0E292	24.3805	25.4303	25.0563	25.0381	24.7576	25.9634	25.8079	25.5035		8.9824	302600000	26		tr|N0E292|N0E292_9MICO Uncharacterized protein OS=Tetrasphaera elongata Lp2 GN=BN10_360032 PE=4 SV=1
	1.33099	-0.53512	N0E0H9	23.5573	23.9268	24.3482	23.8532	24.1906	24.8075	24.5441	24.2838		10.776	127190000	9		tr|N0E0H9|N0E0H9_9MICO Deoxyribonucleoside regulator OS=Tetrasphaera elongata Lp2 GN=deoR PE=4 SV=1
	0.938099	-0.552832	N0E022	29.7093	29.4312	29.223	29.0518	30.0467	30.5504	29.7393	29.2902		121.65	5719300000	57		tr|N0E022|N0E022_9MICO 50S ribosomal protein L36 OS=Tetrasphaera elongata Lp2 GN=rpmJ PE=3 SV=1
	1.10354	-0.554709	N0E3I5	25.4256	24.2299	25.1099	24.9289	25.2934	25.6029	25.4551	25.5617		41.006	247680000	12		tr|N0E3I5|N0E3I5_9MICO 5-3 exonuclease OS=Tetrasphaera elongata Lp2 GN=BN10_560044 PE=4 SV=1
	0.49134	-0.570321	N0DZF0	23.3328	21.6531	23.5305	24.0068	23.3218	23.9021	23.8579	23.7224		14.695	73801000	6		tr|N0DZF0|N0DZF0_9MICO Putative RNA polymerase sigma-70 factor OS=Tetrasphaera elongata Lp2 GN=BN10_490003 PE=4 SV=1
	0.97498	-0.570753	N0E0R9	24.7197	25.0369	24.6159	25.7463	25.1998	25.9705	25.5824	25.6492		13.836	586540000	17		tr|N0E0R9|N0E0R9_9MICO DnaB domain protein helicase, C-terminal domain protein (Modular protein) OS=Tetrasphaera elongata Lp2 GN=BN10_140082 PE=4 SV=1
	0.455347	-0.57093	N0E1X7	25.487	24.9275	23.1229	25.4387	25.5303	25.0766	25.4197	25.2333		21.718	250910000	16		tr|N0E1X7|N0E1X7_9MICO Putative rRNA methylase OS=Tetrasphaera elongata Lp2 GN=BN10_1240013 PE=4 SV=1
	1.48692	-0.580468	N0DZ64	26.8154	26.4838	26.3541	26.6283	26.7496	27.5549	26.9416	27.3574		46.483	869260000	36		tr|N0DZ64|N0DZ64_9MICO Uncharacterized protein OS=Tetrasphaera elongata Lp2 GN=BN10_360014 PE=4 SV=1
	0.375039	-0.580996	N0E2D5	26.1717	25.7457	23.2865	25.7905	26.1597	25.733	25.8855	25.5401		30.827	374480000	13		tr|N0E2D5|N0E2D5_9MICO Short chain dehydrogenase OS=Tetrasphaera elongata Lp2 GN=BN10_800007 PE=3 SV=1
	1.68961	-0.591601	N0DYI0	26.918	26.9931	26.4141	26.7739	27.1129	27.7609	27.2663	27.3254		88.818	948540000	34		tr|N0DYI0|N0DYI0_9MICO Molybdopterin synthase catalytic subunit OS=Tetrasphaera elongata Lp2 GN=moaE PE=4 SV=1
	0.728353	-0.602121	N0E3Y3	23.0081	24.6232	23.9481	24.704	24.4306	24.8674	24.6178	24.776		67.864	153750000	13		tr|N0E3Y3|N0E3Y3_9MICO Redox-sensing transcriptional repressor Rex OS=Tetrasphaera elongata Lp2 GN=rex PE=3 SV=1
	0.678475	-0.617024	N0E316	24.8675	23.4986	24.5997	25.4147	25.2184	25.553	24.7301	25.347		25.978	250060000	10		tr|N0E316|N0E316_9MICO Uncharacterized protein OS=Tetrasphaera elongata Lp2 GN=BN10_850010 PE=4 SV=1
	1.37341	-0.623071	N0DXX7	24.6349	24.6644	24.849	23.9929	25.5031	24.7519	25.1879	25.1906		27.637	191960000	11		tr|N0DXX7|N0DXX7_9MICO Putative membrane protein OS=Tetrasphaera elongata Lp2 GN=BN10_1200005 PE=4 SV=1
	1.55668	-0.641885	N0E084	26.9033	27.4602	26.9372	27.4327	27.502	28.27	27.8152	27.7139		92.974	1154400000	46		tr|N0E084|N0E084_9MICO Proteasome subunit beta OS=Tetrasphaera elongata Lp2 GN=prcB PE=3 SV=1
	0.602897	-0.649776	N0E234	25.0421	25.3428	23.1165	25.007	25.316	25.2383	25.2316	25.3216		23.39	222830000	12		tr|N0E234|N0E234_9MICO Lipopolysaccharide biosynthesis protein OS=Tetrasphaera elongata Lp2 GN=BN10_720031 PE=4 SV=1
	0.638269	-0.668067	N0E5K0	23.7339	25.6678	25.768	25.6398	25.9197	26.1285	25.7255	25.7081		33.412	348980000	16		tr|N0E5K0|N0E5K0_9MICO Transcription-repair-coupling factor OS=Tetrasphaera elongata Lp2 GN=mfd PE=3 SV=1
	0.488977	-0.679795	N0E405	23.5314	25.8143	26.0213	25.7182	26.0777	26.0872	25.2454	26.394		31.677	388020000	12		tr|N0E405|N0E405_9MICO AP-4-A phosphorylase OS=Tetrasphaera elongata Lp2 GN=BN10_590073 PE=4 SV=1
	0.681577	-0.698247	N0DZ54	24.9195	25.2426	25.3848	23.2972	25.1589	25.3328	25.4291	25.7162		19.225	244540000	12		tr|N0DZ54|N0DZ54_9MICO ABC-type multidrug transport system ATPase componen OS=Tetrasphaera elongata Lp2 GN=BN10_1080013 PE=3 SV=1
	1.68059	-0.712664	N0DXV1	25.6075	26.4119	25.8458	26.2029	26.7535	27.0377	26.3489	26.7787		64.11	611730000	30		tr|N0DXV1|N0DXV1_9MICO Uncharacterized protein OS=Tetrasphaera elongata Lp2 GN=BN10_1170003 PE=4 SV=1
	0.360741	-0.716131	N0E0H8	21.5875	24.7403	24.0291	23.0995	24.1485	24.8739	24.7126	22.5859		9.9468	157050000	5		tr|N0E0H8|N0E0H8_9MICO Uncharacterized protein OS=Tetrasphaera elongata Lp2 GN=BN10_580048 PE=4 SV=1
	0.403262	-0.728898	N0E3F0	25.4773	22.4213	25.1037	25.5385	25.3186	24.6354	25.5016	26.0007		30.167	293080000	11		tr|N0E3F0|N0E3F0_9MICO Putative phosphoglycerate mutase family protein OS=Tetrasphaera elongata Lp2 GN=BN10_560004 PE=4 SV=1
	1.33796	-0.746428	N0E366	24.1666	24.5327	24.209	24.4928	25.4627	25.0396	24.3221	25.5625		6.504	146290000	7		tr|N0E366|N0E366_9MICO Uncharacterized protein OS=Tetrasphaera elongata Lp2 GN=BN10_1540004 PE=4 SV=1
	1.59313	-0.879	N0DXF8	23.8709	23.6909	23.6153	23.7993	24.9738	25.2601	24.1936	24.0648		6.8601	72754000	10		tr|N0DXF8|N0DXF8_9MICO Putative ABC transporter ATP binding protein OS=Tetrasphaera elongata Lp2 GN=BN10_1080026 PE=3 SV=1
	0.633082	-0.981329	N0DYP6	26.111	23.1387	26.0276	26.1144	26.1582	26.4296	26.3004	26.4289		65.316	534390000	14		tr|N0DYP6|N0DYP6_9MICO Putative acetyl-coenzyme A synthetase OS=Tetrasphaera elongata Lp2 GN=BN10_230020 PE=4 SV=1
	1.09356	-0.998982	N0E1U7	23.1289	25.1913	24.5898	24.6923	24.8841	25.5485	25.5691	25.5965		53.195	219340000	13		tr|N0E1U7|N0E1U7_9MICO SulD OS=Tetrasphaera elongata Lp2 GN=BN10_1210030 PE=4 SV=1
	0.83104	-1.01654	N0DXY5	26.5999	26.8293	24.6218	24.6003	26.6324	26.7959	26.7424	26.5468		21.636	808420000	10		tr|N0DXY5|N0DXY5_9MICO Uncharacterized protein OS=Tetrasphaera elongata Lp2 GN=BN10_1210023 PE=4 SV=1
	1.2042	-1.01862	N0E5V1	24.4258	25.7292	26.1507	25.9733	26.2852	27.2153	26.3374	26.5156		24.192	492510000	16		tr|N0E5V1|N0E5V1_9MICO Uncharacterized protein OS=Tetrasphaera elongata Lp2 GN=BN10_980020 PE=4 SV=1
	0.730827	-1.03931	N0E313	23.0346	25.6822	25.0983	23.4197	25.8553	25.6346	25.2908	24.6112		65.338	242290000	16		tr|N0E313|N0E313_9MICO Uncharacterized protein OS=Tetrasphaera elongata Lp2 GN=BN10_920003 PE=4 SV=1
	0.954546	-1.09096	N0E271	23.2989	25.4822	25.1482	25.7429	26.167	26.4639	25.6768	25.7283		19.404	403790000	12		tr|N0E271|N0E271_9MICO N-methylhydantoinase (ATP-hydrolyzing) A 2 OS=Tetrasphaera elongata Lp2 GN=BN10_430002 PE=4 SV=1
	1.65452	-1.10065	N0E447	23.4552	23.4132	24.8508	24.1602	25.1942	24.7372	25.0898	25.2608		41.1	182830000	11		tr|N0E447|N0E447_9MICO Ribosomal RNA small subunit methyltransferase H OS=Tetrasphaera elongata Lp2 GN=mraW PE=3 SV=1
	0.964109	-1.23277	N0E1N5	24.1881	22.6833	24.6066	23.5665	24.7691	26.4718	24.259	24.4757		12.543	206550000	9		tr|N0E1N5|N0E1N5_9MICO Catalase OS=Tetrasphaera elongata Lp2 GN=katE PE=3 SV=1
	0.836139	-1.29582	N0E3V7	25.2151	25.3481	23.0223	22.3286	25.2631	25.4811	25.418	24.9352		30.746	266740000	10		tr|N0E3V7|N0E3V7_9MICO Putative phosphoglycerate mutase related protein OS=Tetrasphaera elongata Lp2 GN=BN10_230017 PE=4 SV=1
	0.893071	-1.33496	N0E691	26.5557	27.8249	27.0148	24.391	28.0339	28.1497	27.4028	27.5398		23.557	1093800000	14		tr|N0E691|N0E691_9MICO Putative ribonuclease D OS=Tetrasphaera elongata Lp2 GN=BN10_810007 PE=4 SV=1
	0.921317	-1.34837	N0E0H2	21.5654	23.9388	23.9737	25.0138	24.7601	25.3459	25.0511	24.7281		10.054	111620000	9		tr|N0E0H2|N0E0H2_9MICO Glycerol-3-phosphate transporter subunit ATP-binding component of ABC superfamily OS=Tetrasphaera elongata Lp2 GN=ugpC PE=4 SV=1
	1.47217	-1.41732	N0E6G0	25.295	23.314	25.364	24.296	25.9879	26.483	25.6182	25.8491		32.066	397810000	15		tr|N0E6G0|N0E6G0_9MICO Uncharacterized protein OS=Tetrasphaera elongata Lp2 GN=BN10_950005 PE=4 SV=1
	1.36289	-1.52556	N0DZP8	23.091	25.8763	24.2438	24.3263	26.0566	25.3986	26.0026	26.182		81.52	341410000	15		tr|N0DZP8|N0DZP8_9MICO Chromosome partitioning protein transcriptional regulator OS=Tetrasphaera elongata Lp2 GN=parA PE=4 SV=1
	1.3794	-1.65301	N0E0Q9	23.1352	24.6145	21.5759	23.2633	24.6571	24.5014	25.2228	24.8198		18.532	132150000	10		tr|N0E0Q9|N0E0Q9_9MICO Uncharacterized protein OS=Tetrasphaera elongata Lp2 GN=BN10_1570001 PE=4 SV=1
	1.25173	-1.9968	N0DZ56	24.9609	26.9972	25.9999	23.0552	27.396	27.2989	27.2089	27.0967		45.448	745580000	15		tr|N0DZ56|N0DZ56_9MICO Uncharacterized protein OS=Tetrasphaera elongata Lp2 GN=BN10_450009 PE=4 SV=1
	1.55138	-2.28601	N0E0M2	23.6026	25.3488	21.5538	23.0931	25.3935	26.0408	25.5807	25.7273		57.768	247350000	16		tr|N0E0M2|N0E0M2_9MICO Putative transcriptional regulator OS=Tetrasphaera elongata Lp2 GN=BN10_580007 PE=4 SV=1
	1.49702	-2.39466	N0E4R1	24.1952	24.4578	23.4427	24.6343	28.1035	27.8741	25.3323	24.9988		11.378	777160000	13		tr|N0E4R1|N0E4R1_9MICO 50S ribosomal protein L34 OS=Tetrasphaera elongata Lp2 GN=rpmH PE=3 SV=1

## Sheet: E. coli Quantitation Results
Significant	-log p	Difference (log2 anoxic/oxic)	Majority protein IDs	3H_1	3H_2	3H_3	3H_4	Ox_1	Ox_2	Ox_3	Ox_4		Score	Intensity	MS/MS Count		Fasta headers
+	3.40201	6.25769	P0A9H3	32.1476	31.5026	31.4925	28.9267	24.5213	25.9485	25.099	23.47		323.31	8795800000	110		sp|P0A9H3|LDCI_ECOLI Lysine decarboxylase, inducible OS=Escherichia coli (strain K12) GN=cadA PE=1 SV=1
+	4.31506	5.50301	P64463	30.6118	29.8622	30.2616	28.2796	24.2857	23.8633	24.5272	24.3271		263.31	3330000000	45		sp|P64463|YDFZ_ECOLI Putative selenoprotein YdfZ OS=Escherichia coli (strain K12) GN=ydfZ PE=1 SV=1
+	5.05973	5.30756	P08201	29.9963	29.5561	29.5621	30.595	25.2296	23.8323	24.5958	24.8216		323.31	3265900000	84		sp|P08201|NIRB_ECOLI Nitrite reductase (NADH) large subunit OS=Escherichia coli (strain K12) GN=nirB PE=3 SV=4
+	4.29039	5.29067	P78067	29.7597	28.9316	28.878	30.453	24.1477	25.1882	23.4704	24.0532		235.85	2326900000	46		sp|P78067|YNJE_ECOLI Thiosulfate sulfurtransferase YnjE OS=Escherichia coli (strain K12) GN=ynjE PE=1 SV=2
+	3.19209	4.40061	P18775	28.8195	28.6725	28.6068	28.725	22.7922	23.6726	25.8883	24.8683		152.24	1313200000	40		sp|P18775|DMSA_ECOLI Dimethyl sulfoxide reductase DmsA OS=Escherichia coli (strain K12) GN=dmsA PE=1 SV=2
+	6.1523	3.65746	P0AC47	28.3128	27.982	28.0815	28.2704	24.963	24.3445	24.3733	24.336		90.846	965140000	21		sp|P0AC47|FRDB_ECOLI Fumarate reductase iron-sulfur subunit OS=Escherichia coli (strain K12) GN=frdB PE=1 SV=2
+	2.73942	3.6439	P0A9I8	28.9387	28.6093	29.0589	26.2219	24.8692	24.7156	24.1374	24.531		57.781	1237200000	18		sp|P0A9I8|NIRD_ECOLI Nitrite reductase (NADH) small subunit OS=Escherichia coli (strain K12) GN=nirD PE=1 SV=1
+	5.40635	3.61712	P0AEL3	28.1942	28.1979	27.8389	28.7462	24.2433	24.7627	24.7917	24.7112		52.072	935120000	17		sp|P0AEL3|FEOA_ECOLI Ferrous iron transport protein A OS=Escherichia coli (strain K12) GN=feoA PE=1 SV=1
+	3.71783	3.57136	P0AFW2	27.8602	27.6179	27.1582	28.3386	24.8064	23.2906	24.7454	23.847		38.94	575030000	9		sp|P0AFW2|RMF_ECOLI Ribosome modulation factor OS=Escherichia coli (strain K12) GN=rmf PE=1 SV=1
+	2.1904	3.56765	P36560	29.0594	31.2112	29.676	28.8255	25.8943	25.132	25.3422	28.1331		29.349	3103200000	23		sp|P36560|ASR_ECOLI Acid shock protein OS=Escherichia coli (strain K12) GN=asr PE=1 SV=3
+	4.23377	3.56307	P18776	28.3695	27.8611	28.0885	28.5027	24.0648	24.4905	24.4337	25.5804		41.418	871830000	25		sp|P18776|DMSB_ECOLI Anaerobic dimethyl sulfoxide reductase chain B OS=Escherichia coli (strain K12) GN=dmsB PE=1 SV=4
+	2.74613	3.5457	P0A9S5	30.5224	29.5483	29.9307	27.501	26.1513	25.7594	25.8103	25.5987		116.87	3001900000	29		sp|P0A9S5|GLDA_ECOLI Glycerol dehydrogenase OS=Escherichia coli (strain K12) GN=gldA PE=1 SV=1
+	5.71857	3.46531	P0AC38	31.0069	31.0536	31.0422	30.5025	27.1179	27.7189	27.2933	27.6137		323.31	6526500000	112		sp|P0AC38|ASPA_ECOLI Aspartate ammonia-lyase OS=Escherichia coli (strain K12) GN=aspA PE=1 SV=1
+	2.88738	3.14942	P33650	28.2446	28.2606	28.2712	28.1402	24.7528	26.3499	23.7342	25.482		94.047	971220000	27		sp|P33650|FEOB_ECOLI Ferrous iron transport protein B OS=Escherichia coli (strain K12) GN=feoB PE=1 SV=1
+	5.56257	2.97801	P68066	33.6275	33.2854	33.5373	32.9462	30.1342	30.3424	30.4827	30.525		323.31	37941000000	304		sp|P68066|GRCA_ECOLI Autonomous glycyl radical cofactor OS=Escherichia coli (strain K12) GN=grcA PE=1 SV=1
+	3.77375	2.8131	P09152	27.2657	27.2045	26.9466	26.2598	23.8832	23.8493	24.855	23.8367		66.021	371550000	18		sp|P09152|NARG_ECOLI Respiratory nitrate reductase 1 alpha chain OS=Escherichia coli (strain K12) GN=narG PE=1 SV=4
+	3.96662	2.50249	P14407	26.6773	26.3862	26.7475	26.9892	24.7605	23.8595	23.7013	24.4691		25.103	378920000	11		sp|P14407|FUMB_ECOLI Fumarate hydratase class I, anaerobic OS=Escherichia coli (strain K12) GN=fumB PE=1 SV=2
+	4.58093	2.38067	Q59385	31.3529	30.6865	30.5728	31.0841	28.5052	28.3575	28.4744	28.8366		247.38	6170900000	68		sp|Q59385|COPA_ECOLI Copper-exporting P-type ATPase A OS=Escherichia coli (strain K12) GN=copA PE=1 SV=4
+	2.69206	2.37307	P33590	27.1244	27.0752	26.6701	27.7288	24.5363	25.5785	25.2297	23.7617		30.776	408260000	14		sp|P33590|NIKA_ECOLI Nickel-binding periplasmic protein OS=Escherichia coli (strain K12) GN=nikA PE=1 SV=1
+	2.38118	2.25046	P11349	26.0078	26.5435	24.8663	25.9479	23.3458	22.7327	23.8882	24.3969		12.061	243390000	6		sp|P11349|NARH_ECOLI Respiratory nitrate reductase 1 beta chain OS=Escherichia coli (strain K12) GN=narH PE=1 SV=3
+	2.00512	2.05348	P0ADX7	27.2892	27.8363	27.8861	27.2164	25.8261	25.8349	26.3724	23.9808		84.755	753090000	21		sp|P0ADX7|YHHA_ECOLI Uncharacterized protein YhhA OS=Escherichia coli (strain K12) GN=yhhA PE=3 SV=1
+	1.84298	2.00845	P0AD33	32.0616	31.7006	31.7349	29.5067	29.3208	29.1949	29.1193	29.3349		132.78	12130000000	62		sp|P0AD33|YFCZ_ECOLI UPF0381 protein YfcZ OS=Escherichia coli (strain K12) GN=yfcZ PE=3 SV=1
+	2.4543	1.98378	P32162	26.4879	26.2531	26.5993	26.7416	23.7248	24.8723	24.0089	25.5409		97.49	299130000	10		sp|P32162|YIIS_ECOLI UPF0381 protein YiiS OS=Escherichia coli (strain K12) GN=yiiS PE=1 SV=1
+	5.6111	1.91406	P0AAC0	30.1459	30.6013	30.3687	30.2725	28.5613	28.3312	28.4899	28.3498		277.41	5136600000	73		sp|P0AAC0|USPE_ECOLI Universal stress protein E OS=Escherichia coli (strain K12) GN=uspE PE=1 SV=2
+	2.26494	1.91261	P76170	25.9494	25.7489	25.7081	26.7259	24.0299	23.7749	25.2173	23.4598		41.326	194370000	8		sp|P76170|YNFB_ECOLI UPF0482 protein YnfB OS=Escherichia coli (strain K12) GN=ynfB PE=1 SV=1
+	2.18015	1.90169	P0A7C6	27.4858	26.7082	26.9032	27.6458	26.1377	24.826	25.793	24.3797		64.242	623110000	15		sp|P0A7C6|PEPE_ECOLI Peptidase E OS=Escherichia coli (strain K12) GN=pepE PE=1 SV=1
+	4.76685	1.8161	P00363	30.7287	30.343	30.5639	30.8897	28.6275	28.9151	29.0109	28.7074		323.31	6641700000	128		sp|P00363|FRDA_ECOLI Fumarate reductase flavoprotein subunit OS=Escherichia coli (strain K12) GN=frdA PE=1 SV=3
+	5.76097	1.73651	P63284	31.1358	30.9048	30.793	31.0263	29.1748	29.1871	29.4049	29.1471		323.31	7872800000	173		sp|P63284|CLPB_ECOLI Chaperone protein ClpB OS=Escherichia coli (strain K12) GN=clpB PE=1 SV=1
+	4.53879	1.6864	P09373	35.5834	35.0497	34.9633	35.3882	33.652	33.5533	33.4775	33.5561		323.31	169200000000	1383		sp|P09373|PFLB_ECOLI Formate acetyltransferase 1 OS=Escherichia coli (strain K12) GN=pflB PE=1 SV=2
+	1.92088	1.67329	P0AAN3	26.3157	25.8687	26.2657	26.7461	24.6036	23.9921	24.044	25.8634		57.997	243280000	15		sp|P0AAN3|HYPB_ECOLI Hydrogenase isoenzymes nickel incorporation protein HypB OS=Escherichia coli (strain K12) GN=hypB PE=1 SV=1
+	2.04442	1.56015	P26649	25.736	26.2167	26.2553	25.9955	23.9102	24.4764	25.6077	23.9687		47.582	223980000	10		sp|P26649|GLGS_ECOLI Surface composition regulator OS=Escherichia coli (strain K12) GN=glgS PE=1 SV=1
+	4.12914	1.50313	P36659	28.368	28.322	27.8032	28.4972	26.6446	26.7352	26.8022	26.7959		38.677	1165400000	19		sp|P36659|CBPA_ECOLI Curved DNA-binding protein OS=Escherichia coli (strain K12) GN=cbpA PE=1 SV=2
+	5.40288	1.50048	P0A8G6	32.2392	31.8154	32.0671	32.1146	30.4787	30.5487	30.6318	30.5752		323.31	19437000000	265		sp|P0A8G6|NQOR_ECOLI NAD(P)H dehydrogenase (quinone) OS=Escherichia coli (strain K12) GN=wrbA PE=1 SV=2
+	4.33744	1.43602	P12758	29.9373	29.9205	29.6706	30.0372	28.7205	28.433	28.1682	28.4998		221.93	4092600000	103		sp|P12758|UDP_ECOLI Uridine phosphorylase OS=Escherichia coli (strain K12) GN=udp PE=1 SV=3
+	2.59105	1.36666	P29745	30.0936	29.6958	29.7877	30.8583	28.7651	28.7006	28.9447	28.5583		323.31	4756000000	95		sp|P29745|PEPT_ECOLI Peptidase T OS=Escherichia coli (strain K12) GN=pepT PE=1 SV=2
+	1.85141	1.35759	P0A821	28.1456	27.931	27.7949	26.4664	26.3531	26.2086	26.4332	25.9126		158.4	750460000	31		sp|P0A821|SELA_ECOLI L-seryl-tRNA(Sec) selenium transferase OS=Escherichia coli (strain K12) GN=selA PE=1 SV=1
+	4.53213	1.3307	P63417	30.6318	30.94	30.8728	30.4625	29.5143	29.3889	29.3707	29.3104		199.39	7684100000	69		sp|P63417|YHBS_ECOLI Uncharacterized N-acetyltransferase YhbS OS=Escherichia coli (strain K12) GN=yhbS PE=3 SV=1
+	4.92038	1.29356	P0ABT2	30.9209	30.5067	30.6699	30.7044	29.3011	29.5208	29.4534	29.3524		323.31	7657300000	141		sp|P0ABT2|DPS_ECOLI DNA protection during starvation protein OS=Escherichia coli (strain K12) GN=dps PE=1 SV=2
+	2.33772	1.20806	P39177	31.2362	31.1115	31.1579	30.2509	29.999	29.5197	29.4296	29.976		323.31	9618200000	105		sp|P39177|USPG_ECOLI Universal stress protein G OS=Escherichia coli (strain K12) GN=uspG PE=1 SV=2
+	3.9252	1.14566	Q46856	29.4368	29.4765	29.3329	28.9864	28.0278	28.2736	28.0666	28.282		151.53	2958000000	59		sp|Q46856|YQHD_ECOLI Alcohol dehydrogenase YqhD OS=Escherichia coli (strain K12) GN=yqhD PE=1 SV=1
+	6.16006	1.13342	P0A731	25.6593	25.6554	25.6378	25.7201	24.6121	24.3878	24.5667	24.5723		6.9648	420370000	10		sp|P0A731|MGSA_ECOLI Methylglyoxal synthase OS=Escherichia coli (strain K12) GN=mgsA PE=1 SV=1
+	1.82694	1.12345	P0ADF6	27.8931	27.8526	27.9393	29.149	27.0213	27.3724	26.8455	27.1011		97.134	1367200000	38		sp|P0ADF6|EDD_ECOLI Phosphogluconate dehydratase OS=Escherichia coli (strain K12) GN=edd PE=2 SV=1
+	2.7825	1.06761	P26646	29.896	29.4701	29.6095	30.3568	28.8184	28.7758	28.7703	28.6975		239.86	4126400000	67		sp|P26646|ACUI_ECOLI Probable acrylyl-CoA reductase AcuI OS=Escherichia coli (strain K12) GN=acuI PE=1 SV=1
+	2.43833	1.01193	P0AGD1	28.5053	29.0303	28.942	28.6743	27.5714	28.102	28.0667	27.3641		67.748	2180700000	63		sp|P0AGD1|SODC_ECOLI Superoxide dismutase [Cu-Zn] OS=Escherichia coli (strain K12) GN=sodC PE=1 SV=1
+	1.66518	0.992014	P76402	28.5999	27.5383	28.226	28.832	26.8829	27.4155	27.6122	27.3175		89.534	1609100000	51		sp|P76402|YEGP_ECOLI UPF0339 protein YegP OS=Escherichia coli (strain K12) GN=yegP PE=1 SV=2
+	2.19864	0.982152	P31658	27.2798	26.8592	27.2434	27.9755	26.4884	26.2169	26.3278	26.3963		51.617	773350000	20		sp|P31658|HCHA_ECOLI Molecular chaperone Hsp31 and glyoxalase 3 OS=Escherichia coli (strain K12) GN=hchA PE=1 SV=3
+	6.94949	0.969278	P0AEZ9	30.4932	30.3976	30.4681	30.3868	29.4528	29.4523	29.5286	29.4349		211.85	6799000000	99		sp|P0AEZ9|MOAB_ECOLI Molybdenum cofactor biosynthesis protein B OS=Escherichia coli (strain K12) GN=moaB PE=1 SV=2
+	3.04957	0.966848	P0AB14	30.3983	30.157	30.2595	30.4983	29.0438	29.2149	29.5454	29.6415		175.65	6380300000	79		sp|P0AB14|YCCJ_ECOLI Uncharacterized protein YccJ OS=Escherichia coli (strain K12) GN=yccJ PE=1 SV=1
+	4.2573	0.963943	P52643	31.4037	31.3175	31.2734	31.6236	30.5854	30.4512	30.4066	30.3193		323.31	13285000000	188		sp|P52643|LDHD_ECOLI D-lactate dehydrogenase OS=Escherichia coli (strain K12) GN=ldhA PE=1 SV=1
+	2.26528	0.941636	P76193	27.0493	27.2468	27.0472	27.3605	26.3041	26.5117	26.4951	25.6262		51.705	690950000	21		sp|P76193|YNHG_ECOLI Probable L,D-transpeptidase YnhG OS=Escherichia coli (strain K12) GN=ynhG PE=1 SV=1
+	2.22294	0.917314	P07762	28.4951	28.5438	28.7163	29.4001	27.7133	27.7943	28.0147	27.9637		154.82	2129900000	64		sp|P07762|GLGB_ECOLI 1,4-alpha-glucan branching enzyme GlgB OS=Escherichia coli (strain K12) GN=glgB PE=1 SV=1
+	1.89301	0.884817	P0ABH9	28.2743	28.454	27.7297	28.7892	27.6068	27.5326	27.5003	27.0682		119.59	1328100000	41		sp|P0ABH9|CLPA_ECOLI ATP-dependent Clp protease ATP-binding subunit ClpA OS=Escherichia coli (strain K12) GN=clpA PE=1 SV=1
+	1.90902	0.875542	P0AET8	28.4213	28.2072	28.1176	29.1439	27.78	27.5677	27.3765	27.6637		76.075	1772000000	32		sp|P0AET8|HDHA_ECOLI 7-alpha-hydroxysteroid dehydrogenase OS=Escherichia coli (strain K12) GN=hdhA PE=1 SV=1
+	3.37419	0.832495	P0A8N5	29.6638	29.1669	29.3875	29.4245	28.6295	28.4785	28.4766	28.7281		254.91	3320200000	87		sp|P0A8N5|SYK2_ECOLI Lysine--tRNA ligase, heat inducible OS=Escherichia coli (strain K12) GN=lysU PE=1 SV=2
+	1.78298	0.813433	P0A905	26.7943	27.0361	27.5219	27.7844	26.399	26.3759	26.3368	26.7713		97.061	729590000	31		sp|P0A905|SLYB_ECOLI Outer membrane lipoprotein SlyB OS=Escherichia coli (strain K12) GN=slyB PE=2 SV=1
+	2.8112	0.813076	P25665	32.8404	32.3426	32.1812	32.639	31.7053	31.6993	31.7025	31.6436		323.31	30352000000	402		sp|P25665|METE_ECOLI 5-methyltetrahydropteroyltriglutamate--homocysteine methyltransferase OS=Escherichia coli (strain K12) GN=metE PE=1 SV=6
+	3.43506	0.803688	P69910	33.7348	33.2625	33.3173	33.5165	32.6284	32.7334	32.67	32.5846		323.31	59409000000	586		sp|P69910|DCEB_ECOLI Glutamate decarboxylase beta OS=Escherichia coli (strain K12) GN=gadB PE=1 SV=1
+	2.17155	0.803378	P06721	28.6805	28.3244	28.4374	29.1588	28.0572	27.8135	27.7747	27.7421		135.73	2042200000	60		sp|P06721|METC_ECOLI Cystathionine beta-lyase MetC OS=Escherichia coli (strain K12) GN=metC PE=1 SV=1
+	3.09232	0.767951	P0AED0	32.1055	31.8695	32.0976	31.7342	31.1094	31.0551	31.4304	31.1401		307.84	21757000000	183		sp|P0AED0|USPA_ECOLI Universal stress protein A OS=Escherichia coli (strain K12) GN=uspA PE=1 SV=2
+	3.97755	0.752862	P16700	32.0832	32.2206	32.3435	32.1573	31.3265	31.4162	31.6247	31.4256		323.31	24314000000	340		sp|P16700|CYSP_ECOLI Thiosulfate-binding protein OS=Escherichia coli (strain K12) GN=cysP PE=1 SV=1
+	1.64042	0.749054	P0A7D4	34.0918	33.5869	33.4074	34.2874	33.4406	33.1465	32.9763	32.8139		323.31	79942000000	694		sp|P0A7D4|PURA_ECOLI Adenylosuccinate synthetase OS=Escherichia coli (strain K12) GN=purA PE=1 SV=2
+	2.44964	0.744081	P29217	28.6704	28.3771	28.6246	29.1157	27.9251	27.8509	28.0715	27.9642		212.26	2228500000	44		sp|P29217|YCEH_ECOLI UPF0502 protein YceH OS=Escherichia coli (strain K12) GN=yceH PE=1 SV=3
+	4.12227	0.742687	P0AES9	30.4106	30.389	30.5242	30.2156	29.6167	29.7523	29.6611	29.5385		129.89	7089600000	60		sp|P0AES9|HDEA_ECOLI Acid stress chaperone HdeA OS=Escherichia coli (strain K12) GN=hdeA PE=1 SV=1
+	1.9586	0.742174	P0ACY3	29.3958	29.5502	29.109	30.0779	28.8494	28.7992	28.7784	28.7371		293.58	3847600000	123		sp|P0ACY3|YEAG_ECOLI Uncharacterized protein YeaG OS=Escherichia coli (strain K12) GN=yeaG PE=3 SV=1
+	2.28929	0.735902	P28304	29.739	29.7413	29.577	30.3353	29.1985	29.0554	29.0365	29.1588		241.18	4757900000	109		sp|P28304|QOR1_ECOLI Quinone oxidoreductase 1 OS=Escherichia coli (strain K12) GN=qorA PE=1 SV=1
+	2.24885	0.724988	P0ABF6	28.7281	28.7112	28.5793	29.3355	28.1428	28.0156	28.1265	28.1692		159.68	2333500000	37		sp|P0ABF6|CDD_ECOLI Cytidine deaminase OS=Escherichia coli (strain K12) GN=cdd PE=1 SV=1
+	3.10904	0.684986	P31142	28.9931	28.8953	28.9508	29.3089	28.4476	28.1895	28.4245	28.3466		130.86	2669000000	41		sp|P31142|THTM_ECOLI 3-mercaptopyruvate sulfurtransferase OS=Escherichia coli (strain K12) GN=sseA PE=1 SV=3
+	2.30845	0.678337	P0ADA1	25.7001	25.5918	25.9861	25.8044	24.7597	25.3616	25.2345	25.0132		14.738	291310000	12		sp|P0ADA1|TESA_ECOLI Acyl-CoA thioesterase I OS=Escherichia coli (strain K12) GN=tesA PE=1 SV=1
+	2.71788	0.674409	P05793	27.1803	27.1667	27.3335	27.2012	26.8492	26.2793	26.437	26.6183		72.927	683380000	22		sp|P05793|ILVC_ECOLI Ketol-acid reductoisomerase OS=Escherichia coli (strain K12) GN=ilvC PE=1 SV=4
+	1.9674	0.626276	P0A7B8	28.6603	28.178	28.2251	28.525	27.6893	28.0955	27.8067	27.4918		122.58	1916700000	53		sp|P0A7B8|HSLV_ECOLI ATP-dependent protease subunit HslV OS=Escherichia coli (strain K12) GN=hslV PE=1 SV=2
+	2.16332	0.600789	P64490	29.0617	28.7455	28.6952	29.2779	28.2746	28.2816	28.3051	28.5158		73.883	2727100000	44		sp|P64490|YOAC_ECOLI Uncharacterized protein YoaC OS=Escherichia coli (strain K12) GN=yoaC PE=4 SV=2
+	3.45709	0.590436	P61316	31.2743	31.2598	31.3729	31.5823	30.722	30.7677	30.8765	30.7614		323.31	14053000000	252		sp|P61316|LOLA_ECOLI Outer-membrane lipoprotein carrier protein OS=Escherichia coli (strain K12) GN=lolA PE=1 SV=1
+	2.1478	0.580521	P0A6Y8	35.1754	35.1606	35.2474	34.6307	34.4847	34.4304	34.4268	34.5501		323.31	190180000000	1215		sp|P0A6Y8|DNAK_ECOLI Chaperone protein DnaK OS=Escherichia coli (strain K12) GN=dnaK PE=1 SV=2
+	3.66964	0.57644	P0A6Z3	30.6129	30.5429	30.4585	30.7859	30.0028	30.0842	30.0198	29.9875		323.31	8181300000	188		sp|P0A6Z3|HTPG_ECOLI Chaperone protein HtpG OS=Escherichia coli (strain K12) GN=htpG PE=1 SV=1
+	4.51794	0.553279	P46853	29.5792	29.5317	29.6445	29.6885	29.0957	29.1281	29.0397	28.9673		155.06	4165000000	116		sp|P46853|YHHX_ECOLI Uncharacterized oxidoreductase YhhX OS=Escherichia coli (strain K12) GN=yhhX PE=1 SV=1
+	2.46583	0.545562	P33362	29.1473	29.4526	29.6408	29.3419	28.8142	28.8318	29.0047	28.7495		215.18	3746900000	61		sp|P33362|YEHZ_ECOLI Glycine betaine-binding protein YehZ OS=Escherichia coli (strain K12) GN=yehZ PE=1 SV=1
+	3.09989	0.534512	P76561	26.0459	25.6545	25.7323	25.7968	25.2687	25.2717	25.3104	25.2407		27.383	287870000	9		sp|P76561|YPFH_ECOLI Esterase YpfH OS=Escherichia coli (strain K12) GN=ypfH PE=3 SV=2
+	2.15881	0.533316	P37194	30.604	30.5026	30.7064	30.9294	30.1282	30.4309	30.014	30.036		226.19	8900200000	85		sp|P37194|SLP_ECOLI Outer membrane protein slp OS=Escherichia coli (strain K12) GN=slp PE=1 SV=1
+	3.21792	0.532266	P0AD59	30.3318	30.6419	30.5659	30.5533	30.0118	29.9912	30.0924	29.8684		159.64	8267000000	107		sp|P0AD59|IVY_ECOLI Inhibitor of vertebrate lysozyme OS=Escherichia coli (strain K12) GN=ivy PE=1 SV=1
+	1.74205	0.524899	P0A6H5	28.7044	28.3244	28.2308	28.9093	28.0716	27.9259	28.0601	28.0117		200.25	1999600000	64		sp|P0A6H5|HSLU_ECOLI ATP-dependent protease ATPase subunit HslU OS=Escherichia coli (strain K12) GN=hslU PE=1 SV=1
+	2.27704	0.509966	P23836	27.8115	27.7839	27.6147	28.0379	27.4131	27.4221	27.3032	27.0698		84.628	1196100000	35		sp|P23836|PHOP_ECOLI Transcriptional regulatory protein PhoP OS=Escherichia coli (strain K12) GN=phoP PE=1 SV=1
+	1.98466	0.509084	P0ADP9	27.4032	27.7086	27.6212	27.6205	27.3946	26.9937	26.8129	27.116		78.49	1038300000	24		sp|P0ADP9|YIHD_ECOLI Protein YihD OS=Escherichia coli (strain K12) GN=yihD PE=1 SV=1
+	3.97194	0.50209	P37689	33.2696	33.2225	33.3008	33.4243	32.7534	32.8266	32.8916	32.7372		323.31	58365000000	528		sp|P37689|GPMI_ECOLI 2,3-bisphosphoglycerate-independent phosphoglycerate mutase OS=Escherichia coli (strain K12) GN=gpmI PE=1 SV=1
+	1.90948	0.492519	P0A8M3	30.5785	30.8475	30.6639	31.1869	30.3576	30.3076	30.238	30.4035		323.31	9731100000	237		sp|P0A8M3|SYT_ECOLI Threonine--tRNA ligase OS=Escherichia coli (strain K12) GN=thrS PE=1 SV=1
+	2.80065	0.492242	P37902	31.53	31.6477	31.7848	31.5125	30.9715	31.1993	31.261	31.0742		323.31	17775000000	287		sp|P37902|GLTI_ECOLI Glutamate/aspartate periplasmic-binding protein OS=Escherichia coli (strain K12) GN=gltI PE=1 SV=2
+	3.70386	0.467697	P0ADE6	30.0114	30.1204	29.8875	29.9824	29.5946	29.5845	29.4808	29.4711		189.32	5784000000	116		sp|P0ADE6|YGAU_ECOLI Uncharacterized protein YgaU OS=Escherichia coli (strain K12) GN=ygaU PE=1 SV=2
+	2.33463	0.462574	P37329	30.504	30.8216	30.7445	30.7001	29.9911	30.2795	30.3462	30.3031		301.52	10734000000	153		sp|P37329|MODA_ECOLI Molybdate-binding periplasmic protein OS=Escherichia coli (strain K12) GN=modA PE=1 SV=1
+	2.41532	0.461561	P0A796	33.4348	33.3252	33.4793	33.0483	32.8914	32.8933	32.8847	32.7719		323.31	60155000000	553		sp|P0A796|PFKA_ECOLI ATP-dependent 6-phosphofructokinase isozyme 1 OS=Escherichia coli (strain K12) GN=pfkA PE=1 SV=1
+	1.74401	0.459388	P22106	30.5674	30.4973	30.5153	31.0637	30.1488	30.1062	30.2457	30.3054		323.31	9041200000	173		sp|P22106|ASNB_ECOLI Asparagine synthetase B [glutamine-hydrolyzing] OS=Escherichia coli (strain K12) GN=asnB PE=1 SV=3
+	3.2985	0.447859	Q46857	30.194	29.935	30.1852	30.0073	29.67	29.615	29.6177	29.6274		105.5	5862000000	83		sp|Q46857|DKGA_ECOLI 2,5-diketo-D-gluconic acid reductase A OS=Escherichia coli (strain K12) GN=dkgA PE=1 SV=3
+	1.83578	0.416158	P0AEQ3	33.1104	33.4319	33.6159	33.2809	32.8622	32.9076	33.117	32.8875		323.31	60888000000	502		sp|P0AEQ3|GLNH_ECOLI Glutamine-binding periplasmic protein OS=Escherichia coli (strain K12) GN=glnH PE=1 SV=1
+	2.73355	0.408238	P0AE88	27.1359	27.092	27.2202	27.1764	26.7365	26.6278	26.9537	26.6736		123.85	832290000	34		sp|P0AE88|CPXR_ECOLI Transcriptional regulatory protein CpxR OS=Escherichia coli (strain K12) GN=cpxR PE=1 SV=1
+	2.88888	0.398757	P69811	31.8512	32.0616	31.9724	31.8165	31.5833	31.4417	31.469	31.6127		323.31	23067000000	238		sp|P69811|PTFAH_ECOLI Multiphosphoryl transfer protein OS=Escherichia coli (strain K12) GN=fruB PE=2 SV=1
+	1.64333	0.388318	P31455	27.6382	27.7576	27.8205	28.2028	27.5247	27.427	27.5335	27.3806		49.973	1279100000	24		sp|P31455|YIDR_ECOLI Uncharacterized protein YidR OS=Escherichia coli (strain K12) GN=yidR PE=4 SV=4
+	1.67247	0.383709	P0A867	30.7808	30.4575	30.4702	30.9331	30.3336	30.2905	30.3199	30.1627		258.05	9193000000	155		sp|P0A867|TALA_ECOLI Transaldolase A OS=Escherichia coli (strain K12) GN=talA PE=3 SV=1
+	2.38608	0.377032	P37692	27.0646	26.8045	26.8419	26.9149	26.4494	26.4428	26.5209	26.7046		26.645	644340000	22		sp|P37692|RFAF_ECOLI ADP-heptose--LPS heptosyltransferase 2 OS=Escherichia coli (strain K12) GN=rfaF PE=1 SV=1
+	1.74052	0.355964	P0AB80	29.5077	29.4765	29.4323	29.8403	29.2947	29.1442	29.0735	29.3204		154.49	4323900000	61		sp|P0AB80|ILVE_ECOLI Branched-chain-amino-acid aminotransferase OS=Escherichia coli (strain K12) GN=ilvE PE=1 SV=2
+	1.66927	0.344386	P15034	29.9978	29.9077	30.0594	30.4065	29.6838	29.7485	29.7744	29.7872		323.31	6217200000	105		sp|P15034|AMPP_ECOLI Xaa-Pro aminopeptidase OS=Escherichia coli (strain K12) GN=pepP PE=1 SV=2
+	1.76605	0.330731	P42620	26.7217	26.5756	26.5329	26.5663	26.1968	26.5438	26.1542	26.1788		34.013	518010000	18		sp|P42620|YQJG_ECOLI Glutathionyl-hydroquinone reductase YqjG OS=Escherichia coli (strain K12) GN=yqjG PE=1 SV=1
+	1.64032	0.311902	P52697	31.3824	31.3857	31.3593	31.7425	31.2497	31.0759	31.219	31.0776		323.31	16446000000	215		sp|P52697|6PGL_ECOLI 6-phosphogluconolactonase OS=Escherichia coli (strain K12) GN=pgl PE=1 SV=2
+	2.33434	0.293332	P76268	25.9842	25.7694	25.8103	25.9224	25.4709	25.642	25.5382	25.6619		35.886	340230000	12		sp|P76268|KDGR_ECOLI Transcriptional regulator KdgR OS=Escherichia coli (strain K12) GN=kdgR PE=1 SV=1
+	2.29154	0.270257	P0AG82	31.0604	31.1017	31.0327	31.1334	30.6858	30.7426	30.9397	30.8791		323.31	12848000000	262		sp|P0AG82|PSTS_ECOLI Phosphate-binding protein PstS OS=Escherichia coli (strain K12) GN=pstS PE=1 SV=1
+	2.08626	0.270047	P0A744	29.299	28.9827	29.1504	29.2122	28.8674	28.872	28.95	28.8748		112.01	3541800000	70		sp|P0A744|MSRA_ECOLI Peptide methionine sulfoxide reductase MsrA OS=Escherichia coli (strain K12) GN=msrA PE=1 SV=2
+	3.15977	0.229263	P17846	30.8175	30.7161	30.8371	30.7081	30.5743	30.5123	30.537	30.5382		323.31	10645000000	193		sp|P17846|CYSI_ECOLI Sulfite reductase [NADPH] hemoprotein beta-component OS=Escherichia coli (strain K12) GN=cysI PE=1 SV=4
+	2.35028	0.22508	P0A8L1	31.7082	31.6356	31.632	31.8121	31.5128	31.4531	31.3998	31.5219		323.31	20315000000	246		sp|P0A8L1|SYS_ECOLI Serine--tRNA ligase OS=Escherichia coli (strain K12) GN=serS PE=1 SV=1
+	2.72008	0.208324	P0C8J8	29.9365	29.9053	29.9328	29.9935	29.6999	29.7083	29.8381	29.6885		289.66	5962100000	136		sp|P0C8J8|GATZ_ECOLI D-tagatose-1,6-bisphosphate aldolase subunit GatZ OS=Escherichia coli (strain K12) GN=gatZ PE=1 SV=1
+	1.80499	0.196589	P23843	36.2352	36.2276	36.2212	36.2054	36.0162	35.9211	36.1915	35.9742		323.31	454970000000	1751		sp|P23843|OPPA_ECOLI Periplasmic oligopeptide-binding protein OS=Escherichia coli (strain K12) GN=oppA PE=1 SV=2
+	3.27415	0.163934	P0ABU0	30.6552	30.6947	30.6667	30.7464	30.5566	30.5081	30.5426	30.5		323.31	10335000000	149		sp|P0ABU0|MENB_ECOLI 1,4-dihydroxy-2-naphthoyl-CoA synthase OS=Escherichia coli (strain K12) GN=menB PE=1 SV=1
+	2.98812	0.122578	P21889	32.4553	32.441	32.4822	32.4003	32.308	32.3131	32.3104	32.357		323.31	35888000000	385		sp|P21889|SYD_ECOLI Aspartate--tRNA ligase OS=Escherichia coli (strain K12) GN=aspS PE=1 SV=1
+	2.32255	-0.136769	P05055	34.0361	33.9981	33.9809	34.1118	34.1978	34.175	34.1433	34.1578		323.31	117680000000	976		sp|P05055|PNP_ECOLI Polyribonucleotide nucleotidyltransferase OS=Escherichia coli (strain K12) GN=pnp PE=1 SV=3
+	2.45804	-0.177223	P0AFG8	35.046	34.9947	35.0741	34.9258	35.1431	35.2106	35.1668	35.2289		323.31	238350000000	1761		sp|P0AFG8|ODP1_ECOLI Pyruvate dehydrogenase E1 component OS=Escherichia coli (strain K12) GN=aceE PE=1 SV=2
+	1.89523	-0.187048	P0A7X6	29.8042	29.8208	29.9334	30.0021	30.1301	30.0578	30.0168	30.104		143.82	6607000000	116		sp|P0A7X6|RIMM_ECOLI Ribosome maturation factor RimM OS=Escherichia coli (strain K12) GN=rimM PE=1 SV=1
+	2.19881	-0.19445	P61889	33.2416	33.3499	33.3216	33.3061	33.5529	33.4583	33.5823	33.4035		323.31	71610000000	322		sp|P61889|MDH_ECOLI Malate dehydrogenase OS=Escherichia coli (strain K12) GN=mdh PE=1 SV=1
+	1.70031	-0.213064	P23869	31.5197	31.626	31.7167	31.7535	31.9603	31.7715	31.8202	31.9162		266.45	23835000000	180		sp|P23869|PPIB_ECOLI Peptidyl-prolyl cis-trans isomerase B OS=Escherichia coli (strain K12) GN=ppiB PE=1 SV=2
+	2.49264	-0.232827	P08244	31.3884	31.4524	31.4149	31.4717	31.6004	31.6826	31.7861	31.5895		319.04	19987000000	231		sp|P08244|PYRF_ECOLI Orotidine 5-phosphate decarboxylase OS=Escherichia coli (strain K12) GN=pyrF PE=1 SV=1
+	2.50009	-0.233947	P0A784	30.0256	29.9869	30.1191	30.0706	30.2863	30.3038	30.3708	30.1771		163.84	7578700000	133		sp|P0A784|ORN_ECOLI Oligoribonuclease OS=Escherichia coli (strain K12) GN=orn PE=1 SV=2
+	2.09564	-0.23863	P0AF12	29.4585	29.3498	29.3037	29.3935	29.6512	29.7424	29.5104	29.5558		323.31	4815300000	78		sp|P0AF12|MTNN_ECOLI 5-methylthioadenosine/S-adenosylhomocysteine nucleosidase OS=Escherichia coli (strain K12) GN=mtnN PE=1 SV=1
+	2.59425	-0.244338	P23003	28.5294	28.566	28.4081	28.4272	28.7047	28.7749	28.7783	28.6502		176.43	2617500000	53		sp|P23003|TRMA_ECOLI tRNA/tmRNA (uracil-C(5))-methyltransferase OS=Escherichia coli (strain K12) GN=trmA PE=1 SV=1
+	1.75506	-0.250204	P0A6B7	32.1499	32.1756	32.169	31.953	32.241	32.464	32.4495	32.294		323.31	32267000000	381		sp|P0A6B7|ISCS_ECOLI Cysteine desulfurase IscS OS=Escherichia coli (strain K12) GN=iscS PE=1 SV=1
+	1.70476	-0.253126	P75949	28.3322	28.1256	28.3681	28.3986	28.5686	28.4123	28.6125	28.6438		105.91	2321300000	58		sp|P75949|NAGZ_ECOLI Beta-hexosaminidase OS=Escherichia coli (strain K12) GN=nagZ PE=1 SV=1
+	1.82152	-0.25904	P60624	33.4215	33.2649	33.59	33.4744	33.7047	33.6119	33.6799	33.7904		323.31	80360000000	385		sp|P60624|RL24_ECOLI 50S ribosomal protein L24 OS=Escherichia coli (strain K12) GN=rplX PE=1 SV=2
+	1.82303	-0.277332	P0A7J3	32.7672	32.797	32.5232	32.6774	33.0695	33.0268	32.8197	32.9579		323.31	48498000000	277		sp|P0A7J3|RL10_ECOLI 50S ribosomal protein L10 OS=Escherichia coli (strain K12) GN=rplJ PE=1 SV=2
+	1.99367	-0.278894	P15640	31.7662	31.8136	31.8446	31.9971	32.0616	32.2341	32.2276	32.0138		323.31	27307000000	406		sp|P15640|PUR2_ECOLI Phosphoribosylamine--glycine ligase OS=Escherichia coli (strain K12) GN=purD PE=1 SV=2
+	2.65302	-0.31213	P0AG67	35.1283	35.1787	35.2571	34.988	35.4157	35.5184	35.4256	35.4409		323.31	275640000000	1678		sp|P0AG67|RS1_ECOLI 30S ribosomal protein S1 OS=Escherichia coli (strain K12) GN=rpsA PE=1 SV=1
+	2.45998	-0.314139	P0A7T3	32.7244	32.7615	32.4644	32.6404	32.9754	32.9877	32.9279	32.9562		323.31	48718000000	355		sp|P0A7T3|RS16_ECOLI 30S ribosomal protein S16 OS=Escherichia coli (strain K12) GN=rpsP PE=1 SV=1
+	1.9261	-0.315969	P0A7S9	33.41	33.1807	33.1551	33.0204	33.4259	33.6013	33.4893	33.5135		323.31	71936000000	384		sp|P0A7S9|RS13_ECOLI 30S ribosomal protein S13 OS=Escherichia coli (strain K12) GN=rpsM PE=1 SV=2
+	1.73617	-0.320927	P37330	29.0475	29.0398	29.0594	28.6683	29.3623	29.2671	29.227	29.2423		235.23	3702400000	81		sp|P37330|MASZ_ECOLI Malate synthase G OS=Escherichia coli (strain K12) GN=glcB PE=1 SV=3
+	1.66548	-0.334508	P20099	27.7133	27.5378	27.565	27.5251	27.8467	28.0862	28.0747	27.6715		74.644	1455800000	37		sp|P20099|BISC_ECOLI Biotin sulfoxide reductase OS=Escherichia coli (strain K12) GN=bisC PE=1 SV=3
+	1.99087	-0.33486	P0C018	34.0949	33.8871	34.187	33.9448	34.1992	34.3534	34.4423	34.4584		323.31	125880000000	480		sp|P0C018|RL18_ECOLI 50S ribosomal protein L18 OS=Escherichia coli (strain K12) GN=rplR PE=1 SV=1
+	2.32925	-0.359066	P0A912	28.7589	28.5121	28.7204	28.7472	28.914	29.1802	29.0893	28.9914		170.84	3066800000	69		sp|P0A912|PAL_ECOLI Peptidoglycan-associated lipoprotein OS=Escherichia coli (strain K12) GN=pal PE=1 SV=1
+	1.90688	-0.375388	P0A9X4	29.8036	29.9894	29.6002	29.7836	30.3619	30.1471	30.0216	30.1478		250.55	6558200000	114		sp|P0A9X4|MREB_ECOLI Rod shape-determining protein MreB OS=Escherichia coli (strain K12) GN=mreB PE=1 SV=1
+	2.11844	-0.375646	P0A7X3	33.7066	33.8239	33.7789	33.6228	34.0232	34.1812	33.924	34.3064		323.31	104470000000	394		sp|P0A7X3|RS9_ECOLI 30S ribosomal protein S9 OS=Escherichia coli (strain K12) GN=rpsI PE=1 SV=2
+	2.0702	-0.385596	P0ADZ0	32.2554	32.3806	32.6237	32.3881	32.6504	32.7575	32.824	32.9583		323.31	41792000000	361		sp|P0ADZ0|RL23_ECOLI 50S ribosomal protein L23 OS=Escherichia coli (strain K12) GN=rplW PE=1 SV=1
+	3.58195	-0.399779	P0A7R9	33.3843	33.4982	33.5584	33.3507	33.8216	33.8874	33.8745	33.8073		323.31	86770000000	533		sp|P0A7R9|RS11_ECOLI 30S ribosomal protein S11 OS=Escherichia coli (strain K12) GN=rpsK PE=1 SV=2
+	1.68139	-0.408357	P64581	30.5259	30.0513	30.2943	30.4843	30.551	30.8742	30.7154	30.8486		233.85	9812700000	104		sp|P64581|YQJD_ECOLI Uncharacterized protein YqjD OS=Escherichia coli (strain K12) GN=yqjD PE=1 SV=1
+	3.14504	-0.413829	P76177	28.6395	28.5801	28.7033	28.5016	29.1055	28.8995	28.9808	29.0941		154.82	3015600000	101		sp|P76177|YDGH_ECOLI Protein YdgH OS=Escherichia coli (strain K12) GN=ydgH PE=1 SV=1
+	1.72368	-0.420256	P0ABA0	27.8714	27.7103	27.8582	27.8431	28.2869	28.4403	28.3634	27.8734		100.29	1672300000	52		sp|P0ABA0|ATPF_ECOLI ATP synthase subunit b OS=Escherichia coli (strain K12) GN=atpF PE=1 SV=1
+	1.70457	-0.426145	P0A7L8	32.1611	32.2591	32.1	32.3607	32.6484	32.4871	32.4583	32.9917		323.31	36281000000	304		sp|P0A7L8|RL27_ECOLI 50S ribosomal protein L27 OS=Escherichia coli (strain K12) GN=rpmA PE=1 SV=2
+	1.74438	-0.449964	P0A7A7	26.4351	26.1257	26.2571	26.1328	26.6237	26.961	26.7699	26.396		87.686	589840000	26		sp|P0A7A7|PLSB_ECOLI Glycerol-3-phosphate acyltransferase OS=Escherichia coli (strain K12) GN=plsB PE=1 SV=2
+	1.99372	-0.475334	P51024	25.197	25.7323	25.739	25.6226	26.0223	26.047	26.081	26.0418		42.378	335310000	9		sp|P51024|YAIL_ECOLI Uncharacterized protein YaiL OS=Escherichia coli (strain K12) GN=yaiL PE=4 SV=2
+	2.19181	-0.482677	P0A6G3	26.5012	26.5127	26.5746	26.0994	26.7762	26.9466	26.9885	26.9074		55.774	694470000	17		sp|P0A6G3|PNCC_ECOLI Nicotinamide-nucleotide amidohydrolase PncC OS=Escherichia coli (strain K12) GN=pncC PE=1 SV=1
+	1.91228	-0.516098	P0A9X9	32.112	31.9596	32.0857	31.6765	32.3286	32.462	32.7796	32.3281		270.99	33175000000	203		sp|P0A9X9|CSPA_ECOLI Cold shock protein CspA OS=Escherichia coli (strain K12) GN=cspA PE=1 SV=2
+	1.91781	-0.520109	P0AG63	32.4748	32.75	32.8878	32.3599	32.9844	33.1516	33.3611	33.0558		323.31	53014000000	472		sp|P0AG63|RS17_ECOLI 30S ribosomal protein S17 OS=Escherichia coli (strain K12) GN=rpsQ PE=1 SV=2
+	2.45755	-0.568213	P0A7U7	33.7917	33.8311	34.1019	33.6049	34.3689	34.2917	34.3483	34.5935		323.31	123810000000	613		sp|P0A7U7|RS20_ECOLI 30S ribosomal protein S20 OS=Escherichia coli (strain K12) GN=rpsT PE=1 SV=2
+	1.94322	-0.575357	P06996	28.6395	28.0077	28.0373	28.2753	28.9103	28.6392	28.794	28.9177		232.41	2473100000	63		sp|P06996|OMPC_ECOLI Outer membrane protein C OS=Escherichia coli (strain K12) GN=ompC PE=1 SV=1
+	1.66135	-0.587447	P0A972	33.5198	32.9956	33.5005	33.0598	33.6058	33.8228	34.2206	33.7763		323.31	86108000000	380		sp|P0A972|CSPE_ECOLI Cold shock-like protein CspE OS=Escherichia coli (strain K12) GN=cspE PE=1 SV=2
+	2.19452	-0.588984	P61175	34.1238	33.9592	34.3192	33.6484	34.5339	34.6206	34.6171	34.6349		323.31	141880000000	588		sp|P61175|RL22_ECOLI 50S ribosomal protein L22 OS=Escherichia coli (strain K12) GN=rplV PE=1 SV=1
+	1.80373	-0.612689	P32099	26.2709	25.9015	25.7281	25.468	26.3781	26.5143	26.6295	26.2974		35.663	463230000	13		sp|P32099|LPLA_ECOLI Lipoate-protein ligase A OS=Escherichia coli (strain K12) GN=lplA PE=1 SV=3
+	2.14923	-0.632229	P0AAS0	26.3162	26.0722	26.1007	25.6225	26.7878	26.667	26.6909	26.4949		73.721	530830000	21		sp|P0AAS0|YLAC_ECOLI Inner membrane protein YlaC OS=Escherichia coli (strain K12) GN=ylaC PE=1 SV=2
+	1.78191	-0.641742	P09158	29.05	29.0472	29.2215	28.3725	29.4306	29.6657	29.6191	29.5428		79.344	4198700000	61		sp|P09158|SPEE_ECOLI Polyamine aminopropyltransferase OS=Escherichia coli (strain K12) GN=speE PE=1 SV=2
+	2.68047	-0.645631	P0ADW8	25.0098	25.1418	25.025	24.8146	25.3565	25.6461	25.7162	25.855		19.654	249010000	14		sp|P0ADW8|YHEV_ECOLI Uncharacterized protein YheV OS=Escherichia coli (strain K12) GN=yheV PE=4 SV=1
+	2.53017	-0.669293	P0A6N4	29.9811	29.8724	30.173	29.9156	30.5261	30.6043	31.0125	30.4764		179.75	8857200000	166		sp|P0A6N4|EFP_ECOLI Elongation factor P OS=Escherichia coli (strain K12) GN=efp PE=1 SV=2
+	2.20877	-0.677533	P0AC88	25.7694	26.2446	25.6412	26.0349	26.764	26.3547	26.7256	26.556		51.753	447050000	14		sp|P0AC88|GM4D_ECOLI GDP-mannose 4,6-dehydratase OS=Escherichia coli (strain K12) GN=gmd PE=1 SV=1
+	1.6746	-0.687214	P32176	26.4905	26.6462	26.5063	27.2791	27.714	27.2899	27.166	27.501		68.577	876200000	40		sp|P32176|FDOG_ECOLI Formate dehydrogenase-O major subunit OS=Escherichia coli (strain K12) GN=fdoG PE=1 SV=5
+	2.19879	-0.698694	P31979	27.7581	28.2375	28.0176	27.5029	28.4548	28.5188	28.6021	28.7352		213.42	2014300000	65		sp|P31979|NUOF_ECOLI NADH-quinone oxidoreductase subunit F OS=Escherichia coli (strain K12) GN=nuoF PE=1 SV=3
+	3.34924	-0.724748	P0A6R3	28.8199	28.8079	28.8885	29.1103	29.5489	29.7957	29.4582	29.7229		140.59	4271500000	70		sp|P0A6R3|FIS_ECOLI DNA-binding protein Fis OS=Escherichia coli (strain K12) GN=fis PE=1 SV=1
+	1.94942	-0.765213	P29131	25.9217	24.9573	25.4695	25.3392	26.0415	26.0824	26.2905	26.3341		46.888	356510000	12		sp|P29131|FTSN_ECOLI Cell division protein FtsN OS=Escherichia coli (strain K12) GN=ftsN PE=1 SV=3
+	4.24761	-0.766572	P64503	28.4457	28.3498	28.2227	28.1053	29.0339	29.0764	29.0032	29.0764		155.96	2739100000	41		sp|P64503|YEBV_ECOLI Uncharacterized protein YebV OS=Escherichia coli (strain K12) GN=yebV PE=1 SV=1
+	2.1481	-0.784091	P0AFW4	26.3977	26.8175	26.7027	27.14	27.2076	27.5446	27.6831	27.759		88.155	961810000	27		sp|P0AFW4|RNK_ECOLI Regulator of nucleoside diphosphate kinase OS=Escherichia coli (strain K12) GN=rnk PE=1 SV=1
+	1.83866	-0.877099	P32055	25.8056	26.3176	26.2563	25.3383	26.4639	26.8056	26.9792	26.9774		35.869	587130000	21		sp|P32055|FCL_ECOLI GDP-L-fucose synthase OS=Escherichia coli (strain K12) GN=fcl PE=1 SV=2
+	1.66033	-0.913418	P0ACC3	29.8966	29.4425	29.5569	28.5141	30.2653	30.2733	30.3379	30.1873		177.04	6491900000	68		sp|P0ACC3|ERPA_ECOLI Iron-sulfur cluster insertion protein ErpA OS=Escherichia coli (strain K12) GN=erpA PE=1 SV=1
+	3.21124	-0.931092	P02931	26.1417	26.4637	25.8361	26.0553	27.2153	27.0329	26.9369	27.036		64.416	667280000	33		sp|P02931|OMPF_ECOLI Outer membrane protein F OS=Escherichia coli (strain K12) GN=ompF PE=1 SV=1
+	2.93982	-1.4324	P33940	27.3654	27.1066	27.4694	26.4165	28.6272	28.3904	28.6551	28.4149		143.11	1688200000	57		sp|P33940|MQO_ECOLI Malate:quinone oxidoreductase OS=Escherichia coli (strain K12) GN=mqo PE=1 SV=2
+	2.78197	-1.56714	P18196	24.084	24.0595	24.7226	25.2181	26.1239	25.8992	26.0452	26.2843		15.981	321890000	6		sp|P18196|MINC_ECOLI Septum site-determining protein MinC OS=Escherichia coli (strain K12) GN=minC PE=1 SV=1
+	3.50403	-1.64304	P42588	25.642	25.1751	25.5906	25.1281	27.0332	27.0786	27.4277	26.5685		38.745	550680000	15		sp|P42588|PAT_ECOLI Putrescine aminotransferase OS=Escherichia coli (strain K12) GN=patA PE=1 SV=2
+	2.05916	-2.08809	P0A8A8	24.4552	24.6224	24.5876	26.7219	27.0662	27.1262	27.3412	27.2059		15.011	613670000	8		sp|P0A8A8|RIMP_ECOLI Ribosome maturation factor RimP OS=Escherichia coli (strain K12) GN=rimP PE=1 SV=2
+	1.75819	-2.56227	P0AFC7	24.8289	26.5364	22.7791	25.255	27.1828	27.3791	27.7307	27.3559		88.703	852460000	22		sp|P0AFC7|NUOB_ECOLI NADH-quinone oxidoreductase subunit B OS=Escherichia coli (strain K12) GN=nuoB PE=1 SV=1
+	2.52659	-2.69844	P0AGK8	23.3617	23.3355	24.4544	25.661	26.7949	26.7579	26.8451	27.2086		83.981	398850000	9		sp|P0AGK8|ISCR_ECOLI HTH-type transcriptional regulator IscR OS=Escherichia coli (strain K12) GN=iscR PE=1 SV=1
+	4.84329	-3.60029	P0A8Y1	24.892	24.4316	24.1577	25.3947	28.4445	28.2055	28.4642	28.1629		87.119	1154500000	17		sp|P0A8Y1|YJJG_ECOLI Pyrimidine 5-nucleotidase YjjG OS=Escherichia coli (strain K12) GN=yjjG PE=1 SV=1
+	7.12438	-7.15044	P0A9P6	22.9605	23.5123	23.2161	23.8685	30.2531	30.7012	30.423	30.782		323.31	5104300000	113		sp|P0A9P6|DEAD_ECOLI ATP-dependent RNA helicase DeaD OS=Escherichia coli (strain K12) GN=deaD PE=1 SV=2
	1.5332	2.81356	P0ABE2	26.7052	26.5938	26.8963	26.9031	24.5832	26.478	22.418	22.3649		17.32	436000000	11		sp|P0ABE2|BOLA_ECOLI Protein BolA OS=Escherichia coli (strain K12) GN=bolA PE=1 SV=1
	1.02365	1.78232	P31130	27.8442	28.0525	28.1732	28.4742	27.1055	27.3986	27.2189	23.6918		71.916	1245200000	23		sp|P31130|YDEI_ECOLI Uncharacterized protein YdeI OS=Escherichia coli (strain K12) GN=ydeI PE=3 SV=1
	1.16442	1.47082	P0AFI5	25.0421	25.0592	25.9816	25.9662	25.189	24.9469	23.3192	22.7108		9.7505	219280000	7		sp|P0AFI5|PBP7_ECOLI D-alanyl-D-alanine endopeptidase OS=Escherichia coli (strain K12) GN=pbpG PE=1 SV=2
	1.60821	1.41699	P25536	27.5335	27.102	25.9354	26.3469	25.9016	25.7801	24.9013	24.6668		70.164	523010000	17		sp|P25536|YHDE_ECOLI Maf-like protein YhdE OS=Escherichia coli (strain K12) GN=yhdE PE=1 SV=1
	0.821996	1.32966	P0AF96	27.5377	24.8062	27.4364	27.5792	26.2579	24.5583	24.9759	26.2487		27.767	623060000	12		sp|P0AF96|TABA_ECOLI Toxin-antitoxin biofilm protein TabA OS=Escherichia coli (strain K12) GN=tabA PE=1 SV=1
	1.56166	1.21851	P78055	26.2322	25.8487	26.1267	25.3394	25.328	24.58	25.103	23.6619		19.186	205870000	9		sp|P78055|FSAA_ECOLI Fructose-6-phosphate aldolase 1 OS=Escherichia coli (strain K12) GN=fsaA PE=1 SV=2
	0.929641	1.18777	P37617	25.8673	26.6664	26.7608	25.9024	26.3559	23.9802	25.9349	24.1748		15.306	477280000	14		sp|P37617|ATZN_ECOLI Lead, cadmium, zinc and mercury-transporting ATPase OS=Escherichia coli (strain K12) GN=zntA PE=1 SV=1
	1.54389	1.17425	P77739	25.9196	26.2426	26.2272	26.6147	25.3997	25.8724	24.0652	24.9699		45.507	339810000	11		sp|P77739|YNIA_ECOLI Uncharacterized protein YniA OS=Escherichia coli (strain K12) GN=yniA PE=3 SV=1
	0.522063	1.15979	P0ADB7	28.4204	28.6457	28.87	29.0716	28.51	28.6967	28.6102	24.5517		52.875	2358000000	15		sp|P0ADB7|ECNB_ECOLI Entericidin B OS=Escherichia coli (strain K12) GN=ecnB PE=3 SV=1
	0.692739	1.15139	P0A9J0	26.7065	26.0935	26.8365	26.9275	23.5394	26.9105	26.5916	24.917		39.301	572390000	13		sp|P0A9J0|RNG_ECOLI Ribonuclease G OS=Escherichia coli (strain K12) GN=rng PE=1 SV=2
	1.44313	1.15013	P39407	25.5116	25.6212	25.4689	26.0763	25.3781	23.5929	24.1276	24.9789		27.481	182460000	9		sp|P39407|YJJU_ECOLI Uncharacterized protein YjjU OS=Escherichia coli (strain K12) GN=yjjU PE=3 SV=1
	1.23473	1.11394	P0AA31	27.6136	26.2982	26.2314	26.1647	25.8687	25.7639	25.7363	24.4833		63.129	508660000	15		sp|P0AA31|YEDF_ECOLI UPF0033 protein YedF OS=Escherichia coli (strain K12) GN=yedF PE=1 SV=1
	0.750178	1.11042	P52647	26.0121	26.1778	25.8585	26.2243	26.0737	26.3039	23.428	24.0254		28.855	384720000	13		sp|P52647|NIFJ_ECOLI Probable pyruvate-flavodoxin oxidoreductase OS=Escherichia coli (strain K12) GN=ydbK PE=3 SV=2
	0.572044	1.06055	P0AB43	25.1453	25.9225	25.8048	26.3447	25.9574	22.3897	24.7446	25.8835		18.632	318260000	10		sp|P0AB43|YCGL_ECOLI Protein YcgL OS=Escherichia coli (strain K12) GN=ycgL PE=1 SV=2
	1.15629	1.04746	P36649	26.9496	26.852	26.7662	27.5496	26.2503	24.6725	26.4486	26.5562		40.438	601480000	24		sp|P36649|CUEO_ECOLI Blue copper oxidase CueO OS=Escherichia coli (strain K12) GN=cueO PE=1 SV=2
	0.578018	1.03499	P75809	25.2716	26.4779	26.8421	25.8638	24.7169	26.417	26.1145	23.067		9.5058	436360000	9		sp|P75809|YBJI_ECOLI 5-amino-6-(5-phospho-D-ribitylamino)uracil phosphatase YbjI OS=Escherichia coli (strain K12) GN=ybjI PE=1 SV=3
	0.925577	1.027	P42599	26.0602	25.7528	25.8024	27.1299	25.6232	25.3497	23.8036	25.8607		21.632	340930000	10		sp|P42599|YGJR_ECOLI Uncharacterized oxidoreductase YgjR OS=Escherichia coli (strain K12) GN=ygjR PE=3 SV=3
	0.857632	1.02413	P03813	26.4111	25.9406	25.8408	26.8982	25.8949	25.7515	25.7424	23.6053		22.912	410050000	12		sp|P03813|YGEA_ECOLI Uncharacterized protein YgeA OS=Escherichia coli (strain K12) GN=ygeA PE=1 SV=1
	0.711851	1.01067	P0ADT5	24.782	25.8338	25.7519	26.4939	25.5129	24.1952	25.8376	23.2734		13.803	225890000	11		sp|P0ADT5|YGIC_ECOLI Putative acid--amine ligase YgiC OS=Escherichia coli (strain K12) GN=ygiC PE=1 SV=1
	0.895363	0.990644	P0AD49	26.1559	26.4276	26.7354	24.7667	24.1574	25.5894	25.6185	24.7578		9.3453	213730000	7		sp|P0AD49|RAIA_ECOLI Ribosome-associated inhibitor A OS=Escherichia coli (strain K12) GN=raiA PE=1 SV=2
	1.58405	0.969678	P21599	30.8525	30.4161	30.2785	31.683	29.9983	29.9141	29.5657	29.8732		323.31	8406000000	151		sp|P21599|KPYK2_ECOLI Pyruvate kinase II OS=Escherichia coli (strain K12) GN=pykA PE=1 SV=3
	1.38366	0.963269	P60757	27.9207	27.1583	27.6985	28.9312	26.8731	26.9899	26.9875	27.0051		69.336	1205700000	22		sp|P60757|HIS1_ECOLI ATP phosphoribosyltransferase OS=Escherichia coli (strain K12) GN=hisG PE=1 SV=1
	1.07915	0.901059	P76329	25.0103	25.2897	25.2006	25.3133	25.2409	23.3994	23.7798	24.7896		6.8773	147900000	8		sp|P76329|MPGP_ECOLI Mannosyl-3-phosphoglycerate phosphatase OS=Escherichia coli (strain K12) GN=yedP PE=1 SV=1
	1.02545	0.897128	P0A8Y3	26.3256	25.8951	26.0323	26.311	24.4344	24.5378	26.0807	25.9226		25.655	404900000	9		sp|P0A8Y3|YIHX_ECOLI Alpha-D-glucose 1-phosphate phosphatase YihX OS=Escherichia coli (strain K12) GN=yihX PE=1 SV=1
	0.991204	0.887622	P0AAT9	26.8937	26.9941	26.5576	27.1879	26.2722	24.7165	26.6333	26.4608		47.459	541330000	20		sp|P0AAT9|YBEL_ECOLI Uncharacterized protein YbeL OS=Escherichia coli (strain K12) GN=ybeL PE=4 SV=1
	0.739796	0.846843	P77279	25.9777	25.9453	25.8836	25.4758	23.6457	24.5252	25.6703	26.0538		30.893	294200000	11		sp|P77279|FETA_ECOLI Probable iron export ATP-binding protein FetA OS=Escherichia coli (strain K12) GN=fetA PE=1 SV=1
	0.721779	0.829928	P17802	26.766	26.7964	26.6611	27.4742	26.4418	26.6277	24.5194	26.789		14.429	600400000	11		sp|P17802|MUTY_ECOLI Adenine DNA glycosylase OS=Escherichia coli (strain K12) GN=mutY PE=1 SV=1
	0.466015	0.788675	P76172	26.1301	26.6917	26.6637	27.0037	26.5314	26.4764	26.7156	23.6111		7.4003	523670000	14		sp|P76172|YNFD_ECOLI Uncharacterized protein YnfD OS=Escherichia coli (strain K12) GN=ynfD PE=1 SV=2
	0.755407	0.786424	P0A8Z7	25.3887	25.7614	25.7514	25.9833	25.6825	25.2387	25.3477	23.4702		9.9273	268820000	14		sp|P0A8Z7|YQIA_ECOLI Esterase YqiA OS=Escherichia coli (strain K12) GN=yqiA PE=4 SV=1
	0.93966	0.768549	P39298	25.6401	26.2189	25.648	25.6567	26.0588	25.1724	24.2846	24.5736		43.94	276080000	7		sp|P39298|YJFP_ECOLI Esterase YjfP OS=Escherichia coli (strain K12) GN=yjfP PE=4 SV=1
	1.30892	0.750974	P0A6L4	26.0446	25.2479	25.6131	25.9953	25.3553	24.5592	25.4298	24.5526		37.812	256540000	9		sp|P0A6L4|NANA_ECOLI N-acetylneuraminate lyase OS=Escherichia coli (strain K12) GN=nanA PE=1 SV=2
	1.24098	0.738535	P0A8R0	31.3983	31.0502	31.2937	30.0509	30.0744	30.3307	30.3149	30.1188		284.28	11016000000	80		sp|P0A8R0|RRAA_ECOLI Regulator of ribonuclease activity A OS=Escherichia coli (strain K12) GN=rraA PE=1 SV=1
	0.738826	0.733317	P06987	25.8589	26.0275	26.0043	26.1733	25.9872	25.5519	23.861	25.7305		25.449	317580000	17		sp|P06987|HIS7_ECOLI Histidine biosynthesis bifunctional protein HisB OS=Escherichia coli (strain K12) GN=hisB PE=1 SV=1
	0.805174	0.722629	P07026	25.0961	24.7598	24.609	25.8375	24.9614	23.6198	23.878	24.9526		8.2952	141230000	11		sp|P07026|SDIA_ECOLI Regulatory protein SdiA OS=Escherichia coli (strain K12) GN=sdiA PE=1 SV=2
	0.303189	0.684432	P0A840	26.9519	26.0664	26.7897	27.5713	27.3064	23.4858	26.881	26.9684		14.369	679200000	12		sp|P0A840|SURE_ECOLI 5/3-nucleotidase SurE OS=Escherichia coli (strain K12) GN=surE PE=1 SV=1
	1.58769	0.681536	P69908	31.4716	30.7458	30.943	30.4397	30.0116	30.3852	30.1759	30.3011		103.36	10515000000	84		sp|P69908|DCEA_ECOLI Glutamate decarboxylase alpha OS=Escherichia coli (strain K12) GN=gadA PE=1 SV=1
	1.23698	0.651886	P05791	26.9324	26.0888	26.5378	27.2905	26.206	26.0458	26.2192	25.771		64.342	533200000	20		sp|P05791|ILVD_ECOLI Dihydroxy-acid dehydratase OS=Escherichia coli (strain K12) GN=ilvD PE=1 SV=5
	0.76312	0.651622	P0AGF2	24.6796	25.3798	24.6781	25.8959	25.0577	24.7084	24.6023	23.6585		9.1779	165930000	9		sp|P0AGF2|CSDE_ECOLI Sulfur acceptor protein CsdE OS=Escherichia coli (strain K12) GN=csdE PE=1 SV=1
	0.728824	0.639533	P69931	25.7255	25.181	25.4507	26.3957	25.177	24.9384	24.2134	25.8658		17.944	241060000	7		sp|P69931|HDA_ECOLI DnaA regulatory inactivator Hda OS=Escherichia coli (strain K12) GN=hda PE=1 SV=2
	0.451014	0.637665	P08506	26.5572	26.1394	26.3637	25.5349	26.3462	26.3404	25.5383	23.8195		22.025	437370000	13		sp|P08506|DACC_ECOLI D-alanyl-D-alanine carboxypeptidase DacC OS=Escherichia coli (strain K12) GN=dacC PE=1 SV=2
	1.35911	0.629097	P65367	27.109	26.9625	27.1774	27.9268	26.4731	26.5787	27.0181	26.5893		111.96	833690000	33		sp|P65367|YQCA_ECOLI Uncharacterized protein YqcA OS=Escherichia coli (strain K12) GN=yqcA PE=3 SV=1
	1.62191	0.614998	P30749	28.3192	28.4424	28.4685	29.1732	28.0728	27.847	28.1242	27.8993		115.71	1997600000	46		sp|P30749|MOAE_ECOLI Molybdopterin synthase catalytic subunit OS=Escherichia coli (strain K12) GN=moaE PE=1 SV=3
	1.12154	0.606806	P08839	32.8381	32.2916	32.2815	33.4736	32.1383	32.1381	32.0825	32.0987		323.31	38674000000	419		sp|P08839|PT1_ECOLI Phosphoenolpyruvate-protein phosphotransferase OS=Escherichia coli (strain K12) GN=ptsI PE=1 SV=1
	1.56804	0.605584	P30177	29.9781	29.9671	30.1366	30.8265	29.662	29.7207	29.5826	29.5207		269.27	6336900000	163		sp|P30177|YBIB_ECOLI Uncharacterized protein YbiB OS=Escherichia coli (strain K12) GN=ybiB PE=1 SV=1
	1.45735	0.59833	P15067	26.844	26.498	26.62	27.4058	26.3638	26.3323	25.9758	26.3026		56.696	650130000	26		sp|P15067|GLGX_ECOLI Glycogen debranching enzyme OS=Escherichia coli (strain K12) GN=glgX PE=1 SV=3
	1.31742	0.592366	P45523	29.8456	29.8751	29.7564	30.7024	29.5671	29.447	29.6034	29.1926		167.46	5896300000	129		sp|P45523|FKBA_ECOLI FKBP-type peptidyl-prolyl cis-trans isomerase FkpA OS=Escherichia coli (strain K12) GN=fkpA PE=1 SV=1
	0.651998	0.588125	P77689	25.7826	25.987	26.0121	26.2449	25.577	24.1846	25.8784	26.0343		8.7511	350220000	5		sp|P77689|SUFD_ECOLI FeS cluster assembly protein SufD OS=Escherichia coli (strain K12) GN=sufD PE=1 SV=1
	0.850515	0.575643	P0A817	31.4538	31.1184	30.7443	32.2314	31.1775	30.726	30.6469	30.6949		323.31	14807000000	202		sp|P0A817|METK_ECOLI S-adenosylmethionine synthase OS=Escherichia coli (strain K12) GN=metK PE=1 SV=2
	0.423488	0.573628	P0A9F1	26.4552	26.0526	26.0203	25.5907	26.0847	24.1087	24.9496	26.6814		17.156	455410000	12		sp|P0A9F1|MNTR_ECOLI Transcriptional regulator MntR OS=Escherichia coli (strain K12) GN=mntR PE=1 SV=1
	1.3828	0.558882	P04335	27.1696	27.3714	27.2595	28.0418	26.9431	26.8418	27.1158	26.706		51.896	898650000	30		sp|P04335|FRSA_ECOLI Esterase FrsA OS=Escherichia coli (strain K12) GN=frsA PE=3 SV=2
	0.917086	0.547046	P28629	26.935	27.1961	27.6479	27.5611	26.9588	26.7505	26.1156	27.3271		28.37	885920000	19		sp|P28629|ADIA_ECOLI Biodegradative arginine decarboxylase OS=Escherichia coli (strain K12) GN=adiA PE=1 SV=1
	0.92807	0.539184	P31550	26.1381	26.8398	26.5901	27.548	26.1875	26.2232	26.3069	26.2417		27.573	571460000	14		sp|P31550|THIB_ECOLI Thiamine-binding periplasmic protein OS=Escherichia coli (strain K12) GN=thiB PE=1 SV=2
	1.1487	0.531538	P76536	28.5585	28.2375	28.1248	29.1795	28.0785	27.865	28.0841	27.9468		137.79	1966200000	37		sp|P76536|YFEX_ECOLI Probable deferrochelatase/peroxidase YfeX OS=Escherichia coli (strain K12) GN=yfeX PE=1 SV=2
	1.51958	0.531416	P25522	26.0696	25.8869	25.7167	26.189	25.1965	25.7245	25.6854	25.1301		35.664	305330000	13		sp|P25522|MNME_ECOLI tRNA modification GTPase MnmE OS=Escherichia coli (strain K12) GN=mnmE PE=1 SV=3
	0.72232	0.528759	P09099	26.1075	26.1617	25.9202	26.3513	26.142	25.9914	24.6077	25.6846		19.071	393340000	15		sp|P09099|XYLB_ECOLI Xylulose kinase OS=Escherichia coli (strain K12) GN=xylB PE=1 SV=1
	1.389	0.525051	P00490	28.8778	28.7827	28.7346	29.5676	28.4827	28.5095	28.5618	28.3085		165.81	2725400000	60		sp|P00490|PHSM_ECOLI Maltodextrin phosphorylase OS=Escherichia coli (strain K12) GN=malP PE=1 SV=7
	1.47936	0.524529	P0A858	32.6772	32.1359	32.3704	32.5428	31.5682	32.0719	32.2334	31.7546		323.31	36661000000	510		sp|P0A858|TPIS_ECOLI Triosephosphate isomerase OS=Escherichia coli (strain K12) GN=tpiA PE=1 SV=1
	1.38335	0.516269	P0A9Q7	32.8441	32.659	32.3608	33.2069	32.5005	32.256	32.1857	32.0635		323.31	38432000000	570		sp|P0A9Q7|ADHE_ECOLI Aldehyde-alcohol dehydrogenase OS=Escherichia coli (strain K12) GN=adhE PE=1 SV=2
	1.24357	0.505478	P75863	29.0041	28.9144	28.817	29.7253	28.712	28.7089	28.5301	28.488		266.28	2914600000	78		sp|P75863|YCBX_ECOLI Uncharacterized protein YcbX OS=Escherichia coli (strain K12) GN=ycbX PE=1 SV=1
	0.735165	0.502552	P76270	27.6479	27.3955	27.9018	28.9173	27.4261	27.5051	27.4058	27.5154		59.176	1433700000	25		sp|P76270|MSRC_ECOLI Free methionine-R-sulfoxide reductase OS=Escherichia coli (strain K12) GN=msrC PE=1 SV=2
	0.691111	0.500966	P20605	25.6618	26.0512	26.1493	26.0148	26.032	25.5689	24.5053	25.7669		8.2139	322770000	5		sp|P20605|FIC_ECOLI Probable adenosine monophosphate-protein transferase fic OS=Escherichia coli (strain K12) GN=fic PE=1 SV=1
	0.884873	0.500297	P75797	29.4729	29.3831	29.1695	30.3991	29.0611	28.9359	29.0757	29.3507		161.54	4158200000	82		sp|P75797|GSIB_ECOLI Glutathione-binding protein GsiB OS=Escherichia coli (strain K12) GN=gsiB PE=1 SV=1
	0.816902	0.484534	P0AET2	32.5493	32.7242	32.6847	31.4949	31.8178	31.7801	31.9366	31.9804		159.18	32360000000	200		sp|P0AET2|HDEB_ECOLI Acid stress chaperone HdeB OS=Escherichia coli (strain K12) GN=hdeB PE=1 SV=1
	1.62368	0.483946	P0ADU2	29.821	29.5356	29.8704	29.5957	28.9105	29.3561	29.5324	29.0879		89.364	4743300000	71		sp|P0ADU2|YGIN_ECOLI Probable quinol monooxygenase YgiN OS=Escherichia coli (strain K12) GN=ygiN PE=1 SV=1
	0.29434	0.480622	P0AGJ2	25.0125	25.3581	25.0961	25.5307	25.5293	25.2614	22.7611	25.5231		15.863	214160000	10		sp|P0AGJ2|TRMH_ECOLI tRNA (guanosine(18)-2-O)-methyltransferase OS=Escherichia coli (strain K12) GN=trmH PE=1 SV=1
	1.13133	0.480447	P0ADR8	27.883	27.1422	27.1049	27.8649	27.1413	26.9493	26.9302	27.0524		61.989	999890000	22		sp|P0ADR8|YGDH_ECOLI LOG family protein YgdH OS=Escherichia coli (strain K12) GN=ygdH PE=1 SV=1
	0.893402	0.479812	P0AGG0	24.8342	24.7926	25.9114	25.4886	24.8532	24.7359	24.785	24.7334		13.109	173100000	8		sp|P0AGG0|THIL_ECOLI Thiamine-monophosphate kinase OS=Escherichia coli (strain K12) GN=thiL PE=1 SV=1
	0.407549	0.47712	P12008	26.2547	25.9605	25.8641	25.8024	24.0418	26.1239	25.5577	26.2498		12.929	490480000	11		sp|P12008|AROC_ECOLI Chorismate synthase OS=Escherichia coli (strain K12) GN=aroC PE=1 SV=4
	1.49122	0.472663	P31133	28.2606	28.1684	28.8187	28.6872	27.9514	27.8894	28.1756	28.0277		85.914	2016400000	52		sp|P31133|POTF_ECOLI Putrescine-binding periplasmic protein OS=Escherichia coli (strain K12) GN=potF PE=1 SV=3
	0.486956	0.47131	P36673	25.4025	25.265	25.4999	25.4118	25.3237	25.2342	23.6215	25.5144		52.629	258820000	12		sp|P36673|TRER_ECOLI HTH-type transcriptional regulator TreR OS=Escherichia coli (strain K12) GN=treR PE=1 SV=2
	1.25033	0.462509	P69828	28.8215	29.2166	28.8753	29.4576	28.9889	28.5025	28.4159	28.6137		54.184	2871800000	51		sp|P69828|PTKA_ECOLI Galactitol-specific phosphotransferase enzyme IIA component OS=Escherichia coli (strain K12) GN=gatA PE=3 SV=1
	1.02982	0.460636	P0A6L0	30.9994	30.8237	30.8297	31.7558	30.5359	30.5556	30.8231	30.6515		323.31	12646000000	174		sp|P0A6L0|DEOC_ECOLI Deoxyribose-phosphate aldolase OS=Escherichia coli (strain K12) GN=deoC PE=1 SV=1
	0.6822	0.455228	P39411	26.2804	25.5591	25.5221	25.1833	24.5534	25.5976	25.3862	25.1869		10.257	377170000	9		sp|P39411|NCPP_ECOLI Non-canonical purine NTP phosphatase OS=Escherichia coli (strain K12) GN=yjjX PE=1 SV=2
	0.305266	0.453591	P0A9J6	26.3136	26.4191	26.6091	25.0763	26.1192	26.2673	26.119	24.0983		27.971	493310000	17		sp|P0A9J6|RBSK_ECOLI Ribokinase OS=Escherichia coli (strain K12) GN=rbsK PE=1 SV=1
	0.837579	0.452771	P04995	24.892	24.8547	24.8383	25.8736	24.764	24.5744	24.4411	24.868		9.7769	126780000	9		sp|P04995|EX1_ECOLI Exodeoxyribonuclease I OS=Escherichia coli (strain K12) GN=sbcB PE=1 SV=2
	0.645104	0.45188	P77475	25.5735	25.2826	24.9914	26.4388	25.3789	24.8503	24.9886	25.2608		21.926	217370000	9		sp|P77475|YQAB_ECOLI Fructose-1-phosphate phosphatase YqaB OS=Escherichia coli (strain K12) GN=yqaB PE=1 SV=1
	1.17272	0.443902	P75818	25.4254	25.607	25.3563	25.8315	25.3112	25.2321	24.6089	25.2923		10.568	262590000	14		sp|P75818|YBJP_ECOLI Uncharacterized lipoprotein YbjP OS=Escherichia coli (strain K12) GN=ybjP PE=1 SV=1
	0.919774	0.440818	P0AAS7	27.4458	27.0759	27.4717	28.2308	27.181	27.0672	27.1073	27.1054		26.211	1135000000	27		sp|P0AAS7|YBCJ_ECOLI Uncharacterized protein YbcJ OS=Escherichia coli (strain K12) GN=ybcJ PE=1 SV=1
	0.659185	0.435102	P37128	28.5637	28.6238	28.4993	29.8112	28.3758	28.5119	28.5354	28.3345		109.5	2730800000	56		sp|P37128|NUDK_ECOLI GDP-mannose pyrophosphatase NudK OS=Escherichia coli (strain K12) GN=nudK PE=1 SV=2
	1.24453	0.43444	P0A9D4	26.5862	26.6006	26.4001	27.1806	26.1897	26.4728	26.1375	26.2299		57.278	551370000	25		sp|P0A9D4|CYSE_ECOLI Serine acetyltransferase OS=Escherichia coli (strain K12) GN=cysE PE=1 SV=1
	0.278621	0.432055	P0ADT2	26.0836	26.0973	26.5244	25.1269	26.6925	26.244	24.224	24.9435		14.354	470310000	7		sp|P0ADT2|YGIB_ECOLI UPF0441 protein YgiB OS=Escherichia coli (strain K12) GN=ygiB PE=3 SV=2
	0.73985	0.430798	P62620	26.8603	26.7847	26.4604	27.7612	26.613	26.3518	26.6058	26.5727		57.666	656300000	23		sp|P62620|ISPG_ECOLI 4-hydroxy-3-methylbut-2-en-1-yl diphosphate synthase (flavodoxin) OS=Escherichia coli (strain K12) GN=ispG PE=1 SV=1
	1.24266	0.427715	P37636	26.9459	26.729	26.7848	27.4854	26.6737	26.6298	26.5147	26.4161		74.491	687500000	31		sp|P37636|MDTE_ECOLI Multidrug resistance protein MdtE OS=Escherichia coli (strain K12) GN=mdtE PE=1 SV=1
	0.336977	0.42763	P0A8I3	26.1936	26.1563	26.3165	27.244	24.6239	26.4505	26.6339	26.4915		39.414	495570000	8		sp|P0A8I3|YAAA_ECOLI UPF0246 protein YaaA OS=Escherichia coli (strain K12) GN=yaaA PE=1 SV=1
	1.14767	0.427178	P0A9M8	31.2282	31.153	30.9436	31.8091	30.9935	30.8418	30.6985	30.8914		323.31	13663000000	308		sp|P0A9M8|PTA_ECOLI Phosphate acetyltransferase OS=Escherichia coli (strain K12) GN=pta PE=1 SV=2
	0.327945	0.425945	P77735	26.1599	25.8321	24.3683	26.3411	25.7127	25.6315	25.3432	24.3103		20.392	316450000	9		sp|P77735|YAJO_ECOLI Uncharacterized oxidoreductase YajO OS=Escherichia coli (strain K12) GN=yajO PE=3 SV=2
	0.724595	0.414483	P17109	26.1684	26.4104	26.4947	27.4345	26.2585	26.235	26.2298	26.1268		28.65	535480000	23		sp|P17109|MEND_ECOLI 2-succinyl-5-enolpyruvyl-6-hydroxy-3-cyclohexene-1-carboxylate synthase OS=Escherichia coli (strain K12) GN=menD PE=1 SV=4
	1.11998	0.413296	P33570	31.0807	31.1847	31.1475	31.8963	30.9891	30.9132	30.8573	30.8963		323.31	14786000000	299		sp|P33570|TKT2_ECOLI Transketolase 2 OS=Escherichia coli (strain K12) GN=tktB PE=1 SV=1
	1.10982	0.413085	P0AF50	27.5895	27.8448	27.7648	28.4606	27.374	27.5499	27.5514	27.5319		64.493	1335500000	34		sp|P0AF50|YJBR_ECOLI Uncharacterized protein YjbR OS=Escherichia coli (strain K12) GN=yjbR PE=1 SV=1
	0.637968	0.411888	P0A8T1	25.8079	25.7943	25.6679	26.5175	25.8676	25.6837	25.7671	24.8216		18.965	309270000	12		sp|P0A8T1|PRMA_ECOLI Ribosomal protein L11 methyltransferase OS=Escherichia coli (strain K12) GN=prmA PE=1 SV=1
	1.07502	0.409346	P21338	28.1859	28.6624	28.5171	29.0714	27.9992	28.2567	28.1933	28.3502		74.316	2122800000	42		sp|P21338|RNI_ECOLI Ribonuclease I OS=Escherichia coli (strain K12) GN=rna PE=1 SV=1
	0.666111	0.40631	P23917	27.6894	28.0336	27.8467	28.9817	27.7903	27.729	27.6014	27.8054		112.06	1554600000	40		sp|P23917|MAK_ECOLI Fructokinase OS=Escherichia coli (strain K12) GN=mak PE=1 SV=2
	0.880616	0.403972	Q47679	27.7641	27.321	27.4708	28.3446	27.2074	27.28	27.3571	27.44		131.86	1201500000	44		sp|Q47679|YAFV_ECOLI Hydrolase YafV OS=Escherichia coli (strain K12) GN=yafV PE=3 SV=1
	0.57051	0.403062	P60664	25.4719	25.5528	25.6343	26.8624	25.4028	25.4571	25.5688	25.4805		39.275	268350000	12		sp|P60664|HIS6_ECOLI Imidazole glycerol phosphate synthase subunit HisF OS=Escherichia coli (strain K12) GN=hisF PE=1 SV=1
	0.802438	0.402905	P0A9Q1	29.6776	29.5029	29.6002	30.5687	29.3748	29.4087	29.5517	29.4026		323.31	5300900000	142		sp|P0A9Q1|ARCA_ECOLI Aerobic respiration control protein ArcA OS=Escherichia coli (strain K12) GN=arcA PE=1 SV=1
	0.990329	0.402718	P07604	26.5773	26.9317	26.0839	26.1755	25.8748	26.0835	25.9764	26.2228		41.209	468950000	9		sp|P07604|TYRR_ECOLI Transcriptional regulatory protein TyrR OS=Escherichia coli (strain K12) GN=tyrR PE=1 SV=2
	0.727836	0.402637	P0A877	26.9644	27.1438	26.7482	27.94	26.989	26.7935	26.7799	26.6234		44.903	777060000	17		sp|P0A877|TRPA_ECOLI Tryptophan synthase alpha chain OS=Escherichia coli (strain K12) GN=trpA PE=1 SV=1
	1.2734	0.400494	P0AG78	31.4906	31.9303	32.1825	31.9174	31.3015	31.5243	31.6955	31.3975		323.31	21769000000	262		sp|P0AG78|SUBI_ECOLI Sulfate-binding protein OS=Escherichia coli (strain K12) GN=sbp PE=1 SV=1
	0.857473	0.398254	P16456	29.2299	29.0554	28.8082	29.8791	28.9477	28.7484	28.7927	28.8907		173.78	3396500000	73		sp|P16456|SELD_ECOLI Selenide, water dikinase OS=Escherichia coli (strain K12) GN=selD PE=1 SV=1
	1.56197	0.38866	P06999	28.4619	28.114	28.029	28.5012	27.8551	27.8591	27.7779	28.0592		91.64	1764600000	45		sp|P06999|PFKB_ECOLI ATP-dependent 6-phosphofructokinase isozyme 2 OS=Escherichia coli (strain K12) GN=pfkB PE=1 SV=2
	0.876823	0.387216	P0A8E7	30.3479	30.21	30.4114	31.1593	30.0373	30.1029	30.332	30.1076		323.31	8373600000	157		sp|P0A8E7|YAJQ_ECOLI UPF0234 protein YajQ OS=Escherichia coli (strain K12) GN=yajQ PE=1 SV=2
	0.591476	0.382818	P64467	25.994	25.9481	26.2394	26.9996	26.146	25.6171	25.5811	26.3056		15.433	537810000	19		sp|P64467|CNU_ECOLI OriC-binding nucleoid-associated protein OS=Escherichia coli (strain K12) GN=cnu PE=1 SV=1
	0.969173	0.381985	P0ABU5	28.4186	28.7256	28.4094	29.2327	28.3361	28.4345	28.1537	28.3342		72.69	2276200000	42		sp|P0ABU5|ELBB_ECOLI Enhancing lycopene biosynthesis protein 2 OS=Escherichia coli (strain K12) GN=elbB PE=1 SV=1
	0.649643	0.380403	P0A879	27.6353	27.3539	27.2213	28.1917	27.7563	26.9765	27.069	27.0788		71.131	1094300000	35		sp|P0A879|TRPB_ECOLI Tryptophan synthase beta chain OS=Escherichia coli (strain K12) GN=trpB PE=1 SV=2
	1.11068	0.379355	P0AEM9	33.6756	34.0083	34.1919	33.4757	33.2894	33.4802	33.6543	33.4102		323.31	86947000000	585		sp|P0AEM9|FLIY_ECOLI L-cystine-binding protein FliY OS=Escherichia coli (strain K12) GN=fliY PE=1 SV=1
	0.765684	0.378163	P08331	28.0124	28.2188	28.2671	28.9025	28.0466	27.8728	28.3399	27.6287		78.64	1847700000	50		sp|P08331|CPDB_ECOLI 2,3-cyclic-nucleotide 2-phosphodiesterase/3-nucleotidase OS=Escherichia coli (strain K12) GN=cpdB PE=1 SV=2
	0.359406	0.378024	P64451	27.8412	27.3058	27.7587	29.3327	27.7721	27.7228	27.8706	27.3608		50.687	1616800000	32		sp|P64451|YDCL_ECOLI Uncharacterized lipoprotein YdcL OS=Escherichia coli (strain K12) GN=ydcL PE=3 SV=1
	0.843206	0.374271	P0A8X0	25.3546	25.7741	25.3499	25.1427	25.1469	24.5043	25.1734	25.2997		19.893	230630000	16		sp|P0A8X0|YJGA_ECOLI UPF0307 protein YjgA OS=Escherichia coli (strain K12) GN=yjgA PE=1 SV=1
	1.08622	0.369214	P0AEG4	31.6668	32.2224	32.4115	32.1946	31.5325	31.7846	31.8686	31.8328		323.31	26617000000	132		sp|P0AEG4|DSBA_ECOLI Thiol:disulfide interchange protein DsbA OS=Escherichia coli (strain K12) GN=dsbA PE=1 SV=1
	1.32617	0.364947	P76108	26.6154	26.9456	27.0775	27.2287	26.5831	26.54	26.7933	26.4911		43.441	710190000	25		sp|P76108|YDCS_ECOLI Putative ABC transporter periplasmic-binding protein YdcS OS=Escherichia coli (strain K12) GN=ydcS PE=3 SV=1
	1.50393	0.364946	P75694	31.0354	30.7465	31.0116	30.7701	30.274	30.701	30.6995	30.4293		223.78	10985000000	148		sp|P75694|YAHO_ECOLI Uncharacterized protein YahO OS=Escherichia coli (strain K12) GN=yahO PE=3 SV=1
	0.807551	0.356721	P77808	29.2456	29.3645	29.4784	30.2048	29.3156	29.1387	29.156	29.2562		231.73	4290400000	80		sp|P77808|CINAL_ECOLI NMN amidohydrolase-like protein YfaY OS=Escherichia coli (strain K12) GN=yfaY PE=1 SV=1
	0.956029	0.354849	P0ACP7	28.6876	28.0858	28.1271	28.6743	27.9024	27.9941	28.3083	27.9505		124.1	1925600000	55		sp|P0ACP7|PURR_ECOLI HTH-type transcriptional repressor PurR OS=Escherichia coli (strain K12) GN=purR PE=1 SV=2
	1.3851	0.353237	P0AFL3	31.1234	30.8802	30.8388	31.3389	30.6749	30.66	30.8877	30.5458		247.74	12641000000	133		sp|P0AFL3|PPIA_ECOLI Peptidyl-prolyl cis-trans isomerase A OS=Escherichia coli (strain K12) GN=ppiA PE=1 SV=1
	1.24811	0.351867	P18390	27.6706	27.8756	27.5553	27.5937	27.1283	27.3426	27.1316	27.6852		35.255	1115900000	9		sp|P18390|YJJA_ECOLI Uncharacterized protein YjjA OS=Escherichia coli (strain K12) GN=yjjA PE=3 SV=3
	0.563046	0.348984	P0A8H6	25.9288	25.6302	25.9078	26.9047	25.6543	25.9547	25.7608	25.6058		61.29	371480000	16		sp|P0A8H6|YIHI_ECOLI Der GTPase-activating protein YihI OS=Escherichia coli (strain K12) GN=yihI PE=1 SV=1
	0.48339	0.348394	P25397	27.3871	27.8207	27.6567	28.8128	27.6396	27.3637	27.4521	27.8282		100.69	1415500000	24		sp|P25397|TEHB_ECOLI Tellurite methyltransferase OS=Escherichia coli (strain K12) GN=tehB PE=1 SV=1
	1.11253	0.344502	P00582	30.2797	30.0174	30.0197	30.655	29.8216	29.8421	29.8555	30.0747		323.31	6986100000	185		sp|P00582|DPO1_ECOLI DNA polymerase I OS=Escherichia coli (strain K12) GN=polA PE=1 SV=1
	0.455444	0.339973	P0A9K3	28.3295	28.3451	28.1189	29.5847	28.2519	28.1612	28.2878	28.3175		191.63	2287300000	78		sp|P0A9K3|PHOL_ECOLI PhoH-like protein OS=Escherichia coli (strain K12) GN=ybeZ PE=1 SV=2
	1.00122	0.338411	P37095	27.4435	27.4795	27.4481	28.1358	27.3459	27.2029	27.2476	27.3568		111.49	1108400000	38		sp|P37095|PEPB_ECOLI Peptidase B OS=Escherichia coli (strain K12) GN=pepB PE=3 SV=2
	0.413604	0.337805	P0A9F3	26.6262	26.3448	25.733	27.1577	26.404	25.8918	25.6731	26.5416		33.337	483930000	18		sp|P0A9F3|CYSB_ECOLI HTH-type transcriptional regulator CysB OS=Escherichia coli (strain K12) GN=cysB PE=3 SV=1
	1.19409	0.33473	P75913	27.4637	27.2613	27.4969	27.6227	27.0232	27.2781	27.3847	26.8198		61.284	1048400000	19		sp|P75913|GHRA_ECOLI Glyoxylate/hydroxypyruvate reductase A OS=Escherichia coli (strain K12) GN=ghrA PE=1 SV=2
	0.712656	0.333566	A5A621	25.6917	25.5311	25.6815	25.0267	25.4848	25.3571	24.7617	24.9932		19.355	249720000	11		sp|A5A621|YPFM_ECOLI Uncharacterized protein YpfM OS=Escherichia coli (strain K12) GN=ypfM PE=1 SV=1
	0.570972	0.333562	P27431	28.7781	29.2416	29.258	28.6402	29.0241	28.5789	28.0429	28.9377		150.11	2945700000	56		sp|P27431|ROXA_ECOLI 50S ribosomal protein L16 3-hydroxylase OS=Escherichia coli (strain K12) GN=roxA PE=1 SV=2
	0.989711	0.331834	P0A9M0	29.5707	29.5637	29.0948	29.772	29.4501	29.0405	29.1187	29.0646		239.72	4095500000	119		sp|P0A9M0|LON_ECOLI Lon protease OS=Escherichia coli (strain K12) GN=lon PE=1 SV=1
	0.219356	0.331067	P77182	24.2185	24.2359	23.5233	26.1763	23.7575	24.1794	24.7248	24.168		13.709	88650000	5		sp|P77182|MNMC_ECOLI tRNA 5-methylaminomethyl-2-thiouridine biosynthesis bifunctional protein MnmC OS=Escherichia coli (strain K12) GN=mnmC PE=1 SV=2
	0.581061	0.330521	P0A917	29.8681	29.5681	28.9075	29.9034	29.6019	29.2542	29.0726	28.9963		156.53	4370100000	79		sp|P0A917|OMPX_ECOLI Outer membrane protein X OS=Escherichia coli (strain K12) GN=ompX PE=1 SV=1
	1.11688	0.330162	P0A6V8	29.7784	29.6217	29.922	30.3172	29.5474	29.5743	29.6936	29.5034		230.66	5751400000	98		sp|P0A6V8|GLK_ECOLI Glucokinase OS=Escherichia coli (strain K12) GN=glk PE=1 SV=1
	0.858696	0.329813	P0AC86	30.026	29.8842	29.7436	30.5968	29.8433	29.7756	29.6316	29.6809		323.31	6228400000	135		sp|P0AC86|PHSG_ECOLI Glycogen phosphorylase OS=Escherichia coli (strain K12) GN=glgP PE=3 SV=1
	0.60797	0.329559	P07862	27.3217	27.3654	27.4837	28.3811	27.3074	27.4605	27.1779	27.2879		43.682	1147700000	45		sp|P07862|DDLB_ECOLI D-alanine--D-alanine ligase B OS=Escherichia coli (strain K12) GN=ddlB PE=1 SV=3
	0.57416	0.329437	P0ADI4	27.2532	27.1788	26.8826	28.0025	27.2975	27.0854	26.9029	26.7137		55.492	917720000	28		sp|P0ADI4|ENTB_ECOLI Enterobactin synthase component B OS=Escherichia coli (strain K12) GN=entB PE=1 SV=1
	0.825777	0.329247	P23721	32.9242	32.6019	32.5782	33.3964	32.5654	32.6298	32.6087	32.3797		323.31	46193000000	366		sp|P23721|SERC_ECOLI Phosphoserine aminotransferase OS=Escherichia coli (strain K12) GN=serC PE=1 SV=4
	1.27075	0.327979	P0A8M6	30.4323	30.5236	29.9461	30.1797	30.0379	29.9824	29.8487	29.901		161.61	7713900000	54		sp|P0A8M6|YEEX_ECOLI UPF0265 protein YeeX OS=Escherichia coli (strain K12) GN=yeeX PE=1 SV=1
	1.09914	0.324093	P07024	29.9014	29.5188	29.6877	30.1877	29.3906	29.57	29.6088	29.4297		172.83	5294900000	144		sp|P07024|USHA_ECOLI Protein UshA OS=Escherichia coli (strain K12) GN=ushA PE=1 SV=2
	0.558963	0.323886	P68739	26.7206	26.93	26.9112	27.9079	26.7425	26.7757	26.9048	26.7512		68.8	825600000	27		sp|P68739|NFI_ECOLI Endonuclease V OS=Escherichia coli (strain K12) GN=nfi PE=1 SV=1
	1.07113	0.322011	P0ADI7	29.4711	28.807	29.0698	28.9523	28.6569	28.8975	28.8232	28.6346		87.679	3146600000	57		sp|P0ADI7|YECD_ECOLI Isochorismatase family protein YecD OS=Escherichia coli (strain K12) GN=yecD PE=1 SV=2
	0.740848	0.320816	P35340	31.5815	31.1826	31.4016	32.1694	31.2137	31.2957	31.2573	31.2851		323.31	17669000000	287		sp|P35340|AHPF_ECOLI Alkyl hydroperoxide reductase subunit F OS=Escherichia coli (strain K12) GN=ahpF PE=1 SV=2
	0.458447	0.319883	P25524	28.709	28.7877	28.5028	29.6952	28.4188	28.262	28.6965	29.0379		132.84	2808800000	66		sp|P25524|CODA_ECOLI Cytosine deaminase OS=Escherichia coli (strain K12) GN=codA PE=1 SV=3
	0.625097	0.319682	P0ADV7	29.2094	29.156	29.0166	30.0774	28.9811	28.9987	29.1317	29.0692		128.84	3889700000	80		sp|P0ADV7|MLAC_ECOLI Probable phospholipid-binding protein MlaC OS=Escherichia coli (strain K12) GN=mlaC PE=1 SV=1
	0.468941	0.319274	P0AB52	26.9619	27.3024	27.1858	28.2159	27.3296	27.189	26.7003	27.1702		35.68	916010000	21		sp|P0AB52|YCHN_ECOLI Protein YchN OS=Escherichia coli (strain K12) GN=ychN PE=1 SV=1
	0.217791	0.317641	P25535	25.0848	24.8525	23.6409	26.3872	25.1051	24.6555	24.5366	24.3977		17.437	156800000	9		sp|P25535|UBII_ECOLI 2-octaprenylphenol hydroxylase OS=Escherichia coli (strain K12) GN=ubiI PE=1 SV=2
	0.687355	0.315422	P0A6J8	30.267	30.2283	30.2093	31.0851	30.0899	30.2367	30.2301	29.9712		323.31	8118600000	141		sp|P0A6J8|DDLA_ECOLI D-alanine--D-alanine ligase A OS=Escherichia coli (strain K12) GN=ddlA PE=3 SV=1
	0.749876	0.315219	P06986	29.1842	28.8871	28.9519	29.7903	28.8599	28.9332	28.902	28.8577		229.34	3558500000	96		sp|P06986|HIS8_ECOLI Histidinol-phosphate aminotransferase OS=Escherichia coli (strain K12) GN=hisC PE=1 SV=2
	0.818406	0.30943	P27829	28.9288	28.8465	28.762	29.5517	28.718	28.7559	28.8228	28.5547		136.76	2952700000	72		sp|P27829|WECC_ECOLI UDP-N-acetyl-D-mannosamine dehydrogenase OS=Escherichia coli (strain K12) GN=wecC PE=1 SV=4
	0.542377	0.307759	P75874	29.8021	29.495	29.4812	30.5893	29.4207	29.5391	29.5522	29.6245		274.52	5542100000	70		sp|P75874|YCCU_ECOLI Uncharacterized protein YccU OS=Escherichia coli (strain K12) GN=yccU PE=1 SV=2
	0.73025	0.306799	P77395	29.247	29.9963	29.4878	29.3955	29.4554	29.1282	28.915	29.4009		167.96	4427200000	57		sp|P77395|YBBN_ECOLI Uncharacterized protein YbbN OS=Escherichia coli (strain K12) GN=ybbN PE=1 SV=2
	0.567333	0.304725	P06992	28.3493	28.4268	28.5148	29.4078	28.3692	28.4517	28.4226	28.2362		127.81	2370400000	38		sp|P06992|RSMA_ECOLI Ribosomal RNA small subunit methyltransferase A OS=Escherichia coli (strain K12) GN=rsmA PE=1 SV=1
	0.407515	0.304211	P0A6I6	27.8525	27.9496	27.2614	27.4194	28.0981	27.3029	27.1117	26.7534		45.51	1259800000	20		sp|P0A6I6|COAD_ECOLI Phosphopantetheine adenylyltransferase OS=Escherichia coli (strain K12) GN=coaD PE=1 SV=1
	0.653619	0.303671	P0AEY5	28.0773	27.6563	27.9969	28.7109	27.7266	27.8314	27.7754	27.8933		76.333	1620000000	35		sp|P0AEY5|MDAB_ECOLI Modulator of drug activity B OS=Escherichia coli (strain K12) GN=mdaB PE=1 SV=1
	1.04681	0.303425	P0AES0	30.1646	30.3553	30.5226	30.8411	30.088	30.0956	30.2248	30.2615		323.31	8527100000	187		sp|P0AES0|GSP_ECOLI Bifunctional glutathionylspermidine synthetase/amidase OS=Escherichia coli (strain K12) GN=gss PE=1 SV=1
	0.780772	0.301963	P77570	27.0391	27.4204	27.1517	27.7783	27.0238	27.1012	27.2639	26.7928		43.351	892030000	23		sp|P77570|ANMK_ECOLI Anhydro-N-acetylmuramic acid kinase OS=Escherichia coli (strain K12) GN=anmK PE=1 SV=1
	0.764878	0.300037	P0AB46	26.5478	27.0023	27.1396	27.3397	26.4851	26.6102	26.8618	26.872		64.674	682930000	26		sp|P0AB46|YMGD_ECOLI Uncharacterized protein YmgD OS=Escherichia coli (strain K12) GN=ymgD PE=1 SV=2
	0.446931	0.297525	P0A6Y5	27.0554	26.7836	26.6313	27.8585	26.7538	26.6345	26.6171	27.1333		28.129	688380000	18		sp|P0A6Y5|HSLO_ECOLI 33 kDa chaperonin OS=Escherichia coli (strain K12) GN=hslO PE=1 SV=1
	0.847314	0.296846	P08957	28.4221	28.4881	28.5748	29.0486	28.5119	28.1544	28.1596	28.5203		181.59	2213900000	87		sp|P08957|T1MK_ECOLI Type I restriction enzyme EcoKI M protein OS=Escherichia coli (strain K12) GN=hsdM PE=1 SV=1
	0.683059	0.295772	P76145	27.2887	27.5519	27.3042	28.1405	27.442	27.2167	27.3037	27.1397		120.21	1097000000	35		sp|P76145|TAM_ECOLI Trans-aconitate 2-methyltransferase OS=Escherichia coli (strain K12) GN=tam PE=1 SV=3
	0.355116	0.294689	P23893	29.251	28.9422	28.9097	30.3657	29.3051	28.9204	28.868	29.1963		211.13	3994500000	97		sp|P23893|GSA_ECOLI Glutamate-1-semialdehyde 2,1-aminomutase OS=Escherichia coli (strain K12) GN=hemL PE=1 SV=2
	1.20556	0.293694	P36938	31.7968	31.4813	31.4698	31.7765	31.5052	31.4871	31.1734	31.1839		323.31	18754000000	269		sp|P36938|PGM_ECOLI Phosphoglucomutase OS=Escherichia coli (strain K12) GN=pgm PE=1 SV=1
	0.747188	0.291895	P22525	26.2867	26.4649	26.1516	26.8606	26.079	26.1037	26.475	25.9386		28.444	520820000	16		sp|P22525|YCBB_ECOLI Probable L,D-transpeptidase YcbB OS=Escherichia coli (strain K12) GN=ycbB PE=3 SV=2
	0.894089	0.291223	P32157	28.7513	28.5976	28.8899	29.2754	28.637	28.5717	28.7572	28.3834		102.59	2778600000	51		sp|P32157|YIIM_ECOLI Protein YiiM OS=Escherichia coli (strain K12) GN=yiiM PE=1 SV=2
	0.7967	0.288516	P24171	30.5072	30.638	30.6347	31.2827	30.5216	30.3607	30.5463	30.48		323.31	10032000000	152		sp|P24171|DCP_ECOLI Peptidyl-dipeptidase dcp OS=Escherichia coli (strain K12) GN=dcp PE=1 SV=4
	1.3422	0.285692	P00864	33.6738	33.4766	33.4598	33.893	33.3943	33.4282	33.3407	33.1973		323.31	75723000000	851		sp|P00864|CAPP_ECOLI Phosphoenolpyruvate carboxylase OS=Escherichia coli (strain K12) GN=ppc PE=1 SV=1
	1.19542	0.282878	P27298	31.0081	31.132	30.8338	31.396	30.8521	30.8937	30.7774	30.7152		323.31	12930000000	211		sp|P27298|OPDA_ECOLI Oligopeptidase A OS=Escherichia coli (strain K12) GN=prlC PE=3 SV=3
	0.672882	0.282016	P23827	29.1087	29.478	29.5156	30.0384	29.2646	29.0795	29.3977	29.271		105.48	4312400000	69		sp|P23827|ECOT_ECOLI Ecotin OS=Escherichia coli (strain K12) GN=eco PE=1 SV=1
	1.28826	0.281548	P07004	29.2644	29.1649	29.127	29.5967	29.1384	28.9771	28.9296	28.9817		182.49	3509300000	77		sp|P07004|PROA_ECOLI Gamma-glutamyl phosphate reductase OS=Escherichia coli (strain K12) GN=proA PE=1 SV=2
	0.266084	0.281404	P64429	24.1577	23.4885	24.4203	25.5131	24.0276	23.8743	24.1589	24.3932		28.149	141280000	19		sp|P64429|YPFJ_ECOLI Uncharacterized protein YpfJ OS=Escherichia coli (strain K12) GN=ypfJ PE=4 SV=1
	0.288795	0.280918	P63235	25.5896	24.871	26.1873	25.9296	25.6158	25.7508	25.5806	24.5065		21.697	293920000	12		sp|P63235|GADC_ECOLI Probable glutamate/gamma-aminobutyrate antiporter OS=Escherichia coli (strain K12) GN=gadC PE=1 SV=1
	0.333207	0.280806	P39286	24.838	24.0916	24.2795	25.2454	24.8627	23.7056	24.518	24.245		17.937	147410000	10		sp|P39286|RSGA_ECOLI Putative ribosome biogenesis GTPase RsgA OS=Escherichia coli (strain K12) GN=rsgA PE=1 SV=2
	1.44798	0.277909	P0AE78	28.4484	28.3225	28.3813	28.0078	27.9678	28.1083	28.0031	27.969		37.678	1874100000	41		sp|P0AE78|CORC_ECOLI Magnesium and cobalt efflux protein CorC OS=Escherichia coli (strain K12) GN=corC PE=1 SV=1
	0.963684	0.276628	P07003	30.136	29.8005	29.9273	30.435	29.7291	29.8471	29.911	29.7052		323.31	6308000000	149		sp|P07003|POXB_ECOLI Pyruvate dehydrogenase [ubiquinone] OS=Escherichia coli (strain K12) GN=poxB PE=1 SV=1
	0.578635	0.27297	P30859	31.5609	31.9942	32.1602	31.2991	31.2342	31.4916	31.727	31.4697		323.31	20970000000	318		sp|P30859|ARTI_ECOLI Putative ABC transporter arginine-binding protein 2 OS=Escherichia coli (strain K12) GN=artI PE=1 SV=3
	0.319805	0.269026	P0AA39	26.6087	27.3661	27.5766	28.2503	27.0066	26.978	27.3039	27.4371		45.549	1037800000	26		sp|P0AA39|RLUC_ECOLI Ribosomal large subunit pseudouridine synthase C OS=Escherichia coli (strain K12) GN=rluC PE=1 SV=1
	0.81028	0.268835	P07623	24.8777	24.9063	24.7932	25.4585	24.8692	24.826	24.5882	24.677		20.684	123960000	4		sp|P07623|META_ECOLI Homoserine O-succinyltransferase OS=Escherichia coli (strain K12) GN=metA PE=1 SV=4
	0.860539	0.268751	P62768	28.1565	27.8437	28.0598	27.5483	27.5853	27.6305	27.4662	27.8513		96.328	1426000000	48		sp|P62768|YAEH_ECOLI UPF0325 protein YaeH OS=Escherichia coli (strain K12) GN=yaeH PE=3 SV=1
	1.23461	0.266749	P0A9D2	29.0245	28.5827	28.5355	28.7709	28.4163	28.4265	28.4688	28.5351		189.93	2549900000	59		sp|P0A9D2|GSTA_ECOLI Glutathione S-transferase GstA OS=Escherichia coli (strain K12) GN=gstA PE=1 SV=1
	0.781857	0.265391	P76558	29.9181	29.8188	29.8782	30.4956	29.8189	29.87	29.5982	29.762		284.66	6028800000	132		sp|P76558|MAO2_ECOLI NADP-dependent malic enzyme OS=Escherichia coli (strain K12) GN=maeB PE=1 SV=1
	0.910396	0.264452	P39831	30.0234	29.9885	30.065	30.5909	29.9325	29.8126	29.8721	29.9927		277.89	6610000000	87		sp|P39831|YDFG_ECOLI NADP-dependent 3-hydroxy acid dehydrogenase YdfG OS=Escherichia coli (strain K12) GN=ydfG PE=1 SV=2
	0.430957	0.262363	P0A6Y1	29.3005	29.3754	28.981	29.5778	29.2915	29.0318	28.378	29.4839		221.65	4089000000	69		sp|P0A6Y1|IHFB_ECOLI Integration host factor subunit beta OS=Escherichia coli (strain K12) GN=ihfB PE=1 SV=1
	0.625668	0.260953	P10378	25.9594	26.5176	26.5149	26.8717	26.0473	26.353	26.208	26.2116		53.878	515290000	20		sp|P10378|ENTE_ECOLI Enterobactin synthase component E OS=Escherichia coli (strain K12) GN=entE PE=1 SV=3
	0.736119	0.260743	P0AFI7	27.25	27.1391	26.9651	27.7524	27.0338	26.9144	27.1033	27.012		38.814	886730000	28		sp|P0AFI7|PDXH_ECOLI Pyridoxine/pyridoxamine 5-phosphate oxidase OS=Escherichia coli (strain K12) GN=pdxH PE=1 SV=2
	0.494245	0.258976	P34209	26.0996	26.2811	25.7534	26.7849	26.206	26.0545	25.9073	25.7154		40.404	480550000	18		sp|P34209|YDCF_ECOLI Protein YdcF OS=Escherichia coli (strain K12) GN=ydcF PE=1 SV=3
	0.579654	0.25842	P0AD27	24.7352	24.1528	25.0667	24.4597	24.486	24.4658	24.2434	24.1855		11.394	95535000	8		sp|P0AD27|YEJM_ECOLI Inner membrane protein YejM OS=Escherichia coli (strain K12) GN=yejM PE=1 SV=1
	0.499007	0.257878	P76550	26.0815	25.9706	25.6843	26.6078	25.7372	26.2323	25.6376	25.7056		24.776	376860000	19		sp|P76550|YFFS_ECOLI Uncharacterized protein YffS OS=Escherichia coli (strain K12) GN=yffS PE=4 SV=2
	0.799066	0.256777	P0AEW9	29.5963	29.6707	29.4485	30.1527	29.574	29.3411	29.4652	29.4608		323.31	4911900000	89		sp|P0AEW9|K1PF_ECOLI 1-phosphofructokinase OS=Escherichia coli (strain K12) GN=fruK PE=3 SV=1
	0.828239	0.256618	P0A6U8	29.7552	29.9665	29.6582	30.1992	29.8475	29.5858	29.3931	29.7262		240.82	5468000000	110		sp|P0A6U8|GLGA_ECOLI Glycogen synthase OS=Escherichia coli (strain K12) GN=glgA PE=1 SV=1
	0.36798	0.256056	P23845	27.9687	27.8906	27.4352	28.8666	27.8684	27.8011	27.7732	27.6942		176.01	1576900000	56		sp|P23845|CYSN_ECOLI Sulfate adenylyltransferase subunit 1 OS=Escherichia coli (strain K12) GN=cysN PE=1 SV=1
	0.503409	0.255971	P0AEX5	26.2761	25.8473	26.3419	26.9269	26.0527	26.0347	26.2985	25.9823		91.363	525530000	36		sp|P0AEX5|KPPR_ECOLI Probable phosphoribulokinase OS=Escherichia coli (strain K12) GN=prkB PE=3 SV=1
	0.962132	0.25565	P0A9T4	30.7188	30.525	30.6554	31.1266	30.3883	30.5428	30.573	30.4991		323.31	10590000000	188		sp|P0A9T4|TAS_ECOLI Protein tas OS=Escherichia coli (strain K12) GN=tas PE=1 SV=1
	0.591418	0.255544	P0AGG8	29.5238	29.6131	29.4659	30.3385	29.506	29.4826	29.4496	29.481		323.31	5015900000	128		sp|P0AGG8|TLDD_ECOLI Metalloprotease TldD OS=Escherichia coli (strain K12) GN=tldD PE=1 SV=1
	1.22457	0.254319	P0AEA8	27.1845	27.3287	27.3111	27.613	27.2637	27.0603	27.1274	26.9685		51.886	975750000	30		sp|P0AEA8|CYSG_ECOLI Siroheme synthase OS=Escherichia coli (strain K12) GN=cysG PE=1 SV=1
	1.56761	0.253551	P0A9T0	33.1063	32.7889	32.8685	33.0949	32.6594	32.6479	32.7484	32.7886		323.31	47480000000	411		sp|P0A9T0|SERA_ECOLI D-3-phosphoglycerate dehydrogenase OS=Escherichia coli (strain K12) GN=serA PE=1 SV=2
	0.780494	0.252383	P12994	28.2492	28.5869	28.2967	28.7244	28.4801	28.098	28.298	27.9715		52.106	2241200000	56		sp|P12994|YBHB_ECOLI UPF0098 protein YbhB OS=Escherichia coli (strain K12) GN=ybhB PE=1 SV=2
	0.493821	0.250943	P32664	26.7493	26.9672	27.2196	27.7798	27.0721	27.0069	26.8427	26.7904		134.76	824690000	31		sp|P32664|NUDC_ECOLI NADH pyrophosphatase OS=Escherichia coli (strain K12) GN=nudC PE=1 SV=2
	0.545972	0.249106	P0A6V1	30.5127	30.133	30.4189	29.576	29.8509	29.918	29.9595	29.9157		323.31	7120300000	146		sp|P0A6V1|GLGC_ECOLI Glucose-1-phosphate adenylyltransferase OS=Escherichia coli (strain K12) GN=glgC PE=1 SV=2
	0.34168	0.248023	P00562	25.6379	25.4291	24.9905	26.4127	25.5483	25.3443	25.129	25.4565		11.197	265580000	11		sp|P00562|AK2H_ECOLI Bifunctional aspartokinase/homoserine dehydrogenase 2 OS=Escherichia coli (strain K12) GN=metL PE=1 SV=3
	0.283178	0.247796	P0A6M4	24.6034	25.0266	24.8437	24.2433	24.6244	24.5669	23.5144	25.0201		12.222	138980000	11		sp|P0A6M4|DTD_ECOLI D-aminoacyl-tRNA deacylase OS=Escherichia coli (strain K12) GN=dtd PE=1 SV=1
	0.636512	0.246696	P68206	33.2553	33.1165	33.603	32.9485	32.6868	33.0287	33.279	32.9419		323.31	60023000000	325		sp|P68206|YJBJ_ECOLI UPF0337 protein YjbJ OS=Escherichia coli (strain K12) GN=yjbJ PE=1 SV=1
	0.449623	0.2461	P0A9N4	27.4765	27.0417	27.3129	28.162	27.1522	27.3679	27.1527	27.336		50.92	1085800000	34		sp|P0A9N4|PFLA_ECOLI Pyruvate formate-lyase 1-activating enzyme OS=Escherichia coli (strain K12) GN=pflA PE=1 SV=2
	0.563998	0.243906	Q46829	29.6932	29.6455	29.7076	30.456	29.7638	29.4906	29.6098	29.6625		131.57	5374900000	127		sp|Q46829|BGLA_ECOLI 6-phospho-beta-glucosidase BglA OS=Escherichia coli (strain K12) GN=bglA PE=1 SV=2
	0.607398	0.242327	P62623	26.1599	26.1475	26.1167	26.7872	25.9165	25.8754	26.2772	26.1728		37.653	443460000	12		sp|P62623|ISPH_ECOLI 4-hydroxy-3-methylbut-2-enyl diphosphate reductase OS=Escherichia coli (strain K12) GN=ispH PE=1 SV=1
	0.372656	0.24182	P28861	28.319	28.3624	28.3972	29.4466	28.2961	28.6075	28.3125	28.3418		87.304	2449400000	45		sp|P28861|FENR_ECOLI Ferredoxin--NADP reductase OS=Escherichia coli (strain K12) GN=fpr PE=1 SV=4
	0.436375	0.241695	P64506	27.6895	28.2665	27.7641	28.6477	27.7291	27.7024	27.823	28.1466		60.421	1563500000	31		sp|P64506|YEBY_ECOLI Uncharacterized protein YebY OS=Escherichia coli (strain K12) GN=yebY PE=3 SV=1
	0.587431	0.239527	P52037	24.739	24.732	25.2393	25.2017	24.4575	24.5901	24.8725	25.0338		23.726	158740000	15		sp|P52037|YGFF_ECOLI Uncharacterized oxidoreductase YgfF OS=Escherichia coli (strain K12) GN=ygfF PE=3 SV=2
	0.45875	0.239507	P66948	26.3539	26.8745	26.3883	27.3394	26.5455	26.5536	26.4905	26.4086		66.891	631590000	25		sp|P66948|BEPA_ECOLI Beta-barrel assembly-enhancing protease OS=Escherichia coli (strain K12) GN=bepA PE=1 SV=1
	0.531849	0.238606	P0A6K1	26.9556	26.8184	26.2687	27.222	26.6051	26.6968	26.5625	26.4458		85.239	738390000	23		sp|P0A6K1|DAPF_ECOLI Diaminopimelate epimerase OS=Escherichia coli (strain K12) GN=dapF PE=1 SV=1
	0.506021	0.238276	P0A862	33.9622	33.9733	33.977	34.8304	33.9834	33.9528	33.9624	33.8911		323.31	107790000000	374		sp|P0A862|TPX_ECOLI Thiol peroxidase OS=Escherichia coli (strain K12) GN=tpx PE=1 SV=2
	0.99382	0.236343	P16703	29.2405	29.5583	29.3835	29.3796	29.4294	29.0163	29.1959	28.975		242.24	3987300000	92		sp|P16703|CYSM_ECOLI Cysteine synthase B OS=Escherichia coli (strain K12) GN=cysM PE=1 SV=1
	1.38658	0.235792	P0AGJ9	29.9731	29.792	29.7741	29.552	29.4994	29.4834	29.6105	29.5547		186.07	5385900000	91		sp|P0AGJ9|SYY_ECOLI Tyrosine--tRNA ligase OS=Escherichia coli (strain K12) GN=tyrS PE=1 SV=2
	1.04327	0.235414	P76027	29.6533	29.7885	29.4568	29.9124	29.6162	29.3867	29.3369	29.5295		260.34	4980100000	105		sp|P76027|OPPD_ECOLI Oligopeptide transport ATP-binding protein OppD OS=Escherichia coli (strain K12) GN=oppD PE=3 SV=2
	0.961863	0.234948	P67910	32.3627	32.2561	32.2471	32.7518	32.1808	32.2529	32.1803	32.0639		323.31	31732000000	402		sp|P67910|HLDD_ECOLI ADP-L-glycero-D-manno-heptose-6-epimerase OS=Escherichia coli (strain K12) GN=hldD PE=1 SV=1
	0.510895	0.232517	P0AEU0	29.0474	29.7929	29.8923	29.3113	29.155	29.2949	29.4392	29.2248		176.83	4369700000	87		sp|P0AEU0|HISJ_ECOLI Histidine-binding periplasmic protein OS=Escherichia coli (strain K12) GN=hisJ PE=1 SV=1
	0.316482	0.23165	P22333	26.3717	26.0893	25.9083	27.102	26.3011	26.1326	25.6802	26.4308		23.314	469200000	15		sp|P22333|ADD_ECOLI Adenosine deaminase OS=Escherichia coli (strain K12) GN=add PE=3 SV=2
	0.824327	0.231381	P14900	29.1306	29.1902	29.1472	29.669	29.1307	29.0199	29.1495	28.9114		301.66	3764800000	67		sp|P14900|MURD_ECOLI UDP-N-acetylmuramoylalanine--D-glutamate ligase OS=Escherichia coli (strain K12) GN=murD PE=1 SV=3
	0.710373	0.229813	P09147	30.508	30.5303	30.5547	31.0878	30.4653	30.4573	30.5959	30.243		323.31	9927200000	181		sp|P09147|GALE_ECOLI UDP-glucose 4-epimerase OS=Escherichia coli (strain K12) GN=galE PE=1 SV=1
	0.385482	0.228626	P0A6T3	27.5396	27.492	27.066	27.7981	27.8513	27.157	27.0883	26.8845		64.628	1074300000	21		sp|P0A6T3|GAL1_ECOLI Galactokinase OS=Escherichia coli (strain K12) GN=galK PE=1 SV=2
	0.439535	0.228003	P45748	27.8219	28.2203	27.8986	28.8244	27.8606	27.9589	28.0678	27.9659		95.017	1899500000	54		sp|P45748|TSAC_ECOLI Threonylcarbamoyl-AMP synthase OS=Escherichia coli (strain K12) GN=tsaC PE=1 SV=2
	0.737059	0.227347	P0AF08	27.4379	27.7558	27.663	28.135	27.6333	27.4619	27.4533	27.5338		65.765	1256600000	53		sp|P0AF08|APBC_ECOLI Iron-sulfur cluster carrier protein OS=Escherichia coli (strain K12) GN=mrp PE=3 SV=1
	0.403231	0.227168	P42596	27.4534	27.4646	27.2574	28.3091	27.2218	27.5222	27.5449	27.287		72.248	1154300000	27		sp|P42596|RLMG_ECOLI Ribosomal RNA large subunit methyltransferase G OS=Escherichia coli (strain K12) GN=rlmG PE=1 SV=2
	0.968422	0.225987	P0ABS1	30.2328	30.046	29.9672	30.2837	29.7896	29.7579	30.1671	29.9111		323.31	6845900000	142		sp|P0ABS1|DKSA_ECOLI RNA polymerase-binding transcription factor DksA OS=Escherichia coli (strain K12) GN=dksA PE=1 SV=1
	0.924433	0.224856	P24203	24.7475	24.8002	25.2517	24.8113	24.7521	24.7345	24.5841	24.6405		14.513	132910000	5		sp|P24203|YJIA_ECOLI Uncharacterized GTP-binding protein YjiA OS=Escherichia coli (strain K12) GN=yjiA PE=1 SV=3
	1.23123	0.222374	P22255	26.4434	26.4227	26.5548	26.3276	26.2599	26.133	26.0408	26.4253		58.56	576370000	15		sp|P22255|CYSQ_ECOLI 3(2),5-bisphosphate nucleotidase CysQ OS=Escherichia coli (strain K12) GN=cysQ PE=1 SV=2
	0.757212	0.222149	P00961	29.3055	29.2096	29.0699	29.5595	29.3407	29.02	28.8555	29.0398		270.45	3705600000	90		sp|P00961|SYGB_ECOLI Glycine--tRNA ligase beta subunit OS=Escherichia coli (strain K12) GN=glyS PE=1 SV=4
	0.335677	0.221828	P17117	27.3115	27.4813	27.3528	28.4919	27.4091	27.4423	27.3644	27.5343		137.51	1217000000	41		sp|P17117|NFSA_ECOLI Oxygen-insensitive NADPH nitroreductase OS=Escherichia coli (strain K12) GN=nfsA PE=1 SV=2
	0.639674	0.221285	P37773	30.5791	30.4672	30.4917	31.1563	30.5221	30.464	30.3794	30.4438		323.31	9856000000	172		sp|P37773|MPL_ECOLI UDP-N-acetylmuramate--L-alanyl-gamma-D-glutamyl-meso-2,6-diaminoheptandioate ligase OS=Escherichia coli (strain K12) GN=mpl PE=1 SV=3
	0.545746	0.220121	P0ADU5	29.8168	29.1653	29.558	29.3023	29.0262	29.36	29.5203	29.0554		171.87	4493500000	75		sp|P0ADU5|YGIW_ECOLI Protein YgiW OS=Escherichia coli (strain K12) GN=ygiW PE=1 SV=1
	0.33515	0.219807	P0AEN8	25.2726	24.7238	24.8486	25.8331	24.6543	25.259	24.8933	24.9924		24.873	206380000	16		sp|P0AEN8|FUCM_ECOLI L-fucose mutarotase OS=Escherichia coli (strain K12) GN=fucU PE=1 SV=1
	0.242989	0.219426	P00579	28.3399	28.0947	28.1785	29.653	28.3007	28.4109	28.3033	28.3735		207.8	2363700000	50		sp|P00579|RPOD_ECOLI RNA polymerase sigma factor RpoD OS=Escherichia coli (strain K12) GN=rpoD PE=1 SV=2
	0.282311	0.21912	P00561	26.8706	26.3539	26.657	27.8206	26.6913	26.7901	26.8034	26.5409		41.357	781090000	23		sp|P00561|AK1H_ECOLI Bifunctional aspartokinase/homoserine dehydrogenase 1 OS=Escherichia coli (strain K12) GN=thrA PE=1 SV=2
	0.465737	0.218596	P39099	28.7887	28.8824	28.7315	29.5996	28.8015	28.7315	28.9485	28.6463		224.8	2945400000	76		sp|P39099|DEGQ_ECOLI Periplasmic pH-dependent serine endoprotease DegQ OS=Escherichia coli (strain K12) GN=degQ PE=1 SV=1
	0.270818	0.216471	P04846	24.7744	25.2323	24.4019	25.8631	25.1083	24.8808	24.6416	24.7752		8.4384	171730000	7		sp|P04846|NLPA_ECOLI Lipoprotein 28 OS=Escherichia coli (strain K12) GN=nlpA PE=1 SV=1
	0.123891	0.214605	P0AEL6	24.1584	24.6637	24.4646	26.9506	24.6183	25.016	25.045	24.6996		18.251	119500000	8		sp|P0AEL6|FEPB_ECOLI Ferrienterobactin-binding periplasmic protein OS=Escherichia coli (strain K12) GN=fepB PE=1 SV=1
	0.223728	0.214587	P05637	24.4626	24.9008	24.6834	25.705	24.9905	24.6108	25.2792	24.0128		14.614	174110000	14		sp|P05637|APAH_ECOLI Bis(5-nucleosyl)-tetraphosphatase [symmetrical] OS=Escherichia coli (strain K12) GN=apaH PE=1 SV=2
	0.973065	0.213446	P21367	29.704	29.9397	29.8866	29.657	29.8398	29.5622	29.4413	29.4902		145.59	5337900000	48		sp|P21367|YCAC_ECOLI Uncharacterized protein YcaC OS=Escherichia coli (strain K12) GN=ycaC PE=1 SV=1
	0.82741	0.213443	P0A8A0	28.2898	28.359	28.6006	28.8237	28.2642	28.2054	28.3606	28.3891		98.118	2115900000	46		sp|P0A8A0|YEBC_ECOLI Probable transcriptional regulatory protein YebC OS=Escherichia coli (strain K12) GN=yebC PE=1 SV=1
	0.374798	0.211674	P09546	28.6601	28.4841	28.1891	29.3198	28.5788	28.3585	28.3618	28.5072		228.98	2496000000	73		sp|P09546|PUTA_ECOLI Bifunctional protein PutA OS=Escherichia coli (strain K12) GN=putA PE=1 SV=3
	0.3021	0.208182	P0ACJ0	27.1891	26.8906	26.6753	27.8544	26.8726	26.9116	26.6784	27.3142		67.066	789120000	28		sp|P0ACJ0|LRP_ECOLI Leucine-responsive regulatory protein OS=Escherichia coli (strain K12) GN=lrp PE=1 SV=2
	0.837779	0.208001	P09832	31.0492	31.0286	30.9438	31.3948	30.943	30.7481	30.81	31.0832		323.31	13172000000	302		sp|P09832|GLTD_ECOLI Glutamate synthase [NADPH] small chain OS=Escherichia coli (strain K12) GN=gltD PE=1 SV=3
	0.270123	0.206994	P0ACJ8	26.8235	26.7171	26.577	27.924	26.8586	26.8305	26.9181	26.6064		33.021	748190000	28		sp|P0ACJ8|CRP_ECOLI cAMP-activated global transcriptional regulator CRP OS=Escherichia coli (strain K12) GN=crp PE=1 SV=1
	0.704587	0.20536	P0A6G7	32.0322	31.8966	31.9677	32.5119	31.928	31.8219	31.9307	31.9064		323.31	27982000000	278		sp|P0A6G7|CLPP_ECOLI ATP-dependent Clp protease proteolytic subunit OS=Escherichia coli (strain K12) GN=clpP PE=1 SV=1
	0.575063	0.204591	P09372	29.6717	29.0639	29.3765	29.394	28.8473	29.2366	29.2495	29.3544		271.98	4144900000	83		sp|P09372|GRPE_ECOLI Protein GrpE OS=Escherichia coli (strain K12) GN=grpE PE=1 SV=1
	0.387205	0.204055	P39180	28.6307	28.5685	28.3377	29.3812	28.4327	28.4914	28.5354	28.6423		295.55	2596900000	106		sp|P39180|AG43_ECOLI Antigen 43 OS=Escherichia coli (strain K12) GN=flu PE=1 SV=3
	0.453051	0.202153	P0ACF4	34.068	33.8803	34.0529	33.2862	33.3817	33.7423	33.6767	33.678		323.31	91882000000	319		sp|P0ACF4|DBHB_ECOLI DNA-binding protein HU-beta OS=Escherichia coli (strain K12) GN=hupB PE=1 SV=1
	1.02198	0.201939	P0AE12	29.0602	28.8817	28.6139	29.0146	28.7436	28.6732	28.6596	28.6862		215.05	2964300000	78		sp|P0AE12|AMN_ECOLI AMP nucleosidase OS=Escherichia coli (strain K12) GN=amn PE=1 SV=1
	0.313088	0.20178	P0AC84	25.5252	24.5815	25.0583	25.2937	24.8517	25.4031	24.5193	24.8775		17.449	196780000	10		sp|P0AC84|GLO2_ECOLI Hydroxyacylglutathione hydrolase OS=Escherichia coli (strain K12) GN=gloB PE=1 SV=1
	0.341177	0.201538	P26616	29.4057	29.1722	29.1076	30.1859	29.1392	29.3514	29.3445	29.2302		252.28	4369600000	99		sp|P26616|MAO1_ECOLI NAD-dependent malic enzyme OS=Escherichia coli (strain K12) GN=maeA PE=1 SV=4
	1.14803	0.201497	P0A7G2	28.8563	28.6998	28.7973	29.1028	28.5883	28.6593	28.6532	28.7494		199.49	2827200000	62		sp|P0A7G2|RBFA_ECOLI Ribosome-binding factor A OS=Escherichia coli (strain K12) GN=rbfA PE=1 SV=2
	0.503881	0.200009	P09551	29.3942	30.0095	30.0008	30.0259	29.3892	29.7439	29.832	29.6652		212.62	5733300000	111		sp|P09551|ARGT_ECOLI Lysine/arginine/ornithine-binding periplasmic protein OS=Escherichia coli (strain K12) GN=argT PE=1 SV=3
	0.695126	0.198664	P0A6T1	33.4515	33.1307	33.1364	32.9417	32.7243	33.0228	33.1531	32.9654		323.31	57613000000	462		sp|P0A6T1|G6PI_ECOLI Glucose-6-phosphate isomerase OS=Escherichia coli (strain K12) GN=pgi PE=1 SV=1
	0.353967	0.197886	P45470	28.6108	28.3492	27.9122	28.9209	28.46	28.1371	27.9932	28.4113		127.91	2156400000	47		sp|P45470|YHBO_ECOLI Protein YhbO OS=Escherichia coli (strain K12) GN=yhbO PE=1 SV=2
	0.61823	0.197721	P09424	28.6106	28.3158	28.3124	28.8947	28.2708	28.408	28.4639	28.1999		134.49	2414300000	65		sp|P09424|MTLD_ECOLI Mannitol-1-phosphate 5-dehydrogenase OS=Escherichia coli (strain K12) GN=mtlD PE=1 SV=3
	0.593594	0.197396	P75849	28.0171	28.0136	27.8621	28.5067	28.022	28.0245	27.7977	27.7659		65.5	1568300000	37		sp|P75849|YCBL_ECOLI Uncharacterized protein YcbL OS=Escherichia coli (strain K12) GN=ycbL PE=3 SV=1
	0.663537	0.196922	P76217	27.0854	27.5238	27.374	27.7431	27.2961	27.2765	27.133	27.233		118.87	1048200000	24		sp|P76217|ASTD_ECOLI N-succinylglutamate 5-semialdehyde dehydrogenase OS=Escherichia coli (strain K12) GN=astD PE=1 SV=1
	0.537244	0.196548	P45955	28.0972	28.4282	28.4494	28.803	28.221	28.107	28.1576	28.5059		55.963	2223000000	28		sp|P45955|YBGF_ECOLI Uncharacterized protein YbgF OS=Escherichia coli (strain K12) GN=ybgF PE=1 SV=2
	1.13925	0.195076	P33219	30.8606	30.8206	30.9363	30.566	30.5434	30.6488	30.6878	30.5232		255.86	11326000000	108		sp|P33219|YEBF_ECOLI Protein YebF OS=Escherichia coli (strain K12) GN=yebF PE=1 SV=2
	0.330936	0.194873	P11875	30.0418	29.9086	29.9044	30.9328	29.9141	30.0737	30.0724	29.9478		323.31	7412400000	199		sp|P11875|SYR_ECOLI Arginine--tRNA ligase OS=Escherichia coli (strain K12) GN=argS PE=1 SV=1
	0.718228	0.193876	P0AF36	30.8403	30.6961	30.8649	31.2885	30.6311	30.7541	30.762	30.7671		323.31	12112000000	163		sp|P0AF36|ZAPB_ECOLI Cell division protein ZapB OS=Escherichia coli (strain K12) GN=zapB PE=1 SV=1
	0.73128	0.193875	P0A9C3	28.1849	28.2988	28.2971	28.6455	28.087	28.0608	28.0929	28.41		144.13	1931600000	67		sp|P0A9C3|GALM_ECOLI Aldose 1-epimerase OS=Escherichia coli (strain K12) GN=galM PE=1 SV=1
	0.359778	0.192456	P39406	29.5719	29.9068	29.7337	30.5342	29.5954	29.7102	29.6507	30.0205		295.17	6084400000	125		sp|P39406|RSMC_ECOLI Ribosomal RNA small subunit methyltransferase C OS=Escherichia coli (strain K12) GN=rsmC PE=1 SV=3
	0.529103	0.192169	P76014	29.5386	29.6365	29.1985	29.9894	29.2812	29.4312	29.471	29.4108		263.79	4711600000	68		sp|P76014|DHAL_ECOLI PTS-dependent dihydroxyacetone kinase, ADP-binding subunit DhaL OS=Escherichia coli (strain K12) GN=dhaL PE=1 SV=3
	0.239881	0.192156	P10408	29.0598	29.0013	28.5705	30.085	29.0885	29.0506	28.9172	28.8916		265.66	3575500000	115		sp|P10408|SECA_ECOLI Protein translocase subunit SecA OS=Escherichia coli (strain K12) GN=secA PE=1 SV=2
	0.548229	0.190475	P60546	27.7713	27.7283	27.7012	28.3207	27.5833	27.7188	27.8646	27.5929		105.24	1615100000	46		sp|P60546|KGUA_ECOLI Guanylate kinase OS=Escherichia coli (strain K12) GN=gmk PE=1 SV=1
	0.416525	0.189866	P11447	26.1846	26.3309	26.4865	26.8824	26.6089	26.3928	26.0892	26.0339		46.048	606230000	23		sp|P11447|ARLY_ECOLI Argininosuccinate lyase OS=Escherichia coli (strain K12) GN=argH PE=1 SV=3
	0.531615	0.189377	P08312	30.8379	30.8756	30.8072	31.4873	30.744	30.8796	30.8127	30.8141		323.31	12438000000	237		sp|P08312|SYFA_ECOLI Phenylalanine--tRNA ligase alpha subunit OS=Escherichia coli (strain K12) GN=pheS PE=1 SV=2
	1.42829	0.189234	P0A6P9	35.6166	35.4447	35.5085	35.4174	35.3644	35.4019	35.314	35.15		323.31	299900000000	1943		sp|P0A6P9|ENO_ECOLI Enolase OS=Escherichia coli (strain K12) GN=eno PE=1 SV=2
	0.277631	0.187447	P11880	26.6591	26.4148	26.8956	27.6948	26.6763	26.8229	26.7396	26.6759		91.189	747500000	21		sp|P11880|MURF_ECOLI UDP-N-acetylmuramoyl-tripeptide--D-alanyl-D-alanine ligase OS=Escherichia coli (strain K12) GN=murF PE=1 SV=2
	0.710117	0.186208	P0AC53	30.6271	30.5374	30.3051	30.8161	30.5681	30.3547	30.2239	30.3942		323.31	9266700000	207		sp|P0AC53|G6PD_ECOLI Glucose-6-phosphate 1-dehydrogenase OS=Escherichia coli (strain K12) GN=zwf PE=1 SV=1
	0.127746	0.186173	P77213	23.8444	25.4513	25.4272	26.4723	25.0743	25.2906	25.1293	24.9563		8.9813	252400000	9		sp|P77213|GCS2_ECOLI Putative glutamate--cysteine ligase 2 OS=Escherichia coli (strain K12) GN=ybdK PE=1 SV=1
	0.786885	0.184059	P00888	27.2594	27.101	27.0412	27.46	26.9741	27.0421	27.2151	26.8941		135.47	855130000	28		sp|P00888|AROF_ECOLI Phospho-2-dehydro-3-deoxyheptonate aldolase, Tyr-sensitive OS=Escherichia coli (strain K12) GN=aroF PE=1 SV=1
	1.32224	0.183951	P13029	30.9118	30.9504	30.9816	31.0569	30.9053	30.7945	30.601	30.864		323.31	11968000000	224		sp|P13029|KATG_ECOLI Catalase-peroxidase OS=Escherichia coli (strain K12) GN=katG PE=1 SV=2
	0.639577	0.183327	P0A698	29.1396	29.333	28.953	29.5464	29.1114	29.0733	28.9146	29.1394		227.62	3641600000	88		sp|P0A698|UVRA_ECOLI UvrABC system protein A OS=Escherichia coli (strain K12) GN=uvrA PE=1 SV=1
	1.07824	0.183173	P18843	30.9977	31.023	31.0557	31.3371	30.8016	30.9723	30.9628	30.9441		323.31	13372000000	217		sp|P18843|NADE_ECOLI NH(3)-dependent NAD(+) synthetase OS=Escherichia coli (strain K12) GN=nadE PE=1 SV=2
	0.595798	0.182378	P21165	30.8134	30.558	30.7323	31.2381	30.6494	30.6492	30.6494	30.6643		323.31	11273000000	187		sp|P21165|PEPQ_ECOLI Xaa-Pro dipeptidase OS=Escherichia coli (strain K12) GN=pepQ PE=1 SV=2
	0.851807	0.181007	P15288	32.5313	32.057	32.2042	32.166	32.0349	32.1404	32.0652	31.994		323.31	29950000000	356		sp|P15288|PEPD_ECOLI Cytosol non-specific dipeptidase OS=Escherichia coli (strain K12) GN=pepD PE=1 SV=3
	0.582556	0.179337	P0AEN1	26.9731	27.047	27.0987	27.4782	26.9025	27.0939	27.1385	26.7447		51.001	892780000	21		sp|P0AEN1|FRE_ECOLI NAD(P)H-flavin reductase OS=Escherichia coli (strain K12) GN=fre PE=1 SV=2
	0.465359	0.177923	P21499	28.3911	28.317	28.3321	28.9271	28.2687	28.5851	28.2215	28.1803		97.595	2120300000	37		sp|P21499|RNR_ECOLI Ribonuclease R OS=Escherichia coli (strain K12) GN=rnr PE=1 SV=2
	0.28592	0.177566	P0A705	31.0346	31.0682	30.7753	31.9571	31.0347	30.9826	31.0471	31.0606		323.31	14011000000	273		sp|P0A705|IF2_ECOLI Translation initiation factor IF-2 OS=Escherichia coli (strain K12) GN=infB PE=1 SV=1
	0.465101	0.17664	P75960	28.5216	28.5974	28.3547	29.1073	28.4102	28.4318	28.3978	28.6346		84.146	2300500000	38		sp|P75960|NPD_ECOLI NAD-dependent protein deacylase OS=Escherichia coli (strain K12) GN=cobB PE=1 SV=2
	0.393986	0.17541	P0A8A2	28.5662	28.3357	28.5729	29.1324	28.2356	28.4115	28.583	28.6754		138.55	2329600000	62		sp|P0A8A2|YEEN_ECOLI Probable transcriptional regulatory protein YeeN OS=Escherichia coli (strain K12) GN=yeeN PE=1 SV=1
	1.14986	0.173908	P00956	32.5492	32.4938	32.5967	32.8431	32.4937	32.4578	32.4294	32.4063		323.31	39003000000	609		sp|P00956|SYI_ECOLI Isoleucine--tRNA ligase OS=Escherichia coli (strain K12) GN=ileS PE=1 SV=5
	0.585891	0.173394	P33136	30.7218	30.594	30.6476	31.0903	30.5997	30.7337	30.6707	30.356		323.31	10871000000	206		sp|P33136|OPGG_ECOLI Glucans biosynthesis protein G OS=Escherichia coli (strain K12) GN=mdoG PE=1 SV=1
	1.50191	0.172814	P0A8E1	27.6134	27.5896	27.5798	27.6283	27.5329	27.3127	27.3371	27.5373		70.397	1177200000	27		sp|P0A8E1|YCFP_ECOLI UPF0227 protein YcfP OS=Escherichia coli (strain K12) GN=ycfP PE=1 SV=1
	0.238792	0.172119	P77552	25.5272	24.8525	25.3308	26.1823	25.0609	25.2418	25.3972	25.5044		33.574	270520000	17		sp|P77552|YDHQ_ECOLI Uncharacterized protein YdhQ OS=Escherichia coli (strain K12) GN=ydhQ PE=4 SV=1
	0.533848	0.172075	P0A8N3	32.661	32.5244	32.5843	33.17	32.5477	32.5708	32.5171	32.6158		323.31	42011000000	556		sp|P0A8N3|SYK1_ECOLI Lysine--tRNA ligase OS=Escherichia coli (strain K12) GN=lysS PE=1 SV=2
	0.285701	0.172042	P0A6P5	26.7864	27.3351	26.8513	27.7434	27.2898	27.0799	26.8154	26.8429		31.295	873420000	26		sp|P0A6P5|DER_ECOLI GTPase Der OS=Escherichia coli (strain K12) GN=der PE=1 SV=1
	0.864278	0.171114	P40874	28.8849	28.8648	28.8438	29.1701	28.8869	28.8719	28.6566	28.6638		204.1	3064300000	57		sp|P40874|MTOX_ECOLI N-methyl-L-tryptophan oxidase OS=Escherichia coli (strain K12) GN=solA PE=1 SV=1
	0.257861	0.170353	P52061	29.8465	30.1366	30.1295	31.0538	30.243	29.9461	30.1105	30.1854		308.16	7590500000	150		sp|P52061|RDGB_ECOLI dITP/XTP pyrophosphatase OS=Escherichia coli (strain K12) GN=rdgB PE=1 SV=1
	0.128425	0.170138	P30126	26.9153	26.772	26.8582	25.8258	26.9998	26.8536	25.161	26.6763		25.035	640980000	15		sp|P30126|LEUD_ECOLI 3-isopropylmalate dehydratase small subunit OS=Escherichia coli (strain K12) GN=leuD PE=1 SV=3
	0.289215	0.16905	P25553	27.9755	28.0723	28.1702	29.0069	27.99	28.1396	28.2678	28.1513		160.07	1901700000	52		sp|P25553|ALDA_ECOLI Lactaldehyde dehydrogenase OS=Escherichia coli (strain K12) GN=aldA PE=1 SV=2
	0.072338	0.168998	P62517	25.2654	26.4453	26.4247	25.6282	26.4598	26.6338	26.5682	23.4259		1.6522	456460000	5		sp|P62517|OPGH_ECOLI Glucans biosynthesis glucosyltransferase H OS=Escherichia coli (strain K12) GN=mdoH PE=1 SV=1
	0.2448	0.167883	P77247	26.6694	27.1219	26.7121	27.8672	26.9103	26.8591	26.9517	26.9779		65.1	795310000	26		sp|P77247|YNIC_ECOLI 2-deoxyglucose-6-phosphate phosphatase OS=Escherichia coli (strain K12) GN=yniC PE=1 SV=1
	0.560897	0.166564	P0AAX8	29.654	29.8605	29.6505	30.1769	29.7739	29.5526	29.7787	29.5705		264.25	5484300000	119		sp|P0AAX8|YBIS_ECOLI Probable L,D-transpeptidase YbiS OS=Escherichia coli (strain K12) GN=ybiS PE=1 SV=1
	0.40384	0.166074	P0C0V0	28.3185	28.1877	28.1227	28.8419	28.2257	28.2465	28.353	27.9813		136.11	2038700000	52		sp|P0C0V0|DEGP_ECOLI Periplasmic serine endoprotease DegP OS=Escherichia coli (strain K12) GN=degP PE=1 SV=1
	0.694779	0.165243	P0ADS6	30.5358	30.4844	30.6906	30.9586	30.3962	30.4733	30.6038	30.5351		323.31	10338000000	222		sp|P0ADS6|YGGE_ECOLI Uncharacterized protein YggE OS=Escherichia coli (strain K12) GN=yggE PE=4 SV=1
	0.605258	0.164158	P0A6W9	29.8337	29.8644	29.7939	30.2969	29.7081	29.7951	29.9251	29.704		266.17	6150700000	108		sp|P0A6W9|GSH1_ECOLI Glutamate--cysteine ligase OS=Escherichia coli (strain K12) GN=gshA PE=1 SV=1
	0.112498	0.163925	P77454	29.9252	29.8569	29.9762	27.7796	29.0457	29.2175	29.2262	29.3929		199.08	4667500000	53		sp|P77454|GLSA1_ECOLI Glutaminase 1 OS=Escherichia coli (strain K12) GN=glsA1 PE=1 SV=1
	0.0760489	0.158684	P0AFJ7	26.2733	26.5656	26.544	26.2296	27.1816	26.9059	24.0209	26.8694		78.625	630430000	17		sp|P0AFJ7|PITA_ECOLI Low-affinity inorganic phosphate transporter 1 OS=Escherichia coli (strain K12) GN=pitA PE=1 SV=1
	0.232084	0.158613	P25539	28.5769	28.5925	28.5567	29.6054	28.5972	28.4845	28.6691	28.9461		178.74	2959500000	74		sp|P25539|RIBD_ECOLI Riboflavin biosynthesis protein RibD OS=Escherichia coli (strain K12) GN=ribD PE=1 SV=1
	0.848344	0.158551	P07118	31.3727	31.4616	31.3185	31.7341	31.3341	31.3406	31.3105	31.2675		323.31	17467000000	383		sp|P07118|SYV_ECOLI Valine--tRNA ligase OS=Escherichia coli (strain K12) GN=valS PE=1 SV=2
	1.22305	0.157475	P39451	30.859	30.8002	30.8464	31.0401	30.7871	30.8051	30.7061	30.6175		323.31	11919000000	136		sp|P39451|ADHP_ECOLI Alcohol dehydrogenase, propanol-preferring OS=Escherichia coli (strain K12) GN=adhP PE=1 SV=1
	0.160159	0.157359	P76578	26.3404	26.5928	26.3239	26.3159	25.3976	26.1065	26.2337	27.2057		8.2152	470170000	12		sp|P76578|YFHM_ECOLI Uncharacterized lipoprotein YfhM OS=Escherichia coli (strain K12) GN=yfhM PE=1 SV=1
	0.223241	0.156868	P0AEE8	25.6529	25.4184	25.3092	24.6074	25.2696	25.3456	25.1507	24.5945		8.4094	209320000	8		sp|P0AEE8|DMA_ECOLI DNA adenine methylase OS=Escherichia coli (strain K12) GN=dam PE=1 SV=1
	0.359489	0.156742	P0A6A3	32.7989	32.6371	32.6163	31.9604	32.3936	32.375	32.2507	32.3664		323.31	37343000000	347		sp|P0A6A3|ACKA_ECOLI Acetate kinase OS=Escherichia coli (strain K12) GN=ackA PE=1 SV=1
	0.26961	0.156241	P0AA16	26.1733	25.7076	25.6569	26.5536	25.9396	25.6146	26.1335	25.7788		27.381	387660000	14		sp|P0AA16|OMPR_ECOLI Transcriptional regulatory protein OmpR OS=Escherichia coli (strain K12) GN=ompR PE=1 SV=1
	0.305228	0.15616	P67826	27.9664	28.1521	27.9483	28.7787	28.2951	28.0497	28.0264	27.8496		129.79	1813300000	33		sp|P67826|CUTC_ECOLI Copper homeostasis protein CutC OS=Escherichia coli (strain K12) GN=cutC PE=3 SV=1
	0.169252	0.155774	P08373	26.0215	25.9074	25.712	26.7661	26.0266	26.0912	26.4783	25.1879		55.808	415140000	15		sp|P08373|MURB_ECOLI UDP-N-acetylenolpyruvoylglucosamine reductase OS=Escherichia coli (strain K12) GN=murB PE=1 SV=1
	0.32826	0.155448	P37005	27.0053	26.9005	26.7021	26.1979	26.3713	26.8044	26.5228	26.4855		53.51	620260000	15		sp|P37005|LAST_ECOLI Uncharacterized tRNA/rRNA methyltransferase LasT OS=Escherichia coli (strain K12) GN=lasT PE=3 SV=2
	0.554544	0.154922	P07813	32.3693	32.2875	32.4082	32.8099	32.2843	32.3765	32.4297	32.1646		323.31	34624000000	474		sp|P07813|SYL_ECOLI Leucine--tRNA ligase OS=Escherichia coli (strain K12) GN=leuS PE=1 SV=2
	1.30293	0.15354	P0A6P7	29.5545	29.3871	29.3279	29.2985	29.2398	29.1688	29.2548	29.2906		148.41	4162200000	56		sp|P0A6P7|ENGB_ECOLI Probable GTP-binding protein EngB OS=Escherichia coli (strain K12) GN=engB PE=1 SV=1
	0.411426	0.153447	P15047	26.2642	26.5975	26.1077	25.9629	25.8318	26.0523	26.1756	26.2589		69.895	435200000	24		sp|P15047|ENTA_ECOLI 2,3-dihydro-2,3-dihydroxybenzoate dehydrogenase OS=Escherichia coli (strain K12) GN=entA PE=1 SV=1
	0.48878	0.153243	P63224	30.8224	30.6898	30.6779	31.2367	30.6839	30.7668	30.812	30.5511		323.31	12213000000	131		sp|P63224|GMHA_ECOLI Phosphoheptose isomerase OS=Escherichia coli (strain K12) GN=gmhA PE=1 SV=1
	0.197511	0.152858	P0A6I3	26.573	26.652	26.6806	27.7694	26.5583	26.8954	27.0117	26.5982		54.534	739850000	25		sp|P0A6I3|COAA_ECOLI Pantothenate kinase OS=Escherichia coli (strain K12) GN=coaA PE=1 SV=1
	0.419247	0.152371	P30958	26.5992	26.6702	26.8122	26.9449	26.9378	26.3283	26.7364	26.4146		20.171	623150000	15		sp|P30958|MFD_ECOLI Transcription-repair-coupling factor OS=Escherichia coli (strain K12) GN=mfd PE=1 SV=2
	0.528783	0.151763	P0AF03	28.1939	28.2617	28.2214	28.6295	28.1394	28.2035	28.3834	27.9731		90.607	2027000000	40		sp|P0AF03|MOG_ECOLI Molybdopterin adenylyltransferase OS=Escherichia coli (strain K12) GN=mog PE=1 SV=1
	0.265693	0.151015	P0A6D3	28.8677	28.6303	28.6381	29.6133	28.8615	28.7794	28.7901	28.7144		145.16	3016400000	94		sp|P0A6D3|AROA_ECOLI 3-phosphoshikimate 1-carboxyvinyltransferase OS=Escherichia coli (strain K12) GN=aroA PE=1 SV=1
	0.446433	0.150884	P0ACA7	29.3673	29.2498	29.4937	29.8961	29.2929	29.2429	29.3649	29.5027		238.36	4483900000	96		sp|P0ACA7|GSTB_ECOLI Glutathione S-transferase GstB OS=Escherichia coli (strain K12) GN=gstB PE=1 SV=1
	0.904522	0.150364	P76403	27.3176	27.2371	27.4792	27.5166	27.1589	27.1451	27.2808	27.3641		69.018	1051800000	39		sp|P76403|YEGQ_ECOLI Uncharacterized protease YegQ OS=Escherichia coli (strain K12) GN=yegQ PE=3 SV=1
	1.41515	0.149609	P0A9Q9	33.1623	33.205	33.0621	33.2243	33.098	32.937	32.9403	33.08		323.31	59709000000	432		sp|P0A9Q9|DHAS_ECOLI Aspartate-semialdehyde dehydrogenase OS=Escherichia coli (strain K12) GN=asd PE=1 SV=1
	0.479372	0.149076	P02925	30.8089	31.2868	31.3533	31.1229	30.8005	30.9786	31.0608	31.1358		323.31	13743000000	262		sp|P02925|RBSB_ECOLI Ribose import binding protein RbsB OS=Escherichia coli (strain K12) GN=rbsB PE=1 SV=1
	0.372144	0.147406	P69776	30.3834	30.452	30.0908	30.8723	30.4511	30.2644	30.3295	30.1639		312.44	8922000000	106		sp|P69776|LPP_ECOLI Major outer membrane lipoprotein Lpp OS=Escherichia coli (strain K12) GN=lpp PE=1 SV=1
	0.788931	0.146407	P0A9W9	29.2443	28.8902	28.984	29.2305	28.9435	29.0017	28.9328	28.8853		234.87	3367400000	96		sp|P0A9W9|YRDA_ECOLI Protein YrdA OS=Escherichia coli (strain K12) GN=yrdA PE=1 SV=1
	0.514447	0.146322	P0A7I7	25.9781	25.9166	25.7888	26.3622	25.915	25.8671	25.9356	25.7427		21.054	372280000	10		sp|P0A7I7|RIBA_ECOLI GTP cyclohydrolase-2 OS=Escherichia coli (strain K12) GN=ribA PE=1 SV=1
[truncated: 734 more rows]

## Sheet: T. elongata RAW_Proteins
Protein IDs	Majority protein IDs	Peptide counts (all)	Peptide counts (razor+unique)	Peptide counts (unique)	Fasta headers	Number of proteins	Peptides	Razor + unique peptides	Unique peptides	Peptides 3H_1	Peptides 3H_2	Peptides 3H_3	Peptides 3H_4	Peptides Ox_1	Peptides Ox_2	Peptides Ox_3	Peptides Ox_4	Razor + unique peptides 3H_1	Razor + unique peptides 3H_2	Razor + unique peptides 3H_3	Razor + unique peptides 3H_4	Razor + unique peptides Ox_1	Razor + unique peptides Ox_2	Razor + unique peptides Ox_3	Razor + unique peptides Ox_4	Unique peptides 3H_1	Unique peptides 3H_2	Unique peptides 3H_3	Unique peptides 3H_4	Unique peptides Ox_1	Unique peptides Ox_2	Unique peptides Ox_3	Unique peptides Ox_4	Sequence coverage [%]	Unique + razor sequence coverage [%]	Unique sequence coverage [%]	Mol. weight [kDa]	Sequence length	Sequence lengths	Q-value	Score	Identification type 3H_1	Identification type 3H_2	Identification type 3H_3	Identification type 3H_4	Identification type Ox_1	Identification type Ox_2	Identification type Ox_3	Identification type Ox_4
[truncated: 1,742 more rows]
[truncated: 55 more columns]

[truncated: 1 more sheets: E. coli RAW_Proteins]
